# Supplementary material
Source: HighWire-hosted journal article supplement (https://gut.bmj.com/content/gutjnl-2019-319858)

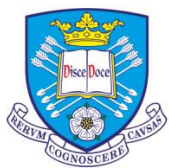

The  
University  
Of  
Sheffield.

School of  
Health  
And  
Related  
Research.

## Surveillance for the prevention of colorectal cancer in people with polyps

Alison Scope, Ruth Wong, Jo Leaviss, Sue Harnan, Jean Hamilton, Edward Goka, Edith Poku, Sophie Whyte.

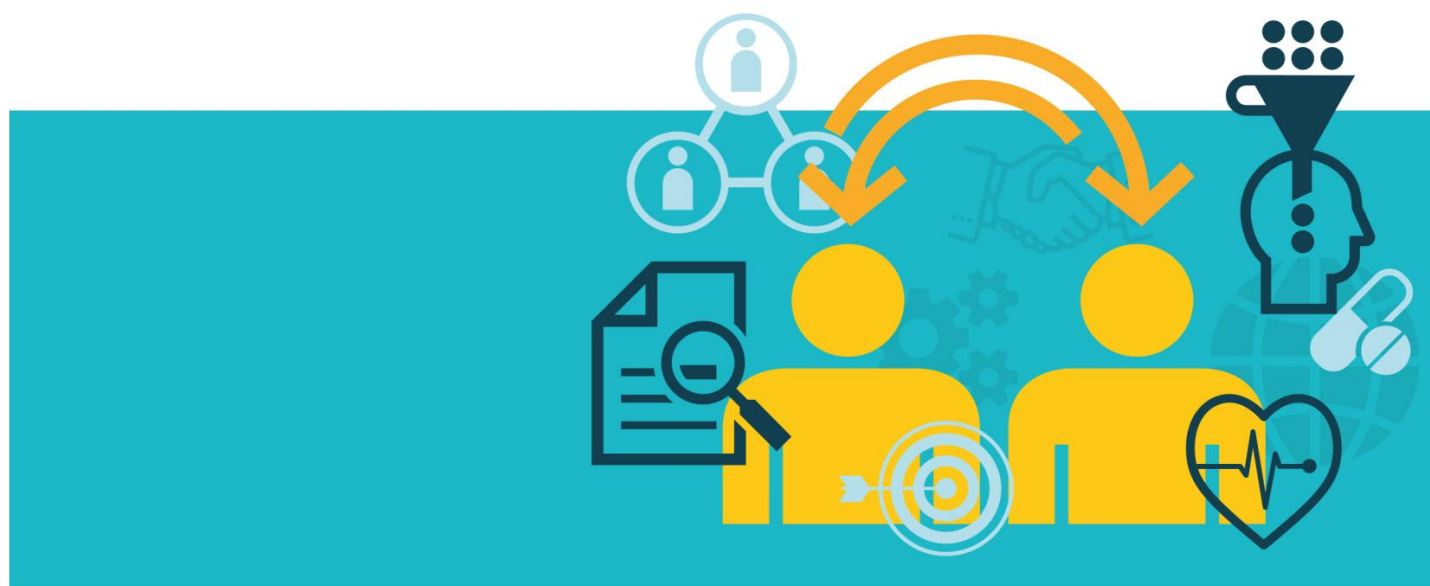

Date: August 2018

Prepared for: Public Health England

© University of Sheffield 2016

All rights including those in copyright in the content of this report are owned by The University of Sheffield. Except as otherwise expressly permitted, the content of this report may not be copied, altered or reproduced, republished, broadcast or transmitted in any way without first obtaining permission.

## 1. Introduction

This project report has been produced to document the methods and results of the systematic reviews and evidence syntheses undertaken by SchARR. The systematic reviews addressed analytical questions to aid the development of the British Society of Gastroenterology (BSG) guideline, specifically the section of the BSG guideline addressing surveillance following detection of colorectal adenomas, specifically, the initiation and subsequent continuation, or discontinuation, of surveillance following detection of colorectal cancer.

SchARRs remit was to provide systematic reviews and narrative syntheses for seven clinical questions, across sixteen prognostic factors and this report will present the methods and results of those reviews. Evidence sifting was undertaken for four additional clinical questions and details of that work can be found in appendix 1. SchARR also undertook searches for additional questions (details of these searches can be found in appendix 2).

The overall aim was to identify and evaluate the evidence relating to the following seven clinical questions (CQs) and to present a narrative synthesis of the evidence for each question. For CQ1, 2, 4, 5 and 6 the evidence was to be presented by sixteen prognostic factors that were either polyp, patient, or procedure related (see Table 2. For details);

- CQ 1 - Who is at increased risk of developing CRC or advanced adenomas post-polypectomy (polyp clearance) at index colonoscopy?
- CQ 2 - What is the evidence that 1st surveillance (as opposed to index colonoscopy polyp clearance) reduces future CRC risk?
- CQ3 - At what interval should 1st surveillance be performed?
- CQ4 - Who is at higher risk of developing CRC or advanced adenomas post-1st surveillance (Findings at 1st surveillance alone)?
- CQ5 - Who is at higher risk of developing CRC or advanced adenomas post-1st surveillance (Summative findings of index plus 1st surveillance)?
- CQ6 - What is the evidence that 2nd (and subsequent) surveillance reduces future CRC risk?
- CQ7 - At what interval should 2nd (and subsequent) surveillance be performed?

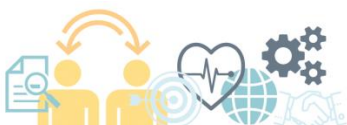

## 2. Methods

The systematic review was undertaken in accordance with the general principles recommended in the Preferred Reporting Items for Systematic Reviews and Meta-Analyses (PRISMA) statement (PRISMA, 2009).

### *Searching for the evidence*

A systematic literature search was undertaken to identify all published evidence relevant to the review questions for the revised guideline. The search undertaken was in accordance with the parameters stipulated within the NICE guidelines manual (NICE, 2014). Databases were searched using relevant medical subject headings, free-text terms and study-type filters (such RCTs, systematic reviews and observational studies) where appropriate. Bibliographic search strategies were performed on 25th January 2018 in Medline [via Ovid], Embase [via Ovid] and Cochrane Library [via Wiley Online Library] and date limits applied from 2007 until 2018 using two search strategies combined into one:

1. Terms for colorectal cancer terms (1-2) were combined with terms for 'polyp' (3-6) and 'colonoscopy/surveillance' (7-9) and 'incidence/prevalence/risk' (14-19).
2. Terms for colorectal cancer terms (1-2) were combined with terms for 'polyp' (3-6) or 'colonoscopy' (7-8). The search was combined with 'surveillance/screening' (9).

An English language limit and exclusion publications filter (11-27) were applied. (see Appendix 2 for search terms)

In addition, we cross-checked against the reference lists of highly relevant papers or guidelines and asked the guideline committee members to highlight any additional studies.

### *Study selection*

Citations were downloaded to EndNote bibliographic management software. All citations were sifted by one reviewer and checked by a second reviewer.

### **Inclusion criteria**

Included studies were in populations of adults who had been diagnosed with at least one colorectal adenoma and all detected adenomas had been resected completely at index colonoscopy. The specific inclusion criteria for each question are presented in the population, exposure/intervention, comparator, outcome (PECO/PICO) format in Table 1. below.



**Table 1. Inclusion criteria for questions 1 to 7**

| Clinical question                                                                                                        | Population                                                                                                                                      | Exposure / intervention                                                                                                         | Comparator                                                               | Outcome                                                                                                                                                                                                                                             |
|--------------------------------------------------------------------------------------------------------------------------|-------------------------------------------------------------------------------------------------------------------------------------------------|---------------------------------------------------------------------------------------------------------------------------------|--------------------------------------------------------------------------|-----------------------------------------------------------------------------------------------------------------------------------------------------------------------------------------------------------------------------------------------------|
| Who is at increased risk of developing CRC or advanced adenomas post-polypectomy (polyp clearance) at index colonoscopy? | Adults (18 years or over) who have been diagnosed with at least one colorectal adenoma and all detected adenomas have been resected completely. | Presence of prognostic factor (analyses presented separately for each prognostic factor listed in table 2.)                     | Absence of prognostic factor or comparator                               | Advanced adenoma incidence at next surveillance (diameter $\geq 10$ mm or HGD or villous component $\geq 25\%$ ); CRC incidence at next surveillance (includes interval CRCs as well if reported); Long-term CRC incidence; Long-term CRC mortality |
| What is the evidence that 1st surveillance (as opposed to index colonoscopy polyp clearance) reduces future CRC risk?    | Adults (18 years or over) who have been diagnosed with at least one colorectal adenoma and all detected adenomas have been resected completely. | Colonoscopic surveillance (analyses presented separately for each prognostic factor listed in table 2.)                         | No surveillance                                                          | Long-term CRC incidence; Long-term CRC mortality; with general population comparator where reported; to include health economic analyses                                                                                                            |
| At what interval should 1st surveillance be performed?                                                                   | Adults (18 years or over) who have been diagnosed with at least one colorectal adenoma and all detected adenomas have been resected completely. | Surveillance interval (e.g. 3 year surveillance)                                                                                | Comparator surveillance interval (e.g. earlier than 3 year surveillance) | Advanced adenoma incidence at next surveillance (diameter $\geq 10$ mm or HGD or villous component $\geq 25\%$ ); CRC incidence at next surveillance (includes interval CRCs as well if reported); Long-term CRC incidence; Long-term CRC mortality |
| Who is at higher risk of developing CRC or advanced adenomas post-1st surveillance?                                      | Adults (18 years or over) who have completed first surveillance colonoscopy                                                                     | Findings at 1st surveillance alone (analyses presented separately for each prognostic factor listed in table 2.)                | Absence of I                                                             | Advanced adenoma incidence at next surveillance (diameter $\geq 10$ mm or HGD or villous component $\geq 25\%$ ); CRC incidence at next surveillance (includes interval CRCs as well if reported); Long-term CRC incidence; Long-term CRC mortality |
| Who is at higher risk of developing CRC or advanced adenomas post-1st surveillance?                                      | Adults (18 years or over) who have completed first surveillance colonoscopy                                                                     | Summative findings of index plus 1st surveillance (analyses presented separately for each prognostic factor listed in table 2.) | Absence of I                                                             | Advanced adenoma incidence at next surveillance (diameter $\geq 10$ mm or HGD or villous component $\geq 25\%$ ); CRC incidence at next surveillance (includes interval CRCs as well if reported); Long-term CRC incidence; Long-term CRC mortality |

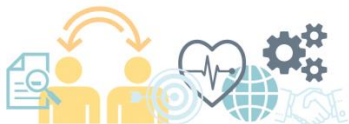

| Clinical question                                                                    | Population                                                                  | Exposure / intervention                                                                                     | Comparator                       | Outcome                                                                                                                                                                                                                                             |
|--------------------------------------------------------------------------------------|-----------------------------------------------------------------------------|-------------------------------------------------------------------------------------------------------------|----------------------------------|-----------------------------------------------------------------------------------------------------------------------------------------------------------------------------------------------------------------------------------------------------|
| What is the evidence that 2nd (and subsequent) surveillance reduces future CRC risk? | Adults (18 years or over) who have completed first surveillance colonoscopy | 2nd colonoscopic surveillance (analyses presented separately for each prognostic factor listed in table 2.) | No 2nd surveillance              | Long-term CRC incidence; Long-term CRC mortality; with general population comparator where reported; to include health economic analyses                                                                                                            |
| At what interval should 2nd (and subsequent) surveillance be performed?              | Adults (18 years or over) who have completed first surveillance colonoscopy | 3 year surveillance                                                                                         | earlier than 3 year surveillance | Advanced adenoma incidence at next surveillance (diameter $\geq 10$ mm or HGD or villous component $\geq 25\%$ ); CRC incidence at next surveillance (includes interval CRCs as well if reported); Long-term CRC incidence; Long-term CRC mortality |

An additional outcome measure was included during the course of the review as it was deemed important. The outcome measure was a composite outcome of advanced adenoma and colorectal cancer, usually termed advanced neoplasia (AN). Studies were included if they did not report AA or CRC outcomes separately but did report the outcome AN and the study population exceeded 1000 patients.



**Table 2. Polyp, patient and Procedure related characteristics and comparators to be analysed across each CQ**

| Exposure (Polyp/Patient or Procedure characteristics)                                                                                           | Comparator                                                                                       |
|-------------------------------------------------------------------------------------------------------------------------------------------------|--------------------------------------------------------------------------------------------------|
| <b>Polyp</b>                                                                                                                                    |                                                                                                  |
| High grade dysplasia                                                                                                                            | Low grade dysplasia                                                                              |
| Villous component $\geq 25\%$ (tubulovillous or villous histology)                                                                              | NO Villous component $\geq 25\%$ (tubulovillous or villous histology)                            |
| Size of largest adenoma (variants: $\geq 10\text{mm}$ , or $\geq 20\text{mm}$ )                                                                 | Size of largest adenoma NOT greater than (variants: $\geq 10\text{mm}$ , or $\geq 20\text{mm}$ ) |
| Number of adenomas (variants: 1,2,3,4,5-9,10+; the main categories may be 1-2, 3-4 and 5+ but we would like to capture all reported variations) | N/a                                                                                              |
| Presence of adenoma in proximal colon                                                                                                           | Absence of adenoma in proximal colon                                                             |
| Adenoma morphology (variants: pedunculated, sessile, flat)                                                                                      | N/a                                                                                              |
| <b>Patient</b>                                                                                                                                  |                                                                                                  |
| Male gender                                                                                                                                     | Female gender                                                                                    |
| Family history of CRC                                                                                                                           | NO Family history of CRC                                                                         |
| Younger age (e.g. $<55$ vs $55+$ ; there will be other variants of age cut-off and we would like to capture these too)                          | NOT in Younger age range                                                                         |
| Older age (e.g. $<75$ vs $75+$ ; there will be other variants of age cut-off and we would like to capture these too)                            | NOT in Older age range                                                                           |
| Smoking (variants: current, ex, never)                                                                                                          | N/a                                                                                              |
| High body mass index (e.g. $\text{BMI} > 25$ )?                                                                                                 | NOT High body mass index                                                                         |
| <b>Procedure</b>                                                                                                                                |                                                                                                  |
| Index colonoscopy Bowel prep quality (variants: good, adequate, inadequate/poor)                                                                | Inadequate/poor bowel prep                                                                       |
| Index colonoscopy complete to caecum                                                                                                            | incomplete colonoscopy                                                                           |
| Index colonoscopy by high-quality colonoscopist                                                                                                 | NOT high quality colonoscopist                                                                   |
| Index colonoscopy using high-adenoma-detecting technologies (variants: HD scope, chromoendoscopy)                                               | no high-adenoma-detecting technologies                                                           |



In addition to assessing the evidence from electronic database searching, evidence reported in existing guideline documents, which met the inclusion criteria, were checked for inclusion in the review (Cairns et al., 2010; Atkin 2002; Hassan 2013).

### **Quality assessment**

After identifying eligible studies for inclusion, methodological quality of the studies was assessed using the QUIPS tool for studies of prognostic factors, and a Cochrane risk of bias tool for non-randomised studies (ROBINS) of interventions, where applicable.

### **Data extraction**

Data were extracted into a piloted data extraction form by one reviewer and checked by a second reviewer. Information on study characteristics and methods, participant characteristics, interventions and comparators evaluated, and clinical outcomes was extracted.

### **Synthesis**

A narrative synthesis of included studies was undertaken, including tabulation of relevant study information and a GRADE assessment of the evidence.

## **3. Results**

### **Bibliographic searches**

After removing duplicates, 5334 articles were found. No systematic reviews were found as potentially relevant. 198 citations were considered potentially relevant and acquired in full text. In total 30 studies (relating to 39 citations) were included at full text sift across questions 1 - 7. 29 studies (relating to 37 citations) were identified from electronic database searching from 2007. An additional study (relating to 2 citations) were included from the previous guidelines (Atkin, 2002; Cairns, 2010). (See Figure 1. PRISMA flow chart). 161 studies were excluded because they did not meet the inclusion criteria (see appendix 3 for a list of excluded studies with reasons for their exclusion).



Figure 1. PRISMA Flow Diagram

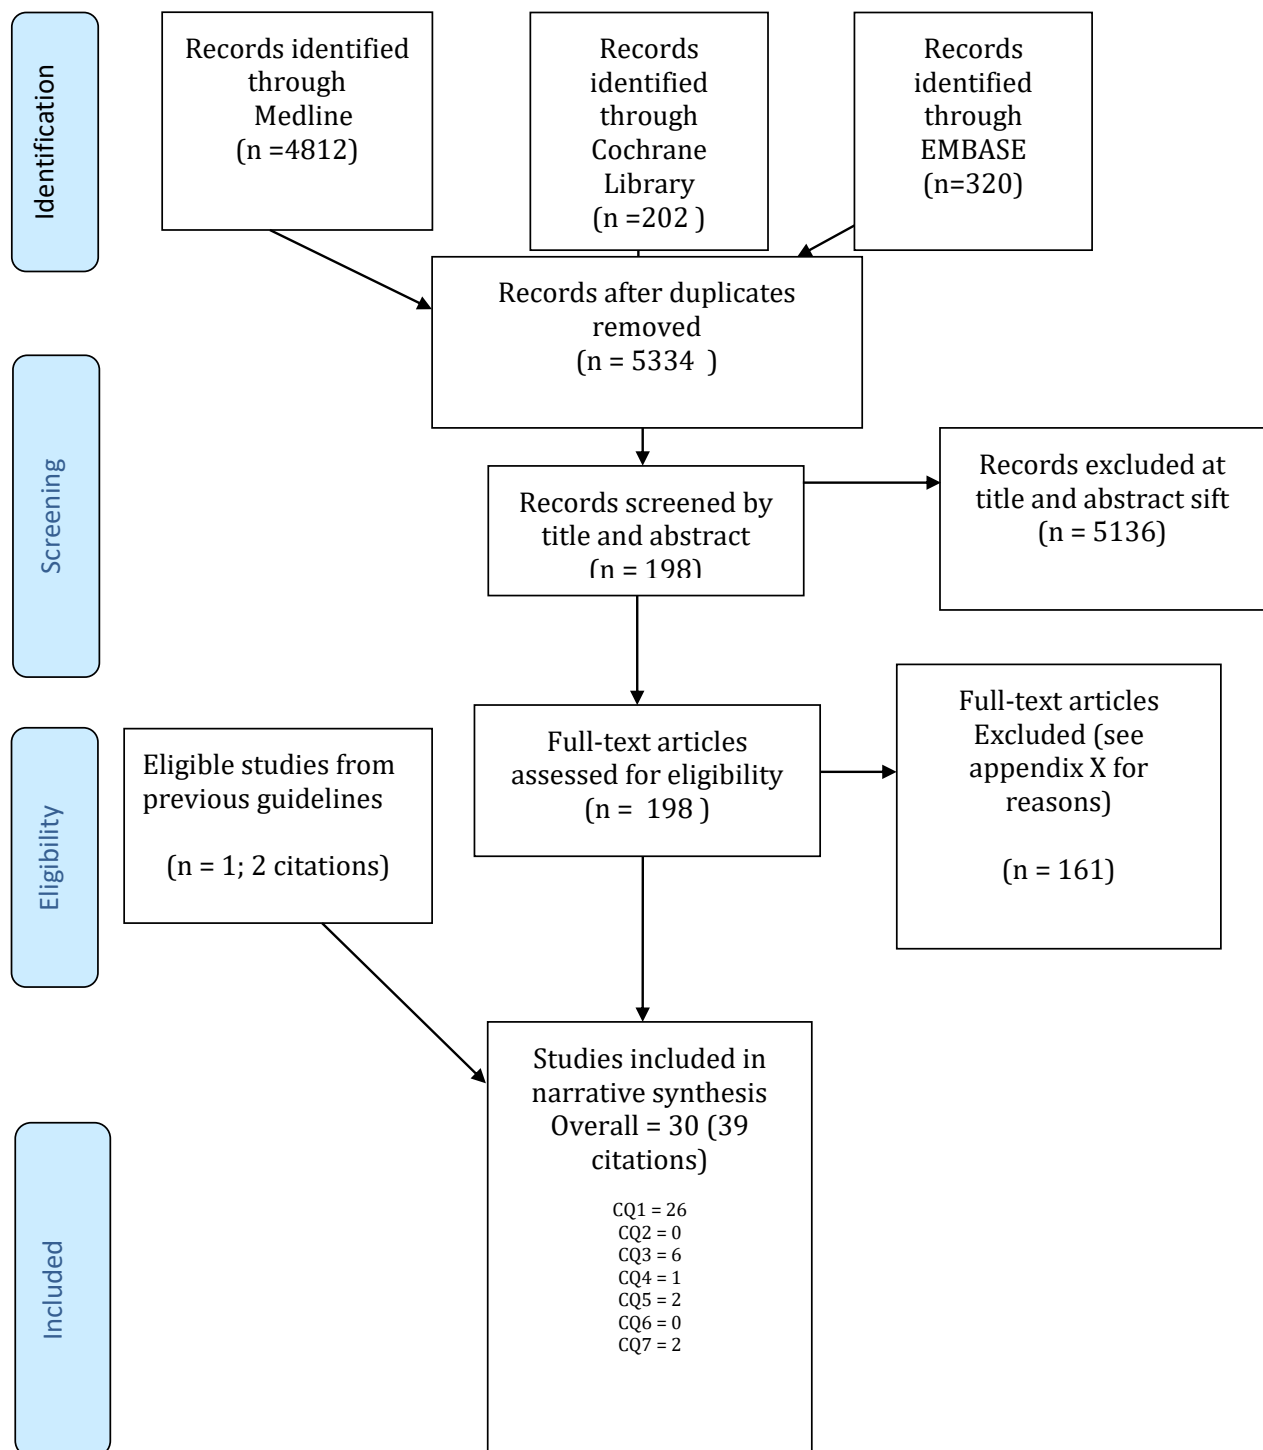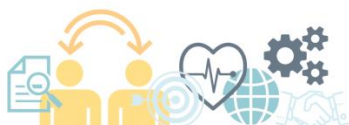



### Study characteristics

Of the 30 studies included at full text, 26 provided evidence for CQ1, no studies provided evidence for CQ2, 6 studies provided evidence for CQ3; 1 study provided evidence for CQ4; 2 studies provided evidence for CQ5; no studies provided evidence for CQ6; and 2 studies provided evidence for CQ7. All except one study (an RCT; Winawer 1993) were observational studies. Details of the study characteristics are presented in table 3.

**Table 3 Study characteristics of the included studies.**

| First author, year | Study design and Aims and objectives                                                                                                                                                                                                                                                                                                                                                        | End points and Statistical model                                                                                                     | Patient inclusion criteria                                                                                                                                                                                                                            | F/U [planned surveillance intervals]                                                                                                                                                           | Definition of AA                                                                                               | Summary of findings                                                                                                                                                                                                                                                                                                                       |
|--------------------|---------------------------------------------------------------------------------------------------------------------------------------------------------------------------------------------------------------------------------------------------------------------------------------------------------------------------------------------------------------------------------------------|--------------------------------------------------------------------------------------------------------------------------------------|-------------------------------------------------------------------------------------------------------------------------------------------------------------------------------------------------------------------------------------------------------|------------------------------------------------------------------------------------------------------------------------------------------------------------------------------------------------|----------------------------------------------------------------------------------------------------------------|-------------------------------------------------------------------------------------------------------------------------------------------------------------------------------------------------------------------------------------------------------------------------------------------------------------------------------------------|
| Atkin 2017a&b      | Retrospective cohort - To estimate CRC incidence after baseline colonoscopy in patients who are recommended 3-yearly surveillance, and assess the effect of surveillance on CRC incidence. The hypothesis was that a subgroup of patients exists in whom surveillance colonoscopy could be stopped earlier, or for whom surveillance is not necessary, on the basis of their CRC incidence. | AA<br>CRC incidence at next surveillance<br>Long term CRC incidence<br><br>Cox proportional hazards models                           | Patients were eligible for inclusion in the study if they had a baseline colonoscopy and newly diagnosed intermediate-risk adenomas according to UK guidelines, defined as one-to-two large ( $\geq 10$ mm) adenomas, or three to four small adenomas | Median follow up time 7.9 years, (IQR 5.6–11.1),                                                                                                                                               | Advanced adenoma was defined as an adenoma of $\geq 10$ mm, or with villous or tubulovillous histology, or HGD | Surveillance was associated with a substantially reduced incidence of CRC in intermediate-risk patients. First surveillance seemed to confer the most benefit and was associated with a significantly reduced CRC incidence rate compared with no surveillance; this reduction was maintained in patients who attended subsequent visits. |
| Chung 2013         | Retrospective cohort study – To evaluate risk factors for the presence of high-risk adenomas at the time of a third colonoscopy based on the findings from two prior colonoscopic examinations, which will help determine optimal colonoscopic intervals                                                                                                                                    | AA<br><br>Cox regression analysis was used to identify clinical covariates predictive of high-risk adenoma at the third colonoscopy. | patients who underwent two consecutive surveillance colonoscopies after an initial polyp removal (size $\geq 5$ mm and number $\geq 1$ ) at the first colonoscopy                                                                                     | First and second surveillance - The median interval (min-max) between the first and second colonoscopy was 17 (6-101) months, while the median interval (min-max) between the second and third | AA was defined as an adenoma of diameter $\geq 10$ mm or a villous component or HGD.                           | Patients with high risk adenoma at the first and/or second colonoscopy had increased risk of recurrent high risk adenoma at second surveillance than the patients without high-risk adenoma at the first and second colonoscopy.                                                                                                          |



| First author, year | Study design and Aims and objectives                                                                                                                                                                                                                                                                                                                    | End points and Statistical model                                                                                                                                                                                                                                                                                       | Patient inclusion criteria                                                                                                                                                                                                                                    | F/U [planned surveillance intervals]      | Definition of AA                                  | Summary of findings                                                                                                                                                                                                                                                                                                                                                                                                                                                                                                                                                                                                                                                                                                                                                             |
|--------------------|---------------------------------------------------------------------------------------------------------------------------------------------------------------------------------------------------------------------------------------------------------------------------------------------------------------------------------------------------------|------------------------------------------------------------------------------------------------------------------------------------------------------------------------------------------------------------------------------------------------------------------------------------------------------------------------|---------------------------------------------------------------------------------------------------------------------------------------------------------------------------------------------------------------------------------------------------------------|-------------------------------------------|---------------------------------------------------|---------------------------------------------------------------------------------------------------------------------------------------------------------------------------------------------------------------------------------------------------------------------------------------------------------------------------------------------------------------------------------------------------------------------------------------------------------------------------------------------------------------------------------------------------------------------------------------------------------------------------------------------------------------------------------------------------------------------------------------------------------------------------------|
|                    |                                                                                                                                                                                                                                                                                                                                                         |                                                                                                                                                                                                                                                                                                                        |                                                                                                                                                                                                                                                               | colonoscopy was 24 (6-90) months.         |                                                   |                                                                                                                                                                                                                                                                                                                                                                                                                                                                                                                                                                                                                                                                                                                                                                                 |
| Chung 2011         | Prospective cohort - The aim of this large-scale prospective study was to (1) estimate the 5-year cumulative incidence of advanced adenoma and compare differences among risk categories inherent to the guidelines and (2) determine whether purported risk factors for occurrence of colorectal neoplasia would also be predictive of its recurrence. | AA<br>N and % only                                                                                                                                                                                                                                                                                                     | Asymptomatic undergoing first time screening colonoscopy with complete clearing at every examination                                                                                                                                                          | FS SS - FS <3years vs 3-5years            | AA diameter ≥10 mm or a villous component or HGD. | For the 5-year incidence of advanced adenoma, the high-risk group exhibited a significantly higher rate of 12.2% as compared with rates of 2.0% for the normal group and 2.4% for the low-risk group. Among subjects in the low-risk group, 355 (52.9%) underwent their first surveillance within <3 years. Rates of advanced adenoma were similar irrespective of the timing of the first surveillance (1.7% at <3 years vs 2.2% at 3e5 years, p¼0.11). Almost all subjects in the high-risk group underwent their first surveillance within 3 years and the majority of them underwent repeat examinations. Notably, most advanced adenomas in the high-risk group were detected within <3 years, with 1-, 2- and 3-year cumulative rates of 4.6, 7.4 and 9.6%, respectively. |
| Coleman 2015       | Retrospective cohort study / with nested case control study - The aim of this investigation was to quantify colorectal cancer risk following polypectomy of adenomas in a large population based study.                                                                                                                                                 | CRC incidence at next surveillance<br><br>Cox proportional hazards models to investigate the association between CRC risk and demographics or incident polyp characteristics. Standardized colorectal cancer incidence ratios (SIR) were analysed per 100,000 population, and separately for males and females. Models | Cohort study - Patients in an adenoma register.<br>Nested case-control study - Patients who developed CRC at least 6 months post-incident polyp diagnosis. Controls were matched 1:1 to CRC cases by age (1 year), sex, year of incident polyp diagnosis, and | Study conducted over a 6 year time period | NA                                                | Colorectal cancer risk was elevated in individuals following polypectomy for adenoma, outside of screening programmes.                                                                                                                                                                                                                                                                                                                                                                                                                                                                                                                                                                                                                                                          |



| First author, year | Study design and Aims and objectives                                                                                                                                                                                                                                                                                     | End points and Statistical model                                                                                                                                                                                                                                                                                                                                                                                                                                                                                                 | Patient inclusion criteria                                                                                                                                                                                       | F/U [planned surveillance intervals]                                     | Definition of AA                                                                                         | Summary of findings                                                                                                                                                                                                                                                                                                                                                                                                                                                                                                                                                                                                                                                                                                                                                                                   |
|--------------------|--------------------------------------------------------------------------------------------------------------------------------------------------------------------------------------------------------------------------------------------------------------------------------------------------------------------------|----------------------------------------------------------------------------------------------------------------------------------------------------------------------------------------------------------------------------------------------------------------------------------------------------------------------------------------------------------------------------------------------------------------------------------------------------------------------------------------------------------------------------------|------------------------------------------------------------------------------------------------------------------------------------------------------------------------------------------------------------------|--------------------------------------------------------------------------|----------------------------------------------------------------------------------------------------------|-------------------------------------------------------------------------------------------------------------------------------------------------------------------------------------------------------------------------------------------------------------------------------------------------------------------------------------------------------------------------------------------------------------------------------------------------------------------------------------------------------------------------------------------------------------------------------------------------------------------------------------------------------------------------------------------------------------------------------------------------------------------------------------------------------|
|                    |                                                                                                                                                                                                                                                                                                                          | <p>adjusted for age at index, sex, year at index, number of polyps at index, and subsequent adenoma diagnosed.</p> <p>For the nested case-control study, CRC risk was assessed between comparative groups by applying conditional logistic regression analysis to generate odds ratios (OR) and 95% CI.</p>                                                                                                                                                                                                                      | were alive at the time of their matched cases' CRC diagnosis.                                                                                                                                                    |                                                                          |                                                                                                          |                                                                                                                                                                                                                                                                                                                                                                                                                                                                                                                                                                                                                                                                                                                                                                                                       |
| Cottet 2012        | Retrospective cohort study - The aim of this study was to estimate the risk of colorectal cancer in patients with adenoma within the general population followed-up in routine practice, both overall and according to the initial characteristics of the patients and adenomas and to colonoscopic follow-up practices. | <p>AA<br/>CRC incidence at next surveillance</p> <p>The number of person-years (from index to CRC diagnosis) was calculated by sex and 5-year age group. The sex and age-specific colorectal cancer incidence rates in the general population were obtained from the cancer registry. The ratio of observed to expected cases of colorectal cancer was reported as a standardised incidence ratio (SIR). Cumulative colorectal cancer probabilities were calculated using the Kaplan Meier method and expressed with 95% CI.</p> | Patients were identified from the population-based registry of colorectal polyps, and comprised all patients diagnosed for the first time with a colorectal adenoma between 1 January 1990 and 31 December 1999. | FS (all patients had at least one FU) Median FU 7.7 year (IQR -5.2-10.5) | Advanced adenomas were defined as adenomas with a diameter <10 mm and/or a villous component and/or HGD. | <p>The long-term risk of CRC remained higher in patients diagnosed for the first time with adenomas than in the general population. Both initial adenoma features and the conditions of colonoscopic surveillance in routine practice strongly affected the cancer risk. Compared with the general population, the risk of developing CRC after polypectomy only remained high in patients with advanced adenomas and without follow-up colonoscopy.</p> <p>Patients with initial advanced adenomas could largely benefit from colonoscopic surveillance, since the risk of cancer was similar to that in the general population when at least one follow-up colonoscopy was performed. The cancer risk was low in patients with non-advanced adenomas in comparison with the general population.</p> |



| First author, year            | Study design and Aims and objectives                                                                                                                                                                                                                                                                                                                                                                                  | End points and Statistical model                                                                                                                                                                                                                                                                                            | Patient inclusion criteria                                                                                         | F/U [planned surveillance intervals]                                               | Definition of AA                                                                                                                                    | Summary of findings                                                                                                                                                                                                                                        |
|-------------------------------|-----------------------------------------------------------------------------------------------------------------------------------------------------------------------------------------------------------------------------------------------------------------------------------------------------------------------------------------------------------------------------------------------------------------------|-----------------------------------------------------------------------------------------------------------------------------------------------------------------------------------------------------------------------------------------------------------------------------------------------------------------------------|--------------------------------------------------------------------------------------------------------------------|------------------------------------------------------------------------------------|-----------------------------------------------------------------------------------------------------------------------------------------------------|------------------------------------------------------------------------------------------------------------------------------------------------------------------------------------------------------------------------------------------------------------|
| Cubiella 2016                 | Retrospective cohort study – To determine whether there are differences in the incidence of advanced neoplasia and CRC detection at the first surveillance between the two risks groups at 3 year interval.                                                                                                                                                                                                           | Advanced Neoplasia (AN) (AA+CRC)<br><br>Multivariate logistic regression.                                                                                                                                                                                                                                                   | Two groups – screening patients who met criteria for an intermediate group and high risk group.                    | 1st surv after 2.8 (1.8) years for 65% of the study population.                    | NA                                                                                                                                                  | Variables independently associated with the risk of AN at fist surveillance were more than 5 adenomas, villous histology and HGD.                                                                                                                          |
| Emilsson 2017 (& Loberg 2014) | Retrospective cohort study – To evaluate CRC mortality in a large, population-based cohort with virtually complete follow-up for death from colorectal cancer. (Loberg)<br><br>To assess the generalisability of our Norwegian study (Loberg), we took advantage of a large, independent cohort from Sweden, with the aim of providing reliable estimates for the risk of CRC death after adenoma removal. (Emilsson) | Long term CRC mortality<br><br>Compared the observed mortality in the adenoma cohort with rates in the general population. Data on all patients in whom CRC was diagnosed were retrieved from the Cancer Registry, including age at the time of diagnosis, date of diagnosis, cancer location, and date and cause of death. | Cancer Registry for all patients who were 40 years of age or older and had at least one colorectal adenoma removed | The median follow-up was 7.2 years                                                 | N/A                                                                                                                                                 | The mortality rates for adenoma patients are low and are similar in Norway and Sweden and accordingly the differences in standardised mortality ratios reflect the different baseline risk in the two countries.                                           |
| Facciorusso 2016a b           | Retrospective cohort – The aim of this study was to develop and validate an easy to use numeric score point able to accurately predict ACA recurrence after colon polypectomy.                                                                                                                                                                                                                                        | AA<br><br>Unadjusted and adjusted: grade; size; number ACAs                                                                                                                                                                                                                                                                 | All had advanced adenoma at baseline with complete adenoma resection, and complete follow-up data.                 | FS - 3 years                                                                       | ACAs were identified according to Paris classification as: polypoid pedunculated type (0-1p), sessile (0-1s), non-polypoid (0-IIa, 0-IIb and 0-IIc) | ACAs >15mm representing HGD at pathologic examination are at higher risk and might benefit from more intensive surveillance. Single lesions +/-15mm without HGD show a very low risk of recurrence and could be considered for longer follow up intervals. |
| Fairley 2014                  | Retrospective cohort – To estimate the strength of associations between baseline adenoma attributes                                                                                                                                                                                                                                                                                                                   | AA<br>CRC incidence at next surveillance                                                                                                                                                                                                                                                                                    | Patients with adenomas removed at screening colonoscopy .                                                          | FS+ (all patients had one or more screening / surveillance colonoscopies (Time NR) | Advanced adenoma: adenoma with +/- 1 risk attributes. Risk attributes were defined at namely                                                        | The results emphasise the need to mitigate excessive risk by performing timely surveillance colonoscopies in patients with                                                                                                                                 |



| First author, year | Study design and Aims and objectives                                                                                                                                                                                                                                                                                                                          | End points and Statistical model                                                                                                                                                                                                     | Patient inclusion criteria                                                                                                                                                                                                                                                  | F/U [planned surveillance intervals]                                                                     | Definition of AA                                                                                                                                | Summary of findings                                                                                                                                                                                                                                                                                                                                                                      |
|--------------------|---------------------------------------------------------------------------------------------------------------------------------------------------------------------------------------------------------------------------------------------------------------------------------------------------------------------------------------------------------------|--------------------------------------------------------------------------------------------------------------------------------------------------------------------------------------------------------------------------------------|-----------------------------------------------------------------------------------------------------------------------------------------------------------------------------------------------------------------------------------------------------------------------------|----------------------------------------------------------------------------------------------------------|-------------------------------------------------------------------------------------------------------------------------------------------------|------------------------------------------------------------------------------------------------------------------------------------------------------------------------------------------------------------------------------------------------------------------------------------------------------------------------------------------------------------------------------------------|
|                    | and the risk of adenoma recurrence and invasive CRC.                                                                                                                                                                                                                                                                                                          | Multivariate logistic regression, adjusting for sex, smoking status, family history (of CRC), and age (age at diagnosis of recurrent adenoma or CRC, or age at the end of follow-up for patients who did not have these outcomes.    |                                                                                                                                                                                                                                                                             |                                                                                                          | the number (+/-3) and size (+/-10 mm) of adenomas, and the presence of HGD or villous morphology.                                               | baseline adenomas displaying high-risk attributes.                                                                                                                                                                                                                                                                                                                                       |
| Huang 2012         | Retrospective cohort - To assess 5-year risk of colorectal neoplasia after normal colonoscopy in asymptomatic Chinese Mongolian over 50 years of age                                                                                                                                                                                                          | AA<br><br>Multiple logistic regressions.                                                                                                                                                                                             | All patients who had undergone colonoscopic removal of adenomas and received colonoscopic surveillance within 5 years.(sub cohort)                                                                                                                                          | FS- 5 years                                                                                              | A tubular adenoma 10mm or larger in diameter, villous or tubulovillous adenoma, or any adenoma with HGD.                                        | The results provide support for follow-up colonoscopy of at least 5 years for entire cohort (which includes those who had no baseline adenoma – data not extracted)                                                                                                                                                                                                                      |
| Huang 2010         | Retrospective cohort – To analyse the actual recurrence rate of adenoma and advanced adenoma in a Chinese patient population with adenoma on the initial colonoscopy and assess the relationship between the characteristics of baseline adenoma and the recurrence of adenoma. Also estimated possible colonoscopy surveillance intervals after polypectomy. | AA<br><br>Cox proportional hazard model to assess the relative risk of recurrence of advanced adenoma based on size, presence of villous, and number of baseline adenomas and to control for the age and sex of the patient.         | Colorectal adenoma removed by colonoscopy , complete colonoscopy was performed at every examination; at least one surveillance colonoscopy was performed within 6 months after the initial colonoscopy, with the aim of removing missed adenomas; follow up data available. | Patients underwent more than one surveillance colonoscopy within 1-20 years of the baseline examination. | One or more of the following features: a tubular adenoma 10 mm or larger in diameter, villous or tubulovillous adenoma, or the presence of HGD. | The recurrence rate of advanced adenoma in various surveillance intervals was higher among patients with advanced adenomas at baseline than in those with non-advanced adenomas at baseline. The recurrence of any adenoma and advanced adenoma was associated with the size, number, and histological features of the baseline adenoma as well as with the age and sex of the patients. |
| Huang 2012a        | Retrospective cohort - To evaluate the risk and cause of ICC in patients with adenoma within 5 years after polypectomy and to provide some beneficial information for improvement of the current colonoscopic surveillance strategies.                                                                                                                        | Interval CRC<br><br>Multivariate logistic regression adjusting for age, sex, stage (advanced or non-advanced), size (<10mm/≥ 10mm, pathology (tubular vs tubulovillus and villous adenoma), dysplasia and number of adenomas (<2/≥3) | Colorectal adenoma removed by colonoscopy , complete colonoscopy was performed at every examination, patients had to have had a surveillance colonoscopy within 5 years.                                                                                                    | FS at least one surveillance mean 2.67 years                                                             | One or more of the following features: a tubular adenoma 10 mm or larger in diameter, villous or tubulovillous adenoma, or the presence of HGD. | Among patients undergoing surveillance colonoscopy within 5 years after polypectomy the incidence density of ICC was 2.9 cases per 1000 person years. The majority of interval cancers originated from incomplete resection and AA and missed cancers. Age >60 yrs, presence of villous and HGD sig                                                                                      |



| First author, year                                                                       | Study design and Aims and objectives                                                                                                                                                                                                                  | End points and Statistical model                                                                                                                                                                                                               | Patient inclusion criteria                                                                                                                                                                                                                                       | F/U [planned surveillance intervals]                                                    | Definition of AA                                                                         | Summary of findings                                                                                                                                                                                                                                                                                                                                                                                 |
|------------------------------------------------------------------------------------------|-------------------------------------------------------------------------------------------------------------------------------------------------------------------------------------------------------------------------------------------------------|------------------------------------------------------------------------------------------------------------------------------------------------------------------------------------------------------------------------------------------------|------------------------------------------------------------------------------------------------------------------------------------------------------------------------------------------------------------------------------------------------------------------|-----------------------------------------------------------------------------------------|------------------------------------------------------------------------------------------|-----------------------------------------------------------------------------------------------------------------------------------------------------------------------------------------------------------------------------------------------------------------------------------------------------------------------------------------------------------------------------------------------------|
|                                                                                          |                                                                                                                                                                                                                                                       |                                                                                                                                                                                                                                                |                                                                                                                                                                                                                                                                  |                                                                                         |                                                                                          | associated with ICC on surveillance colonoscopy.                                                                                                                                                                                                                                                                                                                                                    |
| Jang 2015                                                                                | Retrospective cohort - To evaluate risk factors related to recurrent high-risk polyps                                                                                                                                                                 | AA (referred to as high risk polyps)                                                                                                                                                                                                           | Of patients who were found to have polyps at first colonoscopy, clinical data from consecutive patients with high-risk polyps was collected retrospectively.                                                                                                     | FS Surveillance colonoscopy performed within more than 1 year of the index colonoscopy. | High-risk polyps defined as adenoma $\geq 10$ mm, $\geq 20\%$ villous histology, or HGD. | Male patients and those with poor bowel preparation for colonoscopy or higher numbers of adenomas were more likely to experience recurrent high-risk polyps.                                                                                                                                                                                                                                        |
| Jung 2016                                                                                | Retrospective cohort study – to compare the risk for advanced colorectal neoplasia recurrence according to the number of high risk findings at the index colonoscopy.                                                                                 | Advanced Neoplasia (AA+CRC)<br><br>Cox proportional hazards.                                                                                                                                                                                   | Patients who had one or more high risk adenomas at index (all adenomas removed at index) and underwent follow up 2.5 or more years after index.                                                                                                                  | FS: HRF $\geq 3$ : 4.0 years (range 2.5-11); HRF $\leq 2$ : 4.1 years (range 2.5-10.9)  | NA                                                                                       | A 3 year surveillance interval for patient with multiple high risk findings appears reasonable.                                                                                                                                                                                                                                                                                                     |
| Laish 2017                                                                               | Retrospective cohort - To stratify the risk for advanced adenoma and CRC based on both pathology and polyp size at baseline colonoscopy                                                                                                               | AA<br><br>Multivariate analysis performed by development of backwards logistic regression model.                                                                                                                                               | All adult patients above the age of 18 who had a documented neoplasia at baseline colonoscopy and a surveillance colonoscopy.                                                                                                                                    | FS Interval between procedures was at least 1 year and less than 5 years                | Advanced tubular adenoma (either $>10$ mm or with HGD histology).                        | The size of the polyp and the number of advanced lesions are more important than its histology for predicting the risk of high-risk metachronous lesions at follow-up.                                                                                                                                                                                                                              |
| Laiyamo 2008; Laiyamo 2011; Laiyamo 2012; Laiyamo 2013; Leung 2010 (only follow up data) | Prospective study – Polyp Prevention Trial - To measure the ability of adenoma characteristics at baseline to predict subsequent advanced adenoma recurrence within 4 years. To examine the rate of interval CRC in the PPT continued follow-up study | AA<br>Long term CRC incidence<br><br>Log-binomial modelling . Age, sex, BMI, nonsteroidal anti-inflammatory drug use, adenoma characteristics (location, size, HGD. and villous component), family history of CRC adjusted for in multivariate | Patients completing the PPT trial by having end point colonoscopy. Inclusion in PPT was patients aged 35 or older who had at least 1 histologically confirmed adenoma removed during a screening or diagnostic colonoscopy within 6 months of random assignment. | At 4 years; (and follow up data 6.2 years after the end of the PPT for CRC incidence)   | adenomas $\geq 1$ cm in diameter or with a villous histology or HGD.                     | Missed lesions are more likely to be in the proximal colon. Recurrent adenomas and advanced adenomas are more likely to be in the proximal colon. Risk of adenoma recurrence increases with increased body size, but short-term weight change over 4 years does not affect risk of adenoma recurrence. Advancing age was associated with an increased risk of proximal advanced adenoma recurrence. |
| Lee 2017                                                                                 | Retrospective cohort - To estimate the risk of metachronous neoplasia and                                                                                                                                                                             | AA                                                                                                                                                                                                                                             | Patients who underwent complete colonoscopic polypectomies and after                                                                                                                                                                                             | FS at 3 or 5 years (comparison)                                                         | HRA was defined as advanced adenoma, $\geq 10$ mm in diameter,                           | Patients had a surveillance colonoscopy before the recommended guidelines                                                                                                                                                                                                                                                                                                                           |



| First author, year | Study design and Aims and objectives                                                                                                                                                                                                                                                             | End points and Statistical model                                                                                                                                                                                                        | Patient inclusion criteria                                                                                                                                                                                                                                                                                                                                         | F/U [planned surveillance intervals]                                                                                                       | Definition of AA                                                                                                                             | Summary of findings                                                                                                                                                                                                                                         |
|--------------------|--------------------------------------------------------------------------------------------------------------------------------------------------------------------------------------------------------------------------------------------------------------------------------------------------|-----------------------------------------------------------------------------------------------------------------------------------------------------------------------------------------------------------------------------------------|--------------------------------------------------------------------------------------------------------------------------------------------------------------------------------------------------------------------------------------------------------------------------------------------------------------------------------------------------------------------|--------------------------------------------------------------------------------------------------------------------------------------------|----------------------------------------------------------------------------------------------------------------------------------------------|-------------------------------------------------------------------------------------------------------------------------------------------------------------------------------------------------------------------------------------------------------------|
|                    | optimal surveillance interval in the Korean population.                                                                                                                                                                                                                                          | Logistic regression analysis, adjusted for age, male sex, smoking, multiple adenomas, large adenoma, and 3-year surveillance interval.                                                                                                  | index colonoscopy, underwent one or more surveillance colonoscopies.                                                                                                                                                                                                                                                                                               |                                                                                                                                            | containing >25% villous structure or HGD, or three or more adenomas.                                                                         | despite a low risk of metachronous neoplasia. However, the risk of metachronous advanced adenoma was increased in elderly patients and those with a 3 or more year surveillance interval.                                                                   |
| Lee 2013           | Retrospective cohort - To describe the findings at 12-month surveillance colonoscopy in high risk individuals and to identify baseline patient and clinical characteristics that may predict the risk of having AA or CRC at surveillance.                                                       | Advanced Neoplasia (AA+CRC)<br>MV logistic regression model                                                                                                                                                                             | individuals who were assigned to the high-risk group as a result of the baseline screening                                                                                                                                                                                                                                                                         | FS - 1 year<br>he mean interval between the first colonoscopy in the screening episode and surveillance colonoscopy was 387 (SD = 89) days | NA                                                                                                                                           | Patients at high risk of future neoplasia, had an incidence at 12 months of 0.8% for CRC and 6.1% for advanced adenomas.<br><br>12-month surveillance in high-risk group of patients is recommended.                                                        |
| Martinez 2009      | Pooled analysis of 8 retrospective studies - To estimate absolute risks of metachronous advanced adenoma, CRC, and their combination (advanced colorectal neoplasia) and to identify patient characteristics and adenoma features that are independently associated with risk of these outcomes. | Advanced Neoplasia (AA+CRC)<br>-<br>Logistic regressions, adjusting for study, age, sex, race, smoking status, BMI, family history of CRC, history of polyp or adenoma prior to baseline examination, baseline adenoma characteristics. | Studies including >800 participants; protocol requiring complete baseline colonoscopy with removal of one or more adenomas and removal of all visualised lesions; specified schedule of surveillance follow-up colonoscopies; availability of end-point data regarding the number, size, and histopathology of adenomas and CRC detected at follow-up examination. | Median follow-up was 47.2 months, range 36.9 to 59.0                                                                                       | NA                                                                                                                                           | Development of metachronous advanced colorectal neoplasia was associated with the number, size, location, and histological features of prior adenomas, as well as age and sex of patients.                                                                  |
| Miller 2010        | Retrospective cohort - To provide descriptive statistics to help define the risk of identifying advanced neoplasia or any neoplasia on follow-up colonoscopies in a patient who has had 1-2 small tubular adenomas removed on colonoscopy.                                                       | AA<br>Primary outcome, presence of an advanced adenoma or any adenoma on 3rd procedure.                                                                                                                                                 | Patients aged 49 or older who had at least 3 colonoscopies each at least 11 months apart. Inclusion required that the first of 3 colonoscopies be a complete colonoscopy to the cecum performed as an outpatient with the identification and                                                                                                                       | FS SS subsequent - Median time between Index and FS 32.6m (range 11-78) and between 2nd and 3rd 37.6m(range 11-102m).                      | An advanced adenoma was defined as any adenoma greater than or equal to 1 cm or any adenoma with tubulo-villous or villous histology or HGD. | There is a high percentage of patients who have adenomatous polyps on follow-up colonoscopies even after two low risk colonoscopies. After having two low risk colonoscopies (i.e. two or fewer small tubular adenomas), 30% of patients were found to have |



| First author, year                 | Study design and Aims and objectives                                                                                                                                                                                                                                        | End points and Statistical model                                                                                                                                                                                                                                                     | Patient inclusion criteria                                                                                                                                                                                                                                                                                                                                   | F/U [planned surveillance intervals]                                                                                                                                                                                                          | Definition of AA                                                                                                                     | Summary of findings                                                                                                                                                                                                                                                                                                                                                                                                                                                                                                                                              |
|------------------------------------|-----------------------------------------------------------------------------------------------------------------------------------------------------------------------------------------------------------------------------------------------------------------------------|--------------------------------------------------------------------------------------------------------------------------------------------------------------------------------------------------------------------------------------------------------------------------------------|--------------------------------------------------------------------------------------------------------------------------------------------------------------------------------------------------------------------------------------------------------------------------------------------------------------------------------------------------------------|-----------------------------------------------------------------------------------------------------------------------------------------------------------------------------------------------------------------------------------------------|--------------------------------------------------------------------------------------------------------------------------------------|------------------------------------------------------------------------------------------------------------------------------------------------------------------------------------------------------------------------------------------------------------------------------------------------------------------------------------------------------------------------------------------------------------------------------------------------------------------------------------------------------------------------------------------------------------------|
|                                    |                                                                                                                                                                                                                                                                             |                                                                                                                                                                                                                                                                                      | removal of 1 or 2 small tubular adenomas without tubulo-villous or villous histology or HGD.                                                                                                                                                                                                                                                                 |                                                                                                                                                                                                                                               |                                                                                                                                      | adenomatous polyps within approximately 3 years after their most recent colonoscopy, and 2.4% had advanced adenomas.                                                                                                                                                                                                                                                                                                                                                                                                                                             |
| Morelli 2013 (and Imperiale, 2014) | Retrospective cohort - To quantify the yield of advanced colorectal findings (high risk findings, advanced adenoma on the second surveillance colonoscopy based on finding from the index and first surveillance colonoscopies using data generated from clinical practice. | AA (High risk findings, defined as an advanced adenoma).<br><br>Multivariable logistic regression models were used to examine the association of age, sex, and findings on a previous colonoscopy with the likelihood of advanced adenoma on the subsequent surveillance colonoscopy | Eligible for study inclusion were patients with a history of neoplastic polyps (tubular adenomas, tubulovillous adenomas, and villous adenomas) on an index colonoscopy, which could have been done for any indication except for surveillance for previous adenomatous polyps or CRC. Patients had to have undergone at least 2 surveillance colonoscopies. | FS SS - The overall mean (median) SD interval between index and first surveillance colonoscopies was 33.9 (36.3) 20.2. overall mean (median) SD interval between the first and second surveillance colonoscopies was 44.1 (38.5) 18.6 months. | AA = a tubular adenoma 10 mm or larger in diameter, villous or tubulovillous adenoma, or the presence of HGD. Or three or more NAAs. | The risk of high risk findings on the second surveillance was found to be most dependent on whether high risk findings were present on the first surveillance and less so on the index. Patients with high risk findings on the index and first surveillance or on the first surveillance alone have a high subsequent risk of high risk findings. Patients with low risk or non AA on the index and first surveillance, a surveillance interval longer than 5 years may be considered, due to the low subsequent risk of advanced neoplasia in these subgroups. |
| Nusko 2008                         | Prospective cohort study - To identify differences between initial adenomas and metachronous lesions detected during a large series of subsequent follow-up examinations in order to evaluate the effect of long-term surveillance                                          | AA<br><br>Relative risk (RR) for the development of metachronous adenomas of advanced pathology.                                                                                                                                                                                     | Patients with adenomas at the initial examination and had at least one surveillance.                                                                                                                                                                                                                                                                         | FS SS + Patients who had only single initial adenomas were re-examined at 4-year, those with multiple adenomas at 2-year, intervals. All patients had at least one follow up.                                                                 | Adenoma of advanced pathology was defined as large ( $\geq 10$ mm) or tubulovillous or villous or an adenoma bearing HGD.            | Patients who had, at baseline, large adenomas or tubulovillous or villous adenomas or multiple adenomas have a significantly higher risk for those lesions also at follow up.                                                                                                                                                                                                                                                                                                                                                                                    |
| Park 2016                          | Retrospective cohort study - To investigate the risk of developing advanced colorectal neoplasm in young patients after removing high-risk adenoma detected at                                                                                                              | Advanced Neoplasia (AA+CRC)<br><br>Cox proportional hazard regression analysis after adjusting for potentially confounding variables to assess                                                                                                                                       | Patients with high-risk adenoma detected at index colonoscopy and who underwent colonoscopy at the last follow-up $\geq 2.5$ years after index colonoscopy were included.                                                                                                                                                                                    | Mean time to the last colonoscopic surveillance was about 4 years. Groups 1, 2, and 3 ( $4.1 \pm 1.4$ , $4.0 \pm 1.4$ , and $4.0 \pm 1.5$ , respectively).                                                                                    | advanced colorectal neoplasm was defined as cancer or advanced adenoma.                                                              | Age is a significant risk factor for developing overall and advanced colorectal neoplasms after removing high-risk adenoma detected at index colonoscopy                                                                                                                                                                                                                                                                                                                                                                                                         |





| First author, year | Study design and Aims and objectives                                                                                                                                                                                                             | End points and Statistical model                                                                                                                     | Patient inclusion criteria                                                                                                                                                                                                                                                                                                       | F/U [planned surveillance intervals]                                                                                                                                                                          | Definition of AA                                                            | Summary of findings                                                                                                                                                                                                                                                                                                                                                                                                                                                                                                                                         |
|--------------------|--------------------------------------------------------------------------------------------------------------------------------------------------------------------------------------------------------------------------------------------------|------------------------------------------------------------------------------------------------------------------------------------------------------|----------------------------------------------------------------------------------------------------------------------------------------------------------------------------------------------------------------------------------------------------------------------------------------------------------------------------------|---------------------------------------------------------------------------------------------------------------------------------------------------------------------------------------------------------------|-----------------------------------------------------------------------------|-------------------------------------------------------------------------------------------------------------------------------------------------------------------------------------------------------------------------------------------------------------------------------------------------------------------------------------------------------------------------------------------------------------------------------------------------------------------------------------------------------------------------------------------------------------|
|                    | index colonoscopy compared with that in older patients                                                                                                                                                                                           | risk factors of developing colorectal neoplasm.                                                                                                      |                                                                                                                                                                                                                                                                                                                                  |                                                                                                                                                                                                               |                                                                             |                                                                                                                                                                                                                                                                                                                                                                                                                                                                                                                                                             |
| Pinsky 2009        | Retrospective cohort study (SCU) nested in the Prostate, Lung, Colorectal and Ovarian (PLCO) Cancer Screening trial - To obtain information about the utilisation of and the findings from surveillance colonoscopy after a baseline colonoscopy | AA (and any adenoma)<br><br>Multivariate model controlled for time to surveillance, sex, family history of CRC, aspirin use, age and smoking status. | All screening arm PLCO subjects randomised before January 1, 2000 and presumed alive on January 5, 2005, with no cancer diagnosis and who had a positive baseline FSG screen with a follow-up (baseline) colonoscopy within 18 months and                                                                                        | Mean times from baseline colonoscopy to FS Advanced adenoma at baseline, 3.4 years, Non-advanced adenoma at baseline, 4.3 years Non-adenomatous polyp at baseline, 4.5 years, No polyp at baseline, 4.7 years | adenoma, $\geq 10$ mm, villous or tubulovillous or showing severe dysplasia | Time interval from baseline to first colonoscopy had virtually no effect on the rate of adenoma or advanced adenoma at FS. Location of the initial adenoma, and male sex were associated with adenoma recurrence.                                                                                                                                                                                                                                                                                                                                           |
| Solakoglu 2017     | Prospective cohort study - To determine the predictive value of 3-year recurrence adenoma characteristics at baseline conventional colonoscopy in patients with high-risk adenoma                                                                | AA<br><br>Logistic regression                                                                                                                        | Patients with a first-time diagnosis of at least one histologically confirmed adenoma, which was removed during the diagnostic complete colonoscopy, and over 20 years of age; High-risk patients were defined as having tubular adenomas $\geq 10$ mm, 3 or more adenomas, adenomas with at least 20% villous elements, or HGD. | FS-3 years                                                                                                                                                                                                    | AA: diameter $\geq 10$ mm or a villous component or HGD.                    | There was no association between adenoma recurrence and age or sex in patients with high-risk adenoma. In addition, initial adenoma features (size: $\geq 1$ cm, number: $\geq 3$ , location and villous component, and /or HGD) were not associated with adenoma / AA recurrence at the 3-year follow-up colonoscopy in patients with high risk adenoma. AA detected at the initial colonoscopy was also not a determinant of adenoma recurrence. AA should be monitored in shorter intervals independently for the component that makes an adenoma an AA. |
| Tae 2017           | Retrospective cohort study - To determine whether index obesity is associated with metachronous CRA in terms                                                                                                                                     | AA<br><br>Logistic multivariate analyses - In all statistical models, we                                                                             | Patients who underwent an index colonoscopy, who subsequently underwent at least one or more                                                                                                                                                                                                                                     | Mean follow up period 3 years, patients underwent 1.3                                                                                                                                                         | Any polyp with one or more of the following features: $\geq$                | This study demonstrated a dose-dependent association between index BMI and the multiplicity of metachronous                                                                                                                                                                                                                                                                                                                                                                                                                                                 |



| First author, year            | Study design and Aims and objectives                                                                                                                                                                                                              | End points and Statistical model                                                                                                                                                        | Patient inclusion criteria                                                                                                                                                                                    | F/U [planned surveillance intervals]                                                                                                                                                                   | Definition of AA                                                                                                                                                                  | Summary of findings                                                                                                                                                                                                                                                                                        |
|-------------------------------|---------------------------------------------------------------------------------------------------------------------------------------------------------------------------------------------------------------------------------------------------|-----------------------------------------------------------------------------------------------------------------------------------------------------------------------------------------|---------------------------------------------------------------------------------------------------------------------------------------------------------------------------------------------------------------|--------------------------------------------------------------------------------------------------------------------------------------------------------------------------------------------------------|-----------------------------------------------------------------------------------------------------------------------------------------------------------------------------------|------------------------------------------------------------------------------------------------------------------------------------------------------------------------------------------------------------------------------------------------------------------------------------------------------------|
|                               | of prevalence, multiplicity, and advanced adenoma on surveillance colonoscopy within 5 years.                                                                                                                                                     | adjusted for age, sex, index BMI status, current smoking, family history of CRC, use of aspirin or NSAID, index colonoscopic findings, follow-up period, and frequency of surveillance. | surveillance colonoscopies whose polyps were removed at the index colonoscopy.                                                                                                                                | surveillance colonoscopies                                                                                                                                                                             | 10 mm, villous histology, or HGD.                                                                                                                                                 | CRAs on surveillance within 5 year age index. This association between BMI and the risk of multiple CRAs persisted in analyse of men but not in women.                                                                                                                                                     |
| Van Enckevort 2014            | Retrospective cohort – To determine predictive factors for the development of adenomas and advanced neoplasia after polypectomy. Based on the results, a proposal for appropriate surveillance intervals is formulated.                           | AA<br>Cox regression analyses.                                                                                                                                                          | 18 years or older and had undergone polypectomy of at least one histologically proven adenoma during a complete colonoscopy.                                                                                  | Median FU period was 85 months (range 9-260). The median number of colonoscopies that had been performed during follow-up was 2 (mean 2.3, range 1-7). Data reported here combines all time intervals. | Adenoma with HGD reported here in the multivariate model. The term AA is used is absolute values for incidence stats, but is different to the definition used in the MV analyses. | Adenoma development after polypectomy occurs in a regular and repetitive way. Our data suggest that only the interval between the initial colonoscopy and the first follow up colonoscopy should be based on initial findings and that subsequent colonoscopies can be planned at predetermined intervals. |
| Van Heijningen 2013           | Retrospective cohort study – To determine independent adenoma-related and colonoscopy related predictors and their associated odds ratios for advance colorectal adenomas during clinical surveillance practice in a large community-based study. | Advanced Neoplasia (AA+CRC)<br>Multivariate logistic regression.                                                                                                                        | Patients undergoing polypectomy and had at least one surveillance                                                                                                                                             | FS Median 24 months (IQR 12-40m)<br>Mean number of surveillances 1.7 (range 1-5)                                                                                                                       | NA                                                                                                                                                                                | A high adenoma number, larger adenoma, villous histology, and proximal location are important independent predictors for AA during surveillance, as is quality of index colonoscopy.                                                                                                                       |
| Vemulapalli 2014              | Retrospective cohort study – To evaluate the effect of using UK guidelines in a US cohort.                                                                                                                                                        | Advanced Neoplasia (AA+CRC)<br>Univariate logistic regression                                                                                                                           | Patients with 1 or more adenomas and a follow up more than 200 days after baseline.                                                                                                                           | FS >200 days and less than 3 years.                                                                                                                                                                    | NA                                                                                                                                                                                | The rate of advanced lesions at first follow up is increased in patients with 3 or more baseline adenomas and at least 1 that is 10mm or larger.                                                                                                                                                           |
| Winawer 1993<br>Winawer 1993a | RCT – To evaluate whether follow-up colonoscopy at three years will detect important colonic lesions as effectively as follow-up at both one and three years.                                                                                     | CRC at next surveillance.                                                                                                                                                               | Patients referred for initial colonoscopy or polypectomy who did not have familial polyposis, inflammatory bowel disease or a person history of polypectomy or CRC, who had a complete colonoscopy to caecum, | 1st - 1&3 vs 3 years follow-up: 3 years (Winnawer 1993); 6 years (Winnawer 1993a)                                                                                                                      | NA                                                                                                                                                                                | Follow-up at 3 years detects important clinical lesions as effectively as follow-up at both one year and three years                                                                                                                                                                                       |



| First author, year | Study design and Aims and objectives | End points and Statistical model | Patient inclusion criteria                                 | F/U [planned surveillance intervals]                                     | Definition of AA | Summary of findings |
|--------------------|--------------------------------------|----------------------------------|------------------------------------------------------------|--------------------------------------------------------------------------|------------------|---------------------|
|                    |                                      |                                  | removal of all polyps, found to have one or more adenomas. | Group A: 2 surveillance: 1 & 3 years<br>Group B: 1 surveillance: 3 years |                  |                     |

AA advanced adenoma; CRC colorectal cancer; AN advanced neoplasia; FS First surveillance; SS Second surveillance; FU follow up; HGD high grade dysplasia

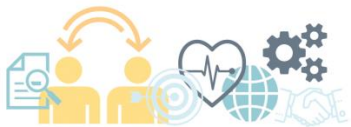

### Study quality

The quality of the included studies was assessed using the Quality In Prognosis Studies tool – QUIPS and Cochrane risk of bias tool for non-randomised studies of interventions ROBINS-I. Table 4 summarizes the decisions made regarding the 6 bias domains. The majority of studies were assessed as having a low risk of bias using these tools, although in a number of studies there were areas of uncertainty, around study participation and how confounding factors were controlled for, giving rise to uncertain risk of bias or high risk of bias in some studies.

**Table 4. Results of the quality assessment of the studies using QUIPS and ROBINS-I**

| Study and date      | 1. Study Participation | 2. Study Attrition | 3. Prognostic Factor Measurement | 4. Outcome Measurement | 5. Study Confounding | 6. Statistical Analysis and Reporting |
|---------------------|------------------------|--------------------|----------------------------------|------------------------|----------------------|---------------------------------------|
| Atkin 2017          | Yellow                 | Green              | Green                            | Green                  | Green                | Green                                 |
| Park 2016           | Yellow                 | Yellow             | Green                            | Green                  | Red                  | Green                                 |
| Chung 2011          | Green                  | Green              | Green                            | Green                  | Green                | Green                                 |
| Chung 2013          | Green                  | Green              | Green                            | Green                  | Green                | Green                                 |
| Lee 2013            | Yellow                 | Yellow             | Green                            | Green                  | Green                | Red                                   |
| Cubiella 2016       | Yellow                 | Yellow             | Green                            | Green                  | Red                  | Yellow                                |
| Jung 2016           | Yellow                 | Green              | Green                            | Green                  | Green                | Green                                 |
| Vemulapalli 2014    | Green                  | Green              | Green                            | Green                  | Red                  | Green                                 |
| Van Heijningen 2013 | Green                  | Green              | Green                            | Green                  | Green                | Green                                 |
| Miller 2008         | Green                  | Green              | Green                            | Green                  | Green                | Green                                 |
| Martinez 2009       | Green                  | Green              | Green                            | Green                  | Green                | Green                                 |
| Laiyamo 2008        | Green                  | Green              | Green                            | Green                  | Green                | Green                                 |
| Huang 2012          | Green                  | Green              | Green                            | Green                  | Yellow               | Green                                 |
| Huang 2012a         | Green                  | Green              | Green                            | Green                  | Yellow               | Green                                 |
| Kim 2012            | Green                  | Green              | Green                            | Green                  | Green                | Green                                 |
| Facciorusso 2016    | Yellow                 | Green              | Green                            | Green                  | Green                | Green                                 |
| Pinsky 2009         | Green                  | Green              | Green                            | Green                  | Green                | Green                                 |
| Van Enckevort 2014  | Green                  | Green              | Green                            | Green                  | Green                | Green                                 |
| Fairley 2014        | Yellow                 | Yellow             | Green                            | Green                  | Green                | Green                                 |
| Huang 2010          | Green                  | Green              | Green                            | Green                  | Green                | Green                                 |
| Nusko 2008          | Red                    | Green              | Green                            | Green                  | Yellow               | Yellow                                |
| Lee 2017            | Green                  | Green              | Green                            | Green                  | Green                | Green                                 |
| Emilsson 2017       | Green                  | Green              | Green                            | Green                  | Green                | Green                                 |
| Coleman 2015        | Green                  | Green              | Green                            | Green                  | Green                | Green                                 |
| Solakoglu 2017      | Green                  | Red                | Green                            | Green                  | Red                  | Green                                 |
| Laish 2017          | Green                  | Green              | Green                            | Green                  | Green                | Green                                 |



| Study and date  | 1. Study Participation | 2. Study Attrition                  | 3. Prognostic Factor Measurement          | 4. Outcome Measurement                           | 5. Study Confounding   | 6. Statistical Analysis and Reporting |                                            |
|-----------------|------------------------|-------------------------------------|-------------------------------------------|--------------------------------------------------|------------------------|---------------------------------------|--------------------------------------------|
| Jang 2015       |                        |                                     |                                           |                                                  |                        |                                       |                                            |
| Tae 2017        |                        |                                     |                                           |                                                  |                        |                                       |                                            |
| Imperial 2014   |                        |                                     |                                           |                                                  |                        |                                       |                                            |
| Cottet 2012     |                        |                                     |                                           |                                                  |                        |                                       |                                            |
| <b>ROBINS-I</b> | <b>1. Confounding</b>  | <b>2. Selection of participants</b> | <b>3. Classification of interventions</b> | <b>4. Deviations from intended interventions</b> | <b>5. Missing data</b> | <b>6. Measurement of outcomes</b>     | <b>7. Selection of the reported result</b> |
| Winawer 1993    |                        |                                     |                                           |                                                  |                        |                                       |                                            |

### Synthesis of findings

Due to the design of the studies included in the review the synthesis of findings was limited to a narrative synthesis. As part of the narrative synthesis an assessment of risk of bias was undertaken using the modified Grading of Recommendations Assessment, Development and Evaluation (GRADE) approach which incorporates the findings of the quality assessment with other factors study factors to make an assessment of the strength of the evidence per synthesised finding. Table 5. summarises the factors contributing to the overall grade assessment.

**Table 5. GRADE assessment of risk of bias for the included studies**

| Reference        | Design        | N patients | Quality of evidence contributing to overall GRADE assessment         |                                                                                                                       |                                                    |
|------------------|---------------|------------|----------------------------------------------------------------------|-----------------------------------------------------------------------------------------------------------------------|----------------------------------------------------|
|                  |               |            | Study limitations (QUIPS)                                            | Imprecision:                                                                                                          | Publication bias:                                  |
| Atkin 2017       | Observational | N = 11 944 | Low risk of bias – Although only Intermediate risk patients included | For some prognostic factors the number of events at index were very small despite a large sample.                     | NA                                                 |
| Chung 2011       | Observational | N = 1210   | Low risk of bias                                                     | NA                                                                                                                    | NA                                                 |
| Chung 2013       | Observational | N = 131    | Low risk of bias                                                     | NA                                                                                                                    | NA                                                 |
| Miller 2011      | Observational | N = 88     | Low risk of bias                                                     | Due to the very small sample size the number of events was very small.                                                | NA                                                 |
| Facciorusso 2016 | Observational | N = 843    | Low risk of bias – although only high risk patients at baseline.     | Number of events unclear due to incomplete reporting                                                                  | NA                                                 |
| Enckevort 2014   | Observational | N= 433     | Low risk of bias.                                                    | Number of events unclear due to incomplete reporting                                                                  | Not all relevant prognostic factors were reported. |
| Fairley 2014     | Observational | N= 3300    | Low risk of bias                                                     | Number of events unclear due to incomplete reporting                                                                  | Not all relevant prognostic factors were reported. |
| Huang 2012       | Observational | N = 197    | Low to moderate risk of bias                                         | For some prognostic factors the number of events at index and follow up were very small due to the small sample size. | NA                                                 |
| Huang 2012a      | Observational | N= 1794    | Low to moderate risk of bias                                         | For some prognostic factors the number of events at index and follow up were very small due to the small sample size. | NA                                                 |

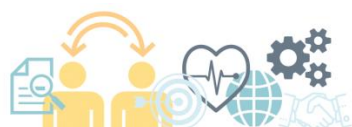

| Reference           | Design        | N patients | Quality of evidence contributing to overall GRADE assessment                                                        |                                                                                                                       |                                                                               |
|---------------------|---------------|------------|---------------------------------------------------------------------------------------------------------------------|-----------------------------------------------------------------------------------------------------------------------|-------------------------------------------------------------------------------|
|                     |               |            | Study limitations (QUIPS)                                                                                           | Imprecision:                                                                                                          | Publication bias:                                                             |
| Huang 2010          | Observational | N = 1356   | Low risk of bias                                                                                                    | NA                                                                                                                    | NA                                                                            |
| Laiyamo 2008        | Observational | N = 1905   | Low to moderate risk of bias                                                                                        | NA                                                                                                                    | NA                                                                            |
| Nusko 2008          | Observational | N = 1091   | High risk of bias – only patients with adenoma at surveillance included in analyses. No regression model presented. | NA                                                                                                                    | NA                                                                            |
| Park 2016           | Observational | N = 1479   | Moderate risk of bias - High risk patients only                                                                     | Number of events unclear due to incomplete reporting                                                                  | Not all relevant prognostic factors were reported.                            |
| Lee 2013            | Observational | N = 1760   | Moderate risk of bias - High risk patients only                                                                     | Number of events unclear due to incomplete reporting                                                                  | Only significant factors are reported                                         |
| Martinez 2009       | Observational | N = 9167   | Low risk of bias                                                                                                    | NA                                                                                                                    | NA                                                                            |
| Cubiella 2016       | Observational | N = 5401   | High risk of bias - Intermediate risk and high risk patients only                                                   | NA                                                                                                                    | NA                                                                            |
| Van Heijningen 2013 | Observational | N=2990     | Moderate risk of bias                                                                                               | For a small number of prognostic factors the number of events are small.                                              | NA                                                                            |
| Lee 2017            | Observational | N= 399     | Low risk of bias                                                                                                    | For some prognostic factors the number of events at index and follow up were very small due to the small sample size. | NA                                                                            |
| Emilsson 2017       | Observational | N= 90,864  | Low risk of bias                                                                                                    | NA                                                                                                                    | NA                                                                            |
| Coleman 2015        | Observational | N= 6972    | Low risk of bias                                                                                                    | NA                                                                                                                    | Not all relevant prognostic factors were reported.                            |
| Jung 2016           | Observational | N = 1646   | Moderate risk of bias - High risk patients only                                                                     | Number of events unclear due to incomplete reporting                                                                  | Not all relevant prognostic factors were reported.                            |
| Solakoglu 2017      | Observational | N = 47     | High risk of bias                                                                                                   | For some prognostic factors the number of events at index and follow up were very small due to the small sample size. | NA                                                                            |
| Cottet 2012         | Observational | N= 5779    | Low risk of bias                                                                                                    | Number of events unclear due to incomplete reporting                                                                  | NA                                                                            |
| Laish 2017          | Observational | N=1165     | Low risk of bias                                                                                                    | NA                                                                                                                    | Not all relevant prognostic factors were reported.                            |
| Jang 2015           | Observational | N = 434    | Low risk of bias – Although high risk patients only                                                                 | Number of events unclear due to incomplete reporting.                                                                 | NA                                                                            |
| Tae 2017            | Observational | N = 2904   | Low risk of bias                                                                                                    | NA                                                                                                                    | Not all relevant prognostic factors were reported. Age, sex and BMI only.     |
| Pinsky 2009         | Observational | N = 2607   | Low risk of bias.                                                                                                   | Number of events unclear due to incomplete reporting.                                                                 | Not all relevant prognostic factors were reported. Sex only.                  |
| Imperiale, 2014     | Observational | N = 965    | Low risk of bias                                                                                                    | NA                                                                                                                    | Not all relevant prognostic factors were reported. Only age and sex reported. |



| Reference        | Design        | N patients | Quality of evidence contributing to overall GRADE assessment |                                                       |                                               |
|------------------|---------------|------------|--------------------------------------------------------------|-------------------------------------------------------|-----------------------------------------------|
|                  |               |            | Study limitations (QUIPS)                                    | Imprecision:                                          | Publication bias:                             |
| Vemulapalli 2014 | Observational | N=1414     | Moderate risk of bias.                                       | Number of events unclear due to incomplete reporting. | Not all relevant prognostic factors reported. |
| Winawer 1993     | RCT           | N= 1418    | High risk of bias – high attrition rate.                     | NA                                                    | NA                                            |

In the following sections evidence relating to each of the CQs will be presented separately. The number of studies relating to each CQ will be stated together with a table of findings for each sub CQ and the table will be followed by a narrative synthesis of those findings for each sub CQ. It should be noted that not all studies presented multivariate analyses (adjusted for covariates) in addition to univariate analyses, therefore where non significant multivariate analyses follow significant univariate analyses, this should be considered.

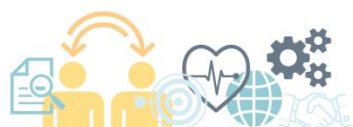

### Results relating to CQ1

Evidence was reported in twenty six observational studies for CQ1. The studies examined, patient, polyp and colonoscopy related predictors for advanced colorectal adenomas (AA) incidence at first surveillance after polypectomy at index colonoscopy, colorectal cancer (CRC) incidence at first surveillance after polypectomy at index colonoscopy, long term CRC incidence, and long term CRC mortality. Most of the included studies were rated as either low or moderate risk of bias with four studies rated as having a high risk of bias. The evidence relating to each of the prognostic factors is presented in Table 6.

**Table 6. Findings from studies included for CQ1 for each of the prognostic factors.**

| First author, year                                    | Study design                             | Participants Age (M, SD unless otherwise specified) and Sex                                                                                                                                                                                                                                                                 | Follow up times                                                                                                                                          | Incidence of AA at next surv (*indicates AN)                                                                                                                    | Incidence CRC at next surv                                                                                                                                                                                                                                                                                                                                            | Long term CRC incidence                                                                                                                                                                                                                                                 | Long term CRC mortality | Level of evidence (QUIPS) |
|-------------------------------------------------------|------------------------------------------|-----------------------------------------------------------------------------------------------------------------------------------------------------------------------------------------------------------------------------------------------------------------------------------------------------------------------------|----------------------------------------------------------------------------------------------------------------------------------------------------------|-----------------------------------------------------------------------------------------------------------------------------------------------------------------|-----------------------------------------------------------------------------------------------------------------------------------------------------------------------------------------------------------------------------------------------------------------------------------------------------------------------------------------------------------------------|-------------------------------------------------------------------------------------------------------------------------------------------------------------------------------------------------------------------------------------------------------------------------|-------------------------|---------------------------|
| <b>Absolute values (where available) and OR/HR/RR</b> |                                          |                                                                                                                                                                                                                                                                                                                             |                                                                                                                                                          |                                                                                                                                                                 |                                                                                                                                                                                                                                                                                                                                                                       |                                                                                                                                                                                                                                                                         |                         |                           |
| <b>CQ1.1 High grade dysplasia v low grade</b>         |                                          |                                                                                                                                                                                                                                                                                                                             |                                                                                                                                                          |                                                                                                                                                                 |                                                                                                                                                                                                                                                                                                                                                                       |                                                                                                                                                                                                                                                                         |                         |                           |
| Atkin 2017                                            | Retrospective, multicentre, cohort study | N = <b>11 944</b> patients with data available for analysis; <b>4608</b> attended one or more surveillance visits and <b>7336</b> patients did not attend surveillance.<br>Age = Median age 66-7 years (IQR 58-4-74-0)<br><55yrs 2122 (18%); 55-64yrs 3179 (27%); 65-74yrs 3957 (33%); 75+ys 2686 (22%)<br>Sex = 55.47 Male | FS or more (All surveillance intervals, 0, 1, 2 3+, plus comparisons of no surveillance v surveillance) Median follow up time 7-9 years, (IQR 5-6-11-1). | UV Ref low grade (n=483/14.09%) OR (95%) (n=4608)<br><br>High grade (n=162/19.06%) <b>1.44 (1.18 - 1.75)</b><br>Unknown (n=78/23.56%) <b>1.88 (1.43 - 2.47)</b> | UV Ref low grade (n51/1.49%) OR (95%) (n=4608)<br>High grade (n26/3.06%) <b>2.09 (1.29 - 3.37)</b><br>Unknown (n7/2.11%) <b>1.43 (0.64 - 3.18)</b><br><br>MV FS: Model 1 interval as categorical<br>Low grade (ref)<br>High grade <b>1.81 (1.09 to 3.02)</b><br><br>MV FS: Model 2 interval as continuous<br>Low grade (ref)<br>High grade <b>1.74 (1.04 to 2.90)</b> | UV HR (95% CI): (n=11944) (vs low grade n139/94) High grade (n51/1994) <b>1.85 (1.34-2.55)</b> ; Unknown (20/474) <b>1.71 (1.06-2.77)</b> p= 0.0005<br><br>MV HR (95% CI):(vs low grade) High grade <b>1.69 (1.21-2.36)</b><br>Unknown <b>1.69 (1.04-2.76)</b> p=0.0033 |                         | Low risk of bias          |
| *Cubiella 2016                                        | Retrospective cohort study               | N = 5401 (2022 HR group; 3379 IR group)<br>Age = 60-69yr; HR 842 (60%); IR 1241 (58.2%); 50-59yrs; HR 562 (40%) IR 891 (41.8%).                                                                                                                                                                                             | Mean follow up 2.8 years (SD 1 yr) for 65% of study population                                                                                           | *High grade dysplasia: Ref none: : None 14.2% (12-.9-15.5) (at least one 12.1 (9.7-14.4)<br>OR (95%CI) <b>0.7 (0.5-0.98)</b>                                    |                                                                                                                                                                                                                                                                                                                                                                       |                                                                                                                                                                                                                                                                         |                         | High risk of bias         |





| First author, year                                                   | Study design                     | Participants Age (M, SD unless otherwise specified) and Sex                            | Follow up times                                                                    | Incidence of AA at next surv (*indicates AN)                                                                                                                 | Incidence CRC at next surv                                                                                         | Long term CRC incidence | Long term CRC mortality | Level of evidence (QUIPS)    |
|----------------------------------------------------------------------|----------------------------------|----------------------------------------------------------------------------------------|------------------------------------------------------------------------------------|--------------------------------------------------------------------------------------------------------------------------------------------------------------|--------------------------------------------------------------------------------------------------------------------|-------------------------|-------------------------|------------------------------|
|                                                                      |                                  |                                                                                        |                                                                                    | <b>Absolute values (where available) and OR/HR/RR</b>                                                                                                        |                                                                                                                    |                         |                         |                              |
|                                                                      |                                  | Sex = Male HR 74.9%; IR 67.4%.                                                         |                                                                                    |                                                                                                                                                              |                                                                                                                    |                         |                         |                              |
| Facciorusso 2016a b                                                  | Retrospective cohort             | n = 843<br>Age: Median 58 (IQR 52-67)<br>Sex: 61.9% Male                               | FS at 3 years.                                                                     | <b>UV OR (95% CI)</b><br>3.25 (1.23 - 5.60), p<0.001<br><b>MV</b><br>OR 4.25 (2.11-7.5), p<0.001                                                             |                                                                                                                    |                         |                         | Low risk of bias             |
| Fairley 2014                                                         | Retrospective cohort             | N= 3300<br>Age = NR for sub cohort<br>Sex = NR for sub cohort                          | FS+ (all patients had one or more screening / surveillance colonoscopies (Time NR) | <b>OR (95%CI)</b><br>4.3 (2.2, 8.4; p0.0001)                                                                                                                 | <b>OR (95%CI)</b><br>13.2 (2.8, 62.1, 0.001)                                                                       |                         |                         | Low risk of bias             |
| Huang 2012a                                                          | Retrospective cohort             | N= 1794<br>Age = Mean NR<br><50: 40%<br>50-60: 29%<br>>60 years: 30%<br>Sex = 64% Male | FS combined (had "at least one surveillance"), 2.67 years                          |                                                                                                                                                              | <b>Interval CRC, OR (95% CI)</b><br>Low grade: 1 (n7/50%)<br>High grade: (n7/50%)<br>1.61 (1.07 - 2.42)<br>p=0.023 |                         |                         | Low risk of bias             |
| Huang 2010                                                           | Retrospective cohort             | N= 1356<br>Age = 52.4 (±12.5) (range 20– 84 years)<br>Sex = 63.6% male                 | FS SS subsequent - data on cumulative recurrence 1 – 20 years                      | <b>high-grade dysplasia:</b><br>{LG n66/5.7%; HG n 57/27.7%}<br>(HR 1.61; 95% CI 1.07–2.42)<br>P=0.023                                                       |                                                                                                                    |                         |                         | Low risk of bias             |
| Laiyamo 2008; (Laiyamo 2011; Laiyamo 2012; Laiyamo 2013; Leung 2010) | Prospective cohort (from thePPT) | N = 1905<br>Age = 61.1 (9.9)<br>Sex = 64.5% Male                                       | 4 years (end of trial). (follow up data at 6.2 years after the end of the trial)   | Presence of high grade dysplasia (ref no HDG 109/1752) RR AA (15/145) v NAA (47/145) <b>1.11 (0.62-1.97)</b> ; RR AA v no A (83/145) <b>1.11 (0.64-1.90)</b> | (follow up data at 6.2 years)                                                                                      |                         |                         | Low to moderate risk of bias |
| *Lee 2013                                                            | Retrospective cohort study       | N = 1760 (high-risk adenoma at index)<br>Age = 65.8±3.5<br>Sex = 76% Male              | 1 year – mean interval between index and surveillance 387 (SD = 89) days           | <b>*MV OR (95% CI)</b><br><b>HGD NS- high-grade dysplasia</b><br><b>(P = 0.280)</b>                                                                          |                                                                                                                    |                         |                         | Moderate risk of bias        |
| *Martinez 2009                                                       | Pooled analysis of 8             | N = 9167<br>Age = Mean 62.0<br>Sex = 71.2% male                                        | Median follow-up was 47.2 months, range 36.9 to 59.0                               | <b>*HDG No is reference [AA 10.6% (95% CI 9.8–11.3) CRC 0.5% (0.4–0.7)</b>                                                                                   |                                                                                                                    |                         |                         | Low risk of bias             |



| First author, year                                                                                                                  | Study design                             | Participants Age (M, SD unless otherwise specified) and Sex                                                                                                                                                                                                         | Follow up times                                                                                                                            | Incidence of AA at next surv (*indicates AN)                                                                                                                                             | Incidence CRC at next surv                                                                   | Long term CRC incidence                                                                                                                    | Long term CRC mortality | Level of evidence (QUIPS) |
|-------------------------------------------------------------------------------------------------------------------------------------|------------------------------------------|---------------------------------------------------------------------------------------------------------------------------------------------------------------------------------------------------------------------------------------------------------------------|--------------------------------------------------------------------------------------------------------------------------------------------|------------------------------------------------------------------------------------------------------------------------------------------------------------------------------------------|----------------------------------------------------------------------------------------------|--------------------------------------------------------------------------------------------------------------------------------------------|-------------------------|---------------------------|
|                                                                                                                                     | retrospective studies                    |                                                                                                                                                                                                                                                                     |                                                                                                                                            | <b>Absolute values (where available) and OR/HR/RR</b>                                                                                                                                    |                                                                                              |                                                                                                                                            |                         |                           |
|                                                                                                                                     |                                          |                                                                                                                                                                                                                                                                     |                                                                                                                                            | Yes AA 16.0% (13.2–18.7) CRC 1.3% (0.5–2.2)<br>Yes adjusted OR 1.05 (0.81–1.35)                                                                                                          |                                                                                              |                                                                                                                                            |                         |                           |
| Nusko 2008                                                                                                                          | Prospective cohort                       | N = 1091<br>Age = 57.06<br>Sex = 64.16%                                                                                                                                                                                                                             | Up to 4 surveillance intervals.(at 2 or 4 yr intervals)                                                                                    | At index: High grade dysplasia n=51, 8.9%)<br>1st recurrence (FS) n=15, 2.6)<br>p<0.00001                                                                                                |                                                                                              |                                                                                                                                            |                         | High risk of bias         |
| *Park 2016                                                                                                                          | Retrospective cohort study               | N = 1479 (high-risk adenoma at index, and last surveillance ≥ 2.5 years after index)<br>Age = Group 1, < 50 years (n = 233)<br>Group 2, 50–69 years (n = 1000)<br>Group 3, ≥70 years (n = 246)<br>Sex = Group 1 75.1% Male, Group 2 74.6% Male, Group 3 69.5% Male. | Mean time to the last colonoscopic surveillance was about 4 years. Groups 1, 2, and 3 (4.1 ± 1.4, 4.0 ± 1.4, and 4.0 ± 1.5, respectively). | *HR (95% CI):<br>HDG 0.94 (0.66–1.34)                                                                                                                                                    |                                                                                              |                                                                                                                                            |                         | Moderate risk of bias     |
| Van Enckevort 2014                                                                                                                  | Retrospective cohort                     | N= 433<br>Age = 55 (range 24-82)<br>Sex = 41% Male                                                                                                                                                                                                                  | Median follow-up period was 85 months (range 9-260).                                                                                       | HR=1.73; 95% CI 1.13-2.64; p=0.012                                                                                                                                                       |                                                                                              |                                                                                                                                            |                         | Moderate risk of bias     |
| *Van Heijninge n 2013                                                                                                               | Retrospective cohort study               | N=2990<br>Age = 61.3<br>Sex = 1647 (55%) Male.                                                                                                                                                                                                                      | FS Median 24 months (IQR 12-40m)<br>Mean number of surveillances 1.7 (range 1-5)                                                           | *MV OR (95%CI)<br>HDG (AA 34 (8.1%); CRC 13 (3.1%) OR 1.2 (0.8-1.8)                                                                                                                      |                                                                                              |                                                                                                                                            |                         | Moderate risk of bias     |
| <b>CQ 1.2 Polyp: Villous component ≥25% (tubulovillous or villous histology) Polyp: NO Villous component ≥25% (tubulovillous or</b> |                                          |                                                                                                                                                                                                                                                                     |                                                                                                                                            |                                                                                                                                                                                          |                                                                                              |                                                                                                                                            |                         |                           |
| Atkin 2017                                                                                                                          | Retrospective, multicentre, cohort study | N = 11 944 patients with data available for analysis; 4608 attended one or more surveillance visits and 7336 patients did not attend surveillance.Age = Median age 66.7 years (IQR 58.4–74.0)                                                                       | FS or more (All surveillance intervals, 0, 1, 2 3+, plus comparisons of no surveillance v surveillance)Median follow up time 7.9           | UV Ref Tubular (n171/9.92%) OR (95%)(n=4608)<br>Tubulovillous (n374/17.51%) 1.93 (1.59 to 2.34)<br>Villous (n115/25.05%) 3.03 (2.33 to 3.95)<br>Unknown (n63/21.72%) 2.52 (1.83 to 3.47) | UV Ref Tubular (n18/1.04%) OR (95%)(n=4608)<br>Tubulovillous (n39/1.83%) 1.76 (1.00 to 3.09) | UV HR (95% CI): (vs tubular n64/4742) (n=11944)<br>Tubulovillous (n99/5576) 1.36 (1.00–1.87) ; Villous (24/1142) 1.65 (1.03–2.64); Unknown |                         | Low risk of bias          |



| First author, year              | Study design                                  | Participants Age (M, SD unless otherwise specified) and Sex                                                                                                       | Follow up times                                                                             | Incidence of AA at next surv (*indicates AN)                                                                                                                                                                                                                                                                                                | Incidence CRC at next surv                                                                                                                                                                                                                                                                                                                                                                                                                         | Long term CRC incidence                                                                                                                                                                                   | Long term CRC mortality                                                           | Level of evidence (QUIPS) |  |
|---------------------------------|-----------------------------------------------|-------------------------------------------------------------------------------------------------------------------------------------------------------------------|---------------------------------------------------------------------------------------------|---------------------------------------------------------------------------------------------------------------------------------------------------------------------------------------------------------------------------------------------------------------------------------------------------------------------------------------------|----------------------------------------------------------------------------------------------------------------------------------------------------------------------------------------------------------------------------------------------------------------------------------------------------------------------------------------------------------------------------------------------------------------------------------------------------|-----------------------------------------------------------------------------------------------------------------------------------------------------------------------------------------------------------|-----------------------------------------------------------------------------------|---------------------------|--|
|                                 |                                               |                                                                                                                                                                   |                                                                                             | <b>Absolute values (where available) and OR/HR/RR</b>                                                                                                                                                                                                                                                                                       |                                                                                                                                                                                                                                                                                                                                                                                                                                                    |                                                                                                                                                                                                           |                                                                                   |                           |  |
|                                 |                                               | <55yrs 2122 (18%); 55-64yrs 3179 (27%); 65-74yrs 3957 (33%); 75+yrs 2686 (22%)<br>Sex = 55.47 Male                                                                | years, (IQR 5-6-11.1),                                                                      | MV FS: Model 1 interval as categorical<br>Worst adenoma histology, Tubular (ref)<br>Tubulovillous <b>1.42 (1.15 to 1.76)</b><br>Villous <b>1.59 (1.17 to 2.18)</b><br><br>MV FS: Model 2 interval as continuous<br>Worst adenoma histology, Tubular (ref)<br>Tubulovillous <b>1.42 (1.15 to 1.75)</b><br>Villous <b>1.59 (1.17 to 2.17)</b> | Villous (n19/4.14%) <b>4.09 (2.13 to 7.86)</b><br>Unknown (n8/2.76%) <b>2.69 (1.16 to 6.24)</b><br><br>MV FS: Model 1 interval as categorical<br>Worst adenoma histology, Tubular (ref)<br>Tubulovillous <b>1.46 (0.82 to 2.60)</b><br>Villous <b>2.55 (1.28 to 5.08)</b><br><br>MV FS: Model 2 interval as continuous<br>Worst adenoma histology, Tubular (ref)<br>Tubulovillous <b>1.52 (0.85 to 2.71)</b><br>Villous <b>2.94 (1.48 to 5.82)</b> | (n23/484) <b>2.61 (1.61-4.23)</b> p=0.0018<br>Multivariate HR (95% CI):(vs tubular)<br>Tubulovillous <b>1.16 (0.84-1.61)</b> ; Villous <b>1.16 (0.71-1.91)</b> ; Unknown <b>2.50 (1.40-4.47)</b> p=0.0348 |                                                                                   |                           |  |
| Coleman 2015                    | Retrospective cohort with nested case control | N= 6972<br>Age = 62.3 (13.1)<br>Sex =54.7 Male                                                                                                                    | Study conducted over a 6 year time period                                                   |                                                                                                                                                                                                                                                                                                                                             | MV HR ref tubular (1771/36); villous/tubulovillous (3368/97) <b>1.51 (1.02-2.23)</b>                                                                                                                                                                                                                                                                                                                                                               |                                                                                                                                                                                                           |                                                                                   | Low risk of bias          |  |
| *Cubiella 2016                  | Retrospective cohort study                    | N = 5401 (2022 HR group; 3379 IR group)<br>Age = 60-69yr; HR 842 (60%); IR 1241 (58.2%); 50-59yrs; HR 562 (40%) IR 891 (41.8%).<br>Sex = Male HR 74.9%; IR 67.4%. | Mean follow up 2.8 years (SD 1 yr) for 65% of study population                              | *Villous%: None 11.7 (10.2-13.3); at least one 15.5% (13.9-17.7)<br><b>OR 1.4 (1.1-1.7)</b>                                                                                                                                                                                                                                                 |                                                                                                                                                                                                                                                                                                                                                                                                                                                    |                                                                                                                                                                                                           |                                                                                   | High risk of bias         |  |
| Emilsson 2017 (and Loberg 2014) | Retrospective cohort                          | N= 90,864<br>Age = median 67.7yr)<br>40-49 (7.9%)<br>50-59 (19.7%)<br>60-69 (29.4%)<br>70-79 (29.3%)<br>=/+ 80 (13.7%)                                            | Long term follow up - Median follow-up was 7.2 years [Does not report number of follow ups] |                                                                                                                                                                                                                                                                                                                                             |                                                                                                                                                                                                                                                                                                                                                                                                                                                    |                                                                                                                                                                                                           | UV HR(95%CI): Villous or tubulovillous (v tubulous) <b>1.56 (1.36-1.79)</b> P<.01 | Low risk of bias          |  |



| First author, year                                      | Study design                     | Participants Age (M, SD unless otherwise specified) and Sex                            | Follow up times                                                                    | Incidence of AA at next surv (*indicates AN)                                                                                                             | Incidence CRC at next surv                                                                                          | Long term CRC incidence | Long term CRC mortality             | Level of evidence (QUIPS)    |
|---------------------------------------------------------|----------------------------------|----------------------------------------------------------------------------------------|------------------------------------------------------------------------------------|----------------------------------------------------------------------------------------------------------------------------------------------------------|---------------------------------------------------------------------------------------------------------------------|-------------------------|-------------------------------------|------------------------------|
|                                                         |                                  |                                                                                        |                                                                                    | Absolute values (where available) and OR/HR/RR                                                                                                           |                                                                                                                     |                         |                                     |                              |
|                                                         |                                  | Sex = 51.5 Male                                                                        |                                                                                    |                                                                                                                                                          |                                                                                                                     |                         | MV analysis: 1.30 (1.13-1.50) P<.01 |                              |
| Facciorusso 2016a b                                     | Retrospective cohort             | n = 843<br>Age: Median 58 (IQR 52-67)<br>Sex: 61.9% Male)                              | FS at 3 years.                                                                     | VV OR (95% CI)<br>Ref: Tubular<br>Tubulo-Villous 1.49 (0.47-5.18)<br>Villous 1.73 (0.68 - 4.45)                                                          |                                                                                                                     |                         |                                     | Low risk of bias             |
| Fairley 2014                                            | Retrospective cohort             | N= 3300<br>Age = NR for sub cohort<br>Sex = NR for sub cohort                          | FS+ (all patients had one or more screening / surveillance colonoscopies (Time NR) | Villous - present or absent: OR (95%CI)<br>3.7 (2.9, 4.7; p0.0001)                                                                                       | Villous - present or absent OR (95%CI)<br>7.4 (2.5, 21.5; 0.01)                                                     |                         |                                     | Low risk of bias             |
| Huang 2012a                                             | Retrospective cohort             | N= 1794<br>Age = Mean NR<br><50: 40%<br>50-60: 29%<br>>60 years: 30%<br>Sex = 64% Male | FS combined (had "at least one surveillance"), 2.67 years                          |                                                                                                                                                          | Interval CRC<br>Tubular: 1<br>Tubulovillous and villous adenoma: 1.38 (1.03 - 1.85), p=0.030                        |                         |                                     | Low risk of bias             |
| Huang 2010                                              | Retrospective cohort             | N= 1356<br>Age = 52.4 (±12.5) (range 20- 84 years)<br>Sex = 63.6% male                 | FS SS subsequent - data on cumulative recurrence 1 - 20 years.                     | Tubular ref (n20/2.1%)<br>tubulovillous and villous histology(n103/26.1%) (HR 2.57; 95% CI 1.24-5.32) p=0.011                                            |                                                                                                                     |                         |                                     | Low risk of bias             |
| Laish 2017                                              | Retrospective cohort             | N=1165<br>Age = 62.4±9.6<br>Sex = 54.2% male                                           | Interval between procedures was at least 1 year and less than 5 years              | Small TVA odds ratio 0.63 (0.36-1.12); Large TVA OR 2.11 (1.40-3.19)                                                                                     | Small TVA 3/199 (1.5%), of which 2 were IMC and 1 was invasive; Large TVA 3/233 (1.3%), of which all were invasive. |                         |                                     | Low risk of bias             |
| Laiyamo 2008 (Laiyamo 2011; Laiyamo 2012; Laiyamo 2013; | Prospective cohort (from thePPT) | N = 1905<br>Age = 61.1 (9.9)<br>Sex = 64.5% Male                                       | 4 years (end of trial). (follow up data at 6.2 years after the end of the trial)   | Villous /tubulovillous component (ref no villous component 78/1521) RR AA (47/347) v NAA (111/384) 2.38 (1.56-3.64) AA v No A (226/384) 2.25 (1.49-3.39) |                                                                                                                     |                         |                                     | Low to moderate risk of bias |



| First author, year    | Study design                               | Participants Age (M, SD unless otherwise specified) and Sex                                                                                                                                                                                                                                                                                                   | Follow up times                                                                                                                            | Incidence of AA at next surv (*indicates AN)                                                                                                                                     | Incidence CRC at next surv | Long term CRC incidence | Long term CRC mortality | Level of evidence (QUIPS) |
|-----------------------|--------------------------------------------|---------------------------------------------------------------------------------------------------------------------------------------------------------------------------------------------------------------------------------------------------------------------------------------------------------------------------------------------------------------|--------------------------------------------------------------------------------------------------------------------------------------------|----------------------------------------------------------------------------------------------------------------------------------------------------------------------------------|----------------------------|-------------------------|-------------------------|---------------------------|
|                       |                                            |                                                                                                                                                                                                                                                                                                                                                               |                                                                                                                                            | <b>Absolute values (where available) and OR/HR/RR</b>                                                                                                                            |                            |                         |                         |                           |
| Leung 2010)           |                                            |                                                                                                                                                                                                                                                                                                                                                               |                                                                                                                                            |                                                                                                                                                                                  |                            |                         |                         |                           |
| *Lee 2013             | Retrospective cohort study                 | N = 1760 patients with high-risk adenoma detected at index colonoscopy<br>Age = 65.8±3.5<br>Sex = 76% Male                                                                                                                                                                                                                                                    | 1 year – mean interval between index and surveillance 387 (SD = 89) days                                                                   | *MV OR (95% CI)<br>*Villous = <b>1.98 (1.11 - 3.53)</b><br>p=0.020 (absolute rates = 101 (6.2%) of 1634 vs 15 (11.9%) of 126).                                                   |                            |                         |                         | Moderate risk of bias     |
| *Martinez 2009        | Pooled analysis of 8 retrospective studies | N = 9167<br>Age = Mean 62.0<br>Sex = 71.2% male                                                                                                                                                                                                                                                                                                               | Median follow-up was 47.2 months, range 36.9 to 59.0                                                                                       | *Tubular is reference (AA 9.7% (95%CI 9.0–10.4) CRC 0.6% (95%CI 0.4–0.7).<br>Tubulovillous/villous (AA 16.8% (15.1–18.5); CRC 0.9% (0.5–1.4) adjusted <b>OR 1.28 (1.07-1.52)</b> |                            |                         |                         | Low risk of bias          |
| Nusko 2008            | Prospective cohort                         | N = 1091<br>Age = 57.06<br>Sex = 64.16%                                                                                                                                                                                                                                                                                                                       | Up to 4 surveillance intervals.(at 2 or 4 yr intervals)                                                                                    | At index: villous n=201, 35.1%) at 1st recurrence (FS) n = 121 (21.2%) p<0.0001                                                                                                  |                            |                         |                         | High risk of bias         |
| *Park 2016            | Retrospective cohort study                 | N = 1479 patients with high-risk adenoma detected at index colonoscopy who underwent their last colonoscopic surveillance ≥ 2.5 years after index colonoscopy were identified.<br>Age = Group 1, < 50 years (n = 233)<br>Group 2, 50–69 years (n = 1000)<br>Group 3, ≥70 years (n = 246)<br>Sex = Group 1 75.1% Male, Group 2 74.6% Male, Group 3 69.5% Male. | Mean time to the last colonoscopic surveillance was about 4 years. Groups 1, 2, and 3 (4.1 ± 1.4, 4.0 ± 1.4, and 4.0 ± 1.5, respectively). | *HR (95% CI):<br><b>TVA or VA 1.29 (0.92-1.81)</b>                                                                                                                               |                            |                         |                         | Moderate risk of bias     |
| Solakoglu 2017        | Prospective Cohort                         | N = 47<br>Age =55.81 ±10.84<br>Sex = 72.3%                                                                                                                                                                                                                                                                                                                    | 3 years                                                                                                                                    | <b>MV OR: 2.700, 95%CI: 0.405-18.002, p = 0.990</b>                                                                                                                              |                            |                         |                         | High risk of bias         |
| *Van Heijninge n 2013 | Retrospective cohort study                 | N=2990<br>Age = 61.3<br>Sex = 1647 (55%) Male.                                                                                                                                                                                                                                                                                                                | FS Median 24 months (IQR 12-40m)                                                                                                           | *MV OR (95%CI)<br>Villous (AA 20 (13%); CRC 6 (3.8%))<br><b>OR 2.0 (1.2-3.2)</b>                                                                                                 |                            |                         |                         | Moderate risk of bias     |



| First author, year                                                                                                                                  | Study design                             | Participants Age (M, SD unless otherwise specified) and Sex                                                                                                                                                                                                                                                           | Follow up times                                                                                                                                          | Incidence of AA at next surv (*indicates AN)                                                                                                                                                                                                                                                                                                                                                                                                                  | Incidence CRC at next surv                                                                                                                                                                                               | Long term CRC incidence                                                                                                                                                                                                                                                   | Long term CRC mortality | Level of evidence (QUIPS) |  |
|-----------------------------------------------------------------------------------------------------------------------------------------------------|------------------------------------------|-----------------------------------------------------------------------------------------------------------------------------------------------------------------------------------------------------------------------------------------------------------------------------------------------------------------------|----------------------------------------------------------------------------------------------------------------------------------------------------------|---------------------------------------------------------------------------------------------------------------------------------------------------------------------------------------------------------------------------------------------------------------------------------------------------------------------------------------------------------------------------------------------------------------------------------------------------------------|--------------------------------------------------------------------------------------------------------------------------------------------------------------------------------------------------------------------------|---------------------------------------------------------------------------------------------------------------------------------------------------------------------------------------------------------------------------------------------------------------------------|-------------------------|---------------------------|--|
|                                                                                                                                                     |                                          |                                                                                                                                                                                                                                                                                                                       |                                                                                                                                                          | <b>Absolute values (where available) and OR/HR/RR</b>                                                                                                                                                                                                                                                                                                                                                                                                         |                                                                                                                                                                                                                          |                                                                                                                                                                                                                                                                           |                         |                           |  |
|                                                                                                                                                     |                                          |                                                                                                                                                                                                                                                                                                                       | Mean number of surveillances 1.7 (range 1-5)                                                                                                             |                                                                                                                                                                                                                                                                                                                                                                                                                                                               |                                                                                                                                                                                                                          |                                                                                                                                                                                                                                                                           |                         |                           |  |
| <b>CQ1.3 Polyp: Size of largest adenoma (variants: ≥10mm, or ≥20mm) Polyp: Size of largest adenoma NOT greater than (variants: ≥10mm, or ≥20mm)</b> |                                          |                                                                                                                                                                                                                                                                                                                       |                                                                                                                                                          |                                                                                                                                                                                                                                                                                                                                                                                                                                                               |                                                                                                                                                                                                                          |                                                                                                                                                                                                                                                                           |                         |                           |  |
| Atkin 2017                                                                                                                                          | Retrospective, multicentre, cohort study | N = <b>11 944</b> patients with data available for analysis; <b>4608</b> attended one or more surveillance visits and <b>7336</b> patients did not attend surveillance. Age = Median age 66.7 years (IQR 58.4–74.0) <55yrs 2122 (18%); 55-64yrs 3179 (27%); 65-74yrs 3957 (33%); 75+ys 2686 (22%)<br>Sex = 55.47 Male | FS or more (All surveillance intervals, 0, 1, 2 3+, plus comparisons of no surveillance v surveillance) Median follow up time 7.9 years, (IQR 5.6–11.1), | UV Ref <10mm (n42/12.00%)<br>OR (95%) (n=4608)<br>10–14 (n190/12.05%) <b>1.00</b><br><b>(0.7 to 1.43)</b><br>15–19 (n122/12.80%) <b>1.08</b><br><b>(0.74 to 1.57)</b><br>≥ 20 (n369/21.35%) <b>1.99 (1.41 to 2.80)</b><br><br>MV FS: Model 1 interval as categorical<br>Largest adenoma (mm) < 20 (ref)<br>≥ 20 <b>1.69 (1.39 to 2.06)</b><br><br>MV FS: Model 2 interval as continuous<br>Largest adenoma (mm) < 20 (ref)<br>≥ 20 <b>1.69 (1.39 to 2.06)</b> | UV Ref <10mm (n1/0.29%) OR (95%)(n=4608)<br>10–14 (n29/1.84%) <b>6.54</b><br><b>(0.89 to 48.16)</b><br>15–19 (n16/1.68%) <b>5.96</b><br><b>(0.79 to 45.10)</b><br>≥ 20 <b>7.85 (n38/2.20%)</b><br><b>(1.07 to 57.34)</b> | UV HR (95% CI): (n=11944) (vs<10mm n10/1029) 10-19mm (n116/6857) <b>1.62</b><br><b>(0.85–3.09)</b> ;<br>=/+20mm (n84/4058) <b>2.02 (1.05–3.89)</b> p=0.0495<br>Multivariate HR (95% CI):(vs<10mm)10-19mm <b>1.97 (1.01–3.81)</b> =/+20mm <b>2.28 (1.16–4.50)</b> p=0.0335 |                         | Low risk of bias          |  |
| *Cubiella 2016                                                                                                                                      | Retrospective cohort study               | N = 5401 (2022 HR group; 3379 IR group)<br>Age = 60-69yr; HR 842 (60%); IR 1241 (58.2%); 50-59yrs; HR 562 (40%) IR 891 (41.8%).<br>Sex = Male HR 74.9%; IR 67.4%.                                                                                                                                                     | Mean follow up 2.8 years (SD 1 yr) for 65% of study population                                                                                           | *Size%: <10mm 12.8 (10.6-13.1); 10-19mm 14.0 (12.3-15.6); =>20mm 14.5 (12.2-16.7).<br>OR 10-19mm(ref<10mm) <b>1.2 (0.9-1.5)</b> ;<br>OR =>20mm (ref<10mm) <b>1.2 (0.9-1.6)</b>                                                                                                                                                                                                                                                                                |                                                                                                                                                                                                                          |                                                                                                                                                                                                                                                                           |                         | High risk of bias         |  |
| Facciorusso 2016a b                                                                                                                                 | Retrospective cohort                     | n = 843<br>Age: Median 58 (IQR 52-67)<br>Sex: 61.9% Male                                                                                                                                                                                                                                                              | FS at 3 years.                                                                                                                                           | UV OR (95%) (ref 15mm or more): <b>2.84 (1.75-4.19)</b> p<0.001<br>MV OR >15mm (ref 15mm or less): <b>3.96 (1.87-7.55)</b> <0.0001                                                                                                                                                                                                                                                                                                                            |                                                                                                                                                                                                                          |                                                                                                                                                                                                                                                                           |                         | Low risk of bias          |  |
| Fairley 2014                                                                                                                                        | Retrospective cohort                     | N= 3300<br>Age = NR for sub cohort                                                                                                                                                                                                                                                                                    | FS+ (all patients had one or more                                                                                                                        | size +/- 10mm versus 1-9: OR (95%CI) <b>1.9 (1.07 to 3.04)</b>                                                                                                                                                                                                                                                                                                                                                                                                | size +/- 10mm versus 1-9: OR (95%CI) <b>1.9 (1.07 to 3.04)</b>                                                                                                                                                           |                                                                                                                                                                                                                                                                           |                         | Low risk of bias          |  |



| First author, year                                                  | Study design                      | Participants Age (M, SD unless otherwise specified) and Sex                            | Follow up times                                                                  | Incidence of AA at next surv (*indicates AN)                                                                                                           | Incidence CRC at next surv                                                                   | Long term CRC incidence | Long term CRC mortality | Level of evidence (QUIPS)    |
|---------------------------------------------------------------------|-----------------------------------|----------------------------------------------------------------------------------------|----------------------------------------------------------------------------------|--------------------------------------------------------------------------------------------------------------------------------------------------------|----------------------------------------------------------------------------------------------|-------------------------|-------------------------|------------------------------|
|                                                                     |                                   |                                                                                        |                                                                                  | <b>Absolute values (where available) and OR/HR/RR</b>                                                                                                  |                                                                                              |                         |                         |                              |
|                                                                     |                                   | Sex = NR for sub cohort                                                                | screening / surveillance colonoscopies (Time NR)                                 | 3.6 (2.8, 4.5; p0.0001)                                                                                                                                | 5.2 (1.8, 15.1; 0.03)                                                                        |                         |                         |                              |
| Huang 2012a                                                         | Retrospective cohort              | N= 1794<br>Age = Mean NR<br><50: 40%<br>50-60: 29%<br>>60 years: 30%<br>Sex = 64% Male | FS combined (had "at least one surveillance"), 2.67 years                        |                                                                                                                                                        | Interval CRC<br><10 mm: 1 (n4/28.6%)<br>≥ 10mm: (n10/71.4%)<br>1.44 (0.35 - 5.94)<br>p=0.612 |                         |                         | Moderate risk of bias        |
| Huang 2010                                                          | Retrospective cohort              | N= 1356<br>Age = 52.4 (±12.5) (range 20– 84 years)<br>Sex = 63.6% male                 | FS SS subsequent - data on cumulative recurrence 1 – 20 years.                   | {vs =/-10mm} (n149/20.2%) adenoma=/+20 mm (n163/81.1%) (HR 2.35; 95% CI 1.09–5.06) p=0.029<br>10-19mm (n147/35.1%) (HR 1.25; 95% CI 0.60–2.62) p=0.584 |                                                                                              |                         |                         | Low risk of bias             |
| Jang 2015                                                           | Retrospective cohort              | N = 434<br>Age = 61.0 +/- 8.6<br>Sex = 77.4% Male                                      | FS more than 1 year since index                                                  | n/s p=0.055                                                                                                                                            |                                                                                              |                         |                         | Low risk of bias             |
| Laiyamo 2008 (Laiyamo 2011; Laiyamo 2012; Laiyamo 2013; Leung 2010) | Prospective cohort (from the PPT) | N = 1905<br>Age = 61.1 (9.9)<br>Sex = 64.5% Male                                       | 4 years (end of trial). (follow up data at 6.2 years after the end of the trial) | Size ≥1 cm (ref <1 cm 67/1204) RR AA (44/560) v NAA (167/560) 1.06 (0.69-1.61); AA v No A (349/560) 0.93 (0.61-1.41)                                   |                                                                                              |                         |                         | Low to moderate risk of bias |
| Lee 2017                                                            | Retrospective cohort              | N= 399<br>Age = 56.6±9.3<br>Sex = 69.7% Male                                           | FS at 3 or 5 years                                                               | UV analysis OR (95%CI): Large (≥10 mm) 1.501 (0.589-3.827) P=0.395;<br>MV analysis: 1.441 (0.538-3.860) P=0.468                                        |                                                                                              |                         |                         | Moderate risk of bias        |



| First author, year | Study design                               | Participants Age (M, SD unless otherwise specified) and Sex                                                                                                                                                                                                         | Follow up times                                                                                                                            | Incidence of AA at next surv (*indicates AN)                                                                                                                                                                                                                                                                                                   | Incidence CRC at next surv | Long term CRC incidence | Long term CRC mortality | Level of evidence (QUIPS) |
|--------------------|--------------------------------------------|---------------------------------------------------------------------------------------------------------------------------------------------------------------------------------------------------------------------------------------------------------------------|--------------------------------------------------------------------------------------------------------------------------------------------|------------------------------------------------------------------------------------------------------------------------------------------------------------------------------------------------------------------------------------------------------------------------------------------------------------------------------------------------|----------------------------|-------------------------|-------------------------|---------------------------|
|                    |                                            |                                                                                                                                                                                                                                                                     |                                                                                                                                            | <b>Absolute values (where available) and OR/HR/RR</b>                                                                                                                                                                                                                                                                                          |                            |                         |                         |                           |
| *Lee 2013          | Retrospective cohort study                 | N = 1760 patients with high-risk adenoma detected at index colonoscopy<br>Age = 65.8±3.5<br>Sex = 76% Male                                                                                                                                                          | 1 year – mean interval between index and surveillance 387 (SD = 89) days                                                                   | *MV OR (95% CI)<br>Size NS one or more very large (≥ 40 mm) adenomas (P = 0.160)                                                                                                                                                                                                                                                               |                            |                         |                         | Moderate risk of bias     |
| *Martinez 2009     | Pooled analysis of 8 retrospective studies | N = 9167<br>Age = Mean 62.0<br>Sex = 71.2% male                                                                                                                                                                                                                     | Median follow-up was 47.2 months, range 36.9 to 59.0                                                                                       | *Size <5mm is reference (AA 7.7% (95%CI 6.6–8.7) CRC 0.5 (0.2–0.8).<br><br>5-<10mm (AA 8.7 (7.7–9.7) CRC 0.5 (0.2–0.7) adjusted<br><b>OR 1.17 (0.95-1.42)</b> ;<br>10-<20mm (AA 15.9% (95%CI 14.5–17.4) CRC 0.8 (0.5–1.2)<br><b>OR 2.27 (1.84-2.78)</b> ;<br>20+mm (AA 19.3% (95%CI 16.4–22.3) CRC 1.2 (0.4–2.0)<br><b>OR 2.99 (2.24-4.00)</b> |                            |                         |                         | Low risk of bias.         |
| Nusko 2008         | Prospective cohort                         | N = 1091<br>Age = 57.06<br>Sex = 64.16%                                                                                                                                                                                                                             | Up to 4 surveillance intervals.(at 2 or 4 yr intervals)                                                                                    | Numbers and % of patients with size +/-10mm at index and each surveillance, plus p value for difference between numbers at each time point.<br>Index n 273 (47.6%)<br>1st rec n = 98 (17.1%)<br>p<0.00001                                                                                                                                      |                            |                         |                         | High risk of bias         |
| *Park 2016         | Retrospective cohort study                 | N = 1479 (high-risk adenoma at index and last surveillance ≥ 2.5 years after index).<br>Age = Group 1, < 50 years (n = 233)<br>Group 2, 50–69 years (n = 1000)<br>Group 3, ≥70 years (n = 246)<br>Sex = Group 1 75.1% Male, Group 2 74.6% Male, Group 3 69.5% Male. | Mean time to the last colonoscopic surveillance was about 4 years. Groups 1, 2, and 3 (4.1 ± 1.4, 4.0 ± 1.4, and 4.0 ± 1.5, respectively). | *HR (95% CI):<br>Size =/+10mm <b>1.81 (1.28-2.55)</b><br><b>=/+3 1.25 (0.91-1.72)</b>                                                                                                                                                                                                                                                          |                            |                         |                         | Moderate risk of bias     |





| First author, year                                                                                                                                                      | Study design                                  | Participants Age (M, SD unless otherwise specified) and Sex                                                                                                                                                                                                                                      | Follow up times                                                                                                                                        | Incidence of AA at next surv (*indicates AN)                                                                                                                                                                                                                                                                                                                                                                                                                                      | Incidence CRC at next surv                                                                                              | Long term CRC incidence                                                                                                | Long term CRC mortality | Level of evidence (QUIPS) |
|-------------------------------------------------------------------------------------------------------------------------------------------------------------------------|-----------------------------------------------|--------------------------------------------------------------------------------------------------------------------------------------------------------------------------------------------------------------------------------------------------------------------------------------------------|--------------------------------------------------------------------------------------------------------------------------------------------------------|-----------------------------------------------------------------------------------------------------------------------------------------------------------------------------------------------------------------------------------------------------------------------------------------------------------------------------------------------------------------------------------------------------------------------------------------------------------------------------------|-------------------------------------------------------------------------------------------------------------------------|------------------------------------------------------------------------------------------------------------------------|-------------------------|---------------------------|
|                                                                                                                                                                         |                                               |                                                                                                                                                                                                                                                                                                  |                                                                                                                                                        | <b>Absolute values (where available) and OR/HR/RR</b>                                                                                                                                                                                                                                                                                                                                                                                                                             |                                                                                                                         |                                                                                                                        |                         |                           |
| Solakoglu 2017                                                                                                                                                          | Prospective Cohort                            | N = 47<br>Age = 55.81 ± 10.84<br>Sex = 72.3%                                                                                                                                                                                                                                                     | 3 years                                                                                                                                                | Size (≥1cm vs. <1 cm) MV OR: 1.330, 95%CI: 0.818, 2.162, p = 0.667                                                                                                                                                                                                                                                                                                                                                                                                                |                                                                                                                         |                                                                                                                        |                         | High risk of bias         |
| *Van Heijninge n 2013                                                                                                                                                   | Retrospective cohort study                    | N=2990<br>Age = 61.3<br>Sex = 1647 (55%) Male.                                                                                                                                                                                                                                                   | FS Median 24 months (IQR 12-40m)<br>Mean number of surveillances 1.7 (range 1-5)                                                                       | *MV OR (95%CI)<br>Size =>10mm (AA 88 (7.5%; CRC 20 (1.7%))<br>OR 1.7 (1.2-3.2)                                                                                                                                                                                                                                                                                                                                                                                                    |                                                                                                                         |                                                                                                                        |                         | Moderate risk of bias     |
| <b>CQ1.4 Polyp: Number of adenomas (variants: 1,2,3,4,5-9,10+; the main categories may be 1-2, 3-4 and 5+ but we would like to capture all reported variations) N/a</b> |                                               |                                                                                                                                                                                                                                                                                                  |                                                                                                                                                        |                                                                                                                                                                                                                                                                                                                                                                                                                                                                                   |                                                                                                                         |                                                                                                                        |                         |                           |
| Atkin 2017                                                                                                                                                              | Retrospective, multicentre, cohort study      | N = 11 944 patients with data available for analysis; 4608 attended one or more surveillance visits and 7336 patients did not attend surveillance. Age = Median age 66.7 years (IQR 58.4-74.0) <55yrs 2122 (18%); 55-64yrs 3179 (27%); 65-74yrs 3957 (33%); 75+ys 2686 (22%)<br>Sex = 55.47 Male | FS or more (All surveillance intervals, 0, 1, 2 3+, plus comparisons of no surveillance v surveillance) Median follow up time 7.9 years, (IQR 5-11.1), | UV Ref 1 adenoma (n470/15.13%) OR (95%)(n=4608)<br>2 (n211/18.33%) 1.26 (1.05 to 1.51)<br>3 (n25/10.42%) 0.65 (0.43 to 1.00)<br>4 (n17/15.45%) 1.03 (0.61 to 1.74)<br><br>MV FS: Model 1 interval as categorical<br>Number of adenomas, 1 (ref)<br>2 1.25 (1.02 to 1.54)<br>3 1.22 (0.76 to 1.96)<br>4 2.05 (1.14 to 3.67)<br><br>MV FS: Model 2 interval as continuous<br>Number of adenomas, 1 (ref)<br>2 1.25 (1.02 to 1.53)<br>3 1.22 (0.76 to 1.96)<br>4 2.05 (1.14 to 3.67) | UV Ref 1 adenoma (n62/2.00%) OR (n=4608) (95%)<br>2 (n21/1.82%) 0.91 (0.55 to 1.50)<br>3 (n1/0.42%) 0.21 (0.03 to 1.49) | UV HR (95% CI): (n=11944) (vs1 n143/7842)<br>2 (n57/3073): 1.12 (0.82-1.52); 3 or 4 (n10/1029) 0.58 (0.31-1.11) p=0.12 |                         | Low risk of bias          |
| Coleman 2015                                                                                                                                                            | Retrospective cohort with nested case control | N= 6972<br>Age = 62.3 (13.1)<br>Sex = 54.7 Male                                                                                                                                                                                                                                                  | Study conducted over a 6 year time period                                                                                                              |                                                                                                                                                                                                                                                                                                                                                                                                                                                                                   | MV HR vref 1 (5414/161)<br>2 or more (1558/32)<br>0.67 (0.45-0.97)                                                      |                                                                                                                        |                         | Low risk of bias          |



| First author, year              | Study design               | Participants Age (M, SD unless otherwise specified) and Sex                                                                                                       | Follow up times                                                                    | Incidence of AA at next surv (*indicates AN)                                                                                                  | Incidence CRC at next surv                                                                                                                                                         | Long term CRC incidence | Long term CRC mortality                                                                                      | Level of evidence (QUIPS) |  |
|---------------------------------|----------------------------|-------------------------------------------------------------------------------------------------------------------------------------------------------------------|------------------------------------------------------------------------------------|-----------------------------------------------------------------------------------------------------------------------------------------------|------------------------------------------------------------------------------------------------------------------------------------------------------------------------------------|-------------------------|--------------------------------------------------------------------------------------------------------------|---------------------------|--|
|                                 |                            |                                                                                                                                                                   |                                                                                    | <b>Absolute values (where available) and OR/HR/RR</b>                                                                                         |                                                                                                                                                                                    |                         |                                                                                                              |                           |  |
| Cottet 2012                     | Retrospective cohort study | N= 5779<br>Age = 61.1 (12.9) years in men; 62.2 (13.6) years in women (p<0.001).<br><60 years: 41%<br>60-79: 50.8%<br>=/+80 8.2%<br>Sex = 58.4% Male              | FS Median follow up 7.7 year (IQR -5.2-10.5)                                       |                                                                                                                                               | AA at index: SIR (95% CI)<br>1 adenoma 2.32 (1.62-3.21)<br>2 or more 2.07 (1.21 to 3.32)<br><br>Non AA at index:<br>1 adenoma 0.71 (0.44 to 1.10)<br>2 or more 0.59 (0.21 to 1.28) |                         |                                                                                                              | Low risk of bias          |  |
| *Cubiella 2016                  | Retrospective cohort study | N = 5401 (2022 HR group; 3379 IR group)<br>Age = 60-69yr; HR 842 (60%); IR 1241 (58.2%); 50-59yrs; HR 562 (40%) IR 891 (41.8%).<br>Sex = Male HR 74.9%; IR 67.4%. | Mean follow up 2.8 years (SD 1 yr) for 65% of study population                     | *Number%: <3: 11.4 (9.9-12.9; 3-4: 14.8 (12.7-16.8); 5-9: 18.4 (15.5-21.4)<br>OR 3-4 (ref <3) 1.3 (1.0-1.7);<br>OR 5-9 (ref <3) 1.7 (1.2-2.3) |                                                                                                                                                                                    |                         |                                                                                                              | High risk of bias         |  |
| Emilsson 2017 (and Loberg 2014) | Retrospective cohort       | N= 90,864<br>Age = median 67.7yr)<br>40-49 (7.9%)<br>50-59 (19.7%)<br>60-69 (29.4%)<br>70-79 (29.3%)<br>=/+ 80 (13.7%)<br>Sex = 51.5 Male                         | Long term follow up - Median follow-up was 7.2 years                               |                                                                                                                                               |                                                                                                                                                                                    |                         | UV analysis<br>HR(95%CI):<br>=/+2 (v 1) 1.40 (1.21-1.63) P<0.01.<br>MV analysis:<br>1.30 (1.10-1.55) P<0.01. | Low risk of bias          |  |
| Facciorusso 2016a b             | Retrospective cohort       | n = 843<br>Age: Median 58 (IQR 52-67)<br>Sex: 61.9% Male)                                                                                                         | FS at 3 years.                                                                     | UV OR Number of ACAs >1 (ref 1): 2.69 (1.88-4.53) p<0.001<br>MV Number of ACAs >1 (ref 1): 3.22 (2.19-5.39) p<0.001                           |                                                                                                                                                                                    |                         |                                                                                                              | Low risk of bias          |  |
| Fairley 2014                    | Retrospective cohort       | N= 3300<br>Age = NR for sub cohort<br>Sex = NR for sub cohort                                                                                                     | FS+ (all patients had one or more screening / surveillance colonoscopies (Time NR) | number 3 or more vs 1 or 2: OR (95%CI)<br>2.4 (1.9, 3.0; p<0.0001)                                                                            | number 3 or more vs 1 or 2: OR (95%CI)<br>4.3 (1.4, 12.9; 0.01)                                                                                                                    |                         |                                                                                                              | Low risk of bias          |  |
| Huang 2012                      | Retrospective cohort -     | N = 197<br>Age = 52 +/- 6.4                                                                                                                                       | FS- 5 years                                                                        | 2 or fewer adenomas (ref)                                                                                                                     |                                                                                                                                                                                    |                         |                                                                                                              | Low risk of bias          |  |



| First author, year          | Study design                                   | Participants Age (M, SD unless otherwise specified) and Sex                                                               | Follow up times                                                                  | Incidence of AA at next surv (*indicates AN)                                                                                           | Incidence CRC at next surv                                                                                                                                              | Long term CRC incidence | Long term CRC mortality | Level of evidence (QUIPS)    |
|-----------------------------|------------------------------------------------|---------------------------------------------------------------------------------------------------------------------------|----------------------------------------------------------------------------------|----------------------------------------------------------------------------------------------------------------------------------------|-------------------------------------------------------------------------------------------------------------------------------------------------------------------------|-------------------------|-------------------------|------------------------------|
|                             |                                                |                                                                                                                           |                                                                                  | <b>Absolute values (where available) and OR/HR/RR</b>                                                                                  |                                                                                                                                                                         |                         |                         |                              |
|                             | data for the sub cohort with baseline adenomas | Sex = NR for sub cohort                                                                                                   |                                                                                  | 3 or more adenomas: 13 (33.3%) RR 1.24 (1.22-5.10) p 0.018                                                                             |                                                                                                                                                                         |                         |                         |                              |
| Huang 2012a                 | Retrospective cohort                           | N= 1794<br>Age = Mean NR<br><50: 40%<br>50-60: 29%<br>>60 years: 30%<br>Sex = 64% Male                                    | FS combined (had "at least one surveillance"), 2.67 years                        |                                                                                                                                        | Interval CRC<br><2: 1 (n8/57.1%)<br>≥ 3: (n6/42.9%) 0.37 (0.98 - 1.42) p=0.142                                                                                          |                         |                         | Low risk of bias             |
| Huang 2010                  | Retrospective cohort                           | N= 1356<br>Age = 52.4 (±12.5) (range 20- 84 years)<br>Sex = 63.6% male                                                    | FS SS subsequent - data on cumulative recurrence 1 - 20 years.                   | multiple adenomas vs<br>1 (n37/4.6%); 2 (n15/ 6.1%)<br>(HR 1.92 (1.04-3.54) p=0.037)<br>=/+3 (n70/23.0%) (HR 1.87 (1.12-3.10) p= 0.016 |                                                                                                                                                                         |                         |                         | Low risk of bias             |
| Jang 2015                   | Retrospective cohort                           | N = 434<br>Age = 61.0 +/- 8.6<br>Sex = 77.4% Male                                                                         | FS more than 1 year since index                                                  | MV OR 1.150 (1.069-1.237) (higher number of adenomas)                                                                                  |                                                                                                                                                                         |                         |                         | Low risk of bias             |
| *Jung 2016                  | Retrospective cohort study                     | N = 1646<br>Age = HRF =>3: 61.7 (10.4); HRF =<2: 59.3 (9.7) years.<br>Sex = Male HRF =>3: 340 (73.4%); HRF =<2: 876 (74%) | FS: HRF =>3: 4.0 years (range 2.5-11); HRF =<2: 4.1 years (range 2.5-10.9)       | *HR (95%CI)<br>3 or more adenomas 1.10 (0.84-1.43)                                                                                     |                                                                                                                                                                         |                         |                         | Moderate risk of bias        |
| Laish 2017                  | Retrospective cohort                           | N=1165<br>Age = 62.4±9.6<br>Sex = 54.2% male                                                                              | Interval between procedures was at least 1 year and less than 5 years            | 1-2 NAAs reference:<br>≥3 NAAs OR 2.32 (1.63-3.54);<br>MAAs 3.11 (1.90-5.09)                                                           | 1-2 NAAs 5/470 (1.1%) of which 3 were IMC and 2 were invasive; ≥3 NAAs 2/74 (2.7%) of which 1 was IMC and 1 was invasive; MAAs 4/109 (3.7%) of which all were invasive. |                         |                         | Low risk of bias             |
| Laiyamo 2008 (Laiyamo 2011; | Prospective cohort (from the PPT)              | N = 1905<br>Age = 61.1 (9.9)<br>Sex = 64.5% Male                                                                          | 4 years (end of trial). (follow up data at 6.2 years after the end of the trial) | ≥3 (ref =/<2: 97/1623) AA (28/282) v NAA (142/282) RR 1.06 (0.62-1.55); AA v No A (112/282) RR 1.46 (0.96-2.22)                        |                                                                                                                                                                         |                         |                         | Low to moderate risk of bias |



| First author, year                      | Study design                               | Participants Age (M, SD unless otherwise specified) and Sex                                                | Follow up times                                                          | Incidence of AA at next surv (*indicates AN)                                                                                                                                                                                                                                                                                                  | Incidence CRC at next surv | Long term CRC incidence | Long term CRC mortality | Level of evidence (QUIPS) |
|-----------------------------------------|--------------------------------------------|------------------------------------------------------------------------------------------------------------|--------------------------------------------------------------------------|-----------------------------------------------------------------------------------------------------------------------------------------------------------------------------------------------------------------------------------------------------------------------------------------------------------------------------------------------|----------------------------|-------------------------|-------------------------|---------------------------|
|                                         |                                            |                                                                                                            |                                                                          | <b>Absolute values (where available) and OR/HR/RR</b>                                                                                                                                                                                                                                                                                         |                            |                         |                         |                           |
| Laiyamo 2012; Laiyamo 2013; Leung 2010) |                                            |                                                                                                            |                                                                          |                                                                                                                                                                                                                                                                                                                                               |                            |                         |                         |                           |
| Lee 2017                                | Retrospective cohort                       | N= 399<br>Age = 56.6±9.3<br>Sex = 69.7% Male                                                               | FS at 3 or 5 years (comparison)                                          | MV analysis OR (95%CI)<br>Multiple (≥2) 2.051 (0.790-5.324) P=0.140<br>MV analysis: 1.963 (0.705-5.467) P=0.197                                                                                                                                                                                                                               |                            |                         |                         | Moderate risk of bias     |
| *Lee 2013                               | Retrospective cohort study                 | N = 1760 patients with high-risk adenoma detected at index colonoscopy<br>Age = 65.8±3.5<br>Sex = 76% Male | 1 year – mean interval between index and surveillance 387 (SD = 89) days | *MV OR (95% CI)<br>Number NS - one or more large (≥ 10 mm) adenomas (P = 0.860)<br>Number Ns multiple (≥ 10) adenomas (P = 0.395)                                                                                                                                                                                                             |                            |                         |                         | Moderate risk of bias     |
| *Martinez 2009                          | Pooled analysis of 8 retrospective studies | N = 9167<br>Age = Mean 62.0<br>Sex = 71.2% male                                                            | Median follow-up was 47.2 months, range 36.9 to 59.0                     | *Number 1 is reference (AA 8.6% (95%CI 7.8–9.3) CRC 0.5 (0.4–0.7)<br>2: AA 12.7% (11.3–14.1) CRC 0.5% (0.2–0.9)<br>OR 1.39 (1.17–1.66)<br>3: AA 15.3% (12.9–17.6) CRC 1.1% (0.4–1.8)<br>OR 1.85 (1.46–2.34)<br>4: AA 19.6% (15.3–23.9) CRC 1.2 (0.0–2.4) OR 2.41 (1.71–3.40)<br>5+: AA 24.1 (19.8–28.5) CRC 0.8 (0.0–1.7) OR 3.87 (2.76–5.42) |                            |                         |                         | Low risk of bias          |
| Solakoglu 2017                          | Prospective Cohort                         | N = 47<br>Age = 55.81 ±10.84<br>Sex = 72.3%                                                                | 3 years                                                                  | Number (per 1 increase): MV OR: 2.318, 95%CI: 0.415, 0.384, p = 0.445                                                                                                                                                                                                                                                                         |                            |                         |                         | High risk of bias         |
| *Van Heijninge n 2013                   | Retrospective cohort study                 | N=2990<br>Age = 61.3<br>Sex = 1647 (55%) Male.                                                             | FS Median 24 months (IQR 12-40m)                                         | *MV OR (95%CI)<br>Number (1 ref: AA n=83; 4%) CRC n = 25; 1.2%):                                                                                                                                                                                                                                                                              |                            |                         |                         | Moderate risk of bias     |



| First author, year                                                                                    | Study design                             | Participants Age (M, SD unless otherwise specified) and Sex                                                                                                                                                                                                                                                           | Follow up times                                                                                                                                          | Incidence of AA at next surv (*indicates AN)                                                                                                                                                                                                                                                                        | Incidence CRC at next surv                                                                             | Long term CRC incidence                                                                                                                                                                                  | Long term CRC mortality | Level of evidence (QUIPS) |
|-------------------------------------------------------------------------------------------------------|------------------------------------------|-----------------------------------------------------------------------------------------------------------------------------------------------------------------------------------------------------------------------------------------------------------------------------------------------------------------------|----------------------------------------------------------------------------------------------------------------------------------------------------------|---------------------------------------------------------------------------------------------------------------------------------------------------------------------------------------------------------------------------------------------------------------------------------------------------------------------|--------------------------------------------------------------------------------------------------------|----------------------------------------------------------------------------------------------------------------------------------------------------------------------------------------------------------|-------------------------|---------------------------|
|                                                                                                       |                                          |                                                                                                                                                                                                                                                                                                                       |                                                                                                                                                          | <b>Absolute values (where available) and OR/HR/RR</b>                                                                                                                                                                                                                                                               |                                                                                                        |                                                                                                                                                                                                          |                         |                           |
|                                                                                                       |                                          |                                                                                                                                                                                                                                                                                                                       | Mean number of surveillances 1.7 (range 1-5)                                                                                                             | 2: (AA 39; 7%; CRC 9; 1.6%)<br><b>OR 1.6 (1.1-2.4)</b><br>3: (AA 21; 8.7%; CRC 4; 1.6%)<br><b>OR 2.1 (1.3-3.4)</b><br>4: (AA 8 (11.7%) CRC 0)<br><b>OR 2.0 (0.9-4.6)</b><br>5+ (AA 14 (17.7%) CRC 0)<br><b>OR 3.3 (1.7-6.6)</b>                                                                                     |                                                                                                        |                                                                                                                                                                                                          |                         |                           |
| *Vemulapalli 2014                                                                                     | Retrospective cohort study               | N=1414<br>Age = (split by 5 groups increasing in risk) Grp 1: 56.7 (10.4); Grp 2: 60.6 (9.4); Grp 3: 62.3 (9.4); Grp 4: 61.3 (11.3); Grp 5: 64.7 (10.2).<br>Sex = Male Grp 1: 51.4%; Grp 2: 64.4%; Grp 3: 67.7%; Grp 4: 52.7%; Grp 5: 62.6%.                                                                          | FS >200 days and less than 3 years.                                                                                                                      | UV OR(95% CI)<br>Number:<br>1-2 <10mm (ref);<br>3-4 <10mm <b>1.2 (0.4-3.4)</b><br>=>5 <10mm <b>3.1 (1.2-8.2)</b><br>3-4 with 1 =>10mm <b>5.6 (2.1-15.1)</b><br>=>5 with 1 =>10mm <b>10.8 (4.5-25.7)</b>                                                                                                             |                                                                                                        |                                                                                                                                                                                                          |                         | Moderate risk of bias     |
| <b>CQ1.5 Polyp: Presence of adenoma in proximal colon Polyp: Absence of adenoma in proximal colon</b> |                                          |                                                                                                                                                                                                                                                                                                                       |                                                                                                                                                          |                                                                                                                                                                                                                                                                                                                     |                                                                                                        |                                                                                                                                                                                                          |                         |                           |
| Atkin 2017                                                                                            | Retrospective, multicentre, cohort study | N = <b>11 944</b> patients with data available for analysis; <b>4608</b> attended one or more surveillance visits and <b>7336</b> patients did not attend surveillance. Age = Median age 66.7 years (IQR 58.4–74.0) <55yrs 2122 (18%); 55-64yrs 3179 (27%); 65-74yrs 3957 (33%); 75+ys 2686 (22%)<br>Sex = 55.47 Male | FS or more (All surveillance intervals, 0, 1, 2 3+, plus comparisons of no surveillance v surveillance) Median follow up time 7-9 years, (IQR 5-6–11.1), | UV Ref Not in Proximal (n519/15.60%) OR (95%)(n=4608)<br><b>Proximal (n204/15.91%) 1.02 (0.86 to 1.22)</b><br><br>MV FS: Model 1 interval as categorical<br>Proximal polyp, No (ref)<br>Yes 1.28 (1.04 to 1.58)<br><br>MV FS: Model 2 interval as continuous<br>Proximal polyp, No (ref)<br>Yes 1.28 (1.04 to 1.58) | UV Ref Not in Proximal (n60/1.80%) OR (95%)(n=4608)<br><b>Proximal (n24/1.87%) 1.04 (0.64 to 1.67)</b> | UV HR (95% CI): (n=11944) (vs not proximal n137/8295)<br><b>Proximal (n73/3649) 1.38 (n=11944) (1.04-1.84) p= 0.0285</b><br>MV HR (95% CI): (vs not proximal) Proximal <b>1.76 (1.30–2.38) p= 0.0004</b> |                         | Low risk of bias          |
| Cottet 2012                                                                                           | Retrospective cohort study               | N= 5779<br>Age = 61.1 (12.9) years in men; 62.2 (13.6) years in women (p<0.001).<br><60 years: 41%<br>60-79: 50.8%                                                                                                                                                                                                    | FS Median follow up 7.7 year (IQR -5.2-10.5)                                                                                                             |                                                                                                                                                                                                                                                                                                                     | AA at index: SIR (95% CI)<br>Adenoma location<br><b>Proximal only 1.26 (0.25 to 3.67)</b>              |                                                                                                                                                                                                          |                         | Low risk of bias          |



| First author, year              | Study design                                                          | Participants Age (M, SD unless otherwise specified) and Sex                                                                               | Follow up times                                                | Incidence of AA at next surv (*indicates AN)                                              | Incidence CRC at next surv                                                                                                      | Long term CRC incidence | Long term CRC mortality                                                                                                                                         | Level of evidence (QUIPS) |
|---------------------------------|-----------------------------------------------------------------------|-------------------------------------------------------------------------------------------------------------------------------------------|----------------------------------------------------------------|-------------------------------------------------------------------------------------------|---------------------------------------------------------------------------------------------------------------------------------|-------------------------|-----------------------------------------------------------------------------------------------------------------------------------------------------------------|---------------------------|
|                                 |                                                                       |                                                                                                                                           |                                                                | <b>Absolute values (where available) and OR/HR/RR</b>                                     |                                                                                                                                 |                         |                                                                                                                                                                 |                           |
|                                 |                                                                       | =/+80 8.2%<br>Sex = 58.4% Male                                                                                                            |                                                                |                                                                                           | Distal only 2.08 (1.33 to 3.09)<br><br>Non AA at index:<br>Proximal only 0.63 (0.20 to 1.47)<br>Distal only 0.68 (0.34 to 1.22) |                         |                                                                                                                                                                 |                           |
| Emilsson 2017 (and Loberg 2014) | Retrospective cohort                                                  | N= 90,864<br>Age = median 67.7yr)<br>40-49 (7.9%)<br>50-59 (19.7%)<br>60-69 (29.4%)<br>70-79 (29.3%)<br>=/+ 80 (13.7%)<br>Sex = 51.5 Male | Long term follow up - Median follow-up was 7.2 years           |                                                                                           |                                                                                                                                 |                         | UV analysis HR(95%CI):<br>Proximal (v distal) 0.96 (0.71-1.30)P=0.78<br><br>UV analysis HR(95%CI):<br>Multiple or unspecified (v distal) 0.99 (0.79-1.24)P=0.94 | Low risk of bias          |
| Huang 2012                      | Retrospective cohort – data for the sub cohort with baseline adenomas | N = 197<br>Age = 52 +/- 6.4<br>Sex = NR for sub cohort                                                                                    | FS- 5 years                                                    | Any proximal is reference(10/13.5%). Distal only: 15 (14.3%), RR 0.76 (0.45-1.24) p=0.359 |                                                                                                                                 |                         |                                                                                                                                                                 | Low risk of bias          |
| Huang 2010                      | Retrospective cohort                                                  | N= 1356<br>Age = 52.4 (±12.5) (range 20- 84 years)<br>Sex = 63.6% male                                                                    | FS SS subsequent - data on cumulative recurrence 1 – 20 years. | v any proximal(n77/13.7%):<br>Distal only (n46/5.8%) (HR 0.77 (0.48-1.22) p=0.259         |                                                                                                                                 |                         |                                                                                                                                                                 | Low risk of bias          |
| Jang 2015                       | Retrospective cohort                                                  | N = 434<br>Age = 61.0 +/- 8.6<br>Sex = 77.4% Male                                                                                         | FS more than 1 year since index                                | n/s p=0.831                                                                               |                                                                                                                                 |                         |                                                                                                                                                                 | Low risk of bias          |
| Laiyamo 2008 (Laiyamo)          | Prospective cohort (from thePPT)                                      | N = 1905<br>Age = 61.1 (9.9)<br>Sex = 64.5% Male                                                                                          | 4 years (end of trial). (follow up data at 6.2                 | Proximal (ref distal 49/1030) AA (73/834) v NAA (316/834)                                 |                                                                                                                                 |                         |                                                                                                                                                                 | Low to moderate           |



| First author, year                                                                 | Study design                               | Participants Age (M, SD unless otherwise specified) and Sex                                                                     | Follow up times                                                                  | Incidence of AA at next surv (*indicates AN)                                                                                                                       | Incidence CRC at next surv | Long term CRC incidence | Long term CRC mortality | Level of evidence (QUIPS) |
|------------------------------------------------------------------------------------|--------------------------------------------|---------------------------------------------------------------------------------------------------------------------------------|----------------------------------------------------------------------------------|--------------------------------------------------------------------------------------------------------------------------------------------------------------------|----------------------------|-------------------------|-------------------------|---------------------------|
|                                                                                    |                                            |                                                                                                                                 |                                                                                  | <b>Absolute values (where available) and OR/HR/RR</b>                                                                                                              |                            |                         |                         |                           |
| 2011; Laiyamo 2012; Laiyamo 2013; Leung 2010                                       |                                            |                                                                                                                                 | years after the end of the trial)                                                | RR 1.58 (1.11-2.25); AA v No A (445/834) RR 1.84 (1.31-2.59)<br><br>Proximal only adenoma at baseline had increased risk of AA recurrence (RR=1.50, 0.99-2.27)     |                            |                         |                         | Low risk of bias          |
| Lee 2017                                                                           | Retrospective cohort                       | N= 399<br>Age = 56.6±9.3<br>Sex = 69.7% Male                                                                                    | FS at 3 or 5 years (comparison)                                                  | UV analysis OR (95%CI):<br>Proximal 0.608 (0.239-1.545)                                                                                                            |                            |                         |                         | Low risk of bias          |
| *Lee 2013                                                                          | Retrospective cohort study                 | N = 1760 patients with high-risk adenoma detected at index colonoscopy<br>Age = 65.8±3.5<br>Sex = 76% Male                      | 1 year - mean interval between index and surveillance 387 (SD = 89) days         | *MV OR (95% CI)<br>Proximal = 1.76 (1.13-2.74, p=0.012 (89/116 = 7.7%)<br>[27 (4.5%) of 606 vs 89 (7.7%) of 1154]                                                  |                            |                         |                         | Moderate risk of bias     |
| *Martinez 2009                                                                     | Pooled analysis of 8 retrospective studies | N = 9167<br>Age = Mean 62.0<br>Sex = 71.2% male                                                                                 | Median follow-up was 47.2 months, range 36.9 to 59.0                             | MV OR (95%CI)<br>*Distal is reference (AA 8.5% (95%CI 7.7-9.3) CRC 0.4 (0.2-0.6)<br>*Proximal only AA 11.8% (10.6-13.1) CRC 0.8% (0.5-1.2).<br>OR 1.68 (1.43-1.98) |                            |                         |                         | Low risk of bias          |
| Solakoglu 2017                                                                     | Prospective Cohort                         | N = 47<br>Age = 55.81 ±10.84<br>Sex = 72.3%                                                                                     | 3 years                                                                          | Distal, OR: 1.419, 95%CI: 0.143, 3.536, p = 1.000; Both, OR: 0.800, 95%CI: 0.080, 8.007, p = 0.567                                                                 |                            |                         |                         | High risk of bias         |
| *Van Heijninge n 2013                                                              | Retrospective cohort study                 | N=2990<br>Age = 61.3<br>Sex = 1647 (55%) Male.                                                                                  | FS Median 24 months (IQR 12-40m)<br>Mean number of surveillances 1.7 (range 1-5) | *MV OR (95%CI)<br>Proximal (AA 77/950 (8%); CRC 13/950 (1.4%))<br>OR 1.6 (1.2-2.3)                                                                                 |                            |                         |                         | Moderate risk of bias     |
| <b>CQ1.6 Polyp: Adenoma morphology (variants: pedunculated, sessile, flat) N/a</b> |                                            |                                                                                                                                 |                                                                                  |                                                                                                                                                                    |                            |                         |                         |                           |
| *Cubiella 2016                                                                     | Retrospective cohort study                 | N = 5401 (2022 HR group; 3379 IR group)<br>Age = 60-69yr; HR 842 (60%); IR 1241 (58.2%); 50-59yrs; HR 562 (40%) IR 891 (41.8%). | Mean follow up 2.8 years (SD 1 yr) for 65% of study population                   | *Flat%: No 13.0 (11.8-14.2); Yes 15.4 (12.0-18.7)<br>OR 1.2 (0.9-1.6)                                                                                              |                            |                         |                         | High risk of bias         |



| First author, year                                       | Study design                                                          | Participants Age (M, SD unless otherwise specified) and Sex                                                                                                                                                                                                                                                            | Follow up times                                                                                                                                                       | Incidence of AA at next surv (*indicates AN)                                                  | Incidence CRC at next surv                                                                                                                    | Long term CRC incidence                                                                                                                                     | Long term CRC mortality | Level of evidence (QUIPS) |
|----------------------------------------------------------|-----------------------------------------------------------------------|------------------------------------------------------------------------------------------------------------------------------------------------------------------------------------------------------------------------------------------------------------------------------------------------------------------------|-----------------------------------------------------------------------------------------------------------------------------------------------------------------------|-----------------------------------------------------------------------------------------------|-----------------------------------------------------------------------------------------------------------------------------------------------|-------------------------------------------------------------------------------------------------------------------------------------------------------------|-------------------------|---------------------------|
|                                                          |                                                                       |                                                                                                                                                                                                                                                                                                                        |                                                                                                                                                                       | <b>Absolute values (where available) and OR/HR/RR</b>                                         |                                                                                                                                               |                                                                                                                                                             |                         |                           |
|                                                          |                                                                       | Sex = Male HR 74.9%; IR 67.4%.                                                                                                                                                                                                                                                                                         |                                                                                                                                                                       |                                                                                               |                                                                                                                                               |                                                                                                                                                             |                         |                           |
| Facciorusso 2016a b                                      | Retrospective cohort                                                  | n = 843<br>Age: Median 58 (IQR 52-67)<br>Sex: 61.9% Male                                                                                                                                                                                                                                                               | FS at 3 years.                                                                                                                                                        | UV OR (95% CI) (ref pedunculated)<br>Sessile 1.96 (1.12-2.43)<br>nonpolypoid 2.43 (1.14-3.26) |                                                                                                                                               |                                                                                                                                                             |                         | Low risk of bias          |
| Huang 2012                                               | Retrospective cohort – data for the sub cohort with baseline adenomas | N = 197<br>Age = 52 +/- 6.4<br>Sex = NR for sub cohort                                                                                                                                                                                                                                                                 | FS- 5 years                                                                                                                                                           | Pedunculated is reference. Flat: 5 (14.7%)<br>RR 1.28 (0.95-2.26)                             |                                                                                                                                               |                                                                                                                                                             |                         | Low risk of bias          |
| Huang 2010                                               | Retrospective cohort                                                  | N= 1356<br>Age = 52.4 (±12.5) (range 20– 84 years)<br>Sex = 63.6% male                                                                                                                                                                                                                                                 | FS SS subsequent - data on cumulative recurrence 1 – 20 years.                                                                                                        | v's pedunculated (n86/7.8%):<br>Flat (n37/14.3%) (HR 1.48)<br>0.97-2.24 p=0.067               |                                                                                                                                               |                                                                                                                                                             |                         | Low risk of bias          |
| <b>CQ1.7 Patient: Male gender Patient: Female gender</b> |                                                                       |                                                                                                                                                                                                                                                                                                                        |                                                                                                                                                                       |                                                                                               |                                                                                                                                               |                                                                                                                                                             |                         |                           |
| Atkin 2017                                               | Retrospective, multicentre, cohort study                              | N = <b>11 944</b> patients with data available for analysis; <b>4608</b> attended one or more surveillance visits and <b>7336</b> patients did not attend surveillance. Age = Median age 66.7 years (IQR 58.4–74.0) <55yrs 2122 (18%); 55-64yrs 3179 (27%); 65-74yrs 3957 (33%); 75+yrs 2686 (22%)<br>Sex = 55.47 Male | Finding at FS (FS or more (All surveillance intervals, 0, 1, 2 3+, plus comparisons of no surveillance v surveillance) Median follow up time 7.9 years, (IQR 5–11.1). | UV Ref Male (n398/ 15.60% OR (95%)(n=4608)<br>Female (n325/15.80%)<br>1.02 (0.87-1.19)        | UV Ref Male OR (95%)(n=4608)<br>Female 0.72 (0.46-1.13)                                                                                       | UV HR (95% CI): (n=11944) (vs women n96/5319) men (n114/6625) 1.02 (0.77-1.33) p= 0.91<br>Multivariate HR (95% CI): (vs women) men 1.14 (0.86-1.50) p= 0.35 |                         | Low risk of bias          |
| Coleman 2015                                             | Retrospective cohort with nested case control                         | N= 6972<br>Age = 62.3 (13.1)<br>Sex =54.7 Male                                                                                                                                                                                                                                                                         | Study conducted over a 6 year time period                                                                                                                             |                                                                                               | MV HR ref female (3157/68):<br>Male (3815/125) 1.69 (1.26-2.27)                                                                               |                                                                                                                                                             |                         | Low risk of bias          |
| Cottet 2012                                              | Retrospective cohort study                                            | N= 5779<br>Age = 61.1 (12.9) years in men; 62.2 (13.6) years in women (p<0.001).<br><60 years: 41%<br>60-79: 50.8%<br>=/+80 8.2%<br>Sex = 58.4% Male                                                                                                                                                                   | FS Median follow up 7.7 year (IQR -5.2-10.5)                                                                                                                          |                                                                                               | AA at index: SIR (95% CI)<br>Gender<br>Men 2.08 (1.48 to 2.90)<br>Women 2.59 (1.65 to 4.06)<br><br>Non AA at index<br>Men 0.64 (0.40 to 1.03) |                                                                                                                                                             |                         | Low risk of bias          |

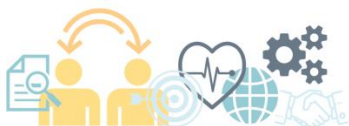



| First author, year              | Study design                                                          | Participants Age (M, SD unless otherwise specified) and Sex                                                                                                       | Follow up times                                                | Incidence of AA at next surv (*indicates AN)                                             | Incidence CRC at next surv                                                          | Long term CRC incidence | Long term CRC mortality                                                                      | Level of evidence (QUIPS) |
|---------------------------------|-----------------------------------------------------------------------|-------------------------------------------------------------------------------------------------------------------------------------------------------------------|----------------------------------------------------------------|------------------------------------------------------------------------------------------|-------------------------------------------------------------------------------------|-------------------------|----------------------------------------------------------------------------------------------|---------------------------|
|                                 |                                                                       |                                                                                                                                                                   |                                                                | <b>Absolute values (where available) and OR/HR/RR</b>                                    |                                                                                     |                         |                                                                                              |                           |
|                                 |                                                                       |                                                                                                                                                                   |                                                                |                                                                                          | Women <b>0.77 (0.40 to 1.48)</b>                                                    |                         |                                                                                              |                           |
| *Cubiella 2016                  | Retrospective cohort study                                            | N = 5401 (2022 HR group; 3379 IR group)<br>Age = 60-69yr; HR 842 (60%); IR 1241 (58.2%); 50-59yrs; HR 562 (40%) IR 891 (41.8%).<br>Sex = Male HR 74.9%; IR 67.4%. | Mean follow up 2.8 years (SD 1 yr) for 65% of study population | *Sex%: Female 11.5% (9.60-13.5) Male 14.7 (13.3-16.1) OR <b>1.1 (0.9-1.4)</b>            |                                                                                     |                         |                                                                                              | High risk of bias         |
| Emilsson 2017 (and Loberg 2014) | Retrospective cohort                                                  | N= 90,864<br>Age = median 67.7yr)<br>40-49 (7.9%)<br>50-59 (19.7%)<br>60-69 (29.4%)<br>70-79 (29.3%)<br>=/+ 80 (13.7%)<br>Sex = 51.5% Male                        | Long term follow up - Median follow-up was 7.2 years           |                                                                                          |                                                                                     |                         | UV analysis HR(95%CI):Male (v female) <b>1.01 (0.88-1.16)</b><br>MV: <b>0.89 (0.78-1.02)</b> | Low risk of bias          |
| Facciorusso 2016a b             | Retrospective cohort                                                  | n = 843<br>Age: Median 58 (IQR 52-67)<br>Sex: 61.9% Male)                                                                                                         | FS at 3 years.                                                 | UV OR (95% CI) (ref female) <b>1.47 (0.87-1.88)</b>                                      |                                                                                     |                         |                                                                                              | Low risk of bias          |
| Huang 2012a                     | Retrospective cohort                                                  | N= 1794<br>Age = Mean NR<br><50: 40%<br>50-60: 29%<br>>60 years: 30%<br>Sex = 64% Male                                                                            | FS combined (had "at least one surveillance"), 2.67 years      | -                                                                                        | Interval CRC<br>Male: 1 (n11/78.6%)<br>Female: <b>(n3/21.4%) 0.72 (0.19 - 2.69)</b> | -                       | -                                                                                            | Low risk of bias          |
| Huang 2010                      | Retrospective cohort                                                  | N= 1356<br>Age = 52.4 (±12.5) (range 20- 84 years)<br>Sex = 63.6% male                                                                                            | FS SS subsequent - data on cumulative recurrence 1 - 20 years. | v's Female(n18/3.7%): Male sex (n105/12.2%) ( <b>HR 2.11; 95% CI 1.27-3.53</b> ) p=0.004 |                                                                                     |                         |                                                                                              | Low risk of bias          |
| Huang 2012                      | Retrospective cohort - data for the sub cohort with baseline adenomas | N = 197<br>Age = 52 +/- 6.4<br>Sex = NR for sub cohort                                                                                                            | FS- 5 years                                                    | Women is reference. Male: n21 <b>RR 2.18 (1.13-3.06) p=0.003</b>                         |                                                                                     |                         |                                                                                              | Low risk of bias          |
| Jang 2015                       | Retrospective cohort                                                  | N = 434<br>Age = 61.0 +/- 8.6<br>Sex = 77.4% Male                                                                                                                 | FS more than 1 year since index                                | Male gender OR <b>2.757 (1.015-7.489)</b>                                                |                                                                                     |                         |                                                                                              | Low risk of bias          |



| First author, year                                                  | Study design                               | Participants Age (M, SD unless otherwise specified) and Sex                                                               | Follow up times                                                                                                                                                              | Incidence of AA at next surv (*indicates AN)                                                                                                                  | Incidence CRC at next surv | Long term CRC incidence                                                         | Long term CRC mortality | Level of evidence (QUIPS)    |
|---------------------------------------------------------------------|--------------------------------------------|---------------------------------------------------------------------------------------------------------------------------|------------------------------------------------------------------------------------------------------------------------------------------------------------------------------|---------------------------------------------------------------------------------------------------------------------------------------------------------------|----------------------------|---------------------------------------------------------------------------------|-------------------------|------------------------------|
|                                                                     |                                            |                                                                                                                           |                                                                                                                                                                              | <b>Absolute values (where available) and OR/HR/RR</b>                                                                                                         |                            |                                                                                 |                         |                              |
| *Jung 2016                                                          | Retrospective cohort study                 | N = 1646<br>Age = HRF =>3: 61.7 (10.4); HRF =<2: 59.3 (9.7) years.<br>Sex = Male HRF =>3: 340 (73.4%); HRF =<2: 876 (74%) | FS: HRF =>3: 4.0 years (range 2.5-11); HRF =<2: 4.1 years (range 2.5-10.9)                                                                                                   | HR (95%CI) Male <b>1.36 (0.97-1.92)</b>                                                                                                                       |                            |                                                                                 |                         | Moderate risk of bias        |
| Laiyamo 2008 (Laiyamo 2011; Laiyamo 2012; Laiyamo 2013; Leung 2010) | Prospective cohort (from the PPT)          | N = 1905<br>Age = 61.1 (9.9)<br>Sex = 64.5% Male                                                                          | 4 years (end of trial). (follow up data at 6.2 years after the end of the trial)                                                                                             | Male RR AA v NAA 1.22 (0.81-1.84); AA v No A RR 1.34 (0.90-2.01)                                                                                              |                            | Of the new cases diagnosed during the PPT-CFS, 78% (7/9) were diagnosed in men. |                         | Low to moderate risk of bias |
| Lee 2017                                                            | Retrospective cohort                       | N= 399<br>Age = 56.6±9.3<br>Sex = 69.7% Male                                                                              | FS at 3 or 5 years (comparison)                                                                                                                                              | UV analysis OR (95%CI):<br>Male sex <b>0.599 (0.195-1.845)</b><br>MV analysis: <b>0.884 (0.227-3.436)</b>                                                     |                            |                                                                                 |                         | Low risk of bias             |
| *Martinez 2009                                                      | Pooled analysis of 8 retrospective studies | N = 9167<br>Age = Mean 62.0<br>Sex = 71.2% male                                                                           | Median follow-up was 47.2 months, range 36.9 to 59.0                                                                                                                         | MV OR (95%CI)<br>*Female is reference (AA 9.8% (95%CI 8.7-10.9) CRC 0.3% (0.1-0.5)<br>Male AA 11.7% (10.9-12.5) CRC 0.8 (0.6-1.0). OR <b>1.40 (1.19-1.65)</b> |                            |                                                                                 |                         | Low risk of bias             |
| Morelli 2013 (Imperiale, 2014)                                      | Retrospective cohort                       | N = 965<br>Age = 57.8 (9.8)<br>Sex = 62% Male                                                                             | Mean (median) SD interval between index and first surveillance colonoscopies was 33.9 (36.3) 20.2 months; and 44.1 (38.5) 18.6 months between first and second surveillance. | Men v women: MV OR (95% CI)<br><b>FS 1.28 (0.79-2.08)</b>                                                                                                     |                            |                                                                                 |                         |                              |



| First author, year                                                            | Study design               | Participants Age (M, SD unless otherwise specified) and Sex                                                                                                                                                                                                                                                                                                              | Follow up times                                                                                                                                            | Incidence of AA at next surv (*indicates AN)                                | Incidence CRC at next surv                                                                        | Long term CRC incidence | Long term CRC mortality | Level of evidence (QUIPS) |
|-------------------------------------------------------------------------------|----------------------------|--------------------------------------------------------------------------------------------------------------------------------------------------------------------------------------------------------------------------------------------------------------------------------------------------------------------------------------------------------------------------|------------------------------------------------------------------------------------------------------------------------------------------------------------|-----------------------------------------------------------------------------|---------------------------------------------------------------------------------------------------|-------------------------|-------------------------|---------------------------|
| <b>Absolute values (where available) and OR/HR/RR</b>                         |                            |                                                                                                                                                                                                                                                                                                                                                                          |                                                                                                                                                            |                                                                             |                                                                                                   |                         |                         |                           |
| *Park 2016                                                                    | Retrospective cohort study | N = 1479 patients with high-risk adenoma detected at index colonoscopy who underwent their last colonoscopic surveillance $\geq 2.5$ years after index colonoscopy were identified.<br>Age = Group 1, < 50 years (n = 233)<br>Group 2, 50–69 years (n = 1000)<br>Group 3, $\geq 70$ years (n = 246)<br>Sex = Group 1 75.1% Male, Group 2 74.6% Male, Group 3 69.5% Male. | Mean time to the last colonoscopic surveillance was about 4 years. Groups 1, 2, and 3 ( $4.1 \pm 1.4$ , $4.0 \pm 1.4$ , and $4.0 \pm 1.5$ , respectively). | *HR (95% CI):<br>*Male sex 1.37 (0.91–2.08)                                 |                                                                                                   |                         |                         | Moderate risk of bias     |
| Pinsky 2009                                                                   | Retrospective cohort study | N = 2607<br>Age = 63 years<br>Sex = 60% Male                                                                                                                                                                                                                                                                                                                             | FS mean 3.4 - 4.3 yrs (depending on index adenoma)                                                                                                         | MV OR<br>Ref: Female<br>Male, 1.2 (0.9 to 1.8)                              |                                                                                                   |                         |                         |                           |
| Solakoglu 2017                                                                | Prospective Cohort         | N = 47 (high risk only)<br>Age = $55.81 \pm 10.84$<br>Sex = 72.3%                                                                                                                                                                                                                                                                                                        | 3 years                                                                                                                                                    | MV OR: Male 0.625, 95%CI: 0.063, 6.180, p = 0.517                           |                                                                                                   |                         |                         | High risk of bias         |
| Tae 2017                                                                      | Retrospective cohort study | N = 2904<br>Age = $57.5 \pm 9.0$<br>Sex = 71.3% Male                                                                                                                                                                                                                                                                                                                     | FS - Mean follow up period 3 years, patients underwent 1.3 surveillance colonoscopies                                                                      | Male gender associated with AA:<br>MV: OR (95% CI) 1.59 (1.09–2.34) p=0.017 |                                                                                                   |                         |                         | Moderate risk of bias.    |
| *Vemulapalli 2014                                                             | Retrospective cohort study | N=1414<br>Age = (split by 5 groups increasing in risk) Grp 1: 56.7 (10.4); Grp 2: 60.6 (9.4); Grp 3: 62.3 (9.4); Grp 4: 61.3 (11.3); Grp 5: 64.7 (10.2).<br>Sex = Male Grp 1: 51.4%; Grp 2: 64.4%; Grp 3: 67.7%; Grp 4: 52.7%; Grp 5: 62.6%.                                                                                                                             | FS >200 days and less than 3 years.                                                                                                                        | *UV OR(95% CI)<br>Male: 0.8 (0.4–1.4)                                       |                                                                                                   |                         |                         | Moderate risk of bias     |
| <b>CQ1.8 Patient: Family history of CRC Patient: NO Family history of CRC</b> |                            |                                                                                                                                                                                                                                                                                                                                                                          |                                                                                                                                                            |                                                                             |                                                                                                   |                         |                         |                           |
| Cottet 2012                                                                   | Retrospective cohort study | N = 5779<br>Age = 61.1 (12.9) years in men; 62.2 (13.6) years in women (p<0.001).<br><60 years: 41%                                                                                                                                                                                                                                                                      | FS Median follow up 7.7 year (IQR 5.2–10.5)                                                                                                                |                                                                             | AA at index: SIR (95% CI)<br>Known family history of colorectal cancer<br>Yes 3.76 (1.51 to 7.75) |                         |                         | Low risk of bias          |



| First author, year                                                  | Study design                               | Participants Age (M, SD unless otherwise specified) and Sex                                                                                                                                                                                   | Follow up times                                                                                                                            | Incidence of AA at next surv (*indicates AN)                                                                                                                                    | Incidence CRC at next surv                                                                                              | Long term CRC incidence                                                                   | Long term CRC mortality | Level of evidence (QUIPS)    |
|---------------------------------------------------------------------|--------------------------------------------|-----------------------------------------------------------------------------------------------------------------------------------------------------------------------------------------------------------------------------------------------|--------------------------------------------------------------------------------------------------------------------------------------------|---------------------------------------------------------------------------------------------------------------------------------------------------------------------------------|-------------------------------------------------------------------------------------------------------------------------|-------------------------------------------------------------------------------------------|-------------------------|------------------------------|
|                                                                     |                                            |                                                                                                                                                                                                                                               |                                                                                                                                            | <b>Absolute values (where available) and OR/HR/RR</b>                                                                                                                           |                                                                                                                         |                                                                                           |                         |                              |
|                                                                     |                                            | 60-79: 50.8%<br>=/+80 8.2%<br>Sex = 58.4% Male                                                                                                                                                                                                |                                                                                                                                            |                                                                                                                                                                                 | <b>No 2.10 (1.54 to 2.81)</b><br><br>Non AA at index<br><b>Yes 0.77 (0.09 to 2.77)</b><br><b>No 0.67 (0.43 to 1.00)</b> |                                                                                           |                         |                              |
| Jang 2015                                                           | Retrospective cohort                       | N = 434<br>Age = 61.0 +/- 8.6<br>Sex = 77.4% Male                                                                                                                                                                                             | FS more than 1 year since index                                                                                                            | <b>n/s p=0.108</b>                                                                                                                                                              |                                                                                                                         |                                                                                           |                         | Low risk of bias             |
| *Jung 2016                                                          | Retrospective cohort study                 | N = 1646<br>Age = HRF =>3: 61.7 (10.4); HRF =<2: 59.3 (9.7) years.<br>Sex = Male HRF =>3: 340 (73.4%); HRF =<2: 876 (74%)                                                                                                                     | FS: HRF =>3: 4.0 years (range 2.5-11); HRF =<2: 4.1 years (range 2.5-10.9)                                                                 | HR (95%CI)<br>Family history of CRC<br><b>0.92 (0.43-1.96)</b>                                                                                                                  |                                                                                                                         |                                                                                           |                         | Moderate risk of bias        |
| Laiyamo 2008 (Laiyamo 2011; Laiyamo 2012; Laiyamo 2013; Leung 2010) | Prospective cohort (from the PPT)          | N = 1905<br>Age = 61.1 (9.9)<br>Sex = 64.5% Male                                                                                                                                                                                              | 4 years (end of trial). (follow up data at 6.2 years after the end of the trial)                                                           |                                                                                                                                                                                 |                                                                                                                         | Of the new CRC cases diagnosed during the PPT-CFS, 44% (4/9) had a family history of CRC. |                         | Low to moderate risk of bias |
| *Martinez 2009                                                      | Pooled analysis of 8 retrospective studies | N = 9167<br>Age = Mean 62.0<br>Sex = 71.2% male                                                                                                                                                                                               | Median follow-up was 47.2 months, range 36.9 to 59.0                                                                                       | MV OR(95%CI)<br>*Family history of CRC. No is reference. (AA 11.0% (10.3-11.8) CRC 0.6% (0.4-0.8)<br>Yes AA 11.6% (10.3-13.0) CRC 0.6% (0.3-0.9).<br><b>OR 1.17 (0.99-1.38)</b> |                                                                                                                         |                                                                                           |                         | Low risk of bias.            |
| *Park 2016                                                          | Retrospective cohort study                 | N = 1479 patients with high-risk adenoma detected at index colonoscopy who underwent their last colonoscopic surveillance ≥ 2.5 years after index colonoscopy were identified.<br>Age = Group 1, < 50 years (n = 233)<br>Group 2, 50-69 years | Mean time to the last colonoscopic surveillance was about 4 years. Groups 1, 2, and 3 (4.1 ± 1.4, 4.0 ± 1.4, and 4.0 ± 1.5, respectively). | *HR (95% CI):<br>Family history of CRC <b>0.61 (0.23-1.67)</b>                                                                                                                  |                                                                                                                         |                                                                                           |                         | Moderate risk of bias        |



| First author, year                                                                                                                                                           | Study design                             | Participants Age (M, SD unless otherwise specified) and Sex                                                                                                                                                                                                                                                           | Follow up times                                                                                                                                          | Incidence of AA at next surv (*indicates AN)                                                                                                                                                                                                                                                                                                                                                                                                                                                                                                                                                                        | Incidence CRC at next surv                                                                                                                                                                                                                                                                                                                                                                                                                                | Long term CRC incidence                                                                                                                                                                                                                                                                                                                                       | Long term CRC mortality | Level of evidence (QUIPS) |  |
|------------------------------------------------------------------------------------------------------------------------------------------------------------------------------|------------------------------------------|-----------------------------------------------------------------------------------------------------------------------------------------------------------------------------------------------------------------------------------------------------------------------------------------------------------------------|----------------------------------------------------------------------------------------------------------------------------------------------------------|---------------------------------------------------------------------------------------------------------------------------------------------------------------------------------------------------------------------------------------------------------------------------------------------------------------------------------------------------------------------------------------------------------------------------------------------------------------------------------------------------------------------------------------------------------------------------------------------------------------------|-----------------------------------------------------------------------------------------------------------------------------------------------------------------------------------------------------------------------------------------------------------------------------------------------------------------------------------------------------------------------------------------------------------------------------------------------------------|---------------------------------------------------------------------------------------------------------------------------------------------------------------------------------------------------------------------------------------------------------------------------------------------------------------------------------------------------------------|-------------------------|---------------------------|--|
|                                                                                                                                                                              |                                          | (n = 1000)<br>Group 3, ≥70 years<br>(n = 246)<br>Sex = Group 1 75.1% Male,<br>Group 2 74.6% Male,<br>Group 3 69.5% Male.                                                                                                                                                                                              |                                                                                                                                                          | <b>Absolute values (where available) and OR/HR/RR</b>                                                                                                                                                                                                                                                                                                                                                                                                                                                                                                                                                               |                                                                                                                                                                                                                                                                                                                                                                                                                                                           |                                                                                                                                                                                                                                                                                                                                                               |                         |                           |  |
| Tae 2017                                                                                                                                                                     | Retrospective cohort study               | N = 2904<br>Age = 57.5 ± 9.0<br>Sex = 71.3% Male                                                                                                                                                                                                                                                                      | FS - Mean follow up period 3 years, patients underwent 1.3 surveillance colonoscopies                                                                    | MV: OR (95%CI) 0.284 1.69 (0.81-3.46) p=0.168                                                                                                                                                                                                                                                                                                                                                                                                                                                                                                                                                                       |                                                                                                                                                                                                                                                                                                                                                                                                                                                           |                                                                                                                                                                                                                                                                                                                                                               |                         | Moderate risk of bias.    |  |
| <b>CQ1.9 Patient: Younger age (e.g. &lt;55 vs 55+; there will be other variants of age cut-off and we would like to capture these too) Patient: NOT in Younger age range</b> |                                          |                                                                                                                                                                                                                                                                                                                       |                                                                                                                                                          |                                                                                                                                                                                                                                                                                                                                                                                                                                                                                                                                                                                                                     |                                                                                                                                                                                                                                                                                                                                                                                                                                                           |                                                                                                                                                                                                                                                                                                                                                               |                         |                           |  |
| Atkin 2017                                                                                                                                                                   | Retrospective, multicentre, cohort study | N = <b>11 944</b> patients with data available for analysis; <b>4608</b> attended one or more surveillance visits and <b>7336</b> patients did not attend surveillance. Age = Median age 66.7 years (IQR 58.4–74.0) <55yrs 2122 (18%); 55-64yrs 3179 (27%); 65-74yrs 3957 (33%); 75+ys 2686 (22%)<br>Sex = 55.47 Male | FS or more (All surveillance intervals, 0, 1, 2 3+, plus comparisons of no surveillance v surveillance) Median follow up time 7.9 years, (IQR 5.6–11.1), | UV Ref <55yr (n 107/ 10.44%)<br>OR (95%) (n=4608)<br>≥ 55 and <60 (n105/ 16.88%)<br>1.74 (1.30-2.33)<br>≥ 60 and < 65 (n116/ 14.72%)<br>1.48 (1.12 to 1.96)<br>≥ 65 and < 70 (n118/ 14.51%)<br>1.46 (1.10 to 1.93)<br>≥ 70 and < 75 (n137/ 19.19%)<br>2.04 (1.55 to 2.68)<br>≥ 75 and < 80 (n87 /21.07%)<br>2.29 (1.68 to 3.12)<br>≥ 80 (n53/ 22.75%) 2.53 (1.75 to 3.64)<br><br>MV Effects of age as a risk factor on AA incidence at FS: Model 1 interval as categorical<br>Age (years) < 55 (Ref)<br>≥ 55 and < 60 1.56 (1.14 to 2.13)<br>≥ 60 and < 65 1.37 (1.01 to 1.85)<br>≥ 65 and < 70 1.24 (0.91 to 1.68) | UV Ref <55yr OR (95%) (n=4608) (n8/ 0.78%)<br>≥ 55 and <60 (n2/ 0.32%) 0.41 (0.09 to 1.94)<br>≥ 60 and < 65 (n9 /1.14%) 1.47 (0.56 to 3.82)<br>≥ 65 and < 70 (n15 /1.85%) 2.39 (1.01 to 5.66)<br>≥ 70 and < 75 (n16 /2.24%) 2.91 (1.24 to 6.85)<br>≥ 75 and < 80 (n21 /5.08%) 6.81 (2.99 to 15.5)<br>≥ 80 (n13/ 5.58%) 7.51 (3.08 to 18.34)<br><br>MV FS: Model 1 interval as categorical<br>Age (years), < 55 (ref)<br>≥ 55 and < 60 0.20 (0.02 to 1.61) | UV HR (95% CI): (n=11944) (vs<55 n23/2122)<br>55-64 years (n39/3179) 1.33 (0.79-2.23) ;<br>65-74 years (n84/3957) 2.87 (1.80-4.57) p<0.0001<br>= /+75 (n64/2686) years 4.72 (2.90-7.67) p<0.0001<br><br>Multivariate HR (95% CI): (vs<55)<br>55-64 years 1.28 (0.77-2.15);<br>65-74 years 2.66 (1.66-4.24) p<0.0001<br>= /+75 years 3.82 (2.33-6.27) p<0.0001 |                         | Low risk of bias          |  |



| First author, year | Study design                                  | Participants Age (M, SD unless otherwise specified) and Sex                                                        | Follow up times                              | Incidence of AA at next surv (*indicates AN)                                                                                                                                                                                                                                                                                                                                                                                                                                                                      | Incidence CRC at next surv                                                                                                                                                                                                                                                                                                                                                                                                                                                                                                                                 | Long term CRC incidence | Long term CRC mortality | Level of evidence (QUIPS) |
|--------------------|-----------------------------------------------|--------------------------------------------------------------------------------------------------------------------|----------------------------------------------|-------------------------------------------------------------------------------------------------------------------------------------------------------------------------------------------------------------------------------------------------------------------------------------------------------------------------------------------------------------------------------------------------------------------------------------------------------------------------------------------------------------------|------------------------------------------------------------------------------------------------------------------------------------------------------------------------------------------------------------------------------------------------------------------------------------------------------------------------------------------------------------------------------------------------------------------------------------------------------------------------------------------------------------------------------------------------------------|-------------------------|-------------------------|---------------------------|
|                    |                                               |                                                                                                                    |                                              | <b>Absolute values (where available) and OR/HR/RR</b>                                                                                                                                                                                                                                                                                                                                                                                                                                                             |                                                                                                                                                                                                                                                                                                                                                                                                                                                                                                                                                            |                         |                         |                           |
|                    |                                               |                                                                                                                    |                                              | ≥ 70 and < 75 <b>1.74 (1.30 to 2.35)</b><br>≥ 75 and < 80 <b>1.81 (1.28 to 2.54)</b><br>≥ 80 <b>1.81 (1.21 to 2.70)</b><br><br>MV Effects of age as a risk factor on AA incidence at FS : Model 2 interval as continuous<br>Age (years) < 55 (Ref)<br>≥ 55 and < 60 <b>1.57 (1.15 to 2.15)</b><br>≥ 60 and < 65 <b>1.37 (1.01 to 1.86)</b><br>≥ 65 and < 70 <b>1.24 (0.92 to 1.68)</b><br>≥ 70 and < 75 <b>1.75 (1.30 to 2.35)</b><br>≥ 75 and < 80 <b>1.81 (1.28 to 2.54)</b><br>≥ 80 <b>1.81 (1.21 to 2.71)</b> | ≥ 60 and < 65 <b>1.18 (0.44 to 3.18)</b><br>≥ 65 and < 70 <b>1.86 (0.76 to 4.55)</b><br>≥ 70 and < 75 <b>2.11 (0.86 to 5.19)</b><br>≥ 75 and < 80 <b>5.92 (2.56 to 13.71)</b><br>≥ 80 <b>4.68 (1.81 to 12.07)</b><br><br>MV FS: Model 2 interval as continuous<br>Age (years), < 55 (ref)<br>≥ 55 and < 60 <b>0.20 (0.02 to 1.57)</b><br>≥ 60 and < 65 <b>1.16 (0.43 to 3.12)</b><br>≥ 65 and < 70 <b>1.86 (0.76 to 4.56)</b><br>≥ 70 and < 75 <b>2.18 (0.89 to 5.35)</b><br>≥ 75 and < 80 <b>6.21 (2.69 to 14.35)</b><br>≥ 80 <b>5.03 (1.96 to 12.94)</b> |                         |                         |                           |
| Coleman 2015       | Retrospective cohort with nested case control | N= 6972<br>Age = 62.3 (13.1)<br>Sex =54.7 Male                                                                     | Study conducted over a 6 year time period    |                                                                                                                                                                                                                                                                                                                                                                                                                                                                                                                   | MV HR vs <50(1,237/18):<br>50-<60 <b>1.27 (1609/29 1.8%) (0.71-2.29)</b><br>60-<70 <b>1.99 (1916/51 2.7%) (1.16-3.41)</b><br>70-<80 (1613/60 <b>3.7%</b> ) <b>3.10 (1.83-5.26)</b><br>80 or older (597/35 <b>5.9%</b> ) <b>6.16 (3.48-10.91)</b>                                                                                                                                                                                                                                                                                                           |                         |                         | Low risk of bias          |
| Cottet 2012        | Retrospective cohort study                    | N= 5779<br>Age = 61.1 (12.9) years in men; 62.2 (13.6) years in women (p<0.001).<br><60 years: 41%<br>60-79: 50.8% | FS Median follow up 7.7 year (IQR -5.2-10.5) |                                                                                                                                                                                                                                                                                                                                                                                                                                                                                                                   | AA at index: SIR (95% CI)<br>Age (years)<br><60 <b>3.65 1.88 to 6.37</b><br>60-79 <b>1.75 1.18 to 2.50</b><br>≥/>80 <b>3.32 1.66 to 5.95</b>                                                                                                                                                                                                                                                                                                                                                                                                               |                         |                         | Low risk of bias          |



| First author, year              | Study design               | Participants Age (M, SD unless otherwise specified) and Sex                                                                                                       | Follow up times                                                | Incidence of AA at next surv (*indicates AN)                                          | Incidence CRC at next surv                                                                     | Long term CRC incidence | Long term CRC mortality                                                                                                                                                                                                                                                                                                  | Level of evidence (QUIPS) |
|---------------------------------|----------------------------|-------------------------------------------------------------------------------------------------------------------------------------------------------------------|----------------------------------------------------------------|---------------------------------------------------------------------------------------|------------------------------------------------------------------------------------------------|-------------------------|--------------------------------------------------------------------------------------------------------------------------------------------------------------------------------------------------------------------------------------------------------------------------------------------------------------------------|---------------------------|
|                                 |                            |                                                                                                                                                                   |                                                                | <b>Absolute values (where available) and OR/HR/RR</b>                                 |                                                                                                |                         |                                                                                                                                                                                                                                                                                                                          |                           |
|                                 |                            | =/+80 8.2%<br>Sex = 58.4% Male                                                                                                                                    |                                                                |                                                                                       | Non AA at index<br><60 0.39 0.08 to 1.13<br>60-79 0.74 0.45 to 1.15<br>=/>80 0.84 0.17 to 2.44 |                         |                                                                                                                                                                                                                                                                                                                          |                           |
| *Cubiella 2016                  | Retrospective cohort study | N = 5401 (2022 HR group; 3379 IR group)<br>Age = 60-69yr; HR 842 (60%); IR 1241 (58.2%); 50-59yrs; HR 562 (40%) IR 891 (41.8%).<br>Sex = Male HR 74.9%; IR 67.4%. | Mean follow up 2.8 years (SD 1 yr) for 65% of study population | *Age%: 50-59yr 13.3 (11.5-15)<br>60-69 yr 14.1 (12.6-15.6)<br><b>OR 1.0 (0.8-1.2)</b> |                                                                                                |                         |                                                                                                                                                                                                                                                                                                                          | High risk of bias         |
| Emilsson 2017 (and Loberg 2014) | Retrospective cohort       | N= 90,864<br>Age = median 67.7yr)<br>40-49 (7.9%)<br>50-59 (19.7%)<br>60-69 (29.4%)<br>70-79 (29.3%)<br>=/+ 80 (13.7%)<br>Sex = 51.5% Male                        | Long term follow up -<br>Median follow-up was 7.2 years        |                                                                                       |                                                                                                |                         | UV analysis:<br>Ref: 40-49yr<br><b>HR(95%CI): 50-59 yr 2.20 (1.43, 3.38) &lt;.01</b><br>MV: <b>2.13 (1.38, 3.27) &lt;.01</b><br><br>UV HR (95%CI): 60-69 yr 3.55 (2.35, 5.36) <.01<br>MV: <b>3.50 (2.31, 5.29) &lt;.01</b><br><br>UV HR (95%CI): 70-79 yr 6.37 (4.21, 9.63) <.01<br>MV: <b>6.10 (4.03, 9.22) &lt;.01</b> | Low risk of bias          |



| First author, year                  | Study design                                                          | Participants Age (M, SD unless otherwise specified) and Sex                                                               | Follow up times                                                                  | Incidence of AA at next surv (*indicates AN)                                                                                   | Incidence CRC at next surv                                                                                              | Long term CRC incidence | Long term CRC mortality                                                         | Level of evidence (QUIPS)    |
|-------------------------------------|-----------------------------------------------------------------------|---------------------------------------------------------------------------------------------------------------------------|----------------------------------------------------------------------------------|--------------------------------------------------------------------------------------------------------------------------------|-------------------------------------------------------------------------------------------------------------------------|-------------------------|---------------------------------------------------------------------------------|------------------------------|
|                                     |                                                                       |                                                                                                                           |                                                                                  | Absolute values (where available) and OR/HR/RR                                                                                 |                                                                                                                         |                         |                                                                                 |                              |
|                                     |                                                                       |                                                                                                                           |                                                                                  |                                                                                                                                |                                                                                                                         |                         | UV HR (95%CI): ≥80 yr 16.07 (10.47, 24.66) <.01<br>MV: 14.97 (9.74, 23.01) <.01 |                              |
| Huang 2012                          | Retrospective cohort – data for the sub cohort with baseline adenomas | N = 197<br>Age = 52 +/- 6.4<br>Sex = NR for sub cohort                                                                    | FS- 5 years                                                                      | Reference is 50-60 years. ≥60 years: 16 (27.6%) RR 3.91 (2.48-7.52) p<0.001                                                    |                                                                                                                         |                         |                                                                                 | Low risk of bias             |
| Huang 2012a                         | Retrospective cohort                                                  | N= 1794<br>Age = Mean NR<br><50: 40%<br>50-60: 29%<br>>60 years: 30%<br>Sex = 64% Male                                    | FS combined (had "at least one surveillance"), 2.67 years                        |                                                                                                                                | Interval CRC<br><50: 1(reference) (n2)<br>50-60: (n3) 0.26 (0.05, 1.26) p=0.094<br>≥60: (n9) 1.34 (1.08, 1.92), p=0.030 |                         |                                                                                 | Low risk of bias             |
| Huang 2010                          | Retrospective cohort                                                  | N= 1356<br>Age = 52.4 (±12.5) (range 20– 84 years)<br>Sex = 63.6% male                                                    | FS SS subsequent - data on cumulative recurrence 1 – 20 years.                   | Age vs <50yr (n20/3.6%):<br>50-60yrs (n43/10.9%) HR 1.81 (1.05–3.12) p=0.03<br>>60yrs (n60/14.7%) HR 4.81 (2.80–8.25) p=<0.001 |                                                                                                                         |                         |                                                                                 | Low risk of bias             |
| Jang 2015                           | Retrospective cohort                                                  | N = 434<br>Age = 61.0 +/- 8.6<br>Sex = 77.4% Male                                                                         | FS more than 1 year since index                                                  | n/s p=0.059                                                                                                                    |                                                                                                                         |                         |                                                                                 | Low risk of bias             |
| *Jung 2016                          | Retrospective cohort study                                            | N = 1646<br>Age = HRF =>3: 61.7 (10.4); HRF =<2: 59.3 (9.7) years.<br>Sex = Male HRF =>3: 340 (73.4%); HRF =<2: 876 (74%) | FS: HRF =>3: 4.0 years (range 2.5-11); HRF =<2: 4.1 years (range 2.5-10.9)       | HR (95%CI).<br>*Age 1.02 (1.01-1.03)                                                                                           |                                                                                                                         |                         |                                                                                 | Moderate risk of bias        |
| Laiyamo 2008 (Laiyamo 2011; Laiyamo | Prospective cohort (from thePPT)                                      | N = 1905<br>Age = 61.1 (9.9)<br>Sex = 64.5% Male                                                                          | 4 years (end of trial). (follow up data at 6.2 years after the end of the trial) | Per 1-year increase AA v NAA RR 1.04 (1.02-1.06); AA v No A RR 1.05 (1.03-1.07)                                                |                                                                                                                         |                         |                                                                                 | Low to moderate risk of bias |





| First author, year              | Study design                               | Participants Age (M, SD unless otherwise specified) and Sex | Follow up times                                                                                                                       | Incidence of AA at next surv (*indicates AN)                                                                                                                                                                                                                                                                                                                                                                                                 | Incidence CRC at next surv | Long term CRC incidence | Long term CRC mortality | Level of evidence (QUIPS) |
|---------------------------------|--------------------------------------------|-------------------------------------------------------------|---------------------------------------------------------------------------------------------------------------------------------------|----------------------------------------------------------------------------------------------------------------------------------------------------------------------------------------------------------------------------------------------------------------------------------------------------------------------------------------------------------------------------------------------------------------------------------------------|----------------------------|-------------------------|-------------------------|---------------------------|
|                                 |                                            |                                                             |                                                                                                                                       | <b>Absolute values (where available) and OR/HR/RR</b>                                                                                                                                                                                                                                                                                                                                                                                        |                            |                         |                         |                           |
| 2012; Laiyamo 2013; Leung 2010) |                                            |                                                             |                                                                                                                                       |                                                                                                                                                                                                                                                                                                                                                                                                                                              |                            |                         |                         |                           |
| Lee 2017                        | Retrospective cohort                       | N= 399<br>Age = 56.6±9.3<br>Sex = 69.7% Male                | FS at 3 or 5 years (comparison)                                                                                                       | UV analysis OR (95%CI): Age continuous 1.045 (0.995-1.096) P=0.076<br>MV analysis: 1.062 (1.008-1.118) P=0.024 independent risk factor for AA in MV analysis.                                                                                                                                                                                                                                                                                |                            |                         |                         | Low risk of bias          |
| *Martinez 2009                  | Pooled analysis of 8 retrospective studies | N = 9167<br>Age = Mean 62.0<br>Sex = 71.2% male             | Median follow-up was 47.2 months, range 36.9 to 59.0                                                                                  | MV OR (95%CI)<br>*Age: 50-59 is reference (AA 8.6 (7.5-9.8) CRC 0.3 (0.1-0.6).<br><40 (AA 3.9% (95%CI 0.8-7.0) CRC 0.0)<br>OR 0.41 (0.18-0.94);<br>40-49 (AA 6.3 (4.7-8.0) CRC 0.1 (0.0-0.4))<br>OR 0.67 (0.48-0.93);<br>60-69 (AA 12.2 (11.1-13.2) CRC 0.6 (0.3-0.8))<br>OR 1.39 (1.16-1.68);<br>70-79 (AA 14.5 (13.0-16.0) CRC 1.3 (0.8-1.7))<br>OR 1.72 (1.40-2.11);<br>80+ (AA 17.7 (8.2-27.3) CRC 1.6 (0.0-4.7))<br>OR 2.79 (1.31-5.57) |                            |                         |                         | Low risk of bias          |
| Morelli 2013 (Imperiale, 2014)  | Retrospective cohort                       | N = 965<br>Age = 57.8 (9.8)<br>Sex = 62% Male               | Mean (median) SD interval between index and first surveillance colonoscopies was 33.9 (36.3) 20.2 months; and 44.1 (38.5) 18.6 months | Age (increase of 10 yr) MV OR (95%CI): FS 1.47 (1.16-1.87)                                                                                                                                                                                                                                                                                                                                                                                   |                            |                         |                         |                           |



| First author, year                                                                                                                                                        | Study design               | Participants Age (M, SD unless otherwise specified) and Sex                                                                                                                                                                                                          | Follow up times                                                                                                                            | Incidence of AA at next surv (*indicates AN)                                                                                                                                                    | Incidence CRC at next surv | Long term CRC incidence | Long term CRC mortality | Level of evidence (QUIPS) |
|---------------------------------------------------------------------------------------------------------------------------------------------------------------------------|----------------------------|----------------------------------------------------------------------------------------------------------------------------------------------------------------------------------------------------------------------------------------------------------------------|--------------------------------------------------------------------------------------------------------------------------------------------|-------------------------------------------------------------------------------------------------------------------------------------------------------------------------------------------------|----------------------------|-------------------------|-------------------------|---------------------------|
|                                                                                                                                                                           |                            |                                                                                                                                                                                                                                                                      |                                                                                                                                            | <b>Absolute values (where available) and OR/HR/RR</b>                                                                                                                                           |                            |                         |                         |                           |
|                                                                                                                                                                           |                            |                                                                                                                                                                                                                                                                      | between first and second surveillance.                                                                                                     |                                                                                                                                                                                                 |                            |                         |                         |                           |
| *Park 2016                                                                                                                                                                | Retrospective cohort study | N = 1479 ( high-risk adenoma at index and last surveillance ≥ 2.5 years after index).<br>Age = Group 1, < 50 years (n = 233)<br>Group 2, 50-69 years (n = 1000)<br>Group 3, ≥70 years (n = 246)<br>Sex = Group 1 75.1% Male, Group 2 74.6% Male, Group 3 69.5% Male. | Mean time to the last colonoscopic surveillance was about 4 years. Groups 1, 2, and 3 (4.1 ± 1.4, 4.0 ± 1.4, and 4.0 ± 1.5, respectively). | *HR (95% CI):<br>*Age <50yrs as ref.<br>50-70yrs: 1.61 (0.96-2.71)<br>>=70yrs: 2.56 (1.43-4.59)                                                                                                 |                            |                         |                         | Moderate risk of bias     |
| Solakoglu 2017                                                                                                                                                            | Prospective Cohort         | N = 47<br>Age =55.81 ±10.84<br>Sex = 72.3%                                                                                                                                                                                                                           | 3 years                                                                                                                                    | Age (per 10-year increase) MV OR: 1.984, 95%CI: 0.845, 1.150.                                                                                                                                   |                            |                         |                         | High risk of bias         |
| Tae 2017                                                                                                                                                                  | Retrospective cohort study | N = 2904<br>Age = 57.5 ± 9.0<br>Sex = 71.3% Male                                                                                                                                                                                                                     | FS - Mean follow up period 3 years, patients underwent 1.3 surveillance colonoscopies                                                      | The mean (SD) Age (years), was higher in patients who had recurrent AAs compared to those who did not:<br>UV: 58.4 ± 9.1 v 59.5 ± 8.8<br>p=0.002<br><br>MV: OR (95%CI) 1.02 (1.01-1.04) p=0.027 |                            |                         |                         | Moderate risk of bias.    |
| Van Enckevort 2014                                                                                                                                                        | Retrospective cohort       | N= 433<br>Age = 55 (range 24-82)<br>Sex = 41% Male                                                                                                                                                                                                                   | Median follow-up period was 85 months (range 9-260).                                                                                       | Age (continuous) (HR=1.05; 95% CI 1.03-1.07; p<0.001)                                                                                                                                           |                            |                         |                         | Moderate risk of bias     |
| *Vemulapalli 2014                                                                                                                                                         | Retrospective cohort study | N=1414<br>Age = (split by 5 groups increasing in risk) Grp 1: 56.7 (10.4); Grp 2: 60.6 (9.4); Grp 3: 62.3 (9.4); Grp 4: 61.3 (11.3); Grp 5: 64.7 (10.2).<br>Sex = Male Grp 1: 51.4%; Grp 2: 64.4%; Grp 3: 67.7%; Grp 4: 52.7%; Grp 5: 62.6%.                         | FS >200 days and less than 3 years.                                                                                                        | *UV OR(95% CI) Age (yearly increments): 1.04 (1.01-1.07).                                                                                                                                       |                            |                         |                         | Moderate risk of bias     |
| <b>CQ1.10 Patient: Older age (e.g. &lt;75 vs 75+; there will be other variants of age cut-off and we would like to capture these too) Patient: NOT in Older age range</b> |                            |                                                                                                                                                                                                                                                                      |                                                                                                                                            |                                                                                                                                                                                                 |                            |                         |                         |                           |



| First author, year                                                   | Study design                               | Participants Age (M, SD unless otherwise specified) and Sex                                                                                                                                                                                                                                                                                                   | Follow up times                                                                                                                            | Incidence of AA at next surv (*indicates AN)                                                                                                                                                                                                                   | Incidence CRC at next surv | Long term CRC incidence | Long term CRC mortality | Level of evidence (QUIPS) |
|----------------------------------------------------------------------|--------------------------------------------|---------------------------------------------------------------------------------------------------------------------------------------------------------------------------------------------------------------------------------------------------------------------------------------------------------------------------------------------------------------|--------------------------------------------------------------------------------------------------------------------------------------------|----------------------------------------------------------------------------------------------------------------------------------------------------------------------------------------------------------------------------------------------------------------|----------------------------|-------------------------|-------------------------|---------------------------|
| <b>Absolute values (where available) and OR/HR/RR</b>                |                                            |                                                                                                                                                                                                                                                                                                                                                               |                                                                                                                                            |                                                                                                                                                                                                                                                                |                            |                         |                         |                           |
| All evidence uses a reference of younger age so is included in CQ1.9 |                                            |                                                                                                                                                                                                                                                                                                                                                               |                                                                                                                                            |                                                                                                                                                                                                                                                                |                            |                         |                         |                           |
| <b>CQ1.11 Patient: Smoking (variants: current, ex, never) N/a</b>    |                                            |                                                                                                                                                                                                                                                                                                                                                               |                                                                                                                                            |                                                                                                                                                                                                                                                                |                            |                         |                         |                           |
| *Jung 2016                                                           | Retrospective cohort study                 | N = 1646<br>Age = HRF =>3: 61.7 (10.4); HRF =<2: 59.3 (9.7) years.<br>Sex = Male HRF =>3: 340 (73.4%); HRF =<2: 876 (74%)                                                                                                                                                                                                                                     | FS: HRF =>3: 4.0 years (range 2.5-11); HRF =<2: 4.1 years (range 2.5-10.9)                                                                 | *HR (95%CI)<br>Current or ex smoker<br><b>1.04 (0.78-1.37)</b>                                                                                                                                                                                                 |                            |                         |                         | Moderate risk of bias     |
| Lee 2017                                                             | Retrospective cohort                       | N= 399<br>Age = 56.6±9.3<br>Sex = 69.7% Male                                                                                                                                                                                                                                                                                                                  | FS at 3 or 5 years (comparison)                                                                                                            | UV analysis OR (95%CI):<br>Smoking <b>2.409 (0.928-6.254) P=0.071</b> .<br>MV analysis: <b>2.969 (0.911-9.672) P=0.071</b>                                                                                                                                     |                            |                         |                         | Low risk of bias          |
| *Martinez 2009                                                       | Pooled analysis of 8 retrospective studies | N = 9167<br>Age = Mean 62.0<br>Sex = 71.2% male                                                                                                                                                                                                                                                                                                               | Median follow-up was 47.2 months, range 36.9 to 59.0                                                                                       | MV OR (95%CI)<br>*Smoking Never is reference (AA 11.1% (95%CI 9.9-12.2) CRC 0.5 (0.2-0.8).<br>Former (AA 12.1 (11.1-13.1) CRC 0.9 (0.6-1.2))<br>OR <b>1.08 (0.92-1.27)</b> ;<br>Current (AA 11.8% (10.0-13.5) CRC 0.2 (0.0-0.5))<br>OR <b>1.13 (0.90-1.42)</b> |                            |                         |                         | Low risk of bias          |
| *Park 2016                                                           | Retrospective cohort study                 | N = 1479 patients with high-risk adenoma detected at index colonoscopy who underwent their last colonoscopic surveillance ≥ 2.5 years after index colonoscopy were identified.<br>Age = Group 1, < 50 years (n = 233)<br>Group 2, 50-69 years (n = 1000)<br>Group 3, ≥70 years (n = 246)<br>Sex = Group 1 75.1% Male, Group 2 74.6% Male, Group 3 69.5% Male. | Mean time to the last colonoscopic surveillance was about 4 years. Groups 1, 2, and 3 (4.1 ± 1.4, 4.0 ± 1.4, and 4.0 ± 1.5, respectively). | *HR (95% CI):<br>Current or ex smoker <b>1.07 (0.77-1.47)</b>                                                                                                                                                                                                  |                            |                         |                         | Moderate risk of bias     |



| First author, year                                                                              | Study design                               | Participants Age (M, SD unless otherwise specified) and Sex                                                               | Follow up times                                                                       | Incidence of AA at next surv (*indicates AN)                                                                                                                                                                                                                                     | Incidence CRC at next surv | Long term CRC incidence | Long term CRC mortality | Level of evidence (QUIPS)    |
|-------------------------------------------------------------------------------------------------|--------------------------------------------|---------------------------------------------------------------------------------------------------------------------------|---------------------------------------------------------------------------------------|----------------------------------------------------------------------------------------------------------------------------------------------------------------------------------------------------------------------------------------------------------------------------------|----------------------------|-------------------------|-------------------------|------------------------------|
|                                                                                                 |                                            |                                                                                                                           |                                                                                       | <b>Absolute values (where available) and OR/HR/RR</b>                                                                                                                                                                                                                            |                            |                         |                         |                              |
| Tae 2017                                                                                        | Retrospective cohort                       | N = 2904<br>Age = 57.5 ± 9.0<br>Sex = 71.3% Male                                                                          | FS - Mean follow up period 3 years, patients underwent 1.3 surveillance colonoscopies | Current smoker<br>MV: OR (95% CI) 0.69 (0.45-1.05) p=0.086                                                                                                                                                                                                                       |                            |                         |                         | Moderate risk of bias.       |
| <b>CQ1.12 Patient: High body mass index (e.g. BMI&gt;25)? Patient: NOT High body mass index</b> |                                            |                                                                                                                           |                                                                                       |                                                                                                                                                                                                                                                                                  |                            |                         |                         |                              |
| Jang 2015                                                                                       | Retrospective cohort                       | N = 434<br>Age = 61.0 +/- 8.6<br>Sex = 77.4% Male                                                                         | FS more than 1 year since index                                                       | n/s p=0.183                                                                                                                                                                                                                                                                      |                            |                         |                         | Low risk of bias             |
| *Jung 2016                                                                                      | Retrospective cohort study                 | N = 1646<br>Age = HRF =>3: 61.7 (10.4); HRF =<2: 59.3 (9.7) years.<br>Sex = Male HRF =>3: 340 (73.4%); HRF =<2: 876 (74%) | FS: HRF =>3: 4.0 years (range 2.5-11); HRF =<2: 4.1 years (range 2.5-10.9)            | *HR (95%CI)<br>BMI >25: 0.92 (0.71-1.19)                                                                                                                                                                                                                                         |                            |                         |                         | Moderate risk of bias        |
| Laiyamo 2008 (Laiyamo 2011; Laiyamo 2012; Laiyamo 2013; Leung 2010)                             | Prospective cohort (from thePPT)           | N = 1905 (only data for 1826 patients for weight and height)<br>Age = 61.1 (9.9)<br>Sex = 64.5% Male                      | 4 years (end of trial). (follow up data at 6.2 years after the end of the trial)      | Reference is <25kg/m2. 25-29 kg/m2 AA v NAA RR 0.99 (0.61-1.62), AA v No A RR 1.10 (0.69-1.77); 30-38.8 kg/m2 AA v NAA RR 1.58 (0.95-2.60), AA v No A RR 1.69 (1.04-2.75)<br><br>Obesity was associated with an increased risk of advanced adenoma recurrence RR 1.62, 1.01-2.57 |                            |                         |                         | Low to moderate risk of bias |
| Lee 2017                                                                                        | Retrospective cohort                       | N= 399<br>Age = 56.6±9.3<br>Sex = 69.7% Male                                                                              | FS at 3 or 5 years (comparison)                                                       | UV analysis OR (95%CI): BMI (=/+25) 1.391 (0.475-4.075) P=0.554                                                                                                                                                                                                                  |                            |                         |                         | Low risk of bias             |
| *Martinez 2009                                                                                  | Pooled analysis of 8 retrospective studies | N = 9167<br>Age = Mean 62.0<br>Sex = 71.2% male                                                                           | Median follow-up was 47.2 months, range 36.9 to 59.0                                  | MV OR (95%CI)<br>*BMI <25 is reference (AA 11.7% (95%CI 10.4-13.1) CRC 0.5 (0.2-0.8))<br><br>25-<30 AA 11.6 (10.6-12.7) CRC 0.7 (0.4-1.0) (OR 1.00 (0.84-1.19))                                                                                                                  |                            |                         |                         | Low risk of bias             |



| First author, year                                                                                                        | Study design                             | Participants Age (M, SD unless otherwise specified) and Sex                                                                                                                                                                                                                                                                                                              | Follow up times                                                                                                                                          | Incidence of AA at next surv (*indicates AN)                                                                                       | Incidence CRC at next surv                                                                                                                                                                                                                                                        | Long term CRC incidence                                                                                                                                                                                                                                                              | Long term CRC mortality | Level of evidence (QUIPS) |
|---------------------------------------------------------------------------------------------------------------------------|------------------------------------------|--------------------------------------------------------------------------------------------------------------------------------------------------------------------------------------------------------------------------------------------------------------------------------------------------------------------------------------------------------------------------|----------------------------------------------------------------------------------------------------------------------------------------------------------|------------------------------------------------------------------------------------------------------------------------------------|-----------------------------------------------------------------------------------------------------------------------------------------------------------------------------------------------------------------------------------------------------------------------------------|--------------------------------------------------------------------------------------------------------------------------------------------------------------------------------------------------------------------------------------------------------------------------------------|-------------------------|---------------------------|
|                                                                                                                           |                                          |                                                                                                                                                                                                                                                                                                                                                                          |                                                                                                                                                          | <b>Absolute values (where available) and OR/HR/RR</b>                                                                              |                                                                                                                                                                                                                                                                                   |                                                                                                                                                                                                                                                                                      |                         |                           |
|                                                                                                                           |                                          |                                                                                                                                                                                                                                                                                                                                                                          |                                                                                                                                                          | 30+ (AA 11.6 (10.2-12.9) CRC 0.8 (0.4-1.2)) 1.13 (0.93-1.38)                                                                       |                                                                                                                                                                                                                                                                                   |                                                                                                                                                                                                                                                                                      |                         |                           |
| *Park 2016                                                                                                                | Retrospective cohort study               | N = 1479 patients with high-risk adenoma detected at index colonoscopy who underwent their last colonoscopic surveillance $\geq 2.5$ years after index colonoscopy were identified.<br>Age = Group 1, < 50 years (n = 233)<br>Group 2, 50-69 years (n = 1000)<br>Group 3, $\geq 70$ years (n = 246)<br>Sex = Group 1 75.1% Male, Group 2 74.6% Male, Group 3 69.5% Male. | Mean time to the last colonoscopic surveillance was about 4 years. Groups 1, 2, and 3 (4.1 $\pm$ 1.4, 4.0 $\pm$ 1.4, and 4.0 $\pm$ 1.5, respectively).   | *HR (95% CI):<br>BMI 0.89 (0.62-1.27)                                                                                              |                                                                                                                                                                                                                                                                                   |                                                                                                                                                                                                                                                                                      |                         | Moderate risk of bias     |
| Tae 2017                                                                                                                  | Retrospective cohort study               | N = 2904<br>Age = 57.5 $\pm$ 9.0<br>Sex = 71.3% Male                                                                                                                                                                                                                                                                                                                     | FS - Mean follow up period 3 years, patients underwent 1.3 surveillance colonoscopies                                                                    | BMI MV: OR (95%CI) < 25 vs 25-29: 0.89 (0.64-1.23) p=0.481<br>Vs $\geq 30$ : 1.04 (0.46-2.35) p=0.935                              |                                                                                                                                                                                                                                                                                   |                                                                                                                                                                                                                                                                                      |                         | Moderate risk of bias.    |
| <b>CQ1.13 Index colonoscopy Bowel prep quality (variants: good, adequate, inadequate/poor) Inadequate/poor bowel prep</b> |                                          |                                                                                                                                                                                                                                                                                                                                                                          |                                                                                                                                                          |                                                                                                                                    |                                                                                                                                                                                                                                                                                   |                                                                                                                                                                                                                                                                                      |                         |                           |
| Atkin 2017                                                                                                                | Retrospective, multicentre, cohort study | N = 11 944 patients with data available for analysis; 4608 attended one or more surveillance visits and 7336 patients did not attend surveillance. Age = Median age 66.7 years (IQR 58.4-74.0) <55yrs 2122 (18%); 55-64yrs 3179 (27%); 65-74yrs 3957 (33%); 75+ys 2686 (22%)<br>Sex = 55.47 Male                                                                         | FS or more (All surveillance intervals, 0, 1, 2 3+, plus comparisons of no surveillance v surveillance) Median follow up time 7.9 years, (IQR 5.6-11.1), | UV Ref Excellent/good OR (95%)(n=4608)<br>Satisfactory 1.19 (0.89 - 1.59)<br>Poor 1.54 (1.04 - 2.28)<br>Unknown 1.39 (1.16 - 1.68) | UV Ref Excellent/good OR (95%)(n=4608)<br>Satisfactory 0.66 (0.27 - 1.61)<br>Poor 2.87 (1.36 - 6.06)<br>Unknown 0.89 (0.55 - 1.46)<br><br>MV FS: Model 1 interval as categorical<br>Best bowel preparation, Excellent/good/satisfactory/unknown (ref)<br>Poor 3.80 (1.79 to 8.05) | UV HR (95% CI): (n=11944) (vs Excellent or good) Satisfactory 1.41 (0.90-2.22); Poor 2.32 (1.33-4.06); Unknown 1.37 (0.99-1.91) p=0.0299<br>Multivariate HR (95% CI): (vs Excellent or good) Satisfactory 1.51 (0.95-2.39); Poor 2.09 (1.19-3.67); Unknown 1.39 (1.00-1.94) p=0.0452 |                         | Low risk of bias          |



| First author, year                                                        | Study design               | Participants Age (M, SD unless otherwise specified) and Sex                                                                                                       | Follow up times                                                                  | Incidence of AA at next surv (*indicates AN)                                                                                                                                                                                                                                                                                       | Incidence CRC at next surv                                                                                                             | Long term CRC incidence                            | Long term CRC mortality | Level of evidence (QUIPS) |
|---------------------------------------------------------------------------|----------------------------|-------------------------------------------------------------------------------------------------------------------------------------------------------------------|----------------------------------------------------------------------------------|------------------------------------------------------------------------------------------------------------------------------------------------------------------------------------------------------------------------------------------------------------------------------------------------------------------------------------|----------------------------------------------------------------------------------------------------------------------------------------|----------------------------------------------------|-------------------------|---------------------------|
|                                                                           |                            |                                                                                                                                                                   |                                                                                  | <b>Absolute values (where available) and OR/HR/RR</b>                                                                                                                                                                                                                                                                              |                                                                                                                                        |                                                    |                         |                           |
|                                                                           |                            |                                                                                                                                                                   |                                                                                  |                                                                                                                                                                                                                                                                                                                                    | MV FS: Model 2 interval as continuous<br>Best bowel preparation, Excellent/good/satisfactory/unknown (ref)<br>Poor 3.30 (1.54 to 7.07) |                                                    |                         |                           |
| *Cubiella 2016                                                            | Retrospective cohort study | N = 5401 (2022 HR group; 3379 IR group)<br>Age = 60-69yr; HR 842 (60%); IR 1241 (58.2%); 50-59yrs; HR 562 (40%) IR 891 (41.8%).<br>Sex = Male HR 74.9%; IR 67.4%. | Mean follow up 2.8 years (SD 1 yr) for 65% of study population                   | *Bowel prep%: Inadequate 21.4 (-0.1-42.9) Adequate 13.7 (12.6-14.9) <b>OR 0.6 (0.2-2.4)</b>                                                                                                                                                                                                                                        |                                                                                                                                        |                                                    |                         | High risk of bias         |
| Facciorusso 2016a & b [sub sample]                                        | Retrospective cohort       | n = 746<br>Age: Median 58 (Range 36-81)<br>Sex: 62.7% Male                                                                                                        | FS at 3 years.                                                                   | UV Split by local recurrence of ACAs and metachronous distant polyp occurrence (reference poor): All ns<br><b>Local: Excellent 0.96 (0.75-1.32)</b><br><b>Good 0.92 (0.81-1.13)</b><br><b>Fair 1.03 (0.76-1.25)</b><br><b>Met dist: Excellent 0.71 (0.55-0.92)</b><br><b>Good 0.88 (0.73-1.04)</b><br><b>Fair 0.93 (0.81-1.11)</b> |                                                                                                                                        |                                                    |                         | Low risk of bias          |
| Jang 2015                                                                 | Retrospective cohort       | N = 434<br>Age = 61.0 +/- 8.6<br>Sex = 77.4% Male                                                                                                                 | FS more than 1 year since index                                                  | <b>Bowel preparation good or fair v poor OR 2.208 (1.238-4.662)</b>                                                                                                                                                                                                                                                                |                                                                                                                                        |                                                    |                         | Low risk of bias          |
| *Van Heijningen 2013                                                      | Retrospective cohort study | N=2990<br>Age = 61.3<br>Sex = 1647 (55%) Male.                                                                                                                    | FS Median 24 months (IQR 12-40m)<br>Mean number of surveillances 1.7 (range 1-5) | *MV OR (95%CI)<br>Bowel prep (ref good) (AA 152 (5.6%); CRC 31 (1.1%))<br>Moderate (AA 5 (2.2%); CRC 6 (2.6%)) OR <b>0.8 (0.4-1.5)</b><br>Insufficient (AA 8 (17.7%); CRC 1 (2.2%)) OR <b>3.4 (1.6-7.4)</b>                                                                                                                        |                                                                                                                                        |                                                    |                         | Moderate risk of bias     |
| <b>CQ1.14 Index colonoscopy complete to caecum incomplete colonoscopy</b> |                            |                                                                                                                                                                   |                                                                                  |                                                                                                                                                                                                                                                                                                                                    |                                                                                                                                        |                                                    |                         |                           |
| Atkin 2017                                                                | Retrospective,             | N = <b>11 944</b> patients with data available for analysis; <b>4608</b> attended one or more surveillance                                                        | FS or more (All surveillance intervals, 0, 1, 2 3+)                              | UV Ref Complete OR (95%)(n=4608)<br><b>Unknown 1.78 (1.49 - 3.13)</b>                                                                                                                                                                                                                                                              | UV Ref Complete OR (95%)(n=4608)                                                                                                       | UV HR (95% CI): (n=11944) (vs Complete) Incomplete |                         | Low risk of bias.         |



| First author, year                                                                                                                                     | Study design               | Participants Age (M, SD unless otherwise specified) and Sex                                                                                                                                      | Follow up times                                                                                      | Incidence of AA at next surv (*indicates AN)                                                                                                                                                                                                                                                           | Incidence CRC at next surv                                  | Long term CRC incidence                                                                                                                | Long term CRC mortality | Level of evidence (QUIPS) |
|--------------------------------------------------------------------------------------------------------------------------------------------------------|----------------------------|--------------------------------------------------------------------------------------------------------------------------------------------------------------------------------------------------|------------------------------------------------------------------------------------------------------|--------------------------------------------------------------------------------------------------------------------------------------------------------------------------------------------------------------------------------------------------------------------------------------------------------|-------------------------------------------------------------|----------------------------------------------------------------------------------------------------------------------------------------|-------------------------|---------------------------|
|                                                                                                                                                        |                            |                                                                                                                                                                                                  |                                                                                                      | <b>Absolute values (where available) and OR/HR/RR</b>                                                                                                                                                                                                                                                  |                                                             |                                                                                                                                        |                         |                           |
|                                                                                                                                                        | multicentre, cohort study  | visits and 7336 patients did not attend surveillance. Age = Median age 66.7 years (IQR 58.4–74.0) <55yrs 2122 (18%); 55-64yrs 3179 (27%); 65-74yrs 3957 (33%); 75+ys 2686 (22%) Sex = 55.47 Male | plus comparisons of no surveillance v surveillance) Median follow up time 7-9 years, (IQR 5-6-11.1), | Incomplete 1.57 (1.22 - 2.02)<br><br>MV FS: Model 1 interval as categorical<br>Most complete colonoscopy, Complete (ref)<br>Incomplete/unknown 1.92 (1.58 to 2.33)<br><br>MV FS: Model 2 interval as continuous<br>Most complete colonoscopy, Complete (ref)<br>Incomplete/unknown 1.92 (1.58 to 2.33) | Unknown 1.00 (0.56-1.79)<br><br>Incomplete 4.28 (2.61-7.03) | or not known 1.64 (1.24-2.16) p= 0.0007<br>Multivariate HR (95% CI):(vsComplete)<br>Incomplete or not known 1.80 (1.34-2.41) p= 0.0001 |                         |                           |
| *Cubiella 2016                                                                                                                                         | Retrospective cohort study | N = 5401 (2022 HR group; 3379 IR group)<br>Age = 60-69yr; HR 842 (60%); IR 1241 (58.2%); 50-59yrs; HR 562 (40%) IR 891 (41.8%).<br>Sex = Male HR 74.9%; IR 67.4%.                                | Mean follow up 2.8 years (SD 1 yr) for 65% of study population                                       | *Complete to caecum%: No 11.5 (-0.7-23.8); Yes 13.8 (12.6-14.9). OR 1.1 (0.3-3.7)                                                                                                                                                                                                                      |                                                             |                                                                                                                                        |                         | High risk of bias         |
| *Van Heijninge n 2013                                                                                                                                  | Retrospective cohort study | N=2990<br>Age = 61.3<br>Sex = 1647 (55%) Male.                                                                                                                                                   | FS Median 24 months (IQR 12-40m)<br>Mean number of surveillances 1.7 (range 1-5)                     | *MV OR (95%CI)<br>Complete (yes ref) (AA 156 (5.6%); CRC 35 (1.2%)<br>Proximal (AA 5 (2.8%); CRC 2 (1.1%) OR 0.6 (0.3-1.3)<br>Distal (AA 4 (12%); CRC 1 (3%) OR 3.2 (1.2-8.5)                                                                                                                          |                                                             |                                                                                                                                        |                         | Moderate risk of bias     |
| <b>CQ1.15 Index colonoscopy by high-quality colonoscopist NOT high quality colonoscopist</b>                                                           |                            |                                                                                                                                                                                                  |                                                                                                      |                                                                                                                                                                                                                                                                                                        |                                                             |                                                                                                                                        |                         |                           |
| Jang 2015                                                                                                                                              | Retrospective cohort       | N = 434<br>Age = 61.0 +/- 8.6<br>Sex = 77.4% Male                                                                                                                                                | FS more than 1 year since index                                                                      | Endoscopist n/s p=0.135                                                                                                                                                                                                                                                                                |                                                             |                                                                                                                                        |                         | Low risk of bias          |
| <b>CQ1.16 Index colonoscopy using high-adenoma-detecting technologies (variants: HD scope, chromoendoscopy) no high-adenoma-detecting technologies</b> |                            |                                                                                                                                                                                                  |                                                                                                      |                                                                                                                                                                                                                                                                                                        |                                                             |                                                                                                                                        |                         |                           |
| No evidence identified.                                                                                                                                |                            |                                                                                                                                                                                                  |                                                                                                      |                                                                                                                                                                                                                                                                                                        |                                                             |                                                                                                                                        |                         |                           |

UV Univariate; MV Multivariate (adjusted); OR Odds ratio; HR Hazard ratio; RR Risk Ratio; SIR standardised incidence ratio; AA Advanced Adenoma; CRC colorectal cancer; \*Advanced Neoplasia (AN) a composite measure of AA and CRC. Green highlight indicates statistically significant positive associations. Red highlight indicates non significant findings. Pink highlight indicates statistically significant negative associations. Absolute values reported where available in the paper.

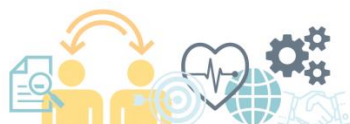

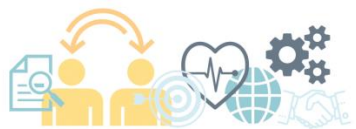



## Synthesis of evidence for CQ1

### CQ1.1

Thirteen studies reported evidence relating to risks at first surveillance associated with the presence of high grade dysplasia at index colonoscopy. There was fairly consistent evidence, with generally low to moderate risk of bias, for the risk of advanced adenoma (AA) with five studies (Atkin 2017; Facciorusso 2016; Van Enckevort 2014; Fairley 2014; Huang 2010) reporting statistically significantly increased odds of AA at first surveillance if HDG was present at index. Atkin (2017) reported an incidence of AA of 19.06% (OR 1.44 95%CI 1.18 - 1.75), and Huang (2010) reported an incidence of 27.7% (HR 1.61 95%CI 1.07–2.42). Odds ratios only were reported by Facciorusso (2016) and Fairley (2014), respectively, as 4.25 (95%CI 2.11-7.5) and 4.3 (95%CI 2.2 - 8.4), and Van Enckevort reported a hazard ratio of 1.73 (95% CI 1.13-2.64; p=0.012). Five studies (Park 2016; Lee 2013; Martinez 2009; Cubiella 2016; Van Heijningen 2013) only reported statistical analyses on advanced neoplasia (AN) with four reporting no significant association between HDG at index and risk of AN at first surveillance, and the fifth study (Cubiella 2016) reporting an OR 0.7 (95%CI 0.5-0.98), showing significantly reduced risk associated with HDG. Again risk of bias was generally rated as moderate to low. Across these studies, where reported, incidence ranged from 12.1% (Cubiella 2016) for AN up to 16% for AA and CRC 1.3% (Martinez 2009). The risk of CRC at next surveillance was reported on in three studies all rated as having a low risk of bias (Atkin 2017; Fairley 2014; Huang 2012) and demonstrated consistent statistically significant associations between HDG at index and CRC incidence, although as the number of events was very small. One of these studies reported on the incidence of CRC as 3.06% (n26) (OR 2.09 95%CI 1.29 - 3.37) (Atkin, 2017; Huang 2012) respectively. The two other studies reported an odds ratio of 13.2 (95%CI 2.8 - 62.1) for incidence of CRC (Fairley 2014), and an odds ratio of 1.61 (95%CI 1.07 - 2.42) for interval CRC (Huang 2012). Only one study reported evidence for long term CRC incidence (Atkin 2017) demonstrating a significant association with HDG at index (OR 1.85 95%CI 1.34–2.55). Although this study was large scale and was rated as having a low risk of bias the number of events were very small. No studies reported evidence for CRC mortality. GRADE of recommendation MODERATE.

### CQ1.2

Sixteen studies reported evidence relating to risks at first surveillance associated with the presence tubulovillous or villous histology at index colonoscopy. Overall the evidence suggests that risk for AA at first surveillance was increased if tubulovillous or villous components (rather than tubular) were identified at index with consistent statistically significant associations reported across four studies (Atkin 2017; Huang 2010; Fairley 2014; Laiyamo 2008) rated as low to moderate risk of bias, and in one study (Nusko 2008) rated as having a high risk of bias. Incidence of AA when tubulovillous components identified at index was 17.51% (OR 1.93 95%CI 1.59 to 2.34) and 25.05% (OR 3.03 (2.33 to 3.95) when villous components were identified (Atkin 2017). The incidence for AA when villous components were reported at index was reported as 21.2% in Nusko (2008). Incidence for tubulovillous and villous histology combined was reported



as 26.1% (HR 2.57; 95%CI 1.24–5.32) in Huang (2010), and Fairley (2014) reported an odds ratio for villous histology of 3.7 (95%CI 2.9, 4.7). Laiyamo (2008) presented data on risk ratios comparing AA with no AA at first surveillance and AA with no adenoma at first surveillance, reporting statistically significant risk ratios of 2.38 (95%CI 1.56-3.64) and 2.25 (95%CI 1.49-3.39), respectively. A further study, Laish (2017), reported no significant association when the index tubulovillous adenoma was small (OR 0.63 (0.36-1.12)), but the association was statistically significant when it was large (OR 2.11 95%CI 1.40-3.19). Two further studies (Facciorusso 2016; Solakoglu 2017) did not report statistically significant associations. When the outcome measure was AN (advanced neoplasia) the findings were similar to those reported for AA with five studies rated as low to moderate risk of bias (Park 2016; Lee 2013; Martinez 2009; Cubiella 2016; Van Heijningen 2013) reporting evidence. Four of the five studies reported significant associations, showing increased risk for AN at first surveillance if tubulovillous or villous components (rather than tubular) were identified at index. Incidence of AN when villous components were identified at index was reported as 15.5% (OR 1.4 95%CI 1.1-1.7) (Cubiella 2016), 11.9% (Lee 2013), and Van Heijningen (2013) reported an odds ratio of 2.0 (95%CI 1.2-3.2) with incidence of AA 13% and for CRC 3.8%. Where findings were reported for tubulovillous and villous components combined Martinez (2009) reported an odds ratio of 1.28 (95%CI 1.07-1.52) with incidence of AA as 16.8%, and CRC as 0.9%. In the final study (Park 2016) although the hazard ratio (HR 1.29 95%CI 0.92–1.81), indicated **increased risk**, it was not statistically significant. It should be noted that a number of studies did not include data relating to the number of events. The risk for CRC at first surveillance was reported on in five studies rated as low risk of bias (Atkin 2017; Huang 2012a; Coleman 2015; Fairley 2014; Laish 2017) with all five reporting statistically significant findings, showing that risk for CRC was increased at first surveillance if tubulovillous or villous histology (rather than tubular) was present at index. Atkin (2017) reported an incidence of CRC of 1.83% (OR 1.76 95%CI 1.00 to 3.09) if tubulovillous components were identified at index and 4.14% (OR 4.09 95%CI 2.13 to 7.86) if villous components were identified. Fairley (2014) reported a statistically significant odds ratio of 7.4 (95%CI 2.5 - 21.5) for the risk of CRC if villous components were present at index. The incidence of CRC was reported as 2.9% (HR 1.51 (1.02-2.23) (Coleman, 2015) and the odds for interval CRC was 1.38 (1.03-1.85) (Huang 2012a) if tubulovillous or villous components were present at index. Laish (2017) reported the incidence of CRC at first surveillance if small tubulovillous adenomas (TVA) were present at index as 1.5%, and as 1.3% large TVA. One study, rated as having a low risk of bias, presented evidence on long term CRC incidence (Atkin 2017) showing, **in univariate analyses, a statistically significant increased risk for long term CRC (vs tubular) if tubulovillous components were present at index (HR 1.36 95%CI 1.00–1.87) and if villous components were present (HR 1.65 95%CI 1.03–2.64)**. There was no statistically significant increased risk for long term CRC if tubulovillous or villous histology was present at index in multivariate analyses, **although it should be noted that not all studies presented multivariate analyses, therefore confounding factors may be present in these analyses**. One other study on long term CRC mortality (HR 1.30 95%CI 1.13-1.50) (Emilsson 2017; Loberg 2014) with reported tubulovillous or villous histology as a statistically significant risk factor for CRC. There is fairly



consistent moderate to high quality evidence suggesting that tubulovillous or villous histology at index is associated with an increased risk for AA or AN and CRC at the next surveillance. Findings were reported across a number of studies although there is some uncertainty due to the lack of absolute values available in some studies, the evidence was, however, consistent with a number of large studies rated as having a low risk of bias. Evidence for long term CRC incidence and mortality was limited being presented in only one study for each outcome, however each was a large scale study rated as either low or moderate risk of bias. GRADE of recommendation: MODERATE

### CQ1.3

Fifteen studies reported evidence relating to polyp size, and were rated as having a moderate to low risk of bias. Risk for AA at first surveillance was increased if the size of the adenoma at index was equal to or greater than 20mm, this association was statistically significant in three studies (Atkin 2017; Facciorusso 2016a&b; Huang 2010), reporting incidence of AA ranging from 21.35% (Atkin 2017) to 81.1% (Huang 2010). In one study, reporting the outcome AN in statistical analyses, (Martinez 2009) the incidence of AA was 19.3% and 1.2% for CRC. One study reporting the outcome AA (Fairley 2014) and three studies reporting the outcome AN (Park 2016; Martinez 2009; Van Heijningen 2013) demonstrated significant associations if the size of the adenoma was between 10mm and 20mm at index, with incidence rates of 15.9% for AA, and 0.8% for CRC (Martinez 2009), and in a second study 7.5% for AA and 1.7% for CRC (Van Heijningen 2013). One study reported an odds ratio of 3.6 (95%CI 2.8-4.5) (Fairley 2014) and one study reported a hazard ratio of 1.81 (1.28-2.55) (Park 2016). No other associations relating to adenomas at smaller sizes were statistically significant for the outcome AA or AN. Two studies (Atkin 2017; and Fairley 2014), both rated as having a low risk of bias reported on the outcome CRC incidence at next surveillance, and one study on interval CRC (Huang 2012a). Risk for CRC at first surveillance was statistically significantly associated with size of the adenoma at index equal to or greater than 20mm in one large study with a low risk of bias, with incidence of AA reported as 2.2% (Atkin 2017), and with size of adenoma at index equal to or greater than 10mm in a second study the odds ratio was reported as 5.2 (95%CI 1.8-15.1)(Fairley 2014). There was no statistically significant association reported for interval CRC (Huang 2012) when size of adenoma at index was equal to or greater than 10mm, although uncertainty is expected as there were a small number of patients with the prognostic factor at index and the point estimate suggests there may be some increased risk. Only one study rated as low risk of bias presented evidence for the outcome long term CRC incidence (Atkin 2017). Consistent with findings for other outcomes, statistically significant associations were reported for adenomas 10-19mm in size with incidence reported as 2.1% and for those equal to or greater than 20mm in size with incidence reported as 1.7%. There was no evidence reported for the outcome long term CRC mortality. GRADE of recommendation: MODERATE.

### CQ1.4

Twenty one studies presented evidence on risk associated with number of adenomas at index. The evidence was not **consistently statistically significant**



across the included studies and the quality of the studies ranged from low to high risk of bias. Having two adenomas (compared to one) at index was reported to be a statistically significant risk factor for AA at next surveillance in two studies with the incidence of AA reported as 18.33% (Atkin 2017) and 6.1% (Huang 2010). When assessing the evidence relating to any number more than one (e.g two or more) adenomas at index the evidence was mixed, probably due to the small numbers of patients with these risk factors at baseline. Compared to 1 or 2 adenomas there was a statistically significant increased risk for AA reported in three studies (Huang 2010; Huang 2012; Fairley 2014) with incidence of AA if 3 or more adenomas were present at index, reported as 23% (Huang 2010) and 33.3% (Huang 2012) and Fairley reported a significant odds ratio of 2.4 (95%CI 1.9-3.0). Facciorusso (2016) reported significantly increased risk for AA if patients had more than one advanced colorectal adenoma at index (OR 3.22 95%CI 2.19-5.39), Laish (2017) reported (compared to 1 or 2 non advanced adenomas) statistically significantly increased risk for AA at first surveillance if three or more non advanced adenomas were present at index (OR 2.32 95%CI 1.63-3.54) and also if three or if multiple AAs were present at index (OR 3.11 95%CI 1.90-5.09). Further, Jang (2015) reported the odds of AA at first surveillance to be statistically significantly increased as number of adenomas at baseline increased. Atkin (2017) reported no significant association when comparing one adenoma to three or four adenomas, and three studies reported no significant associations for any comparisons (Lee 2017; Laiyamo 2008; Solakoglu 2017). Six studies, rated as having low to moderate risk of bias, reported evidence for the outcome AN. Four studies presented findings showing significantly increased risks for AN with increasing numbers of adenomas at index (Martinez 2009; Cubiella 2016; Vemulapalli 2014; Van Heijningen 2013). With one adenoma as reference, both Martinez (2009) and Van Heijningen (2013) reported statistically increased risk for AN if two, three, and five or more adenomas were present at index, Martinez also reported significantly increased risk for four adenomas at index, although this comparison was not statistically significant in the analyses reported in Van Heijningen (2013). Incidence rates for AA reported across these two studies ranged from 12.7% for two adenomas to 24.1% for five or more adenomas. With less than three adenomas as reference, Cubiella (2016), reported statistically increased risk for AN with incidence of AA when three or four adenomas were present at index as 14.8%, and when five to nine adenomas as 18.4%. Vemulapalli (2014) reported odds ratios for risk for AN at first surveillance, with 1-2 adenomas smaller than 10mm as reference. Findings showed that there was no significantly increased risk if 3 or 4 adenomas less than 10mm were present at index, but there was statistically significant increased risk for AN if five or more adenomas less than 10mm (OR 3.1 95%CI 1.2-8.2), three or four with one 10mm or more (OR 5.6 95%CI 2.1-15.1), and five or more with one 10mm or more (OR 10.8 95%CI 4.5-25.7) at index. Two studies did not find any significantly increased risk for AN associated with number of adenomas present at index (Lee 2013; Jung 2016). Six studies rated as having low to moderate risk of bias (Atkin 2017; Huang 2012a; Cottett 2012; Coleman 2015; Fairley 2014; Laish 2017) reported evidence for the outcome CRC at next surveillance, with two reporting statistically significantly increased risks for CRC at next surveillance with increased numbers of adenomas at index. Cottet (2012) reported significantly increased risks for CRC



at first surveillance if one advanced adenoma (SIR 2.32 95%CI 1.62-3.21) and two or more advanced adenomas (SIR 2.07 95%CI 1.21 to 3.32) were present at index. Whereas if the index adenomas were non advanced there was no increased risk of CRC for either one or two or more adenomas. Fairley (2014) reported a statistically significant increased risk for CRC when three or more adenomas (compared to one or two) were present at index (OR 4.3 95%CI 1.4-12.9). Laish (2017) reported incidence rates without statistical analyses for CRC of 1.1% when 1-2 non advanced adenomas (NAA) were present at index, 2.7% when 3 or more NAAs were present at index, and 3.7% when multiple advanced adenomas were present at index. Three studies reported no statistically significant increased risk for CRC incidence (Atkin 2017; Coleman 2015) and interval CRC (Huang 2012a), with increasing numbers of adenomas. Although, it should be noted that the number of events, particularly in the CRC analyses are very small therefore the findings are very uncertain. One study rated as having a low risk of bias (Atkin 2017) reported evidence on long term CRC incidence and did not demonstrate a statistically significant association. Again, uncertainty is expected where there are a small number of patients with the prognostic factor at index. One further large scale study (Emilsson 2017) presented evidence on CRC mortality reporting statistically significantly increased risk if more than one adenoma was present at index (HR 1.30 95%CI 1.10-1.55). GRADE of recommendation: LOW to MODERATE

#### CQ1.5

Twelve studies, rated as having low to high risk of bias, presented evidence on the risk associated with the presence of proximal adenoma at index. Across the 12 studies the findings **did not consistently report statistically significant increased risk for proximal adenomas at index**. Seven studies presented evidence relating to the risk of AA at first surveillance (Atkin 2017; Huang 2012; Huang 2010; Lee 2017; Jang 2015; Laiyamo 2008; Solakoglu 2017) with only one (Laiyamo 2008) reporting statistically significant associations between proximal adenomas at baseline and risk for AA at first surveillance, when compared to both non advanced adenoma or no adenoma (AA vs Non AA at first surveillance: RR 1.58 95%CI 1.11-2.25; AA vs no adenoma at first surveillance: RR 1.84 95%CI 1.31-2.59). Of those who had a proximal adenoma at baseline 9% had an AA at first surveillance, whereas 5% of those with a distal adenoma at baseline had an AA at first surveillance. Three studies presented data on the outcome AN (Lee 2013; Martinez, 2009; Van Heijningen 2013) with all three reporting statistically significant associations between proximal adenomas at baseline and risk for AN at first surveillance, incidence of AN in those with a proximal adenoma at baseline ranged from 7.7% for AN (Lee, 2013) to 11.8% for AA, and 0.8% for CRC (Martinez 2009). There was no evidence for a statistically significant association for CRC incidence at next surveillance (Atkin 2017; Cottet 2012), although one study (Atkin 2017) did present a statistically significant association between proximal adenoma at index and the risk for long term CRC (HR 1.76 95%CI 1.30-2.38) with a 2% incidence rate. One further large scale study (Emilsson 2017) presented evidence on CRC mortality reporting no association between proximal adenomas at index and long CRC mortality. GRADE of recommendation: LOW

#### CQ1.6



Four studies (Facciourusso 2016; Huang 2012; Huang 2010; Cubiella 2016) presented evidence on the risk associated with adenoma morphology at index, three of these studies were rated as having a low risk of bias, whilst the fourth was rated as having a high risk of bias (Cubiella 2016). Three studies presented evidence on the risks for AA (Facciourusso 2016; Huang 2012; Huang 2010) and only one reported a statistically significant association (Facciourusso 2016) demonstrating an increased risk of AA in patients with sessile (OR 1.96 95%CI 1.12-2.43) or nonpolypoid adenomas (OR 2.43 95%CI 1.14-3.26) at index, relative to those with pedunculated adenomas at index. For the two remaining studies, although **increased risk** was reported it was not statistically significant. One final study presented evidence relating to the outcome AN (Cubiella 2016) showing no statistically significant increased risk relating to adenoma morphology at index. No evidence relating to CRC at the next surveillance, long term CRC incidence, or long term CRC mortality was identified. GRADE of recommendation: VERY LOW

#### CQ1.7

Twenty studies, of generally low risk of bias, presented evidence on the risk associated with male sex. Eleven studies presented evidence relating to AA (Atkin 2017; Facciourusso 2016; Lee 2017; Huang 2010; Huang 2012; Tae 2017; Jang 2015; Laiyamo 2008; Pinsky 2009; Solakoglu 2017; Imperiale 2014). Of these, four studies presented evidence showing a statistically significant increased risk of AA at first surveillance if the patient was male (Huang 2019, Huang 2012, Tae 2017 and Jang 2015), with incidence rates where reported ranging from 12.2% (Huang 2010) to 17.6% (Huang 2012). Five studies presented evidence on the outcome AN (Park 2016; Martinez 2009; Cubiella 2016; Jung 2016; Vemulapalli 2014) with one study (Martinez 2009) reporting a statistically significant increased risk of AN at first surveillance in males (OR 1.40 95%CI 1.19-1.69), with incidence rates of 11.7% for AA and 0.8% for CRC. Four studies presented evidence on CRC incidence at next surveillance with only one study (Coleman 2015) reporting male sex as a statistically significant risk factor (HR 1.69 95%CI 1.26-2.27) with an incidence of 3.2%. However, it should be noted some studies reported a reduction in risk for AA and CRC incidence at next surveillance in females, although at a level that was not statistically significant (Atkin 2017 Huang 2012a). One study reported an association for the risk of long term CRC (Atkin 2017) and a further study for the risk of long term CRC mortality (Emilsson 2017), however, neither were statistically significant. GRADE of recommendation: VERY LOW.

#### CQ1.8

Seven studies, rated as moderate to low risk of bias, (Cottet 2012; Jang 2015; Jung 2016; Laiyamo 2008; Martinez 2009; Park 2016; Tae 2017) reported evidence on the risks associated with a family history of CRC. Two studies reported on the outcome AA (Tae 2017; Jang 2015), and three on the outcome AN (Park 2016; Martinez 2009; Jung 2016). There was no statistically significant increased risk of either AA or AN at first surveillance for patients with a family history of CRC. One study reported on incidence of CRC at first surveillance (Cottet 2012) and again there was no evidence for increased risk associated with a family history of CRC. Cottett (2012) presented evidence separately for those



with AA at index, and for those with non AA at index. In those with an AA at index both those with a family history (SIR 3.76 95%CI 1.51-7.75) and those without (SIR 2.10 95%CI 1.54 – 2.81) were at statistically significantly increased risk for CRC at first surveillance. A formal statistical test for difference between those with or without family history was not performed. Whereas in the non AA group neither those with or without a family history of CRC were at increased risk of CRC, although as for the analysis above a formal statistical test for difference between those with or without family history was not performed. Only one study reported on the long term incidence of CRC (Laiyamo 2008) reporting that of new CRC cases diagnosed during follow up 44% (4/9) had a family history of CRC, however no statistical analyses were presented. No evidence on long term CRC mortality was identified. GRADE of recommendation: MODERATE

#### CQ1.9

Nineteen studies, generally rated as low risk of bias (Atkin 2017; Huang 2012; Huang 2012a; Huang 2010; Cottet 2012; Lee 2017; Van Enkevort 2014; Emilsson 2017; Tae 2017; Coleman 2015; Jang 2015; Laiyamo 2008; Solakoglu 2017; Imperiale, 2014; Park 2016; Martinez 2009; Cubiella 2016 Jung 2016; Vemulapalli 2014) presented evidence on the risks associated with increasing age, and demonstrated that there is relatively consistent evidence suggesting increasing age as a risk factor. Ten studies (Atkin 2017; Huang 2012; Huang 2010; Lee 2017; Van Enkevort 2014; Tae 2017; Jang (2015); Laiyamo 2008; Solakoglu 2017; Imperiale, 2014) reported on AA. Studies used a younger age group as the reference (e.g <55yrs; 50-60years) and reported risks for a range of different older age groups, or presented the findings as the risk associated with increasing age (e.g 1 or 10 year increase/continuous). Two studies reported increased risk for AA at first surveillance associated with older age but this was not statistically significant (Solakoglu 2017; Jang 2015). Although in one of these studies this finding was close to significance (Jang, 2015) and may have become statistically significant if age was categorised. Of the remaining eight studies, Atkin (2017), Huang (2012) and Huang (2010) presented evidence for different age groups compared to a younger age group, showing that compared to the younger age group risk for AA at first surveillance was statistically significantly increased for those aged from 55 years to those over 80 years with incidence, with the exception of the age group 65-69 in one study (Atkin 2017) who did not have a statistically significant increased risk for AA relative to the younger group with an incidence of AA of 14.51%, although this still shows the same overall trend. The incidence of AA at first surveillance across the two studies ranged from 10.9% for the 50-60 year age group (Huang, 2010) to 22.75% in the 80 years or older age group (Atkin, 2017), although it should be noted that the trend was not linear, with Huang (2012) reporting an incidence of 27.6% for an older than 60 years age group. Five further studies presented evidence showing statistically significant increased risk for AA at first surveillance with increasing age presented as a continuous variable (Lee 2017; Enkevort 2014; Tae 2017; Laiyamo 2008; Imperiale, 2014) with odds ratios ranging from 1.02 (95%CI 1.01-1.04) (Tae 2017) to 1.47 (95%CI 1.16-1.87) (Imperiale 2014). Five studies reported on AN (Park 2016; Martinez 2009; Cubiella 2016 Jung 2016; Vemulapalli 2014) with findings more mixed. Three studies presented evidence



per age group relative to the younger age group. Martinez (2009) reported statistically significant increased risks for AN across three age groups (60-69; 70-79; 80+) compared to the younger age group (50-59) with incidence of AA at first surveillance as 12.2%, 14.5%, and 17.7% respectively. Furthermore, Martinez (2009) presented evidence on the younger than 40 age group, and the 40-49 age group relative to the 50-59 age group. For both of these age groups the odds ratio and confidence intervals were below one, suggesting that younger age has a protective effect. Park (2016) reported only the 70 year or older age group had statistically significantly increased risk for AN (HR 2.56 95%CI 1.43-4.59), whilst for the 50-70 year age group there was no statistically significant association. The association reported in Cubiella (2016) for the 60-69 year age group relative to the 50-59 year age group was not statistically significant. Two studies reported statistically significant increased risk for AN with increasing age, with age as a continuous variable the hazard ratio was 1.02 (95%CI 1.01-1.03) (Jung 2016) and with age increasing with yearly increments the odds ratio was 1.04 (95%CI 1.01-1.07) (Vempulapalli, 2014). Four studies (Atkin 2017; Cottet 2012; Huang 2012a; Coleman 2015) reported evidence on incidence of CRC at first surveillance. All four studies reported statistically significant associations between risk of CRC and increasing age, although it should be noted that there are a small number of events across each age group. All four studies used a younger age group as the reference (e.g. <55yrs; 50-60years) and reported risks for a range of different older age groups. Relative to patients younger than 55 years, Atkin (2017) reported only those 75 years or older had statistically significant increased risk for CRC at first surveillance with incidence reported as 5.08% and 5.58% respectively. Coleman (2015) reported, relative to the under 50 year group, significantly increased risks for CRC for the 60-69 group, the 70-79 group, and the 80 years or older group, with incidence of CRC at first surveillance reported as 2.7%, 3.7% 5.9% respectively, whereas there was no significantly increased risk in the 50-59 age group. Huang (2012a) reported on interval CRC showing a statistically significant increased risk for the 60 years or older age group (OR 1.34 95%CI 1.08-1.92) relative to the under 50 year age group, but this comparison was not significant for the 50-60 year age group. Cottet (2012) reported on the risk of CRC at first surveillance associated with increasing age groups for those with AA and those with non AA at index separately. For each of the age groups the standardised incidence ratio was statistically significant for those with AA at index (<60 years: SIR 3.65 95%CI 1.88 to 6.37; 60-79 years SIR 1.75 95%CI 1.18 to 2.50; ≥80 years SIR 3.32 95%CI 1.66 to 5.95). However, there was no increased risk associated with any of the three age groups when patients had a non AA at index. Long term CRC incidence was reported on in one study (Atkin 2017) reporting statistically significant increased risk relative to those younger than 55 years for those in the age range 65-74years (2.1%) and those 75 years and older (2.4%), but there was no statistically significant increased risk for long term CRC in the 55-64 age group. One study (Emilsson 2017) reported on long term CRC mortality relative to a 40-49 years age group, all older age groups up to those 80 years and older had a statistically significant increased risk (50-59 years HR 2.13 95%CI 1.38-3.27; 60-69 years HR 3.50 95%CI 2.31-5.29; 70-79 years HR 6.10 95%CI 4.03-9.22; 80 or older HR 14.97 95%CI 9.74-23.01). GRADE of recommendation: MODERATE





### CQ1.10

All studies assessing age as a prognostic risk factor use a younger age group as reference and is therefore included in CQ1.9, although it can be noted that those studies that did compare to cohorts older than 75 years did demonstrate a similar pattern in that there were statistically significant increased risks in these older cohorts compared to younger reference cohorts (<55 years), for AA (Atkin 2017) and AN (Martinez 2009) at first surveillance, for CRC incidence at first surveillance in two studies (Atkin 2017; Coleman 2015), yet only for those with an AA at index in a further study (Cottet 2012), for long term CRC incidence (Atkin 2017) and for long term CRC mortality (Emilsson 2017). GRADE of recommendation: MODERATE

### CQ1.11

Five studies, rated as low to moderate risk of bias (Lee 2017; Tae 2017; Park 2016; Jung 2016; Martinez 2009), presented evidence relating to the risks associated with smoking status. Two studies presented evidence on the risk for AA at first surveillance associated with being a smoker (Lee 2017; Tae 2017) reporting no statistically significantly increased risk. Three studies presented evidence on the risk of AN at first surveillance associated with being a smoker (Park 2016; Jung 2016; Martinez 2009), again no statistically significantly increased risk was reported. No studies presented evidence on CRC at next surveillance, long term CRC incidence, or long term CRC mortality. GRADE of recommendation: LOW.

### CQ1.12

Eight studies, rated as having a low to moderate risk of bias, provided evidence on the risks associated with high BMI (Kim 2012; Lee 2017; Tae 2017; Jang 2015; Laiyemo 2008; Park 2016; Jung 2016; Martinez 2009). Five studies reported evidence on the risk for AA at first surveillance associated with a high BMI (Kim 2012; Lee 2017; Tae 2017; Jang 2015; Laiyemo 2008). One study reported a statistically significantly increased risk of AA if patients had a BMI of 25 or above (HR 2.69 95%CI 1.64-4.42) (Kim 2012), and a second study (Laiyemo 2008) presented evidence that those with AA at index together with a high BMI were at increased risk of AA at first surveillance (RR 1.62 95%CI 1.01-2.57). The remaining three studies did not report statistically significant associations between the risk for AA at first surveillance and high BMI (Lee 2017; Tae 2017; Jang 2015). Three studies reported evidence on the risk for AN at first surveillance associated with a high BMI (Park 2016; Jung 2016; Martinez 2009) with none of these studies reporting a statistically significant association. No studies presented evidence on CRC at the next surveillance, long term CRC incidence or long term CRC mortality. GRADE of recommendation: LOW.

### CQ1.13

Five studies, ranging from low to high risk of bias, reported on the risks associated with different levels of bowel preparation quality (Atkin 2017; Facciorusso 2016; Jang 2015; Cubiella 2016; Van Heijningen 2013). Three studies reported evidence on the risks for AA at first surveillance (Atkin 2017; Facciorusso 2016; Jang 2015). Relative to excellent or good bowel preparation



there were statistically significant associations between poor bowel preparation and the risk for AA in two studies (Atkin 2017 [OR 1.54 95%CI 1.04-2.28]; Jang, 2015 [OR 2.208 95%CI 1.238-4.662]). There were no statistically significant associations between adequate, moderate, or satisfactory bowel preparation (relative to excellent) and the risk for AA. Two studies reported evidence on the risks for AN at first surveillance (Cubiella 2016; Van Heijningen 2013), with only one (Van Heijningen 2013) reporting a statistically significant increased risk for AN associated with insufficient bowel preparation relative to good bowel preparation with an incidence of AA of 17.7% and of CRC 2.2%. There was no increased risk when bowel preparation was reported as moderate in the same study, and also when bowel preparation was reported as adequate (relative to inadequate) in the second study (Cubiella 2016). One study (Atkin 2017) reported on incidence of CRC at first surveillance and presented similar findings in that there was only statistically significantly increased risk for CRC if bowel preparation was poor (OR 3.80 95%CI 1.79-8.05) and not if it were satisfactory. The same study (Atkin 2017) reported on long term CRC incidence and again the associations were only statistically significant for poor bowel preparation (HR 2.09 95%CI 1.19-3.67) and not for satisfactory bowel preparation. No studies were identified which presented evidence on long term CRC mortality. GRADE of recommendation: LOW.

#### CQ1.14

Three studies, ranging from low to high risk of bias, presented evidence on the risks associated with completeness of colonoscopy (Atkin 2017; Cubiella 2016; Van Heijningen 2013). Only one study (Atkin 2017) reported on the risks for AA at first surveillance associated with incomplete colonoscopy at index, reporting a statistically significant increased risk for AA (OR 1.92 95%CI 1.58-2.33). Two studies reported on the risk for AN at first surveillance and found no statistically significant association incomplete colonoscopy and the risk for AN. One study (Atkin 2017) presented evidence on the risk for CRC at first surveillance and found it statistically significantly increased if colonoscopy was incomplete at index (OR 4.28 95%CI 2.61-7.03), and the same study (Atkin 2017) presented evidence on long term CRC incidence, similarly finding statistically significantly increased risk if colonoscopy was incomplete at index (HR 1.80 95%CI 1.34-2.41). No studies were identified which presented evidence on long term CRC mortality. GRADE of recommendation: VERY LOW.

#### CQ1.15

One study (Jang 2015) reported on the risk for AA associated with a low quality colonoscopist at index, reporting no statistically significant association. Absolute values were not available for this risk factor, therefore, there is considerable uncertainty in the evidence. GRADE of recommendation: VERY LOW.

#### CQ1.16

There is no evidence to make an assessment of whether using high-adenoma-detecting technologies at index reduces risk for AA or CRC at first surveillance.

### **Results relating to CQ2**



No studies were included for CQ2, therefore was no evidence on which to make an assessment on whether 1st surveillance (as opposed to index colonoscopy polyp clearance) reduces future CRC risk, across any of the sixteen prognostic factors.

### ***Results relating to CQ3***

8 citations relating to 6 studies were included at full text (Atkin 2017; Atkin 2017a; Pinsky 2009; Lee 2017; Chung 2011; Cubiella 2016; Winawer 1993; Winawer 1993a). The evidence relating to each of the prognostic factors is presented in Table 7.



**Table 7. Findings from studies included for CQ3 for each of the prognostic factors.**

| First author, year         | Study design                             | Participants Age (M, SD unless otherwise specified) and Sex                                                                                                                                                                                                                                   | Follow up times                                                                                                                                          | Incidence of AA at next surv<br>Incidence CRC at next surv<br>Long term CRC incidence<br>Long term CRC mortality<br>Other results                                                                                                                                                                                                                                                                                                                                                                                                                                                                                                                                                                                                                                                                                                                                                                                                                                                                                                                                                                                                                                                                                                                                                                                                                                                                                                                                                                                                                                                                                                                                                                                                                                                                                                                                                                                                                                                                                                                                                                                                    | Level of evidence. (QUIPS / ROBINS-I) |
|----------------------------|------------------------------------------|-----------------------------------------------------------------------------------------------------------------------------------------------------------------------------------------------------------------------------------------------------------------------------------------------|----------------------------------------------------------------------------------------------------------------------------------------------------------|--------------------------------------------------------------------------------------------------------------------------------------------------------------------------------------------------------------------------------------------------------------------------------------------------------------------------------------------------------------------------------------------------------------------------------------------------------------------------------------------------------------------------------------------------------------------------------------------------------------------------------------------------------------------------------------------------------------------------------------------------------------------------------------------------------------------------------------------------------------------------------------------------------------------------------------------------------------------------------------------------------------------------------------------------------------------------------------------------------------------------------------------------------------------------------------------------------------------------------------------------------------------------------------------------------------------------------------------------------------------------------------------------------------------------------------------------------------------------------------------------------------------------------------------------------------------------------------------------------------------------------------------------------------------------------------------------------------------------------------------------------------------------------------------------------------------------------------------------------------------------------------------------------------------------------------------------------------------------------------------------------------------------------------------------------------------------------------------------------------------------------------|---------------------------------------|
| Atkin 2017 (& Atkin, 2017) | Retrospective, multicentre, cohort study | N = 11 944 patients with data available for analysis; 4608 attended one or more surveillance visits and 7336 patients did not attend surveillance. Age = Median age 66.7 years (IQR 58.4–74.0) <55yrs 2122 (18%); 55–64yrs 3179 (27%); 65–74yrs 3957 (33%); 75+ys 2686 (22%) Sex = 55.47 Male | FS or more (All surveillance intervals, 0, 1, 2 3+, plus comparisons of no surveillance v surveillance) Median follow up time 7.9 years, (IQR 5.6–11.1), | <p>Advanced adenoma: Interval between index and first surveillance &lt; 18 months (reference)(n (n=4318)</p> <p>2 years - UV 1.13 (0.92 to 1.40); MV 1.05 (0.83 to 1.33)</p> <p>3 years - UV 0.93 (0.75 to 1.15); MV 1.06 (0.83 to 1.34)</p> <p>4 years - UV 1.04 (0.76 to 1.43); MV 1.10 (0.78 to 1.55)</p> <p>5 years - UV 1.03 (0.70 to 1.53); MV 1.24 (0.81 to 1.91)</p> <p>6 years - UV 0.95 (0.57 to 1.60); MV 0.90 (0.51 to 1.61)</p> <p>≥ 6.5 years - UV 1.94 (1.26 to 2.98); MV 1.52 (0.90 to 2.57)</p> <p>Per year increase UV 1.04 (0.99 to 1.09) p 0.1103 MV interval as continuous 1.03 (0.98 to 1.09) p 0.2513 (no absolute values available)</p> <p>There was little evidence of a relationship between interval and AA at first surveillance, both before and after adjusting for other factors; the test statistics were non-significant and all but one 95% CI included 1, although there was a tendency towards increasing odds with increasing interval.</p> <p>CRC: : Interval between index and first surveillance &lt; 18 months (reference)(n (n=4318)</p> <p>2 years - UV 1.57 (0.91 to 2.69); MV 1.69 (0.94 to 3.03)</p> <p>3 years - UV 0.34 (0.14 to 0.82); MV 0.53 (0.22 to 1.31)</p> <p>4 years - UV 1.55 (0.73 to 3.31); MV 2.46 (1.12 to 5.44)</p> <p>5 years - UV 1.12 (0.39 to 3.22); MV 2.08 (0.70 to 6.18)</p> <p>6 years - UV 2.53 (0.96 to 6.65); MV 3.02 (1.00 to 9.10)</p> <p>≥ 6.5 years - UV 3.14 (1.28 to 7.72); MV 4.12 (1.37 to 12.41)</p> <p>Per year increase UV 1.13 (1.03 to 1.25) p 0.0232 n/a; MV interval as continuous 1.21 (1.08 to 1.37) 0.0040</p> <p>A longer interval was significantly associated with increased odds of CRC detection at first surveillance, both before and after adjustment, regardless of whether interval was modelled as a continuous or categorical variable. After adjustment for covariates there was 21% greater odds of finding CRC per year increase in interval (OR 1.21, 95% CI 1.08 to 1.37; p = 0.0040). There was evidence of weak negative confounding as the effect of interval became stronger after adjusting for other factors.</p> | Low risk of bias                      |
| Chung 2011                 | Prospective cohort                       | 671 low risk group (1 or 2 adenomas <10 mm) ; 539 high risk group (an advanced adenoma or >3 adenomas) Age = LR 57.8 + 8.3; HR 59.8 + 8.4                                                                                                                                                     | Median time between Index and FS 32.6m (range 11-78) and between 2nd and 3rd 37.6m (range 11-102m).                                                      | <p>Advanced Adenoma incidence at interval between index and first surveillance &lt;3yrs v 3-5 years</p> <p>Low Risk group = n 6/355 (7.1%) v n 7/316 (2.2%);</p> <p>High Risk group = n 52/516 (10.1%) v n 2/23 (8.7%)</p> <p>(only absolute values available, no statistical analyses)</p>                                                                                                                                                                                                                                                                                                                                                                                                                                                                                                                                                                                                                                                                                                                                                                                                                                                                                                                                                                                                                                                                                                                                                                                                                                                                                                                                                                                                                                                                                                                                                                                                                                                                                                                                                                                                                                          | Low risk of bias                      |



| First author, year               | Study design               | Participants Age (M, SD unless otherwise specified) and Sex                                                                                                       | Follow up times                                                           | Incidence of AA at next surv<br>Incidence CRC at next surv<br>Long term CRC incidence<br>Long term CRC mortality<br>Other results                                                                                                                                                                                                                                                                  | Level of evidence. (QUIPS / ROBINS-I) |
|----------------------------------|----------------------------|-------------------------------------------------------------------------------------------------------------------------------------------------------------------|---------------------------------------------------------------------------|----------------------------------------------------------------------------------------------------------------------------------------------------------------------------------------------------------------------------------------------------------------------------------------------------------------------------------------------------------------------------------------------------|---------------------------------------|
|                                  |                            | Sex = LR Male 68.3%; HR Male 73.3%                                                                                                                                |                                                                           |                                                                                                                                                                                                                                                                                                                                                                                                    |                                       |
| Winawer 1993 (and Winawer 1993a) | RCT (sub cohort)           | N = 1418<br>Age = 61.2 (9.8)<br>Sex = 70% Male                                                                                                                    | 1&3 vs 3 years follow-up: 3 years (Winawer 1993); 6 years (Winawer 1993a) | 1st surveillance @1 yr versus 3 yrs<br>Group A data @1 year: 0 CRC<br>Group B data @3 years: 2CRC<br>Surveillance at 1 yr + 3 yr versus only at 3 yrs<br>3- year follow-up<br>Group A: 1 CRC<br>Group B: 2 CRC<br>7 year follow-up (1993a)<br>Group A: 2 CRC<br>Group B: 3 CRC<br>(only absolute values available, no statistical analyses)                                                        | High risk of bias.                    |
| Lee 2017                         | Retrospective cohort       | N= 399<br>Age = 56.6±9.3<br>Sex = 69.7% Male                                                                                                                      | FS at 3 or 5 years (comparison) (data split by LRA and HRA)               | Advanced adenoma: MV analysis ≥3year surveillance interval independent risk factor for AA.<br>UV analysis OR (95%CI): ≥3year surveillance interval (LRA 5/221; HRA 3/178) <b>2.204 (0.866-5.607)P=0.097</b><br>MV analysis: <b>2.972 (1.114-7.928) P=0.030</b><br>UV analysis OR (95%CI): ≥5year surveillance interval(LRA 7/221; HRA 7/178) <b>2.304 (0.796-6.669)P=0.124</b><br>MV analysis: NR. | Low risk of bias                      |
| Pinsky 2009                      | Retrospective cohort study | N = 2607<br>Age = 63 years<br>Sex = 60% Male                                                                                                                      | FS mean 3.4 - 4.3 yrs (depending on index adenoma)                        | Advanced adenoma: MV OR<br>Ref: Interval from baseline to FS, less than or equal to 4 years (incidence of AA was 9.6% when surveillance was performed at 4 or less years after index) (incidence of AA was 8% when surveillance was performed at more than 4 years after index) Interval > 4 years, <b>0.86 (0.6 to 1.2)</b>                                                                       | Low risk of bias.                     |
| *Cubiella 2016                   | Retrospective cohort study | N = 5401 (2022 HR group; 3379 IR group)<br>Age = 60-69yr; HR 842 (60%); IR 1241 (58.2%); 50-59yrs; HR 562 (40%) IR 891 (41.8%).<br>Sex = Male HR 74.9%; IR 67.4%. | Mean follow up 2.8 years (SD 1 yr) for 65% of study population            | Advanced neoplasia: Time to 1 <sup>st</sup> surv <3yrs 14.4% (12.6-16.2) =>3yrs 13.3 (11.8-14.7)<br>OR <b>1.0 (0.8-1.2)</b>                                                                                                                                                                                                                                                                        | High risk of bias.                    |

OR=Odds ratios calculated using Logistic regression, and HR = Hazard ratios calculated using cox proportional hazards models unless otherwise stated. Absolute rates presented where available in the paper. \*Indicates the outcome measure is neoplasia rather than AA, = AA+CRC. MV= Multivariate; UV=Univariate

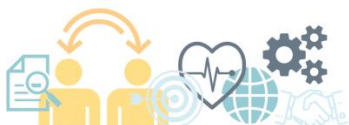

### Synthesis of evidence for CQ3

Six studies reported evidence relating to the surveillance interval for first surveillance (Atkin 2017; Atkin 2017a; Pinsky 2009; Lee 2017; Chung 2011; Cubiella 2016; Winawer 1993; Winawer 1993a). Although only four of these studies reported statistical analyses (Atkin 2017; Atkin 2017a; Pinsky 2009; Lee 2017; Cubiella 2016). The evidence demonstrated fairly consistently, although across a relatively small number of studies with the quality varying from high to low risk of bias, no statistically significant increased risk for AA, AN or CRC with increasing time interval between index and first surveillance, for intervals less than 3 years. Two studies (Atkin 2017; 2017a; Pinsky 2009) reported non significant associations between risk for AA and increasing interval between index and first surveillance. Atkin (2017; 2017a) reported a non significant but positive association, for the per year increase in risk for AA (OR 1.04 (0.99 to 1.09), this was also non significant in the multivariate analysis (OR 1.03 (0.98 to 1.09)). Again, when comparing the interval of less than 18 months to each time interval there was no statistically significant association (2 years: OR 1.05 (0.83 to 1.33); 3 years OR 1.06 (0.83 to 1.34); 4 years OR 1.10 (0.78 to 1.55); 5 years OR 1.24 (0.81 to 1.91); 6 years OR 0.90 (0.51 to 1.61)) until the comparison with 6.5 years or more where the unadjusted odds were 1.94 (1.26 to 2.98), although this association did not remain significant when adjusted for covariates. Pinsky (2009) also reported no significantly association for advanced adenoma when they compared incidence at first surveillance of 4 years or less to incidence after a 4 year interval. They showed that incidence of AA was 9.6% when surveillance was performed at 4 or fewer years after index, and incidence of AA was 8% when surveillance was performed at more than 4 years after index, with the associated odds of 0.86 (0.6 to 1.2). Chung (2011) reported on incidence of AA for the interval between index and first surveillance of less than 3 years compared to 3-5 years, for low risk (n6/355 (7.1%) v n7/316 (2.2%)) and high risk groups (n52/516 (10.1%) v n2/23 (8.7%)) but did not present statistical analyses. Contrary to these findings one study (Lee 2017) reported that an interval between index and first surveillance of 3 or more years was an independent risk factor for advanced adenoma, reporting an adjusted odds ratio of 2.972 (1.114–7.928 P=0.030), but there was no statistically significant association when the interval was 5 years or more (OR 2.304 (0.796–6.669)P=0.124.) One study only looked at advanced neoplasia (Cubiella 2016) and showed no significant association when comparing first surveillance at less than 3 years (14.4% (12.6–16.2)) to 3 or more years (13.3% (11.8–14.7)), with an associated odds ratio of 1.0 (0.8–1.2). Two studies reported on CRC incidence at next surveillance (Atkin 2017; Atkin 2017a; Winawer 1993; Winawer 1993a), although only Atkin (2017; 2017a) presented statistical analyses which showed that a longer interval was significantly associated with increased odds of CRC at first surveillance, both before and after adjustment.. They reported that after adjustment for covariates there was 21% greater odds of CRC incidence per year increase in interval (OR 1.21, 95% CI 1.08 to 1.37; p = 0.0040). When comparing the interval between index and first surveillance, relative to an interval of less than 18 months, the odds of finding CRC at 2, 3 or 5 years was not statistically significant, although there was a significant association at 4 years with an adjusted odds ratio of 2.46 (1.12 to 5.44); at 6 years 2.08 (0.70 to 6.18), and at 6.5 or more years 4.12 (1.37 to 12.41). There was no evidence relating to long term CRC incidence and long term CRC mortality. GRADE of recommendation: LOW

### Results relating to CQ4

Two citations relating to 1 study were included at full text (Atkin et al., 2017; Atkin et al 2017a). Evidence was reported in one large study with a low risk of bias. Although some statistically significant associations between risk of advanced adenoma or colorectal cancer at

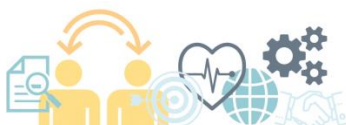

second surveillance and prognostic factors identified at first surveillance were reported, for some prognostic factors the number of patients was small, and the reported associations were not statistically significant. The evidence relating to each of the prognostic factors is presented in Tables 8 and 9.

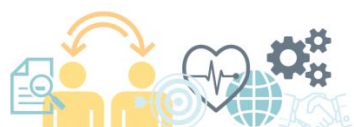

**Table 8. Study Characteristics for the one study included for CQ4.**

| First author, year              | Study design                             | Participants Age (M, SD unless otherwise specified) and Sex                                                                                                                                                                                                                                   | Follow up times                                                                                                                                          | Level of evidence (QUIPS). |
|---------------------------------|------------------------------------------|-----------------------------------------------------------------------------------------------------------------------------------------------------------------------------------------------------------------------------------------------------------------------------------------------|----------------------------------------------------------------------------------------------------------------------------------------------------------|----------------------------|
| Atkin 2017 (Atkin et al, 2017a) | Retrospective, multicentre, cohort study | N = 11 944 (5019; 42% did not attend surveillance; 6925; 58% attended one or more surveillance visits.<br>N= 1635 for 2 <sup>nd</sup> surveillance analyses.<br>Age = Median age 66.7 years (IQR 58.4–74.0)<br><55yrs 2122 (18%); 55-64yrs 3179 (27%); 65-74yrs 3957 (33%); 75+yrs 2686 (22%) | FS or more (All surveillance intervals, 0, 1, 2 3+, plus comparisons of no surveillance v surveillance) Median follow up time 7.9 years, (IQR 5.6–11.1), | Low risk of bias           |

**Table 9. Findings from studies included for CQ4 for each of the prognostic factors.**

| Incidence of AA at next surveillance                                                                                                                                                                                                            | Incidence CRC at next surveillance                                                                                                                                |
|-------------------------------------------------------------------------------------------------------------------------------------------------------------------------------------------------------------------------------------------------|-------------------------------------------------------------------------------------------------------------------------------------------------------------------|
| <b>CQ4.1 High grade dysplasia v low grade</b>                                                                                                                                                                                                   |                                                                                                                                                                   |
| Worst dysplasia:UV ref no adenoma (n:75/1010)<br>Low grade (n=61/508) OR:1.70 (1.19 to 2.43)<br>High grade (n=4/46) OR 1.19 (0.41 to 3.40)<br>Unknown (n=6/71) OR:1.15 (0.48 to 2.74)                                                           | Worst dysplasia:UV ref no adenoma (n=6/1010)<br>Low grade (n=3/508)OR: 0.99 (0.25 to 3.99)<br>High grade n=(0/46)OR: n/a<br>Unknown (n=0/46)OR: n/a               |
| <b>CQ4.2 Polyp: Villous component ≥25% (tubulovillous or villous histology) Polyp: NO Villous component ≥25% (tubulovillous or</b>                                                                                                              |                                                                                                                                                                   |
| Worst histology: UV ref<br>No adenomas (n=75/1010) OR:1<br>Tubular (n=33/340) OR: 1.34 (0.87 to 2.06)<br>Tubulovillous (n=19/156) OR:1.73 (1.01 to 2.95)<br>Villous (n=10/66) OR:2.23 (1.09 to 4.54)<br>Unknown (n=9/63) OR=2.08 (0.99 to 4.37) | Worst histology: UV ref<br>No adenomas (n6/1010)<br>Tubular (n2/340) 0.99 (0.20 to 4.93)<br>Tubulovillous 0<br>Villous (n=1/66) 2.57 (0.31 to 21.70)<br>Unknown 0 |
| <b>CQ4.3 Polyp: Size of largest adenoma (variants: ≥10mm, or ≥20mm) Polyp: Size of largest adenoma NOT greater than (variants: ≥10mm, or ≥20mm)</b>                                                                                             |                                                                                                                                                                   |
| UV Largest size (mm) ref No adenomas (n75/1010)<br>< 10 (n36/379) 1.31 (0.86 to 1.98)<br>10–14 (n8/95) 1.15 (0.54 to 2.45)<br>15–19 (n7/52) 1.94 (0.85 to 4.45)<br>≥ 20 (n15/75) 3.12 (1.69 to 5.75)<br>Unknown (n5/24) 3.28 (1.19 to 9.03)     | UV Largest size (mm) ref No adenomas (n6/1010)<br>< 10 (n2/340) 1.34 (0.33 to 5.37)<br>10-14 0<br>15-19 0<br>≥20 0<br>Unknown 0                                   |
| <b>CQ4.4 Polyp: Number of adenomas (variants: 1,2,3,4,5-9,10+; the main categories may be 1-2, 3-4 and 5+ but we would like to capture all reported variations) N/a</b>                                                                         |                                                                                                                                                                   |
| UV OR: Number ref 0 (n75/1010)<br>1 (n39/429) 1.25 (0.83 to 1.87)<br>2 (n20/117) 2.57 (1.50 to 4.39)<br>3 (n4/37) 1.51 (0.52 to 4.38)<br>4 (n4/21) 2.93 (0.96 to 8.94)<br>5+ (4/21) 2.93 (0.96 to 8.94)                                         | UV Number ref 0 (n6/1010)<br>1 (n2/429) 0.78 (0.16 to 3.90)<br>2 (n1/117) 1.44 (0.17 to 12.09)<br>3 0<br>4 0<br>5+ 0                                              |
| <b>CQ4.5 Polyp: Presence of adenoma in proximal colon Polyp: Absence of adenoma in proximal colon</b>                                                                                                                                           |                                                                                                                                                                   |
| UV OR Proximal adenomas ref No adenomas (n75/1010)<br>No (n31/319) 1.34 (0.87 to 2.08)<br>Yes (n40/306) 1.87 (1.25 to 2.82)                                                                                                                     | UV OR Proximal adenomas ref No adenomas (n6/1010)<br>No 0<br>Yes (n3/306) 1.66 (0.41 to 6.66)                                                                     |

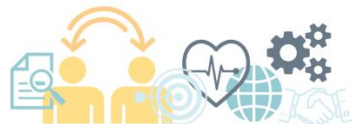



| <b>Incidence of AA at next surveillance</b>                                                                                                                                  | <b>Incidence CRC at next surveillance</b>                                |
|------------------------------------------------------------------------------------------------------------------------------------------------------------------------------|--------------------------------------------------------------------------|
| Proximal polyps ref No polyps (n44/667)                                                                                                                                      | Proximal polyps ref No polyps (n5/667)                                   |
| No (n40/499) <b>1.23 (0.79 to 1.93)</b>                                                                                                                                      | No (n1/499) <b>0.27 (0.03 to 2.28)</b>                                   |
| Yes (n62/469) <b>2.16 (1.44 to 3.24)</b>                                                                                                                                     | Yes (n3/469) <b>0.85 (0.20 to 3.58)</b>                                  |
| <b>CQ4.6 Polyp: Adenoma morphology (variants: pedunculated, sessile, flat) N/a</b>                                                                                           |                                                                          |
| <b>CQ4.7 Patient: Male gender Patient: Female gender Low risk of bias</b>                                                                                                    |                                                                          |
| UV OR Gender Male ref (n90/956)                                                                                                                                              | UV OR Gender Male ref (n5/956)                                           |
| Female (n56/679) <b>0.86 (0.61 to 1.23)</b>                                                                                                                                  | Female (n4/679) <b>1.13 (0.30 to 4.21)</b>                               |
| <b>CQ4.8 Patient: Family history of CRC Patient: NO Family history of CRC</b>                                                                                                |                                                                          |
| <b>CQ4.9 Patient: Younger age (e.g. &lt;55 vs 55+; there will be other variants of age cut-off and we would like to capture these too) Patient: NOT in Younger age range</b> |                                                                          |
| Age (years) at first follow-up ref < 55 (n25/329)                                                                                                                            | Age (years) at first follow-up ref < 55 (n2/329)                         |
| ≥ 55 and < 60 (n21/256) <b>1.09 (0.59 to 1.99)</b>                                                                                                                           | ≥ 55 and < 60 <b>0</b>                                                   |
| ≥ 60 and < 65 (n30/279) <b>1.47 (0.84 to 2.56)</b>                                                                                                                           | ≥ 60 and < 65 (n2/279) <b>1.18 (0.17 to 8.44)</b>                        |
| ≥ 65 and < 70 (n31/305) <b>1.38 (0.79 to 2.39)</b>                                                                                                                           | ≥ 65 and < 70 (n1/305) <b>0.54 (0.05 to 5.96)</b>                        |
| ≥ 70 and < 75 (n19/253) <b>0.99 (0.53 to 1.84)</b>                                                                                                                           | ≥ 70 and < 75 (n1/253) <b>0.65 (0.06 to 7.20)</b>                        |
| ≥ 75 and < 80 (n13/142) <b>1.23 (0.61 to 2.47)</b>                                                                                                                           | ≥ 75 and < 80 (n2/142) <b>2.34 (0.33 to 16.75)</b>                       |
| ≥ 80 (n7/71) <b>1.33 (0.55 to 3.21)</b>                                                                                                                                      | ≥ 80 (n1/71) <b>2.34 (0.21 to 26.12)</b>                                 |
| <b>CQ4.10 Patient: Older age (e.g. &lt;75 vs 75+; there will be other variants of age cut-off and we would like to capture these too) Patient: NOT in Older age range</b>    |                                                                          |
| <b>CQ4.11 Patient: Smoking (variants: current, ex, never) N/a</b>                                                                                                            |                                                                          |
| <b>CQ4.12 Patient: High body mass index (e.g. BMI&gt;25)? Patient: NOT High body mass index</b>                                                                              |                                                                          |
| <b>CQ4.13 Index colonoscopy Bowel prep quality (variants: good, adequate, inadequate/poor) Inadequate/poor bowel prep</b>                                                    |                                                                          |
| UV OR Best bowel preparation at colonoscopy, Excellent/good ref (n31/464)                                                                                                    | UV OR Best bowel preparation at colonoscopy, Excellent/good ref (n2/464) |
| Satisfactory (n27/169) <b>2.66 (1.53 to 4.60)</b>                                                                                                                            | Satisfactory (1/169) <b>1.38 (0.12 to 15.26)</b>                         |
| Poor (n5/68) <b>1.11 (0.42 to 2.96)</b>                                                                                                                                      | Poor (n1/68) <b>3.45 (0.31 to 38.54)</b>                                 |
| Unknown (n58/661) <b>1.34 (0.85 to 2.11)</b>                                                                                                                                 | Unknown (n4/661) <b>1.41 (0.26 to 7.71)</b>                              |
| <b>CQ4.14 Index colonoscopy complete to caecum incomplete colonoscopy</b>                                                                                                    |                                                                          |
| UV OR Most complete examination, ref Complete colonoscopy (n101/1087)                                                                                                        | UV OR Most complete examination, ref Complete colonoscopy (n4/1087)      |
| Colonoscopy of unknown completeness (n8/130) <b>0.64 (0.30 to 1.35)</b>                                                                                                      | Colonoscopy of unknown completeness (n1/130) <b>2.10 (0.23 to 18.92)</b> |
| Incomplete colonoscopy (n12/145) <b>0.88 (0.47 to 1.65)</b>                                                                                                                  | Incomplete colonoscopy (n3/145) <b>5.72 (1.27 to 25.87)</b>              |
| <b>CQ4.15 Index colonoscopy by high-quality colonoscopist NOT high quality colonoscopist</b>                                                                                 |                                                                          |
| <b>CQ4.16 Index colonoscopy using high-adenoma-detecting technologies (variants: HD scope, chromoendoscopy) no high-adenoma-detecting technologies</b>                       |                                                                          |

Odds ratios (OR) calculated using Logistic regression, and Hazard ratios (HR) calculated using cox proportional hazards models unless otherwise stated. Absolute values presented where available. N = total number of patients; n = number of patients with outcome at second surveillance of total with prognostic factor at first surveillance. UV = Univariate (unadjusted). IQR = Interquartile range.



### Synthesis of evidence for CQ4

#### CQ4.1

One study rated as having a low risk of bias reported findings regarding high grade dysplasia. When the reference was no adenoma at first surveillance, there was no statistically significant association between high grade dysplasia at first surveillance colonoscopy and risk for AA at second surveillance (OR 1.19, 95% CI: 0.48 to 2.74) (Atkin 2017; Atkin 2017a). Although this result was not statistically significant, uncertainty is expected due to the small number of patients with high grade dysplasia at first surveillance (n=46) and the point estimate suggests that patients with high grade dysplasia may be at increased risk. A greater number of patients had low grade dysplasia (n=508) and there was a statistically significant association of low grade adenoma and AA at second surveillance (OR 1.70, 95%CI: 1.19 to 2.43) (Atkin 2017; Atkin 2017a). There were no CRC events at second surveillance for patients with high grade dysplasia (unadjusted OR: n/a). There is no evidence for long term CRC incidence or CRC mortality. GRADE of recommendation: LOW

#### CQ4.2

One study rated as having a low risk of bias reported findings regarding the risk of AA or CRC associated with different types of histology at first surveillance with the reference as no adenoma. Risk for AA at second surveillance was increased if tubulovillous (OR 1.73, 95%CI: 1.01 to 2.93) or villous components (OR 2.23, 95%CI: 1.09 to 4.54) were identified at first surveillance (Atkin 2017; Atkin 2017a). There were no CRC events at second surveillance for patients with tubulovillous components (unadjusted OR: n/a). For Villous components, the magnitude of the OR suggests an increased CRC risk however the number of events were small and the result is not statistically significant (OR 2.57, 95%CI: 0.31 to 21.70) (Atkin 2017; Atkin 2017a). There is no evidence for long term CRC incidence or CRC mortality. GRADE of recommendation: LOW

#### CQ4.3

Only one study rated as having a low risk of bias reported evidence on risk for AA and CRC at second surveillance, with the reference as no adenomas at first surveillance. Risk for AA at second surveillance was statistically significantly increased if the size of the adenoma at first surveillance was equal to or greater than 20mm (OR 3.12, 95%CI: 1.69 to 5.75) (Atkin 2017; Atkin 2017a). For adenomas of a smaller size the magnitude of the ORs suggests an increased CRC risk however the result are not statistically significant. There were no CRC events at second surveillance for patients with adenomas >10mm. For patients with adenomas <10 there was an increased risk of CRC, however the result was not statistically significant (OR 1.34, 95%CI: 0.33 to 5.37) (Atkin 2017; Atkin 2017a). There is no evidence for long term CRC incidence or CRC mortality. GRADE of recommendation: LOW.

#### CQ4.4

Only one study rated as having a low risk of bias reported evidence on risk for AA and CRC at second surveillance, with the reference as no adenomas at first surveillance. Risk for AA at second surveillance was statistically significantly increased if the number of adenomas at first surveillance was two (OR 2.57 95%CI 1.50 to 4.39), although there was no statistically significant increased risk for AA for if patients had one, three, four or five (or more) adenomas at first surveillance. There was no statistically significant association for any number of adenomas at first surveillance and risk of CRC at second surveillance (Atkin 2017; Atkin 2017a). Although it should be noted that as the number of events in each category was small



the findings are uncertain. There is no evidence for long term CRC incidence or CRC mortality. GRADE of recommendation: LOW

#### CQ4.5

Only one study rated as having a low risk of bias reported evidence on risk for AA and CRC at second surveillance, with the reference as no adenomas at first surveillance. Risk for AA at second surveillance was increased if an adenoma or polyp was identified at a proximal location at first surveillance (OR 1.87 95%CI 1.25 to 2.82). There was no such association for CRC (Atkin 2017; Atkin 2017a). There is no evidence for long term CRC incidence or CRC mortality. GRADE of recommendation: LOW

#### CQ4.6

There is no evidence on which to make an assessment of whether adenoma morphology at first surveillance has a significant impact on findings at second surveillance.

#### CQ4.7

There was no statistically significant association between male gender at first surveillance colonoscopy and risk for AA and CRC at second surveillance (Atkin 2017; Atkin 2017a). There is no evidence for long term CRC incidence or CRC mortality. GRADE of recommendation: LOW

#### CQ4.8

There is no evidence on which to make an assessment of whether a family history of CRC at first surveillance has a significant impact on findings at second surveillance.

#### CQ4.9

There were no statistically significant associations between age at first surveillance colonoscopy and risk for AA and CRC at second surveillance, although the general trend was for increased risk in most age groups compared to the reference category (Atkin 2017; Atkin 2017a). There is no evidence for long term CRC incidence or CRC mortality. GRADE of recommendation: LOW

#### CQ4.10

There were no statistically significant associations between older age at first surveillance colonoscopy and risk for AA and CRC at second surveillance, although the general trend was for increased risk in most age groups compared to the reference category (Atkin 2017; Atkin 2017a). There is no evidence for long term CRC incidence or CRC mortality. GRADE of recommendation: LOW

#### CQ4.11

There is no evidence on which to make an assessment of whether being a smoker at first surveillance has a significant impact on findings at second surveillance.

#### CQ4.12

There is no evidence on which to make an assessment of whether having a high BMI at first surveillance has a significant impact on findings at second surveillance.

#### CQ4.13

Only one study rated as having a low risk of bias reported evidence on risk for AA and CRC at second surveillance, with the reference as excellent or good bowel preparation at first



surveillance. There is little evidence for an association between bowel preparation quality at first surveillance and the risk of AA or CRC at second surveillance. There was only one statistically significant association reported showing the risk for AA was increased if bowel preparation quality was satisfactory (OR 2.66 95%CI 1.53 to 4.60), all other associations were not statistically significant for AA or CRC incidence (Atkin 2017; Atkin 2017a). There is no evidence for long term CRC incidence or CRC mortality. GRADE of recommendation: LOW

#### CQ4.14

Only one study rated as having a low risk of bias reported evidence on risk for AA and CRC at second surveillance, with the reference complete colonoscopy at first surveillance. There was no evidence for a statistically significant association between the risk of AA at second surveillance and completeness of the colonoscopy at first surveillance, however there was a significant association between the risk of CRC at second surveillance where the colonoscopy at first surveillance was reported as incomplete (OR 5.72 95%CI 1.27 to 25.87)(Atkin 2017; Atkin 2017a). There was no evidence for long term CRC incidence or CRC mortality. GRADE of recommendation: LOW

#### CQ4.15

There is no evidence on which to make an assessment of whether the colonoscopy is performed by a high quality colonoscopist at first surveillance has a significant impact on findings at second surveillance.

#### CQ4.16

There is no evidence on which to make an assessment of whether the colonoscopy is performed using high-adenoma-detecting technologies at first surveillance has a significant impact on findings at second surveillance.

### **Results relating to CQ5**

Three citations relating to 2 retrospective cohort studies were included at full text (Chung et al., 2013; Morelli et al., 2013; Imperiale et al., 2014). Each study examined different prognostic predictors for advanced colorectal adenomas (AA) after first surveillance but did not report evidence on colorectal cancer (CRC) risk. The studies were rated as having a moderate to low risk of bias. Evidence was only reported for CQ5.7, CQ5.9, and CQ5.12, and is shown in table 10.



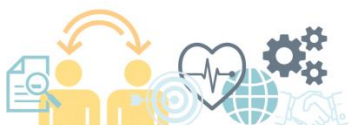

**Table 10. Findings from studies included for CQ5 for each of the prognostic factors.**

| First author, year                                                                                                                                                           | Study design         | Participants Age (M, SD unless otherwise specified) and Sex | Follow up times                                                                                                                                                                                  | Incidence of AA at next surv                            | Incidence CRC at next surv | Long term CRC incidence | Long term CRC mortality | Other results | Level of evidence. |
|------------------------------------------------------------------------------------------------------------------------------------------------------------------------------|----------------------|-------------------------------------------------------------|--------------------------------------------------------------------------------------------------------------------------------------------------------------------------------------------------|---------------------------------------------------------|----------------------------|-------------------------|-------------------------|---------------|--------------------|
| <b>CQ5.1 High grade dysplasia v low grade</b>                                                                                                                                |                      |                                                             |                                                                                                                                                                                                  |                                                         |                            |                         |                         |               |                    |
| <b>CQ5.2 Polyp: Villous component ≥25% (tubulovillous or villous histology) Polyp: NO Villous component ≥25% (tubulovillous or</b>                                           |                      |                                                             |                                                                                                                                                                                                  |                                                         |                            |                         |                         |               |                    |
| <b>CQ5.3 Polyp: Size of largest adenoma (variants: ≥10mm, or ≥20mm) Polyp: Size of largest adenoma NOT greater than (variants: ≥10mm, or ≥20mm)</b>                          |                      |                                                             |                                                                                                                                                                                                  |                                                         |                            |                         |                         |               |                    |
| <b>CQ5.4 Polyp: Number of adenomas (variants: 1,2,3,4,5-9,10+; the main categories may be 1-2, 3-4 and 5+ but we would like to capture all reported variations) N/a</b>      |                      |                                                             |                                                                                                                                                                                                  |                                                         |                            |                         |                         |               |                    |
| <b>CQ5.5 Polyp: Presence of adenoma in proximal colon Polyp: Absence of adenoma in proximal colon</b>                                                                        |                      |                                                             |                                                                                                                                                                                                  |                                                         |                            |                         |                         |               |                    |
| <b>CQ5.6 Polyp: Adenoma morphology (variants: pedunculated, sessile, flat) N/a</b>                                                                                           |                      |                                                             |                                                                                                                                                                                                  |                                                         |                            |                         |                         |               |                    |
| <b>CQ5.7 Patient: Male gender Patient: Female gender</b>                                                                                                                     |                      |                                                             |                                                                                                                                                                                                  |                                                         |                            |                         |                         |               |                    |
| Chung 2013<br>Predictors of a 'high risk adenoma' at 2 <sup>nd</sup> surveillance – by characteristics at index or 1 <sup>st</sup> surveillance                              | Retrospective cohort | N = 131<br>Age = 65.5 ± 8.5<br>Sex = 82.4% Male             | The median interval (min-max) between the first and second colonoscopy was 17 (6-101) months, while the median interval (min-max) between the second and third colonoscopy was 24 (6-90) months. | UV HR: 0.46 (0.11-1.93)<br>MV 0.00                      |                            |                         |                         |               | Low risk of bias.  |
| Imperiale, 2014(Morelli 2013)                                                                                                                                                | Retrospective cohort | N = 965<br>Age = 57.8 (9.8)<br>Sex = 62% Male               | Mean (median) SD interval between index and first surveillance colonoscopies was 33.9 (36.3) 20.2 months; and 44.1 (38.5) 18.6 months between first and second surveillance.                     | Men v women:<br>MV OR (95% CI) 0.81 (0.46-1.44)         |                            |                         |                         |               | Low risk of bias.  |
| <b>CQ5.8 Patient: Family history of CRC Patient: NO Family history of CRC</b>                                                                                                |                      |                                                             |                                                                                                                                                                                                  |                                                         |                            |                         |                         |               |                    |
| <b>CQ5.9 Patient: Younger age (e.g. &lt;55 vs 55+; there will be other variants of age cut-off and we would like to capture these too) Patient: NOT in Younger age range</b> |                      |                                                             |                                                                                                                                                                                                  |                                                         |                            |                         |                         |               |                    |
| Chung 2013                                                                                                                                                                   |                      |                                                             |                                                                                                                                                                                                  | UV HR: 1.02 (0.97-1.07)<br>MV HR: 1.02 (0.93-1.12)      |                            |                         |                         |               | Low risk of bias.  |
| Imperiale, 2014(Morelli 2013)                                                                                                                                                |                      |                                                             |                                                                                                                                                                                                  | Age (increase of 10 yr) MV OR (95%CI): 1.30 (0.97-1.75) |                            |                         |                         |               | Low risk of bias   |
| <b>CQ5.10 Patient: Older age (e.g. &lt;75 vs 75+; there will be other variants of age cut-off and we would like to capture these too) Patient: NOT in Older age range</b>    |                      |                                                             |                                                                                                                                                                                                  |                                                         |                            |                         |                         |               |                    |
| <b>CQ5.11 Patient: Smoking (variants: current, ex, never) N/a</b>                                                                                                            |                      |                                                             |                                                                                                                                                                                                  |                                                         |                            |                         |                         |               |                    |
| <b>CQ5.12 Patient: High body mass index (e.g. BMI&gt;25)? Patient: NOT High body mass index</b>                                                                              |                      |                                                             |                                                                                                                                                                                                  |                                                         |                            |                         |                         |               |                    |

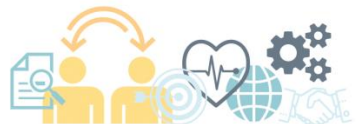

| First author, year                                                                                                                                     | Study design | Participants Age (M, SD unless otherwise specified) and Sex | Follow up times | Incidence of AA at next surv                       | Incidence CRC at next surv | Long term CRC incidence | Long term CRC mortality | Other results | Level of evidence. |
|--------------------------------------------------------------------------------------------------------------------------------------------------------|--------------|-------------------------------------------------------------|-----------------|----------------------------------------------------|----------------------------|-------------------------|-------------------------|---------------|--------------------|
| Chung 2013                                                                                                                                             |              |                                                             |                 | UV HR: 0.75 (0.58-0.98)<br>MV HR: 0.71 (0.50-1.01) |                            |                         |                         |               | Low risk of bias.  |
| <b>CQ5.13 Index colonoscopy Bowel prep quality (variants: good, adequate, inadequate/poor) Inadequate/poor bowel prep</b>                              |              |                                                             |                 |                                                    |                            |                         |                         |               |                    |
| <b>CQ5.14 Index colonoscopy complete to caecum incomplete colonoscopy</b>                                                                              |              |                                                             |                 |                                                    |                            |                         |                         |               |                    |
| <b>CQ5.15 Index colonoscopy by high-quality colonoscopist NOT high quality colonoscopist</b>                                                           |              |                                                             |                 |                                                    |                            |                         |                         |               |                    |
| <b>CQ5.16 Index colonoscopy using high-adenoma-detecting technologies (variants: HD scope, chromoendoscopy) no high-adenoma-detecting technologies</b> |              |                                                             |                 |                                                    |                            |                         |                         |               |                    |

Odds ratios (OR) calculated using Logistic regression, and Hazard ratios (HR) calculated using cox proportional hazards models unless otherwise stated. Absolute values presented where available. UV Univariate; MV Multivariate.

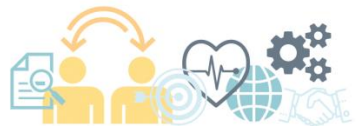

### *Synthesis of evidence for CQ5*

#### CQ5.7

Two studies (Chung 2013; Morelli 2014; Imperiale 2013) reported no significant association between male gender at first surveillance colonoscopy and risk for advanced adenoma at second surveillance. There was no evidence for CRC at second surveillance, long term CRC incidence or CRC mortality. GRADE of recommendation: LOW

#### CQ5.9

Two studies reported on an association between increasing age and the risk of advanced adenoma at second surveillance (Chung et al., 2013; Morelli et al., 2014; Imperiale et al., 2013). Morelli et al. (2013) reported a statistically significant association between increasing age (increase of 10 years) and risk of AA at second surveillance (OR 1.30 95%CI 0.97-1.75) whereas the similar analyses in Chung et al. were not statistically significant, although the association was still positive and the lack of statistical significance may have been due to the difference in the analyses, with Chung et al., analysing a 1 year increase. There was no evidence for CRC at second surveillance, long term CRC incidence or CRC mortality. GRADE of recommendation: LOW.

#### CQ5.12

One study reported evidence relating to BMI at index and first surveillance and the risk for AA or CRC (high risk adenomas) at second surveillance (Chung, 2013). Although increasing BMI at index and first surveillance was not associated with increased risk for AA or CRC at second surveillance, a statistically significant reduced risk for AA or CRC with increasing BMI was reported in univariate analysis (HR 0.75 95%CI 0.58-0.98) and this finding was close to significance in the multivariate analysis. There was no evidence for CRC at second surveillance, long term CRC incidence or CRC mortality. GRADE of recommendation: LOW.

### *Results relating to CQ6*

No studies were included for CQ6, therefore there was no evidence on which to make an assessment on whether 2nd (and subsequent) surveillance reduces future CRC risk, across any of the sixteen prognostic factors.

### *Results relating to CQ7*

Three citations relating to 2 studies were included at full text (Atkin 2017; Atkin 2017a; Miller 2011). The evidence relating to this question is presented in Table 11.







**Table 11. Findings from studies included for CQ7 for each of the prognostic factors.**

| First author, year | Study design                             | Participants Age (M, SD unless otherwise specified) and Sex                                                                                                                                                                                                                                                               | Follow up times                                                                                                                                          | Incidence of AA at next surv<br>Incidence CRC at next surv<br>Long term CRC incidence<br>Long term CRC mortality<br>Other results                                                                                                                                                                                                                                                                                                                                                                                                                                                                                                                                                                                                                                                                                  | Level of evidence.     |
|--------------------|------------------------------------------|---------------------------------------------------------------------------------------------------------------------------------------------------------------------------------------------------------------------------------------------------------------------------------------------------------------------------|----------------------------------------------------------------------------------------------------------------------------------------------------------|--------------------------------------------------------------------------------------------------------------------------------------------------------------------------------------------------------------------------------------------------------------------------------------------------------------------------------------------------------------------------------------------------------------------------------------------------------------------------------------------------------------------------------------------------------------------------------------------------------------------------------------------------------------------------------------------------------------------------------------------------------------------------------------------------------------------|------------------------|
| Atkin 2017*        | Retrospective, multicentre, cohort study | N = <b>11 944</b> patients with data available for analysis; <b>4608</b> attended one or more surveillance visits and <b>7336</b> patients did not attend surveillance. Age = Median age 66.7 years (IQR 58.4–74.0)<br><55yrs 2122 (18%); 55–64yrs 3179 (27%); 65–74yrs 3957 (33%); 75+yrs 2686 (22%)<br>Sex = 55.47 Male | FS or more (All surveillance intervals, 0, 1, 2 3+, plus comparisons of no surveillance v surveillance) Median follow up time 7.9 years, (IQR 5.6–11.1), | New advanced neoplasia<br>Interval between first and second surveillance < 18 months (reference) (n=1635)<br>2 years (n35/376) - UV 1.30 (0.78 to 2.18); MV 1.62 (0.93 to 2.81)<br>3 years (n52/518) - UV 1.42 (0.88 to 2.28); MV 2.02 (1.19 to 3.42)<br>4 years (n15/152) - UV 1.39 (0.72 to 2.67); MV 2.45 (1.20 to 5.00)<br>5 years (n11/131) - UV 1.16 (0.56 to 2.40); MV 2.01 (0.91 to 4.44)<br>6 years (n4/31) - UV 1.18 (0.62 to 5.74); MV 2.76 (0.84 to 9.12)<br>≥ 6.5 years (n7/30) - UV 3.86 (1.53 to 9.76); MV 5.95 (2.15 to 16.46)<br><br>Per year increase UV 1.11 (1 to 1.24) p 0.0501 MV interval as continuous 1.22 (1.09 to 1.36) p 0.0010<br><br>(As so few CRCs were found at 2 <sup>nd</sup> surveillance, new AA and CRC were combined and new AN was treated as the outcome measure instead. | Low risk of bias       |
| Miller 2011        | Retrospective cohort                     | N = 88<br>Age = 61.2 +/- 8.2 years (range 49-85)<br>Sex = 59.1% Male                                                                                                                                                                                                                                                      | Median time between Index and FS 32.6m (range 11-78) and between 2nd and 3rd 37.6m (range 11-102m).                                                      | Interval between FS and SS (=>3 Years) OR 0.95 (0.37,2.49) for AA                                                                                                                                                                                                                                                                                                                                                                                                                                                                                                                                                                                                                                                                                                                                                  | Moderate risk of bias. |

Odds ratios calculated using Logistic regression, and Hazard ratios calculated using cox proportional hazards models unless otherwise stated. Absolute rates presented where available in the paper. \*Indicates the outcome measure is neoplasia rather than AA, = AA+CRC. UV Univariate; MV Multivariate



### Synthesis of evidence for CQ7

Two studies examined the interval between first and second surveillance (Atkin 2017; Atkin 2017a; Miller 2011). One study rated as having a low risk of bias (Atkin 2017; 2017a) was only able to report on advanced neoplasia (AN) (a composite of AA and CRC) due to a very small number of CRC events occurring. This study demonstrated statistically significant increased odds of AN per year increase (OR 1.11 95%CI 1 to 1.24), this was also significant in multivariate analysis (OR 1.22 95%CI 1.09 to 1.36). Although when comparing the interval of less than 18 months to a 2 year interval the multivariate association was not statistically significant, but did show increased risk, this association was statistically significant when comparing less than 18 months and 3 years (OR 2.02 95%CI 1.19 to 3.42) , and less than 18 months and 4 years (OR 2.45 95%CI 1.20 to 5.00), and less than 18 months and more than 6.5 years (OR 5.95 95%CI 2.15 to 16.46) (comparisons of less than 18 months and 5 or 6 years were not significant). The second study rated as having a moderate risk of bias (Miller 2011) did not find a statistically significant positive association between risk for advanced adenoma and interval between first and second surveillance when the interval was 3 or more years. There was no evidence for long term CRC incidence or CRC mortality. GRADE of recommendation: LOW

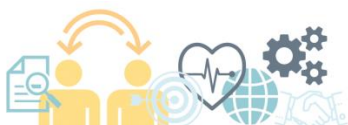



## References

- ATKIN, W., BRENNER, A., MARTIN, J., WOOLDRAGE, K., SHAH, U., LUCAS, F., GRELIAK, P., PACK, K., KRALJ-HANS, I., THOMSON, A., PERERA, S., WOOD, J., MILES, A., WARDLE, J., KEARNS, B., TAPPENDEN, P., MYLES, J., VEITCH, A. & DUFFY, S. W. 2017. The clinical effectiveness of different surveillance strategies to prevent colorectal cancer in people with intermediate-grade colorectal adenomas: a retrospective cohort analysis, and psychological and economic evaluations. *Health Technology Assessment (Winchester, England)*, 21, 1-536.
- ATKIN, W., WOOLDRAGE, K., BRENNER, A., MARTIN, J., SHAH, U., PERERA, S., LUCAS, F., BROWN, J. P., KRALJ-HANS, I., GRELIAK, P., PACK, K., WOOD, J., THOMSON, A., VEITCH, A., DUFFY, S. W. & CROSS, A. J. 2017. Adenoma surveillance and colorectal cancer incidence: a retrospective, multicentre, cohort study. *Lancet Oncology*, 18, 823-834.
- CHUNG, S. H., PARK, S. J., CHEON, J. H., PARK, M. S., HONG, S. P., KIM, T. I. & KIM, W. H. 2013. Factors predictive of high-risk adenomas at the third colonoscopy after initial adenoma removal. *Journal of Korean Medical Science*, 28, 1345-50.
- CHUNG, S. J., KIM, Y. S., YANG, S. Y., SONG, J. H., KIM, D., PARK, M. J., KIM, S. G., SONG, I. S. & KIM, J. S. 2011. Five-year risk for advanced colorectal neoplasia after initial colonoscopy according to the baseline risk stratification: a prospective study in 2452 asymptomatic Koreans. *Gut*, 60, 1537-43.
- COLEMAN, H. G., LOUGHREY, M. B., MURRAY, L. J., JOHNSTON, B. T., GAVIN, A. T., SHRUBSOLE, M. J., BHAT, S. K., ALLEN, P. B., MCCONNELL, V. & CANTWELL, M. M. 2015. Colorectal Cancer Risk Following Adenoma Removal: A Large Prospective Population-Based Cohort Study. *Cancer Epidemiology, Biomarkers & Prevention*, 24, 1373-80.
- COTTET, V., JOOSTE, V., FOURNEL, I., BOUVIER, A. M., FAIVRE, J. & BONITHON-KOPP, C. 2012. Long-term risk of colorectal cancer after adenoma removal: a population-based cohort study. *Gut*, 61, 1180-6.
- CUBIELLA, J., CARBALLO, F., PORTILLO, I., CRUZADO QUEVEDO, J., SALAS, D., BINEFA, G., MILA, N., HERNANDEZ, C., ANDREU, M., TERAN, A., ARANA-ARRI, E., ONO, A., VALVERDE, M. J., BUJANDA, L., HERNANDEZ, V., MORILLAS, J. D., JOVER, R. & CASTELLS, A. 2016. Incidence of advanced neoplasia during surveillance in high- and intermediate-risk groups of the European colorectal cancer screening guidelines. *Endoscopy*, 48, 995-1002.
- EMILSSON, L., LOBERG, M., BRETTHAUER, M., HOLME, O., FALL, K., JODAL, H. C., ADAMI, H. O. & KALAGER, M. 2017. Colorectal cancer death after adenoma removal in Scandinavia. *Scandinavian Journal of Gastroenterology*, 52, 1377-1384.
- FACCIORUSSO, A., DI MASO, M., SERVIDDIO, G., VENDEMIALE, G. & MUSCATIELLO, N. 2016. Development and validation of a risk score for advanced colorectal adenoma recurrence after endoscopic resection. *World Journal of Gastroenterology*, 22, 6049-56.
- FACCIORUSSO, A., DI MASO, M., SERVIDDIO, G., VENDEMIALE, G., SPADA, C., COSTAMAGNA, G. & MUSCATIELLO, N. 2016. Factors Associated With Recurrence of Advanced Colorectal Adenoma After Endoscopic Resection. *Clinical Gastroenterology & Hepatology*, 14, 1148-1154.e4.
- FAIRLEY, K. J., LI, J., KOMAR, M., STEIGERWALT, N. & ERLICH, P. 2014. Predicting the risk of recurrent adenoma and incident colorectal cancer based on findings of the baseline colonoscopy. *Clinical and Translational Gastroenterology*, 5, e64.



HUANG, Y., GONG, W., SU, B., ZHI, F., LIU, S., BAI, Y. & JIANG, B. 2010. Recurrence and surveillance of colorectal adenoma after polypectomy in a southern Chinese population. *Journal of Gastroenterology*, 45, 838-45.

HUANG, Y., GONG, W., SU, B., ZHI, F., LIU, S. & JIANG, B. 2012. Risk and cause of interval colorectal cancer after colonoscopic polypectomy. *Digestion*, 86, 148-54.

HUANG, Y., LI, X., WANG, Z. & SU, B. 2012. Five-year risk of colorectal neoplasia after normal baseline colonoscopy in asymptomatic Chinese Mongolian over 50 years of age. *International Journal of Colorectal Disease*, 27, 1651-6.

IMPERIALE, T. F., JULURI, R., SHERER, E. A., GLOWINSKI, E. A., JOHNSON, C. S. & MORELLI, M. S. 2014. A risk index for advanced neoplasia on the second surveillance colonoscopy in patients with previous adenomatous polyps. *Gastrointestinal Endoscopy*, 80, 471-8.

JANG, H. W., PARK, S. J., HONG, S. P., CHEON, J. H., KIM, W. H. & KIM, T. I. 2015. Risk Factors for Recurrent High-Risk Polyps after the Removal of High-Risk Polyps at Initial Colonoscopy. *Yonsei Medical Journal*, 56, 1559-65.

JUNG, Y. S., PARK, D. I., KIM, W. H., EUN, C. S., PARK, S. K., KO, B. M., SEO, G. S., CHA, J. M., PARK, J. J., KIM, K. O., MOON, C. M., JUNG, Y., KIM, E. S., JEON, S. R. & LEE, C. K. 2016. Risk of Advanced Colorectal Neoplasia According to the Number of High-Risk Findings at Index Colonoscopy: A Korean Association for the Study of Intestinal Disease (KASID) Study. *Digestive Diseases & Sciences*, 61, 1661-8.

LAISH, I., SEREGEEV, I., NAFTALI, T. & KONIKOFF, F. M. 2017. Surveillance after positive colonoscopy based on adenoma characteristics. *Digestive & Liver Disease*, 49, 1115-1120.

LAIYEMO, A. O., DOUBENI, C., BADURDEEN, D. S., MURPHY, G., MARCUS, P. M., SCHOEN, R. E., LANZA, E., SMOOT, D. T. & CROSS, A. J. 2012. Obesity, weight change, and risk of adenoma recurrence: a prospective trial. *Endoscopy*, 44, 813-8.

LAIYEMO, A. O., DOUBENI, C., PINSKY, P. F., DORIA-ROSE, V. P., MARCUS, P. M., SCHOEN, R. E., LANZA, E. & CROSS, A. J. 2013. Factors associated with the risk of adenoma recurrence in distal and proximal colon. *Digestion*, 87, 141-6.

LAIYEMO, A. O., DOUBENI, C., SANDERSON, A. K., 2ND, PINSKY, P. F., BADURDEEN, D. S., DORIA-ROSE, V. P., MARCUS, P. M., SCHOEN, R. E., LANZA, E., SCHATZKIN, A. & CROSS, A. J. 2011. Likelihood of missed and recurrent adenomas in the proximal versus the distal colon. *Gastrointestinal Endoscopy*, 74, 253-61.

LAIYEMO, A. O., MURPHY, G., ALBERT, P. S., SANBURY, L. B., WANG, Z., CROSS, A. J., MARCUS, P. M., CAAN, B., MARSHALL, J. R., LANCE, P., PASKETT, E. D., WEISSFELD, J., SLATTERY, M. L., BURT, R., IBER, F., SHIKE, M., KIKENDALL, J. W., LANZA, E. & SCHATZKIN, A. 2008. Postpolypectomy colonoscopy surveillance guidelines: predictive accuracy for advanced adenoma at 4 years. *Annals of Internal Medicine*, 148, 419-26.

LEE, J. L., CHA, J. M., LEE, H. M., JEON, J. W., KWAK, M. S., YOON, J. Y., SHIN, H. P., JOO, K. R., LEE, J. I. & PARK, D. I. 2017. Determining the optimal surveillance interval after a colonoscopic polypectomy for the Korean population? *Intestinal Research*, 15, 109-117.

LEE, T. J., NICKERSON, C., GODDARD, A. F., REES, C. J., MCNALLY, R. J. & RUTTER, M. D. 2013. Outcome of 12-month surveillance colonoscopy in high-risk patients in the National Health Service Bowel Cancer Screening Programme. *Colorectal Disease*, 15, e435-42.



LEUNG, K., PINSKY, P., LAIYEMO, A. O., LANZA, E., SCHATZKIN, A. & SCHOEN, R. E. 2010. Ongoing colorectal cancer risk despite surveillance colonoscopy: the Polyp Prevention Trial Continued Follow-up Study. *Gastrointestinal Endoscopy*, 71, 111-7.

LOBERG, M., KALAGER, M., HOLME, O., HOFF, G., ADAMI, H. O. & BRETTHAUER, M. 2014. Long-term colorectal-cancer mortality after adenoma removal. *New England Journal of Medicine*, 371, 799-807.

MARTINEZ, M. E., BARON, J. A., LIEBERMAN, D. A., SCHATZKIN, A., LANZA, E., WINAWER, S. J., ZAUBER, A. G., JIANG, R., AHNEN, D. J., BOND, J. H., CHURCH, T. R., ROBERTSON, D. J., SMITH-WARNER, S. A., JACOBS, E. T., ALBERTS, D. S. & GREENBERG, E. R. 2009. A pooled analysis of advanced colorectal neoplasia diagnoses after colonoscopic polypectomy. *Gastroenterology*, 136, 832-41.

MILLER, J., MEHTA, N., FELDMAN, M., FURTH, E., GINSBERG, G. G., YANG, Y. X. & LEWIS, J. D. 2010. Findings on serial surveillance colonoscopy in patients with low-risk polyps on initial colonoscopy. *Journal of Clinical Gastroenterology*, 44, e46-50.

MORELLI, M. S., GLOWINSKI, E. A., JULURI, R., JOHNSON, C. S. & IMPERIALE, T. F. 2013. Yield of the second surveillance colonoscopy based on the results of the index and first surveillance colonoscopies. *Endoscopy*, 45, 821-6.

NATIONAL INSTITUTE FOR HEALTH AND CARE EXCELLENCE. Developing NICE guidelines: the manual. London. National Institute for Health and Care Excellence, 2014. Available from: <http://www.nice.org.uk/article/PMG20/chapter/1%20Introduction%20and%20overview>

NUSKO, G., HAHN, E. G. & MANSMANN, U. 2008. Risk of advanced metachronous colorectal adenoma during long-term follow-up. *International Journal of Colorectal Disease*, 23, 1065-71.

PARK, S. K., KIM, N. H., JUNG, Y. S., KIM, W. H., EUN, C. S., KO, B. M., SEO, G. S., CHA, J. M., PARK, J. J., KIM, K. O., MOON, C. M., JUNG, Y., KIM, E. S., JEON, S. R., LEE, C. K., PARK, D. I. & INTESTINAL CANCER STUDY GROUP OF KOREAN ASSOCIATION FOR STUDY OF INTESTINAL, D. 2016. Risk of developing advanced colorectal neoplasia after removing high-risk adenoma detected at index colonoscopy in young patients: A KASID study. *Journal of Gastroenterology & Hepatology*, 31, 138-44.

PINSKY, P. F., SCHOEN, R. E., WEISSFELD, J. L., CHURCH, T., YOKOCHI, L. A., DORIA-ROSE, V. P. & PROROK, P. 2009. The yield of surveillance colonoscopy by adenoma history and time to examination. *Clinical Gastroenterology & Hepatology*, 7, 86-92.

PRISMA. Preferred Reporting Items for Systematic Reviews and Meta-analyses (PRISMA) Statement. 2009. <http://www.prisma-statement.org/index.htm>

SOLAKOGLU, T., KOSEOGLU, H., OZER SARI, S., AKIN, F. E., DEMIREZER BOLAT, A., TAYFUR YUREKLI, O., BUYUKASIK, N. S. & ERSOY, O. 2017. Role of baseline adenoma characteristics for adenoma recurrence in patients with high-risk adenoma. *Turkish Journal of Medical Sciences*, 47, 1416-1424.

TAE, C. H., MOON, C. M., JUNG, S. A., EUN, C. S., PARK, J. J., SEO, G. S., CHA, J. M., PARK, S. C., CHUN, J., LEE, H. J., JUNG, Y., KIM, J. O., JOO, Y. E., BOO, S. J. & IL PARK, D. 2017. Higher body mass index is associated with an increased risk of multiplicity in surveillance colonoscopy within 5 years. *Scientific Reports*, 7, 14239.

VAN ENCKEVORT, C. C., DE GRAAF, A. P., HOLLEMA, H., SLUITER, W. J., KLEIBEUKER, J. H. & KOORNSTRA, J. J. 2014. Predictors of colorectal neoplasia after polypectomy: based on initial and consecutive findings. *Netherlands Journal of Medicine*, 72, 139-45.



VAN HEIJNINGEN, E. M., LANSDORP-VOGELAAR, I., KUIPERS, E. J., DEKKER, E., LESTERHUIS, W., TER BORG, F., VECHT, J., DE JONGE, V., SPOELSTRA, P., ENGELS, L., BOLWERK, C. J., TIMMER, R., KLEIBEUKER, J. H., KOORNSTRA, J. J., VAN BALLEGOOIJEN, M. & STEYERBERG, E. W. 2013. Features of adenoma and colonoscopy associated with recurrent colorectal neoplasia based on a large community-based study. *Gastroenterology*, 144, 1410-8.

VEMULAPALLI, K. C. & REX, D. K. 2014. Risk of advanced lesions at first follow-up colonoscopy in high-risk groups as defined by the United Kingdom post-polypectomy surveillance guideline: data from a single U.S. center. *Gastrointestinal Endoscopy*, 80, 299-306.

WINAWER, S. J., ZAUBER, A. G., HO, M. N., O'BRIEN, M. J., GOTTLIEB, L. S., STERNBERG, S. S., WAYE, J. D., SCHAPIRO, M., BOND, J. H., PANISH, J. F., ACKROYD, F., SHIKE, M., KURTZ, R. C., HORNSBY-LEWIS, L., GERDES, H. & STEWART, E. T. 1993. Prevention of Colorectal Cancer by Colonoscopic Polypectomy. *New England Journal of Medicine*, 329, 1977-1981.

WINAWER, S. J., ZAUBER, A. G., O'BRIEN, M. J., HO, M. N., GOTTLIEB, L., STERNBERG, S. S., WAYE, J. D., BOND, J., SCHAPIRO, M., STEWART, E. T., PANISH, J., ACKROYD, F., KURTZ, R. C. & SHIKE, M. 1993. Randomized Comparison of Surveillance Intervals after Colonoscopic Removal of Newly Diagnosed Adenomatous Polyps. *New England Journal of Medicine*, 328, 901-906.







## Appendix 1

Table 1.1. Additional questions SchARR was asked to synthesise the evidence for.

|      |                            |                                                                                                                 |                                                                                                                                                                                                                                                                                                                                                  |                                                       |                                                                                              |                                                                                                                                                                                                                                                     |
|------|----------------------------|-----------------------------------------------------------------------------------------------------------------|--------------------------------------------------------------------------------------------------------------------------------------------------------------------------------------------------------------------------------------------------------------------------------------------------------------------------------------------------|-------------------------------------------------------|----------------------------------------------------------------------------------------------|-----------------------------------------------------------------------------------------------------------------------------------------------------------------------------------------------------------------------------------------------------|
| CQ8  | Stop surveillance criteria | At what age can surveillance be stopped without increasing the risk of CRC development?                         | Adults >75 years (or other older age cohort) who have been diagnosed with at least one colorectal adenoma and all detected adenomas have been resected completely at baseline; and adults >75 years (or other older age cohort) who have undergone potentially curative treatment for primary CRC and have had a baseline clearance colonoscopy. | endoscopic surveillance                               | No surveillance                                                                              | Subsequent CRC incidence, CRC mortality, all cause mortality                                                                                                                                                                                        |
| CQ9  | Stop surveillance criteria | At what estimate of life expectancy can surveillance be stopped without increasing the risk of CRC development? | Adults age >65 who have a life expectancy at 5 years of <60% (e.g. By Schonberg Index)                                                                                                                                                                                                                                                           | endoscopic surveillance                               | No surveillance                                                                              | Subsequent CRC incidence, CRC mortality, all cause mortality                                                                                                                                                                                        |
| CQ10 | Stop surveillance criteria | What is the risk of colonoscopy in adults >75 years (or other older age cohort)                                 | Adults >75 who have undergone colonoscopy for any indication                                                                                                                                                                                                                                                                                     | colonoscopy                                           | No colonoscopy                                                                               | Subsequent mortality or significant morbidity                                                                                                                                                                                                       |
| CQ11 | Stop surveillance criteria | When (and in whom) can surveillance be stopped, relating to colonoscopy findings?                               | No PICO                                                                                                                                                                                                                                                                                                                                          |                                                       |                                                                                              |                                                                                                                                                                                                                                                     |
| CQ16 | Quality of procedure       | Does a high quality colonoscopy have a significant impact on findings (outcomes) at surveillance colonoscopy    | Adults undergoing colonoscopy                                                                                                                                                                                                                                                                                                                    | High quality colonoscopy ()<br><b>see excel sheet</b> | "Standard colonoscopy" (minimum standard) and low quality colonoscopy <b>see excel sheet</b> | Advanced adenoma incidence at next surveillance (diameter $\geq 10$ mm or HGD or villous component $\geq 25\%$ ); CRC incidence at next surveillance (includes interval CRCs as well if reported); Long-term CRC incidence; Long-term CRC mortality |



**CQ8****Statement/question**

Q8: At what age can surveillance be stopped without increasing the risk of CRC development?

S: There is no evidence on which to make an assessment of what age can surveillance be stopped without increasing the risk of CRC development

**PICO table**

**P:** Adults >75 years (or other older age cohort) who have been diagnosed with at least one colorectal adenoma and all detected adenomas have been resected completely at baseline; and adults >75 years (or other older age cohort) who have undergone potentially curative treatment for primary CRC and have had a baseline clearance colonoscopy.

**I:** endoscopic surveillance

**C:** no surveillance

**O:** Subsequent CRC incidence, CRC mortality, all cause mortality

**Results**Results of the bibliographic searches

After removing duplicates, 5334 articles were found. 198 were considered potentially relevant and acquired in full text. (See flow chart).

Excluded studies

198 studies were excluded because they did not meet the inclusion criteria.

Included studies

No studies were included.



PRISMA Flow Diagram

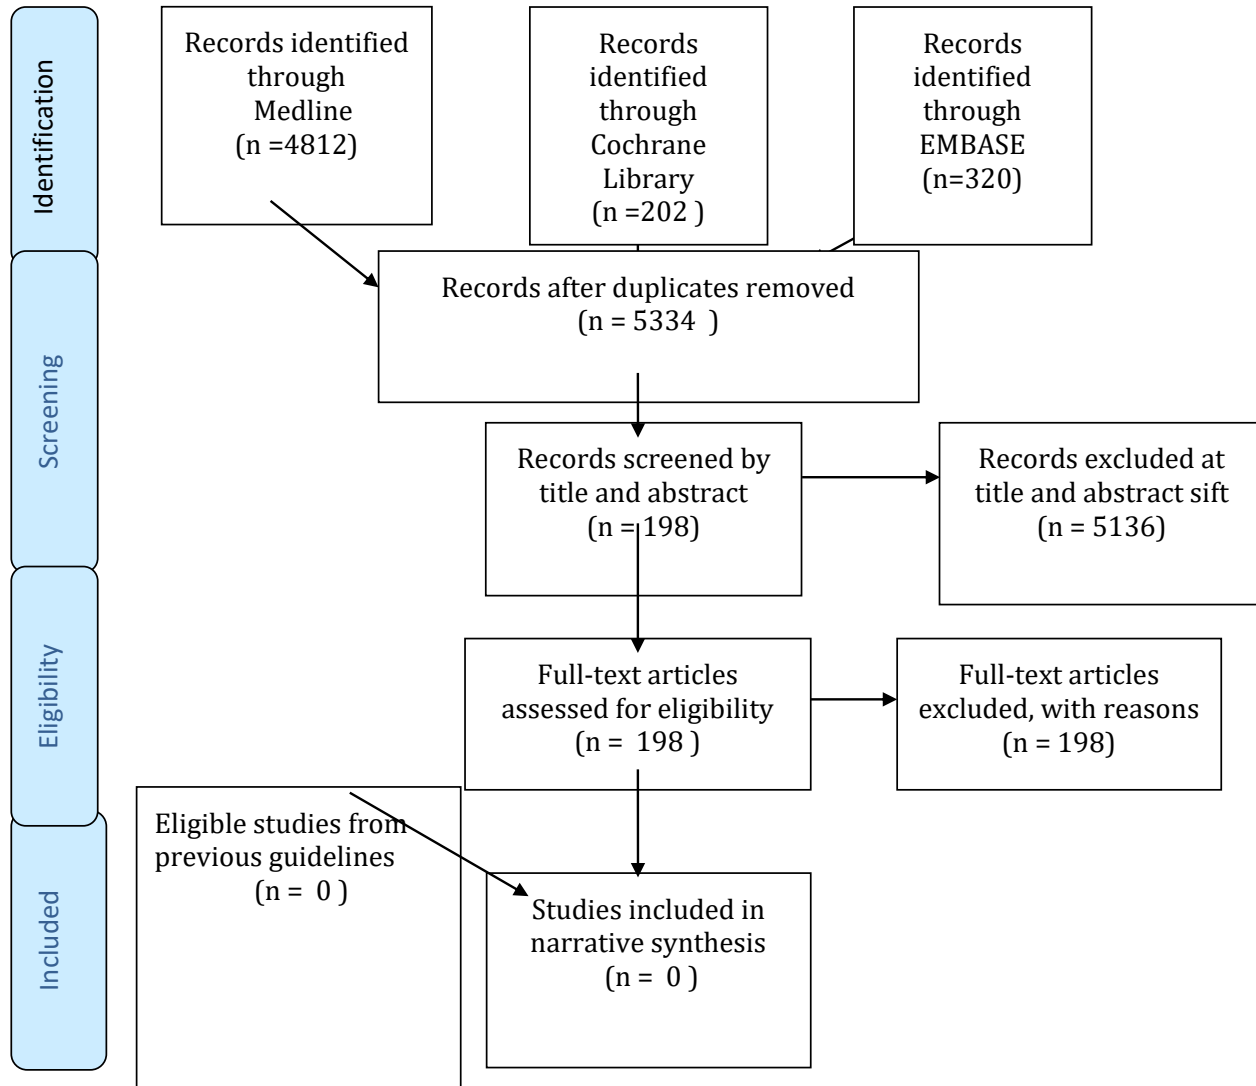

**CQ9****Statement/question**

Q9: At what estimate of life expectancy can surveillance be stopped without increasing the risk of CRC development?

S: There is no evidence on which to make an assessment of what estimate of life expectancy can surveillance be stopped without increasing the risk of CRC development

**PICO table**

**P:** Adults age >65 who have a life expectancy at 5 years of <60% (e.g. By Schonberg Index)

**I:** endoscopic surveillance

**C:** No surveillance

**O:** Subsequent CRC incidence, CRC mortality, all cause mortality

**Results**Results of the bibliographic searches

After removing duplicates, 5334 articles were found. No systematic reviews were found as potentially relevant. 198 were considered potentially relevant and acquired in full text. (See flow chart).

Excluded studies

198 studies (refs) were excluded because they did not meet the inclusion criteria.

Included studies

No studies were included.



PRISMA Flow Diagram

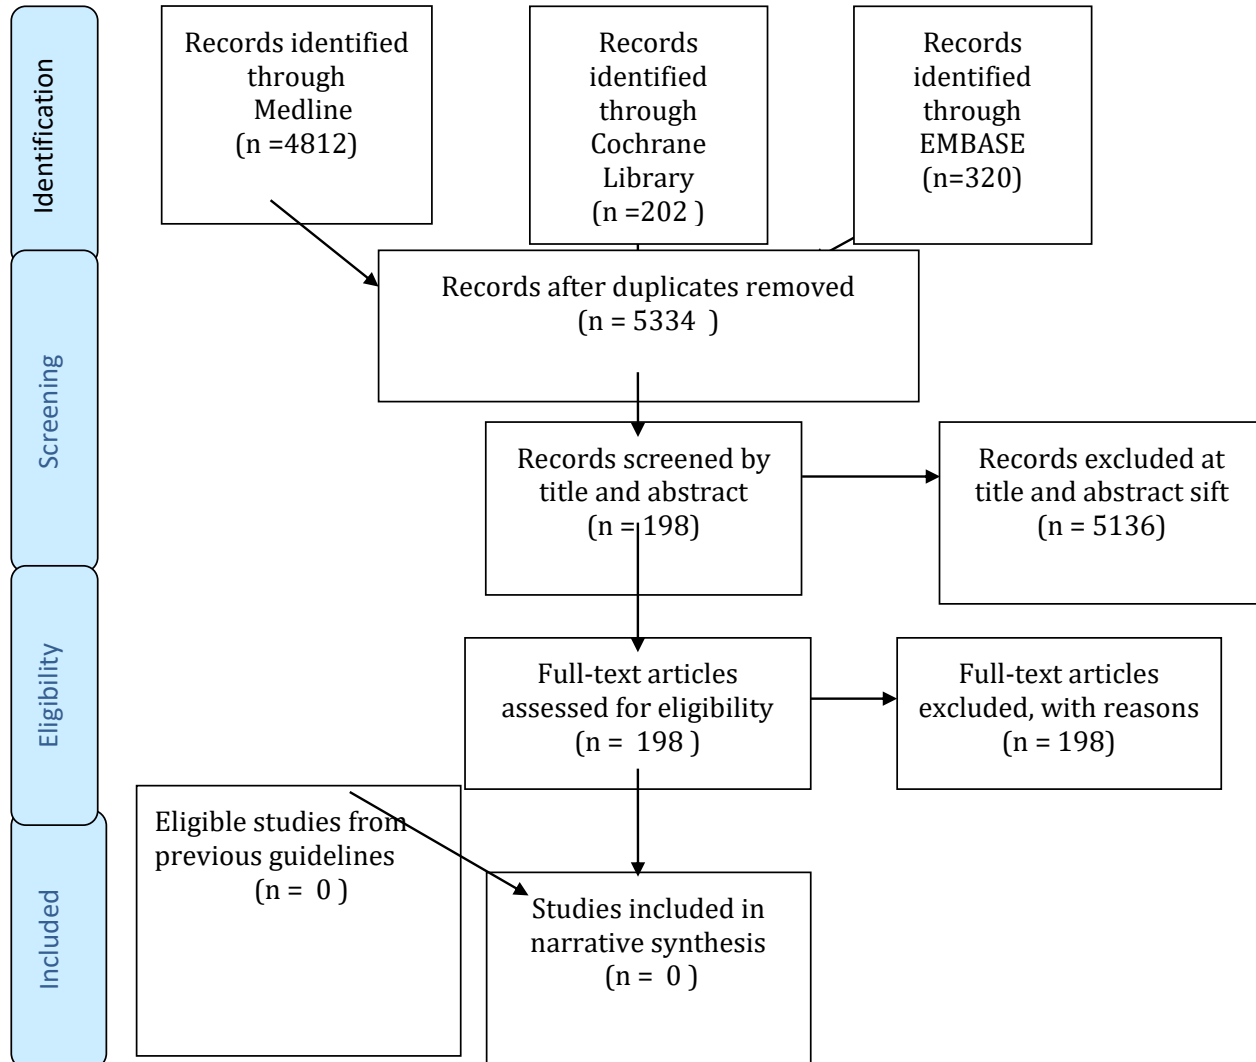

**CQ10****Statement/question**

Q10: What is the risk of colonoscopy in adults >75 years (or other older age cohort)?

S: Use of colonoscopy in elderly patients reduces the risk of CRC but is associated with adverse gastrointestinal events.

**PICO table**

**P:** Adults >75 who have undergone colonoscopy for any indication

**I:** Colonoscopy

**C:** No colonoscopy

**O:** Subsequent mortality or significant morbidity

**Results**Results of the bibliographic searches

After removing duplicates, 5334 articles were found. No systematic reviews were found as potentially relevant. 198 were considered potentially relevant and acquired in full text. (See flow chart).

Excluded studies

195 studies were excluded because they did not meet the inclusion criteria.

Included studies

3 studies were included at full text (Wang et al., 2016; Garcia-Albeniz et al., 2017; Warren et al., 2009).

**Evidence based discussion text****What is the risk of colonoscopy in adults >75 years (or other older age cohort)? (compared to no colonoscopy)**

Three studies were identified comparing patients in older age cohorts who had undergone colonoscopy screening with those who had not. Two studies assessed incidence of colorectal cancer in elderly patients comparing those who had had colonoscopy compared to those that had not (Wang et al., 2016; Garcia-Albeniz et al., 2017). Wang et al (2016) reported significantly fewer CRCs were diagnosed in the colonoscopy group. 379 (1.55%) CRCs diagnosed in the control group, 37 (0.65%) diagnosed in the colonoscopy group ( $p < 0.001$ ). This finding remained for distal and proximal CRCs with significantly fewer distal CRCs in the colonoscopy group (175 (0.72%) control group, 12 (0.21%) in the colonoscopy group ( $p < 0.001$ )), and significantly fewer proximal CRCs in the colonoscopy group (187 (0.77%) control group, 25 (0.44%) in the colonoscopy group ( $p < 0.01$ )). Compared with the control group, the cumulative incidence of CRC was significantly lower in the colonoscopy group. Subgroup analyses by CRC location showed a similar reduction in the cumulative incidence of both distal CRC ( $p < 0.001$ ) and proximal CRC ( $p < 0.05$ ) in the colonoscopy group (5-year distal CRC: 0.26 vs 0.77%; 5 year proximal CRC: 0.43 vs 0.79%, both  $p < 0.05$ .) Compared with the control group, colonoscopy was associated with a lower risk of all CRC (HR 0.42, 95% CI 0.28-0.65,  $p < 0.001$ ), distal CRC (HR 0.36, 95% CI 0.18-0.70,  $p < 0.01$ ), and proximal CRC (HR 0.53, 95% CI 0.30-0.92,  $p < 0.05$ ). Garcia-Albeniz et al reported a modest benefit of screening colonoscopy for the prevention of CRC in people aged 70-74 years, and a smaller benefit in those aged 75-79 with the standardized 8-year risk of CRC (95% CI) 2.84% (2.54, 3.13) in the colonoscopy screening arm and 2.97% (2.92, 3.03) in the no screening arm; risk difference -0.14% (-0.41, 0.16). Whilst the risk of adverse events was low, it was greater for older individuals.

Warren et al reported that risk for adverse events among persons undergoing colonoscopy increased with age. Relative to persons age 66 to 69 years, the adjusted predictive risk for adverse gastrointestinal events was significantly higher for patients age 80 years or older (risk per 1000 procedures in persons 80 to 84 years of age vs. those 66 to 69 years of age: 8.8 [CI, 6.9 to 10.7] vs. 5.0 [CI, 3.8 to 6.2] for serious gastrointestinal events and 15.9 [CI, 13.5 to 18.3] vs. 6.9 [CI, 5.6 to 8.2] for other gastrointestinal events). Persons in the colonoscopy group were significantly more likely



than their age-equivalent matched group to have adverse gastrointestinal events. The risk for adverse cardiovascular events increased with age among persons undergoing colonoscopy, but these rates did not significantly differ from those in the age-equivalent matched group.

In conclusion: Elderly patients who had colonoscopy screening appeared to have a lower risk for CRC, but were more likely to have adverse gastrointestinal events compared to those who did not. The risk for adverse gastrointestinal events in the colonoscopy group increases with age, and is significantly higher patients 80 years or older compared to those 66 to 69 years.

- GARCIA-ALBENIZ, X., HSU, J., BRETTHAUER, M. & HERNAN, M. A. 2017. Effectiveness of Screening Colonoscopy to Prevent Colorectal Cancer Among Medicare Beneficiaries Aged 70 to 79 Years: A Prospective Observational Study. *Annals of Internal Medicine*, 166, 18-26.
- WANG, Y. R., CANGEMI, J. R., LOFTUS, E. V., JR. & PICCO, M. F. 2016. Decreased Risk of Colorectal Cancer after Colonoscopy in Patients 76-85 Years Old in the United States. *Digestion*, 93, 132-8.
- WARREN, J. L., KLABUNDE, C. N., MARIOTTO, A. B., MEEKINS, A., TOPOR, M., BROWN, M. L. & RANSOHOFF, D. F. 2009. Adverse events after outpatient colonoscopy in the Medicare population. *Annals of Internal Medicine*, 150, 849-57, W152.





| Author, publication year | Study Objective                                                                                                                                                     | Participants/ Setting                                                                                                                                                                                                               | Intervention                                                                                                                                    | Outcome                                                                                                                                                   | Comparisons                               | Results                                                                                                                                                                                                                                                                                                                                                                                                                                                                                                                                                                                                                         | Conclusion                                                                                                                                                                                                                               |
|--------------------------|---------------------------------------------------------------------------------------------------------------------------------------------------------------------|-------------------------------------------------------------------------------------------------------------------------------------------------------------------------------------------------------------------------------------|-------------------------------------------------------------------------------------------------------------------------------------------------|-----------------------------------------------------------------------------------------------------------------------------------------------------------|-------------------------------------------|---------------------------------------------------------------------------------------------------------------------------------------------------------------------------------------------------------------------------------------------------------------------------------------------------------------------------------------------------------------------------------------------------------------------------------------------------------------------------------------------------------------------------------------------------------------------------------------------------------------------------------|------------------------------------------------------------------------------------------------------------------------------------------------------------------------------------------------------------------------------------------|
| Garcia Albeniz 2017      | Population based prospective study. To evaluate the effectiveness and safety of screening colonoscopy to prevent cancer in individuals aged 70-74 and 75-79.        | Individuals aged 70–79 without history of prior colorectal cancer who, in the five years before baseline, no history of adenoma, inflammatory bowel disease or colectomy, had not received a colonoscopy, sigmoidoscopy or FOBT.    | Observational data used to emulate a target trial with 2 arms: colonoscopy screening and no screening. Using the SEER-medicare linked database. | Primary outcome was CRC incidence. Secondary, adverse events                                                                                              | Colonoscopy screening versus no screening | 70–74 age group, the standardized 8-year risk of CRC (95% CI) was 2.19% (2.00, 2.37) in the colonoscopy screening arm and 2.62% (2.56, 2.67) in the no screening arm; risk difference -0.42% (-0.24, -0.63).<br><br>75–79 age group, the standardized 8-year risk of CRC (95% CI) was 2.84% (2.54, 3.13) in the colonoscopy screening arm and 2.97% (2.92, 3.03) in the no screening arm; risk difference -0.14% (-0.41, 0.16).                                                                                                                                                                                                 | The findings suggest a modest benefit of screening colonoscopy for the prevention of CRC in people aged 70-74 years, and a smaller benefit in older people. The risk of adverse events was low, but greater for older individuals.       |
| Wang 2016                | Population based retrospective cohort study. To evaluate whether colonoscopy use is associated with reduced risk of both distal and proximal CRC in this age group. | The colonoscopy group included patients 75-86 years old who were free of cancer on the date of their out patient colonoscopy. Control group included all patients aged 76-85, were not in the study group, and did not have cancer. | SEER-Medicare linked database was used to provide data on both groups.                                                                          | CRC incidence                                                                                                                                             | NA                                        | Compared with the control group, colonoscopy was associated with a lower risk of all CRC.                                                                                                                                                                                                                                                                                                                                                                                                                                                                                                                                       | Among elderly patients (76-85 years old) risks of both distal and proximal CRC decreased after colonoscopy. Screening colonoscopy could be considered for healthy elderly patients with no major comorbidities and long life expectancy. |
| Warren 2009              | Population based matched cohort study. To determine risk for adverse events after outpatient colonoscopy in elderly patients.                                       | Persons age 66 to 95 years at the time of their procedure, who had two or fewer colonoscopies during the study period.                                                                                                              | SEER-Medicare linked database was used to provide data on both groups.                                                                          | Adverse events occurring within 30 days after outpatient colonoscopy that were severe enough to require an emergency department visit or hospitalization. | NA                                        | Risk for an adverse event increased with age. Persons undergoing colonoscopy at age 75 years or older were at increased risk for other gastrointestinal adverse events. The risk for serious gastrointestinal adverse events was 75% higher for persons age 80 to 84 years compared with persons age 66 to 69 years. Although the risk for adverse cardiovascular events increased with age among persons undergoing colonoscopy, the rate of events in the colonoscopy group did not significantly differ from that in the age-equivalent matched group, suggesting that the events were more related to age than colonoscopy. | The risk for adverse events after outpatient colonoscopy among elderly patients is strongly related to the type of procedure performed, patient age, and comorbid conditions.                                                            |



PRISMA Flow Diagram

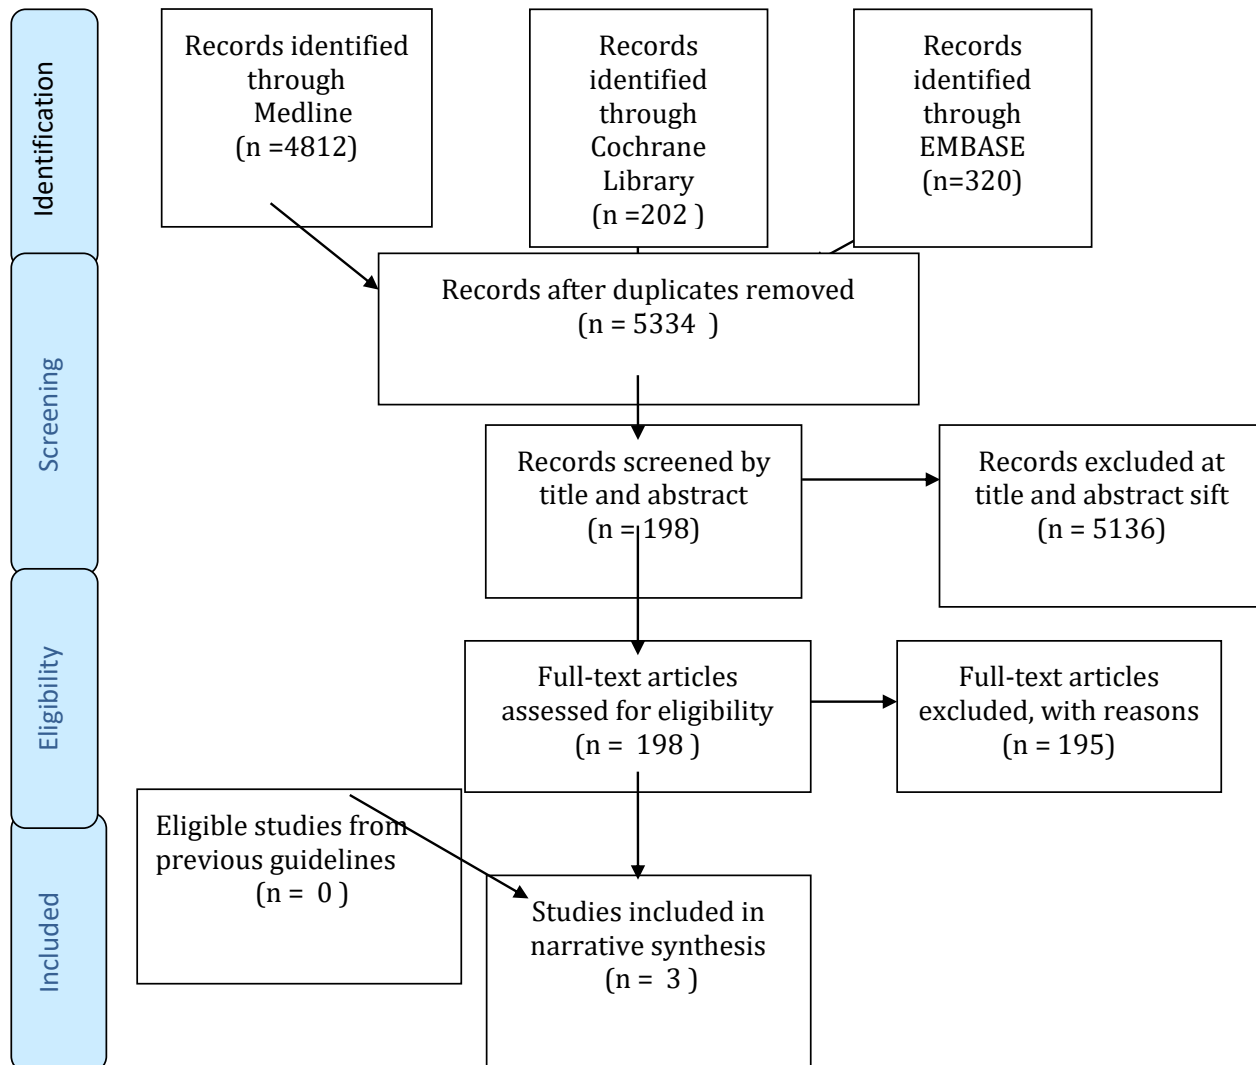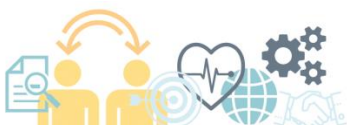

**Statement/question**

Q16: Does a high quality colonoscopy have a significant impact on findings (outcomes) at surveillance colonoscopy?

**PICO table**

**P:** Adults undergoing colonoscopy

**I:** High quality colonoscopy

**C:** "Standard colonoscopy" (minimum standard) and low quality colonoscopy

**O:** Advanced adenoma incidence at next surveillance (diameter  $\geq 10$ mm or HGD or villous component  $\geq 25\%$ ); CRC incidence at next surveillance (includes interval CRCs as well if reported); Long-term CRC incidence; Long-term CRC mortality

**Results**Results of the bibliographic searches

After removing duplicates, 5334 articles were found. No systematic reviews were found as potentially relevant. 198 were considered potentially relevant and acquired in full text. (See flow chart).

Excluded studies

198 studies (refs) were excluded because they did not meet the inclusion criteria.

Included studies

No studies were included at full text.

STATEMENT: There is no evidence on which to make an assessment of whether a high quality colonoscopy has a significant impact on findings at surveillance colonoscopy.

Evaluative text: There is no evidence on which to make an assessment of whether a high quality colonoscopy has a significant impact on findings at surveillance colonoscopy.



PRISMA Flow Diagram

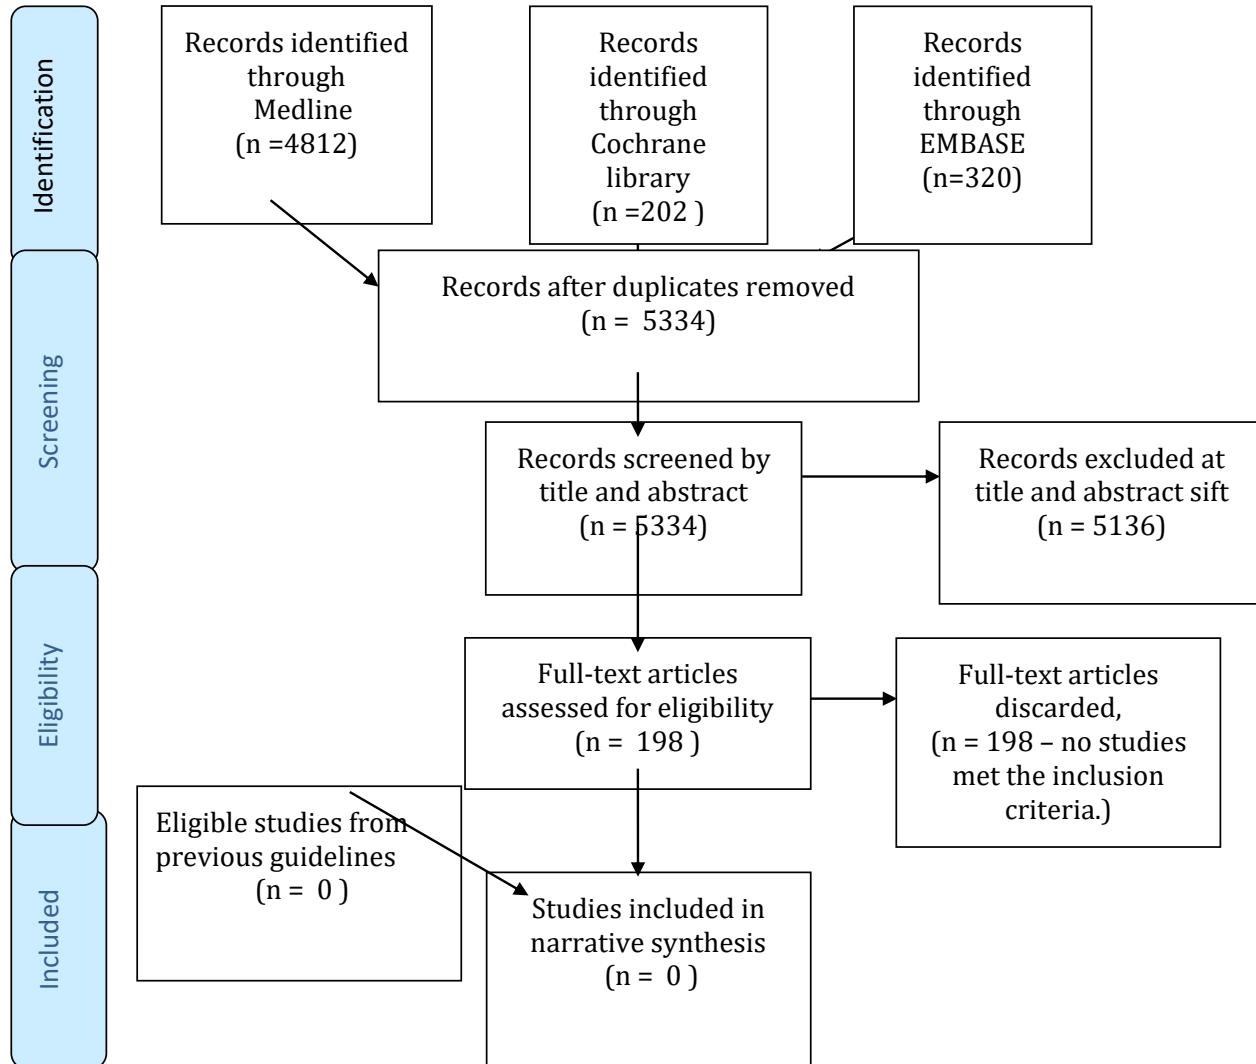

## Appendix 2

**Table 2.1. Search terms for CQ1 – Q16**

### Medline search terms

26<sup>th</sup> January 2018

| #  | Searches                                                                                                                                                |
|----|---------------------------------------------------------------------------------------------------------------------------------------------------------|
| 1  | exp *Colorectal Neoplasms/                                                                                                                              |
| 2  | ((colorect* or colo rect* or colon or bowel* or intestine*) adj3 (cancer* or neoplas* or oncolog* or malignan* or tumo?r* or carcinoma* or adeno*)).tw. |
| 3  | *Adenoma/                                                                                                                                               |
| 4  | (adenoma* or neoplasia).tw.                                                                                                                             |
| 5  | *Intestinal Polyps/                                                                                                                                     |
| 6  | (polyp* or postpolyp* or lesion*).tw.                                                                                                                   |
| 7  | *Colonoscopy/                                                                                                                                           |
| 8  | (colonoscop* or postcolonoscop*).tw.                                                                                                                    |
| 9  | (surveillance or ((screening or rescreening) adj2 colonoscop*)).tw.                                                                                     |
| 10 | 1 or 2                                                                                                                                                  |
| 11 | or/3-6                                                                                                                                                  |
| 12 | or/7-9                                                                                                                                                  |
| 13 | 10 and 11 and 12                                                                                                                                        |
| 14 | exp *Incidence/                                                                                                                                         |
| 15 | exp *Prevalence/                                                                                                                                        |
| 16 | incidence.tw.                                                                                                                                           |
| 17 | prevalence.tw.                                                                                                                                          |
| 18 | *Risk/                                                                                                                                                  |
| 19 | risk.tw.                                                                                                                                                |
| 20 | or/14-19                                                                                                                                                |
| 21 | 13 and 20                                                                                                                                               |
| 22 | (1 or 2) and (3 or 4 or 5 or 6)                                                                                                                         |
| 23 | 7 or 8                                                                                                                                                  |
| 24 | (22 or 23) and 9                                                                                                                                        |
| 25 | 21 or 24                                                                                                                                                |
| 26 | limit 25 to (english language and yr="2007 -Current")                                                                                                   |
| 27 | letter/                                                                                                                                                 |
| 28 | editorial/                                                                                                                                              |
| 29 | news/                                                                                                                                                   |
| 30 | exp historical article/                                                                                                                                 |
| 31 | anecdotes as topic/                                                                                                                                     |
| 32 | comment/                                                                                                                                                |
| 33 | case report/                                                                                                                                            |
| 34 | (letter or comment*).ti.                                                                                                                                |
| 35 | or/27-34                                                                                                                                                |
| 36 | randomized controlled trial/ or random*.ti,ab.                                                                                                          |



|    |                                    |
|----|------------------------------------|
| 37 | 35 not 36                          |
| 38 | animals/ not humans/               |
| 39 | exp animals, laboratory/           |
| 40 | exp animal experimentation/        |
| 41 | exp models, animal/                |
| 42 | exp rodentia/                      |
| 43 | (rat or rats or mouse or mice).ti. |
| 44 | or/37-43                           |
| 45 | 26 not 44                          |

**Embase search terms**26<sup>th</sup> January 2018

| #  | Searches                                                                                                                                                |
|----|---------------------------------------------------------------------------------------------------------------------------------------------------------|
| 1  | exp *colorectal tumor/                                                                                                                                  |
| 2  | ((colorect* or colo rect* or colon or bowel* or intestine*) adj3 (cancer* or neoplas* or oncolog* or malignan* or tumo?r* or carcinoma* or adeno*)).tw. |
| 3  | *adenoma/                                                                                                                                               |
| 4  | (adenoma* or neoplasia).tw.                                                                                                                             |
| 5  | *intestine polyp/                                                                                                                                       |
| 6  | (polyp* or postpolyp* or lesion*).tw.                                                                                                                   |
| 7  | *colonoscopy/                                                                                                                                           |
| 8  | (colonoscop* or postcolonoscop*).tw.                                                                                                                    |
| 9  | (surveillance or ((screening or rescreening) adj2 colonoscop*)).tw.                                                                                     |
| 10 | 1 or 2                                                                                                                                                  |
| 11 | or/3-6                                                                                                                                                  |
| 12 | or/7-9                                                                                                                                                  |
| 13 | 10 and 11 and 12                                                                                                                                        |
| 14 | exp *incidence/                                                                                                                                         |
| 15 | exp *prevalence/                                                                                                                                        |
| 16 | incidence.tw.                                                                                                                                           |
| 17 | prevalence.tw.                                                                                                                                          |
| 18 | *risk/                                                                                                                                                  |
| 19 | risk.tw.                                                                                                                                                |
| 20 | or/14-19                                                                                                                                                |
| 21 | 13 and 20                                                                                                                                               |
| 22 | (1 or 2) and (3 or 4 or 5 or 6)                                                                                                                         |
| 23 | 7 or 8                                                                                                                                                  |
| 24 | (22 or 23) and 9                                                                                                                                        |
| 25 | 21 or 24                                                                                                                                                |
| 26 | limit 25 to (english language and yr="2007 -Current")                                                                                                   |
| 27 | letter.pt. or letter/                                                                                                                                   |
| 28 | note.pt.                                                                                                                                                |
| 29 | editorial.pt.                                                                                                                                           |
| 30 | case report/ or case study/                                                                                                                             |
| 31 | (letter or comment*).ti.                                                                                                                                |

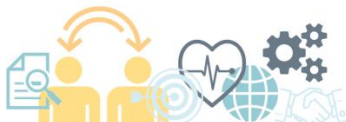

|    |                                                |
|----|------------------------------------------------|
| 32 | or/27-31                                       |
| 33 | randomized controlled trial/ or random*.ti,ab. |
| 34 | 32 not 33                                      |
| 35 | animal/ not human/                             |
| 36 | nonhuman/                                      |
| 37 | exp animal experiment/                         |
| 38 | exp experimental animal/                       |
| 39 | animal model/                                  |
| 40 | exp rodent/                                    |
| 41 | (rat or rats or mouse or mice).ti.             |
| 42 | or/34-41                                       |
| 43 | 26 not 42                                      |
| 44 | limit 43 to conference abstract status         |
| 45 | 43 not 44                                      |

### Cochrane search terms

26<sup>th</sup> January 2018

| #   | Searches                                                                                                                                                    |
|-----|-------------------------------------------------------------------------------------------------------------------------------------------------------------|
| #1  | MeSH descriptor: [Colorectal Neoplasms] explode all trees                                                                                                   |
| #2  | ((colorect* or colo rect* or colon or bowel* or intestine*) near/3 (cancer* or neoplas* or oncolog* or malignan* or tumo*r* or carcinoma* or adeno*)):ti,ab |
| #3  | MeSH descriptor: [Adenoma] explode all trees                                                                                                                |
| #4  | (adenoma* or neoplasia):ti,ab                                                                                                                               |
| #5  | MeSH descriptor: [Intestinal Polyps] explode all trees                                                                                                      |
| #6  | (polyp* or postpolyp* or lesion*):ti,ab                                                                                                                     |
| #7  | MeSH descriptor: [Colonoscopy] explode all trees                                                                                                            |
| #8  | (colonoscop* or postcolonoscop*):ti,ab                                                                                                                      |
| #9  | (surveillance or ((screening or rescreening) near/2 colonoscop*)):ti,ab                                                                                     |
| #10 | #1 or #2                                                                                                                                                    |
| #11 | {or #3-#6}                                                                                                                                                  |
| #12 | {or #7-#9}                                                                                                                                                  |
| #13 | #10 and #11 and #12                                                                                                                                         |
| #14 | MeSH descriptor: [Incidence] this term only                                                                                                                 |
| #15 | MeSH descriptor: [Prevalence] this term only                                                                                                                |
| #16 | incidence:ti,ab                                                                                                                                             |
| #17 | prevalence:ti,ab                                                                                                                                            |
| #18 | MeSH descriptor: [Risk] this term only                                                                                                                      |
| #19 | risk:ti,ab                                                                                                                                                  |
| #20 | {or #14-#19}                                                                                                                                                |
| #21 | #13 and #20                                                                                                                                                 |
| #22 | surveillance:ti,ab                                                                                                                                          |
| #23 | (#1 or #2) and (#3 or #4 or #5 or #6)                                                                                                                       |
| #24 | #7 or #8                                                                                                                                                    |
| #25 | (#23 or #24) and #22                                                                                                                                        |
| #26 | #21 or #25 Publication Year from 2007                                                                                                                       |



### Appendix 3

**Table 3.1. List of studies excluded at full text sift.**

| Reference                                                                                                                                                                                                                                                                                                                                                            | Reason                                                      |
|----------------------------------------------------------------------------------------------------------------------------------------------------------------------------------------------------------------------------------------------------------------------------------------------------------------------------------------------------------------------|-------------------------------------------------------------|
| ADLER, S. N. 2012. Beat colon cancer mortality? Yes we can! <i>Annals of Gastroenterology</i> , 25, 368.                                                                                                                                                                                                                                                             | Opinion                                                     |
| ANDERSON, J., MOTT, L., COLE, B., BARON, J. & ROBERTSON, D. 2015. Surveillance of low risk adenomas at 3 versus 5 year intervals: data to support current surveillance guidelines. <i>Gastroenterology</i> . [Online], 148. Available: <a href="http://onlinelibrary.wiley.com/doi/10.1111/gastro.12811">http://onlinelibrary.wiley.com/doi/10.1111/gastro.12811</a> | Abstract only                                               |
| ANONYMOUS 2014. Millions of data from screening colonoscopy evaluated. <i>Best Practice Onkologie</i> , 9, 4.                                                                                                                                                                                                                                                        | Non English Language                                        |
| ATES, O., SIVRI, B. & KILICKAP, S. 2017. Evaluation of risk factors for the recurrence of colorectal polyps and colorectal cancer. <i>Turkish Journal of Medical Sciences</i> , 47, 1370-1376.                                                                                                                                                                       | Patients with CRC at baseline not separated in the analysis |
| BAIK, S. J., PARK, H., PARK, J. J., LEE, H. J., JO, S. Y., PARK, Y. M. & LEE, H. S. 2017. Advanced Colonic Neoplasia at Follow-up Colonoscopy According to Risk Components and Adenoma Location at Index Colonoscopy: A Retrospective Study of 1,974 Asymptomatic Koreans. <i>Gut &amp; Liver</i> , 11, 667-673.                                                     | No relevant outcome measures                                |
| BAXTER, N. N., WARREN, J. L., BARRETT, M. J., STUKEL, T. A. & DORIA-ROSE, V. P. 2012. Association between colonoscopy and colorectal cancer mortality in a US cohort according to site of cancer and colonoscopist specialty. <i>Journal of Clinical Oncology</i> , 30, 2664-9.                                                                                      | Not about risk of colonoscopy                               |
| BECKER, F., NUSKO, G., WELKE, J., HAHN, E. G. & MANSMANN, U. 2007. Benefit-risk analysis of different risk-related surveillance schedules following colorectal polypectomy. <i>Hepato-Gastroenterology</i> , 54, 2249-58.                                                                                                                                            | No original data                                            |
| BECKER, F., NUSKO, G., WELKE, J., HAHN, E. G. & MANSMANN, U. 2007. Follow-up after colorectal polypectomy: a benefit-risk analysis of German surveillance recommendations. <i>International Journal of Colorectal Disease</i> , 22, 929-39.                                                                                                                          | No original data                                            |
| BJERRUM, A., MILTER, M. C., ANDERSEN, O., FISCHER, A. & LYNGE, E. 2015. Risk stratification and detection of new colorectal neoplasms after colorectal cancer screening with faecal occult blood test: experiences from a Danish screening cohort. <i>European Journal of Gastroenterology &amp; Hepatology</i> , 27, 1433-7.                                        | No relevant outcomes reported                               |
| BOTTERI, E., CROSTA, C., BAGNARDI, V., TAMAYO, D., SONZOGNI, A. M., DE ROBERTO, G., DE LEONE, A., LOWENFELS, A. & MAISONNEUVE, P. 2016. Predictors of advanced colorectal neoplasia at initial and surveillance colonoscopy after positive screening immunochemical faecal occult blood test. <i>Digestive &amp; Liver Disease</i> , 48, 321-6.                      | No relevant outcomes                                        |
| BRAWARSKY, P., NEVILLE, B. A., FITZMAURICE, G. M., EARLE, C. & HAAS, J. S. 2013. Surveillance after resection for colorectal cancer. <i>Cancer</i> , 119, 1235-42.                                                                                                                                                                                                   | No relevant outcomes                                        |
| BRENNER, H., ALTENHOFEN, L. & HOFFMEISTER, M. 2010. Estimated long-term effects of the initial 6 years of the German screening colonoscopy program. <i>Gastrointestinal Endoscopy</i> , 72, 784-9.                                                                                                                                                                   | Not about surveillance                                      |
| BRENNER, H., ALTENHOFEN, L., STOCK, C. & HOFFMEISTER, M. 2015. Prevention, early detection, and overdiagnosis of colorectal cancer within 10 years of screening colonoscopy in Germany. <i>Clinical Gastroenterology &amp; Hepatology</i> , 13, 717-23.                                                                                                              | Not about surveillance                                      |
| BRENNER, H., CHANG-CLAUDE, J., JANSEN, L., SEILER, C. M. & HOFFMEISTER, M. 2012. Role of colonoscopy and polyp characteristics in colorectal cancer after colonoscopic polyp detection: a population-based case-control study. <i>Annals of Internal Medicine</i> , 157, 225-32.                                                                                     | Includes patients with remaining polyps                     |





|                                                                                                                                                                                                                                                                                                                                                                                                      |                                                                                     |
|------------------------------------------------------------------------------------------------------------------------------------------------------------------------------------------------------------------------------------------------------------------------------------------------------------------------------------------------------------------------------------------------------|-------------------------------------------------------------------------------------|
| CAFFERTY, F. H., WONG, J. M., YEN, A. M., DUFFY, S. W., ATKIN, W. S. & CHEN, T. H. 2007. Findings at follow-up endoscopies in subjects with suspected colorectal abnormalities: effects of baseline findings and time to follow-up. <i>Cancer Journal</i> , 13, 263-70.                                                                                                                              | No relevant outcomes                                                                |
| CHA, J. M., KOZAREK, R. A., LA SELVA, D., GLUCK, M., ROSS, A., CHIOREAN, M., KOCH, J. & LIN, O. S. 2016. Risks and Benefits of Colonoscopy in Patients 90 Years or Older, Compared With Younger Patients. <i>Clinical Gastroenterology &amp; Hepatology</i> , 14, 80-6.e1.                                                                                                                           | Elderly                                                                             |
| CHIU, H. M., LEE, Y. C., TU, C. H., CHANG, L. C., HSU, W. F., CHOU, C. K., TSAI, K. F., LIANG, J. T., SHUN, C. T. & WU, M. S. 2015. Effects of metabolic syndrome and findings from baseline colonoscopies on occurrence of colorectal neoplasms. <i>Clinical Gastroenterology &amp; Hepatology</i> , 13, 1134-42.e8.                                                                                | No relevant analyses                                                                |
| CHOKSHI, R. V., HOVIS, C. E., HOLLANDER, T., EARLY, D. S. & WANG, J. S. 2012. Prevalence of missed adenomas in patients with inadequate bowel preparation on screening colonoscopy. <i>Gastrointestinal Endoscopy</i> , 75, 1197-203.                                                                                                                                                                | No relevant outcome                                                                 |
| COOPER, G. S., KOU, T. D., BARNHOLTZ SLOAN, J. S., KOROUKIAN, S. M. & SCHLUCHTER, M. D. 2013. Use of colonoscopy for polyp surveillance in Medicare beneficiaries. <i>Cancer</i> , 119, 1800-7.                                                                                                                                                                                                      | No relevant outcome                                                                 |
| COOPER, G. S., XU, F., BARNHOLTZ SLOAN, J. S., SCHLUCHTER, M. D. & KOROUKIAN, S. M. 2012. Prevalence and predictors of interval colorectal cancers in medicare beneficiaries. <i>Cancer</i> , 118, 3044-52.                                                                                                                                                                                          | Not relevant population                                                             |
| CRISPIN, A., MANSMANN, U., MUNTE, A., OP DEN WINKEL, M., GOKE, B. & KOLLIGS, F. T. 2013. A direct comparison of the prevalence of advanced adenoma and cancer between surveillance and screening colonoscopies. <i>Digestion</i> , 87, 170-5.                                                                                                                                                        | No comparison data incidence only                                                   |
| CURRIE, A. C., ASKARI, A., RAO, C., SAUNDERS, B. P., ATHANASIOU, T., FAIZ, O. D. & KENNEDY, R. H. 2016. The potential impact of local excision for T1 colonic cancer in elderly and comorbid populations: a decision analysis. <i>Gastrointestinal Endoscopy</i> , 84, 986-994.                                                                                                                      | No relevant outcomes                                                                |
| DOUBENI, C. A., CORLEY, D. A., QUINN, V. P., JENSEN, C. D., ZAUBER, A. G., GOODMAN, M., JOHNSON, J. R., MEHTA, S. J., BECERRA, T. A., ZHAO, W. K., SCHOTTINGER, J., DORIA-ROSE, V. P., LEVIN, T. R., WEISS, N. S. & FLETCHER, R. H. 2016. Effectiveness of screening colonoscopy in reducing the risk of death from right and left colon cancer: a large community-based study. <i>Gut</i> , 12, 12. | Not age / study design                                                              |
| FIGUEIREDO, J. C., CROCKETT, S. D., SNOVER, D. C., MORRIS, C. B., MCKEOWN-EYSSEN, G., SANDLER, R. S., AHNEN, D. J., ROBERTSON, D. J., BURKE, C. A., BRESALIER, R. S., CHURCH, J. M., CHURCH, T. R. & BARON, J. A. 2015. Smoking-associated risks of conventional adenomas and serrated polyps in the colorectum. <i>Cancer Causes &amp; Control</i> , 26, 377-86.                                    | Outcome not relevant                                                                |
| FORSBERG, A., HAMMAR, U., EKBOM, A. & HULTCRANTZ, R. 2017. Post-colonoscopy colorectal cancers in Sweden: room for quality improvement. <i>European Journal of Gastroenterology &amp; Hepatology</i> , 29, 855-860.                                                                                                                                                                                  | Not a surveillance populations                                                      |
| GOOD, N. M., MACRAE, F. A., YOUNG, G. P., O'DYWYER, J., SLATTERY, M., VENABLES, W., LOCKETT, T. J. & O'DWYER, M. 2015. Ideal colonoscopic surveillance intervals to reduce incidence of advanced adenoma and colorectal cancer. <i>Journal of Gastroenterology &amp; Hepatology</i> , 30, 1147-54.                                                                                                   | Personal or family history of CRC                                                   |
| GROSS, C. P., SOULOS, P. R., ROSS, J. S., CRAMER, L. D., GUERRERO, C., TINETTI, M. E. & BRAITHWAITE, R. S. 2011. Assessing the impact of screening colonoscopy on mortality in the medicare population. <i>Journal of General Internal Medicine</i> , 26, 1441-9.                                                                                                                                    | Elderly - No relevant outcomes                                                      |
| GUPTA, S., JACOBS, E. T., BARON, J. A., LIEBERMAN, D. A., MURPHY, G., LADABAUM, U., CROSS, A. J., JOVER, R., LIU, L. & MARTINEZ, M. E. 2017. Risk stratification of individuals with low-risk colorectal adenomas using clinical characteristics: a pooled analysis. <i>Gut</i> , 66, 446-453.                                                                                                       | Same studies as Martinez but restricts to low risk excluded as doesn't add new data |

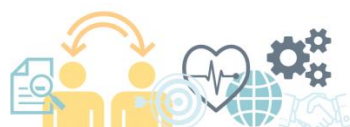

|                                                                                                                                                                                                                                                                                                                                                                                                                                                                                                                                                                                                                           |                                                                       |
|---------------------------------------------------------------------------------------------------------------------------------------------------------------------------------------------------------------------------------------------------------------------------------------------------------------------------------------------------------------------------------------------------------------------------------------------------------------------------------------------------------------------------------------------------------------------------------------------------------------------------|-----------------------------------------------------------------------|
| HAN, M. S., LEE, H. J., PARK, S. J., HONG, S. P., CHEON, J. H., KIM, W. H. & KIM, T. I. 2017. The effect of metformin on the recurrence of colorectal adenoma in diabetic patients with previous colorectal adenoma. <i>International Journal of Colorectal Disease</i> , 32, 1223-1226.                                                                                                                                                                                                                                                                                                                                  | No relevant outcomes                                                  |
| HASSAN, C., PICKHARDT, P. J., DI GIULIO, E., KIM, D. H., ZULLO, A. & MORINI, S. 2009. Cost-effectiveness of early one-year colonoscopy surveillance after polypectomy. <i>Diseases of the Colon &amp; Rectum</i> , 52, 964-71; discussion 971.                                                                                                                                                                                                                                                                                                                                                                            | Not split by prog factors                                             |
| HEINE-BRORING, R. C., WINKELS, R. M., BOTMA, A., WAHAB, P. J., TAN, A. C. I. T. L., NAGENGAST, F. M., WITTEMAN, B. J. M. & KAMPMAN, E. 2013. Dietary supplement use is not associated with recurrence of colorectal adenomas: A prospective cohort study. <i>International Journal of Cancer</i> , 132, 666-675.                                                                                                                                                                                                                                                                                                          | Did not fit pop inclusion criteria adenoma at any point in their life |
| HENNINK, S. D., VAN DER MEULEN-DE JONG, A. E., WOLTERBEEK, R., CROBACH, A. S., BECX, M. C., CROBACH, W. F., VAN HAASSTERT, M., TEN HOVE, W. R., KLEIBEUKER, J. H., MEIJSEN, M. A., NAGENGAST, F. M., RIJK, M. C., SALEMANS, J. M., STRONKHORST, A., TUYNMAN, H. A., VECHT, J., VERHULST, M. L., DE VOS TOT NEDERVEEN CAPPEL, W. H., WALINGA, H., WEINHARDT, O. K., WESTERVELD, D., WITTE, A. M., WOLTERS, H. J., CATS, A., VEENENDAAL, R. A., MORREAU, H. & VASEN, H. F. 2015. Randomized Comparison of Surveillance Intervals in Familial Colorectal Cancer. <i>Journal of Clinical Oncology</i> , 33, 4188-93.          | Includes patients with zero adenomas at baseline no separate data     |
| HIGURASHI, T., HOSONO, K., TAKAHASHI, H., KOMIYA, Y., UMEZAWA, S., SAKAI, E., UCHIYAMA, T., TANIGUCHI, L., HATA, Y., UCHIYAMA, S., HATTORI, A., NAGASE, H., KESSOKU, T., ARIMOTO, J., MATSUHASHI, N., INAYAMA, Y., YAMANAKA, S., TAGURI, M. & NAKAJIMA, A. 2016. Metformin for chemoprevention of metachronous colorectal adenoma or polyps in post-polypectomy patients without diabetes: a multicentre double-blind, placebo-controlled, randomised phase 3 trial. <i>Lancet Oncology</i> , 17, 475-83.                                                                                                                 | Some patients had cancer at baseline                                  |
| HORNUNG, T. A., BEVAN, R., MUMTAZ, S., HORNUNG, B. R. & RUTTER, M. D. 2015. Surveillance colonoscopy in low-risk postpolypectomy patients: Is it necessary? <i>Frontline Gastroenterology</i> , 6, 77-84.                                                                                                                                                                                                                                                                                                                                                                                                                 | No relevant analyses                                                  |
| HOTTA, K., FUJII, T., SAITO, Y. & MATSUDA, T. 2009. Local recurrence after endoscopic resection of colorectal tumors. <i>International Journal of Colorectal Disease</i> , 24, 225-30.                                                                                                                                                                                                                                                                                                                                                                                                                                    | Only local recurrence no relevant outcomes                            |
| HOUISSA, F., KCHIR, H., BOUZAIDI, S., SALEM, M., DEBBECHE, R., TRABELSI, S., MOUSSA, A., SAID, Y. & NAJJAR, T. 2011. Colonoscopy in elderly: feasibility, tolerance and indications: about 901 cases. <i>Tunisie Medicale</i> , 89, 848-52.                                                                                                                                                                                                                                                                                                                                                                               | Elderly No relevant outcomes                                          |
| IACOPINI, F. 2015. The post-polypectomy surveillance. <i>Giornale Italiano di Endoscopia Digestiva</i> , 38, 61-65.                                                                                                                                                                                                                                                                                                                                                                                                                                                                                                       | Non English                                                           |
| ISOHATA, N., YAMADA, R., MIYAKURA, Y., UTANO, K., ENDO, S., KUMAMOTO, K., AIZAWA, M., NEMOTO, D., KATO, H. & TOGASHI, K. 2016. Validity and safety of colonoscopy in the very elderly: multicenter study in Japan. <i>Journal of gastroenterology and hepatology (australia)</i> . Conference: asia pacific digestive week, APDW 2016. Japan. Conference start: 20161102. Conference end: 20161105 [Online], 31. Available: <a href="http://onlinelibrary.wiley.com/o/cochrane/clcentral/articles/915/CN-01252915/frame.html">http://onlinelibrary.wiley.com/o/cochrane/clcentral/articles/915/CN-01252915/frame.html</a> | Elderly No relevant outcomes                                          |
| JACOBS, E. T., MARTINEZ, M. E., ALBERTS, D. S., JIANG, R., LANCE, P., LOWE, K. A. & THOMPSON, P. A. 2007. Association between body size and colorectal adenoma recurrence. <i>Clinical Gastroenterology &amp; Hepatology</i> , 5, 982-90.                                                                                                                                                                                                                                                                                                                                                                                 | pooled data already included in Martinez                              |
| JANG, E. S., KIM, J. W., JUNG, Y. J., JEONG, J. B., KIM, B. G., LEE, K. L., KIM, J. S., JUNG, H. C. & SONG, I. S. 2013. Clinical and endoscopic predictors of colorectal adenoma recurrence after colon polypectomy. <i>Turkish Journal of Gastroenterology</i> , 24, 476-82.                                                                                                                                                                                                                                                                                                                                             | No relevant outcomes                                                  |
| JOHN, B. J., IRUKULLA, S., PILGRIM, G., SWIFT, I. & ABULAFI, A. M. 2008. Surveillance colonoscopies for colorectal polyps--too often, too many! An Audit at a Large District General Hospital. <i>Colorectal Disease</i> , 10, 898-900.                                                                                                                                                                                                                                                                                                                                                                                   | Adherence to guidelines only                                          |



|                                                                                                                                                                                                                                                                                                                                                                                                                                                                                                            |                                                                   |
|------------------------------------------------------------------------------------------------------------------------------------------------------------------------------------------------------------------------------------------------------------------------------------------------------------------------------------------------------------------------------------------------------------------------------------------------------------------------------------------------------------|-------------------------------------------------------------------|
| JORGENSEN, O. D., KRONBORG, O., FENGER, C. & RASMUSSEN, M. 2007. Influence of long-term colonoscopic surveillance on incidence of colorectal cancer and death from the disease in patients with precursors (adenomas). <i>Acta Oncologica</i> , 46, 355-60.                                                                                                                                                                                                                                                | Barium enema                                                      |
| KAHI, C. J., AZZOUZ, F., JULIAR, B. E. & IMPERIALE, T. F. 2007. Survival of elderly persons undergoing colonoscopy: implications for colorectal cancer screening and surveillance. <i>Gastrointestinal Endoscopy</i> , 66, 544-50.                                                                                                                                                                                                                                                                         | Elderly – no relevant outcomes                                    |
| KAWAMURA, T., ODA, Y., MURAKAMI, Y., KOBAYASHI, K., MATSUDA, K., KIDA, M., TANAKA, K., KAWAHARA, Y., KOIZUMI, W., YASUDA, K. & TAJIRI, H. 2014. Relationship between frequency of surveillance colonoscopy and colorectal cancer prevention. <i>Digestive Endoscopy</i> , 26, 409-16.                                                                                                                                                                                                                      | Incorrect population various numbers of colonoscopies in the past |
| KEREN, D., RAINIS, T., GOLDSTEIN, O., STERMER, E. & LAVY, A. 2008. Significant colonic neoplasia prevalence and ASGE recommendations: is it time for a change? <i>Journal of Clinical Gastroenterology</i> , 42, 886-91.                                                                                                                                                                                                                                                                                   | No relevant analyses                                              |
| KIM, B., CHOI, A. R., PARK, S. J., CHEON, J. H., KIM, T. I., KIM, W. H. & HONG, S. P. 2016. Long-Term Outcome and Surveillance Colonoscopy after Successful Endoscopic Treatment of Large Sessile Colorectal Polyps. <i>Yonsei Medical Journal</i> , 57, 1106-14.                                                                                                                                                                                                                                          | No relevant outcomes only local recurrence                        |
| KIM, B., KIM, B. C., NAM, S. Y., NAM, J. H., RYU, K. H., PARK, B. J., SOHN, D. K., HONG, C. W., HAN, K. S. & KIM, H. B. 2017. Visceral Adipose Tissue Volume and the Occurrence of Colorectal Adenoma in Follow-up Colonoscopy for Screening and Surveillance. <i>Nutrition &amp; Cancer</i> , 69, 739-745.                                                                                                                                                                                                | CT colonoscopy                                                    |
| KIM, B. C. 2015. Surveillance Colonoscopy After a Resection of Colorectal Cancer. <i>Annals of Coloproctology</i> , 31, 170-1.                                                                                                                                                                                                                                                                                                                                                                             | Editorial                                                         |
| KIM, H. G., CHO, Y. S., CHA, J. M., SHIN, J. E., KIM, K. O., YANG, H. J., KOO, H. S., JOO, Y. E. & BOO, S. J. 2017. Risk of metachronous neoplasia on surveillance colonoscopy in young patients with colorectal neoplasia. <i>Gastrointestinal Endoscopy</i> , 12, 12.                                                                                                                                                                                                                                    | Screening population not all with adenomas at index               |
| KIM, H. G., LEE, S. H., JEON, S. R., LEE, T. H., KO, B. M., KIM, J. O., CHO, J. Y. & LEE, J. S. 2013. Clinical significance of the first surveillance colonoscopy after endoscopic early colorectal cancer removal. <i>Hepato-Gastroenterology</i> , 60, 1047-52.                                                                                                                                                                                                                                          | Cancer at index                                                   |
| KIM, K. O. 2014. Surveillance colonoscopy after polypectomy: actual practice in Korea. <i>Intestinal Research</i> , 12, 83-4.                                                                                                                                                                                                                                                                                                                                                                              | Letter                                                            |
| KIM, M. C., JUNG, S. W., KIM, C. S., CHUNG, T. H., YOO, C. I. & PARK, N. H. 2012. Metabolic syndrome is associated with increased risk of recurrent colorectal adenomas in Korean men. <i>International Journal of Obesity</i> , 36, 1007-11.                                                                                                                                                                                                                                                              | Outcome AA includes cancer / small sample size                    |
| KIM, N. H., PARK, J. H., PARK, D. I., SOHN, C. I., CHOI, K. & JUNG, Y. S. 2016. Metabolic syndrome is a risk factor for adenoma occurrence at surveillance colonoscopy: A single-center experience in Korea. <i>Medicine</i> , 95, e4454.                                                                                                                                                                                                                                                                  | no relevant outcomes only local recurrence                        |
| KIM, Y., KIM, Y. & LEE, S. 2009. An association between colonic adenoma and abdominal obesity: a cross-sectional study. <i>BMC Gastroenterology</i> , 9, 4.                                                                                                                                                                                                                                                                                                                                                | Compares patients with and without adenomas                       |
| KNABE, M., POHL, J., GERGES, C., ELL, C., NEUHAUS, H. & SCHUMACHER, B. 2014. Standardized long-term follow-up after endoscopic resection of large, nonpedunculated colorectal lesions: a prospective two-center study. <i>American Journal of Gastroenterology</i> , 109, 183-9.                                                                                                                                                                                                                           | No relevant outcomes                                              |
| KOBAYASHI, N., MATSUDA, T., FUJII, T., SANO, Y., KUDO, S.-E., ODA, Y., KANEKO, K., HOTTA, K., SHIMODA, T., SAITO, Y., KONISHI, K., IKEMATSU, H., IISHI, H., KOBAYASHI, K., YAMAGUCHI, Y., HASUDA, K., SHINOHARA, T., ISHIKAWA, H., MURAKAMI, Y., TANIGUCHI, H. & YOSHIDA, S. 2015. Predictive factors of high-risk adenomas at surveillance colonoscopy based on the findings of two-times baseline colonoscopies: results from the Japan polyp study. <i>Gastroenterology</i> . [Online], 148. Available: | Abstract only                                                     |



|                                                                                                                                                                                                                                                                                                                                                                                                                                              |                                                                                                               |
|----------------------------------------------------------------------------------------------------------------------------------------------------------------------------------------------------------------------------------------------------------------------------------------------------------------------------------------------------------------------------------------------------------------------------------------------|---------------------------------------------------------------------------------------------------------------|
| <a href="http://onlinelibrary.wiley.com/doi/10.1111/dise.12644">http://onlinelibrary.wiley.com/doi/10.1111/dise.12644</a>                                                                                                                                                                                                                                                                                                                    |                                                                                                               |
| KUSHNIR, V. M., NALBANTOGLU, I., WATSON, R., GOODWIN, J., SAFAR, E., CHOKSHI, R. V., AZAR, R. R. & DAVIDSON, N. O. 2014. Advanced colorectal adenomas in patients under 45 years of age are mostly sporadic. <i>Digestive Diseases &amp; Sciences</i> , 59, 2757-64.                                                                                                                                                                         | No relevant outcomes                                                                                          |
| KWAH, J., SCHROY, P. C., 3RD, JACOBSON, B. C. & CALDERWOOD, A. H. 2014. Whites and blacks have similar risk of metachronous advanced colorectal neoplasia.[Erratum appears in <i>Dig Dis Sci</i> . 2014 Oct;59(10):2604]. <i>Digestive Diseases &amp; Sciences</i> , 59, 2264-71.                                                                                                                                                            | Analyses of group differences between white and black patients and regression analyses with race as covariate |
| LAISH, I., SEREGEEV, I., NAFTALI, T. & KONIKOFF, F. M. 2017. Surveillance after positive colonoscopy based on adenoma characteristics. <i>Digestive &amp; Liver Disease</i> , 49, 1115-1120.                                                                                                                                                                                                                                                 | No relevant outcome measures                                                                                  |
| LAIYEMO, A., DOUBENI, C., BRIM, H., ASHKTORAB, H., SCHOEN, R., LANZA, E., PLATZ, E. & CROSS, A. 2012. Race and colon cancer disparity: a comparison of the prevalence and recurrence of adenoma in the polyp prevention trial. <i>Gastroenterology</i> . [Online], 142. Available: <a href="http://onlinelibrary.wiley.com/doi/10.1053/j.gastro.2012.05.040">http://onlinelibrary.wiley.com/doi/10.1053/j.gastro.2012.05.040</a>             | Abstract only                                                                                                 |
| LAIYEMO, A. O., DOUBENI, C., BRIM, H., ASHKTORAB, H., SCHOEN, R. E., GUPTA, S., CHARABATY, A., LANZA, E., SMOOT, D. T., PLATZ, E. & CROSS, A. J. 2013. Short- and long-term risk of colorectal adenoma recurrence among whites and blacks. <i>Gastrointestinal Endoscopy</i> , 77, 447-54.                                                                                                                                                   | Analyses with race as the covariate                                                                           |
| LAIYEMO, A. O., PINSKY, P. F., MARCUS, P. M., LANZA, E., CROSS, A. J., SCHATZKIN, A. & SCHOEN, R. E. 2009. Utilization and yield of surveillance colonoscopy in the continued follow-up study of the polyp prevention trial. <i>Clinical Gastroenterology &amp; Hepatology</i> , 7, 562-7; quiz 497.                                                                                                                                         | No relevant outcomes                                                                                          |
| LANSDORP-VOGELAAR, I., FEDEWA, S., LIN, C. C., VIRGO, K. S. & JEMAL, A. 2014. Utilization of surveillance after polypectomy in the medicare population--a cohort study. <i>PLoS ONE [Electronic Resource]</i> , 9, e110937.                                                                                                                                                                                                                  | No relevant outcomes                                                                                          |
| LEE, H. S., PARK, H. W., LEE, J. S., KIM, J. C., CHOE, J., SOH, J. S., LEE, S., BAE, J. H., LEE, H. J., YANG, D. H., MYUNG, S. J., YANG, S. K., CHANG, H. S. & BYEON, J. S. 2017. Treatment outcomes and recurrence following standard cold forceps polypectomy for diminutive polyps. <i>Surgical Endoscopy</i> , 31, 159-169.                                                                                                              | Advanced adenoma not separated in the model                                                                   |
| LEE, J., PARK, S. W., KIM, Y. S., LEE, K. J., SUNG, H., SONG, P. H., YOON, W. J. & MOON, J. S. 2017. Risk factors of missed colorectal lesions after colonoscopy. <i>Medicine</i> , 96, e7468.                                                                                                                                                                                                                                               | Does not compare high and low quality interventions                                                           |
| LEE, J. Y., PARK, H. W., KIM, M. J., LEE, J. S., LEE, H. S., CHANG, H. S., CHOE, J., HWANG, S. W., YANG, D. H., MYUNG, S. J., YANG, S. K. & BYEON, J. S. 2016. Prediction of the Risk of a Metachronous Advanced Colorectal Neoplasm Using a Novel Scoring System. <i>Digestive Diseases &amp; Sciences</i> , 61, 3016-3025.                                                                                                                 | Not all polypectomy patients                                                                                  |
| LEE, S. M., KIM, J. H., SUNG, I. K. & HONG, S. N. 2015. The Risk of Metachronous Advanced Colorectal Neoplasia Rises in Parallel with an Increasing Number of High-Risk Findings at Baseline. <i>Gut &amp; Liver</i> , 9, 741-9.                                                                                                                                                                                                             | No relevant outcomes                                                                                          |
| LIEBERMAN, D. A., WEISS, D. G., HARFORD, W. V., AHNEN, D. J., PROVENZALE, D., SONTAG, S. J., SCHNELL, T. G., CHEJFEC, G., CAMPBELL, D. R., KIDAO, J., BOND, J. H., NELSON, D. B., TRIADAFILOPOULOS, G., RAMIREZ, F. C., COLLINS, J. F., JOHNSTON, T. K., MCQUAID, K. R., GAREWAL, H., SAMPLINER, R. E., ESQUIVEL, R. & ROBERTSON, D. 2007. Five-year colon surveillance after screening colonoscopy. <i>Gastroenterology</i> , 133, 1077-85. | No relevant analyses or outcomes                                                                              |
| LIM, D. N. F., ROBINSON, R., WURM, P., DECAESTECKER, J. & MOORE, A. 2017. Outcome of an endoscopic mucosal resection service for large sessile colonic polyps (>= 20 mm) over A                                                                                                                                                                                                                                                              | No relevant outcomes                                                                                          |

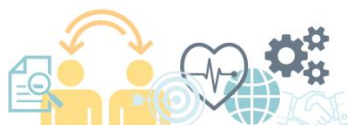

|                                                                                                                                                                                                                                                                                                                                                                                                                                                                                                                                                                                                                                                                                                                   |                                                             |
|-------------------------------------------------------------------------------------------------------------------------------------------------------------------------------------------------------------------------------------------------------------------------------------------------------------------------------------------------------------------------------------------------------------------------------------------------------------------------------------------------------------------------------------------------------------------------------------------------------------------------------------------------------------------------------------------------------------------|-------------------------------------------------------------|
| 9-Year period: A single centre experience and analysis of change over time in a university teaching hospital. <i>Journal of Gastroenterology and Hepatology Research</i> , 6, 2318-2323.                                                                                                                                                                                                                                                                                                                                                                                                                                                                                                                          |                                                             |
| LIN, C. C., HUANG, K. W., LUO, J. C., WANG, Y. W., HOU, M. C., LIN, H. C., LEE, F. Y. & CHAN, W. L. 2014. Hypertension is an important predictor of recurrent colorectal adenoma after screening colonoscopy with adenoma polypectomy. <i>Journal of the Chinese Medical Association: JCMA</i> , 77, 508-12.                                                                                                                                                                                                                                                                                                                                                                                                      | No relevant outcomes                                        |
| LIN, O. S. 2014. Performing colonoscopy in elderly and very elderly patients: Risks, costs and benefits. <i>World Journal of Gastrointestinal Endoscopy</i> , 6, 220-6                                                                                                                                                                                                                                                                                                                                                                                                                                                                                                                                            | Elderly – no relevant outcomes                              |
| LIU, L., MESSER, K., BARON, J. A., LIEBERMAN, D. A., JACOBS, E. T., CROSS, A. J., MURPHY, G., MARTINEZ, M. E. & GUPTA, S. 2016. A prognostic model for advanced colorectal neoplasia recurrence. <i>Cancer Causes &amp; Control</i> , 27, 1175-85.                                                                                                                                                                                                                                                                                                                                                                                                                                                                | Pooled data from PPT                                        |
| LOFFELD, R. J. 2014. Development of polyps and cancer in patients with a negative colonoscopy: a follow-up study of more than 20 years. <i>Isrn Gastroenterology Print</i> , 2014, 261302.                                                                                                                                                                                                                                                                                                                                                                                                                                                                                                                        | Does not compare high and low quality interventions         |
| LORENZO-ZUNIGA, V., MORENO DE VEGA, V., DOMENECH, E., MANOSA, M., CABRE, E., PLANAS, R. & BOIX, J. 2011. High-definition colonoscopy and risk factors for recurrence of advanced adenomas in patients with a personal history of polyps. <i>European Journal of Gastroenterology &amp; Hepatology</i> , 23, 425-30.                                                                                                                                                                                                                                                                                                                                                                                               | Population excluded some had invasive neoplasia at baseline |
| MARKS, A. R., PIETROFESA, R. A., JENSEN, C. D., ZEBROWSKI, A., CORLEY, D. A. & DOUBENI, C. A. 2015. Metformin use and risk of colorectal adenoma after polypectomy in patients with type 2 diabetes mellitus. <i>Cancer Epidemiology, Biomarkers &amp; Prevention</i> , 24, 1692-8.                                                                                                                                                                                                                                                                                                                                                                                                                               | Exposure metformin use only                                 |
| MARTINEZ, M. E., THOMPSON, P., MESSER, K., ASHBECK, E. L., LIEBERMAN, D. A., BARON, J. A., AHNEN, D. J., ROBERTSON, D. J., JACOBS, E. T., GREENBERG, E. R., CROSS, A. J. & ATKIN, W. 2012. One-year risk for advanced colorectal neoplasia: U.S. versus U.K. risk-stratification guidelines. <i>Annals of Internal Medicine</i> , 157, 856-64.                                                                                                                                                                                                                                                                                                                                                                    | Pooled analysis                                             |
| MATARESE, V. G., FEO, C. V., LANZA, G., FUSETTI, N., CARPANELLI, M. C., CATALDO, S., CIFALA, V., FERRETTI, S., GAFA, R., MARZOLA, M., MONTANARI, E., PALMONARI, C., SIMONE, L., TREVISANI, L., STOCKBRUGGER, R. & GULLINI, S. 2011. The first 2 years of colorectal cancer screening in Ferrara, Italy. <i>European Journal of Cancer Prevention</i> , 20, 166-8.                                                                                                                                                                                                                                                                                                                                                 | No surveillance                                             |
| MATSUDA, T., FUJII, T., SANO, Y., KUDO, S. E., ODA, Y., IGARASHI, M., IISHI, H., MURAKAMI, Y., ISHIKAWA, H., SHIMODA, T., KANEKO, K. & YOSHIDA, S. 2009. Five-year incidence of advanced neoplasia after initial colonoscopy in Japan: a multicenter retrospective cohort study. <i>Japanese Journal of Clinical Oncology</i> , 39, 435-42.                                                                                                                                                                                                                                                                                                                                                                       | Not relevant population                                     |
| MATSUDA, T., FUJII, T., SANO, Y., KUDO, S.-E., ODA, Y., KANEKO, K., HOTTA, K., SHIMODA, T., SAITO, Y., KOBAYASHI, N., KONISHI, K., IKEMATSU, H., IISHI, H., KOBAYASHI, K., YAMAGUCHI, Y., HASUDA, K., SHINOHARA, T., ISHIKAWA, H., MURAKAMI, Y., TANIGUCHI, H., FUJIMORI, T., AJIOKA, Y., SAITO, D. & YOSHIDA, S. 2014. Randomized comparison of surveillance intervals after colonoscopic removal of adenomatous polyps: results from the Japan polyp study. <i>Gastroenterology</i> . [Online], 146. Available: <a href="http://onlinelibrary.wiley.com/o/cochrane/clcentral/articles/250/CN-01061250/frame.html">http://onlinelibrary.wiley.com/o/cochrane/clcentral/articles/250/CN-01061250/frame.html</a> . | Abstract                                                    |
| MATTAR, W. & REX, D. K. 2008. Large sessile adenomas are associated with a high prevalence of synchronous advanced adenomas. <i>Clinical Gastroenterology &amp; Hepatology</i> , 6, 877-9.                                                                                                                                                                                                                                                                                                                                                                                                                                                                                                                        | Not surveillance                                            |
| MCGILL, S. K., SOETIKNO, R., ROUSE, R. V., LAI, H. & KALTENBACH, T. 2017. Patients with Nonpolypoid (Flat and Depressed) Colorectal Neoplasms at Increased Risk for Advanced Neoplasias, Compared with Patients with Polypoid Neoplasms. <i>Clinical Gastroenterology &amp; Hepatology</i> , 15, 249-256.e1.                                                                                                                                                                                                                                                                                                                                                                                                      | Group comparison no relevant data                           |
| MELSON, J., MA, K., ARSHAD, S., GREENSPAN, M., KAMINSKY, T., MELVANI, V., BISHEHSARI, F., MAHON, B. & JAKATE, S. 2016. Presence of small sessile serrated polyps increases rate                                                                                                                                                                                                                                                                                                                                                                                                                                                                                                                                   | No relevant outcome data                                    |



|                                                                                                                                                                                                                                                                                                                                                                                                                                                               |                                               |
|---------------------------------------------------------------------------------------------------------------------------------------------------------------------------------------------------------------------------------------------------------------------------------------------------------------------------------------------------------------------------------------------------------------------------------------------------------------|-----------------------------------------------|
| of advanced neoplasia upon surveillance compared with isolated low-risk tubular adenomas. <i>Gastrointestinal Endoscopy</i> , 84, 307-14.                                                                                                                                                                                                                                                                                                                     |                                               |
| MESHER, D., DOVE-EDWIN, I., SASIENI, P., VASEN, H., BERNSTEIN, I., ROYER-POKORA, B., HOLINSKI-FEDER, E., LALLOO, F., EVANS, D. G., FORSBERG, A., LINDBLOM, A. & THOMAS, H. 2014. A pooled analysis of the outcome of prospective colonoscopic surveillance for familial colorectal cancer. <i>International Journal of Cancer</i> , 134, 939-47.                                                                                                              | Cancer at baseline                            |
| MILLER, H. L., MUKHERJEE, R., TIAN, J. & NAGAR, A. B. 2010. Colonoscopy surveillance after polypectomy may be extended beyond five years. <i>Journal of Clinical Gastroenterology</i> , 44, e162-6.                                                                                                                                                                                                                                                           | No relevant outcomes                          |
| MILSOM, J. W. & SHUKLA, P. 2011. Should intraoperative colonoscopy play a role in the surveillance for colorectal cancer? <i>Diseases of the Colon &amp; Rectum</i> , 54, 504-6.                                                                                                                                                                                                                                                                              | Editorial                                     |
| MITTAL, S., LIN, Y. L., TAN, A., KUO, Y. F., EL-SERAG, H. B. & GOODWIN, J. S. 2014. Limited life expectancy among a subgroup of medicare beneficiaries receiving screening colonoscopies. <i>Clinical Gastroenterology &amp; Hepatology</i> , 12, 443-450.e1.                                                                                                                                                                                                 | Not about risk                                |
| MIZUNO, K., SUZUKI, Y., TAKEUCHI, M., KOBAYASHI, M. & AOYAGI, Y. 2014. Natural history of diminutive colorectal polyps: long-term prospective observation by colonoscopy. <i>Digestive Endoscopy</i> , 26 Suppl 2, 84-9.                                                                                                                                                                                                                                      | Not a relevant population                     |
| MOROIS, S., FOURNIER, A., CLAVEL-CHAPELON, F., MESRINE, S. & BOUTRON-RUAULT, M. C. 2012. Menopausal hormone therapy and risks of colorectal adenomas and cancers in the French E3N prospective cohort: true associations or bias? <i>European Journal of Epidemiology</i> , 27, 439-52.                                                                                                                                                                       | Not relevant population                       |
| MOSS, A., WILLIAMS, S. J., HOURIGAN, L. F., BROWN, G., TAM, W., SINGH, R., ZANATI, S., BURGESS, N. G., SONSON, R., BYTH, K. & BOURKE, M. J. 2015. Long-term adenoma recurrence following wide-field endoscopic mucosal resection (WF-EMR) for advanced colonic mucosal neoplasia is infrequent: results and risk factors in 1000 cases from the Australian Colonic EMR (ACE) study. <i>Gut</i> , 64, 57-65.                                                   | No relevant outcomes                          |
| MUNOZ GARCIA-BORRUEL, M., HERVAS MOLINA, A. J., RODRIGUEZ PERALVAREZ, M. L., MORENO RINCON, E., PEREZ MEDRANO, I., SERRANO RUIZ, F. J., CASAIS JUANENA, L. L., PLEGUEZUELO NAVARRO, M., NARANJO RODRIGUEZ, A. & VILLAR PASTOR, C. 2017. Post-colonoscopy colorectal cancer: Characteristics and predictive factors. <i>Medicina Clinica</i> , 10, 10.                                                                                                         | Non English                                   |
| NAGPAL, S. J. S., MUKHIJA, D., SANAKA, M., LOPEZ, R. & BURKE, C. A. 2017. Metachronous colon polyps in younger versus older adults: a case-control study. <i>Gastrointestinal Endoscopy</i> , 23, 23.                                                                                                                                                                                                                                                         | No relevant outcomes                          |
| NAKADA, A., NIIKURA, R., YAMADA, A., YOSHIDA, S., HIRATA, Y. & KOIKE, K. 2017. The incidence of post-colonoscopy colorectal cancer: a retrospective long-term cohort study using a colonoscopy database. <i>International Journal of Colorectal Disease</i> , 32, 839-845.                                                                                                                                                                                    | Population includes those without polypectomy |
| NAYOR, J., SALTZMAN, J. R., CAMPBELL, E. J., PERENCEVICH, M. L., JAJOO, K. & RICHTER, J. M. 2017. Impact of physician compliance with colonoscopy surveillance guidelines on interval colorectal cancer. <i>Gastrointestinal Endoscopy</i> , 85, 1263-1270.                                                                                                                                                                                                   | Not a relevant population                     |
| NCT. 2014. A Prospective Randomized Controlled Trial of an Endoscopic Quality Improvement Project-2 (EQUIP-2) to Improve Adenoma Detection in Screening and Surveillance Colonoscopy. <i>Clinicaltrials.gov</i> [www.clinicaltrials.gov] [Online]. Available: <a href="http://onlinelibrary.wiley.com/o/cochrane/clcentral/articles/705/CN-01050705/frame.html">http://onlinelibrary.wiley.com/o/cochrane/clcentral/articles/705/CN-01050705/frame.html</a> . | Clinical trials . gov entry only              |
| NISHIHARA, R., WU, K., LOCHHEAD, P., MORIKAWA, T., LIAO, X., QIAN, Z. R., INAMURA, K., KIM, S. A., KUCHIBA, A., YAMAUCHI, M., IMAMURA, Y., WILLETT, W. C., ROSNER, B. A., FUCHS, C. S., GIOVANNUCCI, E., OGINO, S. & CHAN, A. T. 2013. Long-term colorectal-cancer incidence and mortality after lower endoscopy. <i>New England Journal of Medicine</i> , 369, 1095-105.                                                                                     | Not a polypectomy population                  |



|                                                                                                                                                                                                                                                                                                                                                                                                                                                                                                                                                                                                           |                                                 |
|-----------------------------------------------------------------------------------------------------------------------------------------------------------------------------------------------------------------------------------------------------------------------------------------------------------------------------------------------------------------------------------------------------------------------------------------------------------------------------------------------------------------------------------------------------------------------------------------------------------|-------------------------------------------------|
| OH, D. M., LEE, J. K., KIM, H., PARK, C. K., JUNG, J. K., KIM, D. J., CHUNG, Y. J., KIM, T. H., PARK, M. I. & PARK, J. P. 2017. Local Recurrence and Its Risk Factor after Incomplete Resection of Colorectal Advanced Adenomas: A Single Center, Retrospective Study. <i>Korean Journal of Gastroenterology/Taehan Sohwagi Hakhoe Chi</i> , 70, 33-38.                                                                                                                                                                                                                                                   | Not relevant population incomplete resection    |
| OKA, S., TANAKA, S., SAITO, Y., IISHI, H., KUDO, S. E., IKEMATSU, H., IGARASHI, M., SAITOH, Y., INOUE, Y., KOBAYASHI, K., HISABE, T., TSURUTA, O., SANNO, Y., YAMANO, H., SHIMIZU, S., YAHAGI, N., WATANABE, T., NAKAMURA, H., FUJII, T., ISHIKAWA, H., SUGIHARA, K., COLORECTAL ENDOSCOPIC RESECTION STANDARDIZATION IMPLEMENTATION WORKING GROUP OF THE JAPANESE SOCIETY FOR CANCER OF THE, C. & RECTUM, T. J. 2015. Local recurrence after endoscopic resection for large colorectal neoplasia: a multi-center prospective study in Japan. <i>American Journal of Gastroenterology</i> , 110, 697-707. | Not relevant population incomplete resection    |
| PARK, H. W., HAN, S., LEE, J. Y., CHANG, H. S., CHOE, J., CHOI, Y., SO, H., YANG, D. H., MYUNG, S. J., YANG, S. K., KIM, J. H. & BYEON, J. S. 2015. Probability of high-risk colorectal neoplasm recurrence based on the results of two previous colonoscopies. <i>Digestive Diseases &amp; Sciences</i> , 60, 226-33.                                                                                                                                                                                                                                                                                    | Not relevant population not all polypectomy     |
| PARK, S. K., HWANG, S. W., KIM, K. O., CHA, J. M., BOO, S. J., SHIN, J. E., JOO, Y. E., JUNG, Y., LEE, J., YANG, H. J., PARK, D. I. & INTESTINAL CANCER STUDY GROUP OF THE KOREAN ASSOCIATION FOR THE STUDY OF INTESTINAL, D. 2017. Risk of advanced colorectal neoplasm in patients with more than 10 adenomas on index colonoscopy: A Korean Association for the Study of Intestinal Diseases (KASID) study. <i>Journal of Gastroenterology &amp; Hepatology</i> , 32, 803-808.                                                                                                                         | Neoplasia and small scale                       |
| PARK, S. K., KIM, J. W., PARK, S. H., YANG, D. H., JUNG, K. W., KIM, K. J., YE, B. D., MYUNG, S. J., YANG, S. K., KIM, J. H. & BYEON, J. S. 2014. Risk of developing metachronous colon neoplasm after polypectomy: comparison of one-stage versus two-stage polypectomy. <i>Surgical Endoscopy</i> , 28, 1634-40.                                                                                                                                                                                                                                                                                        | population unclear if polypectomy at index only |
| PARK, S. K., SONG, Y. S., JUNG, Y. S., KIM, W. H., SOO EUN, C., KO, B. M., SEO, G. S., CHA, J. M., PARK, J. J., MO MOON, C., JUNG, Y., JEON, S. R. & PARK, D. I. 2017. Do surveillance intervals in patients with more than five adenomas at index colonoscopy be shorter than those in patients with three to four adenomas? A Korean Association for the Study of Intestinal Disease study. <i>Journal of Gastroenterology &amp; Hepatology</i> , 32, 1026-1031.                                                                                                                                        | No relevant outcomes.                           |
| PARKER-RAY, N., BARAKAT, J., ROY, P. K., WHITE, R. E., SCHRADER, R. M. & HOFFMAN, R. M. 2010. Statin use does not prevent recurrent adenomatous polyp formation in a VA population. <i>Indian Journal of Gastroenterology</i> , 29, 106-11.                                                                                                                                                                                                                                                                                                                                                               | Exposure statin use no separate data            |
| PELLISE, M., BURGESS, N. G., TUTTICCI, N., HOURIGAN, L. F., ZANATI, S. A., BROWN, G. J., SINGH, R., WILLIAMS, S. J., RAFTOPOULOS, S. C., ORMONDE, D., MOSS, A., BYTH, K., P'NG, H., MAHAJAN, H., MCLEOD, D. & BOURKE, M. J. 2017. Endoscopic mucosal resection for large serrated lesions in comparison with adenomas: a prospective multicentre study of 2000 lesions. <i>Gut</i> , 66, 644-653.                                                                                                                                                                                                         | Not relevant population no relevant outcomes    |
| POHL, H., ROBERTSON, D. J., MOTT, L. A., AHNEN, D. J., BURKE, C. A., BARRY, E. L., BRESALIER, R. S., FIGUEIREDO, J. C., SHAUKAT, A., SANDLER, R. S. & BARON, J. A. 2016. Association between adenoma location and risk of recurrence. <i>Gastrointestinal Endoscopy</i> , 84, 709-16.                                                                                                                                                                                                                                                                                                                     | Outcome not relevant neoplasia                  |
| PULLENS, H. J., LEENDERS, M., SCHIPPER, M. E., VAN OIJEN, M. G. & SIERSEMA, P. D. 2015. No decrease in the rate of early or missed colorectal cancers after colonoscopy with polypectomy over a 10-year period: a population-based analysis. <i>Clinical Gastroenterology &amp; Hepatology</i> , 13, 140-7.                                                                                                                                                                                                                                                                                               | Not relevant population                         |
| QASIM, A., MULDOON, C. & MCKIERNAN, S. 2009. Colonic adenoma patients have higher incidence of hyperplastic polyps on surveillance colonoscopy. <i>European Journal of Gastroenterology &amp; Hepatology</i> , 21, 877-81.                                                                                                                                                                                                                                                                                                                                                                                | No relevant outcomes in the relevant group      |
| RAJU, G. S., LUM, P. J., ROSS, W. A., THIRUMURTHI, S., MILLER, E., LYNCH, P. M., LEE, J. H., BHUTANI, M. S., SHAFI, M. A., WESTON, B. R., PANDE, M., BRESALIER, R. S., RASHID, A.,                                                                                                                                                                                                                                                                                                                                                                                                                        | Local recurrence no relevant outcome            |

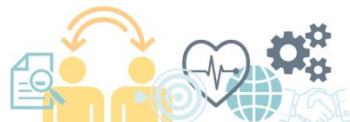

|                                                                                                                                                                                                                                                                                                                                                                                                                                                                                                                                                                                                                    |                                                                     |
|--------------------------------------------------------------------------------------------------------------------------------------------------------------------------------------------------------------------------------------------------------------------------------------------------------------------------------------------------------------------------------------------------------------------------------------------------------------------------------------------------------------------------------------------------------------------------------------------------------------------|---------------------------------------------------------------------|
| MISHRA, L., DAVILA, M. L. & STROEHLEIN, J. R. 2016. Outcome of EMR as an alternative to surgery in patients with complex colon polyps. <i>Gastrointestinal Endoscopy</i> , 84, 315-25.                                                                                                                                                                                                                                                                                                                                                                                                                             |                                                                     |
| RAMSEY, S. D., HOWLADER, N., ETZIONI, R., BROWN, M. L., WARREN, J. L. & NEWCOMB, P. 2007. Surveillance endoscopy does not improve survival for patients with local and regional stage colorectal cancer. <i>Cancer</i> , 109, 2222-8.                                                                                                                                                                                                                                                                                                                                                                              | Cancer population                                                   |
| RANDALL, J. K., GOOD, C. S. & GILBERT, J. M. 2013. 22-year longitudinal study of repetitive colonoscopy in patients with a family history of colorectal cancer. <i>Annals of the Royal College of Surgeons of England</i> , 95, 586-90.                                                                                                                                                                                                                                                                                                                                                                            | Not relevant population at index (mixed, no separate data)          |
| REN, J., KIRKNESS, C. S., KIM, M., ASCHE, C. V. & PULI, S. 2016. Long-term risk of colorectal cancer by gender after positive colonoscopy: population-based cohort study. <i>Current Medical Research &amp; Opinion</i> , 32, 1367-74.                                                                                                                                                                                                                                                                                                                                                                             | Not relevant population (no separate data for polypectomy subgroup) |
| ROBERTSON, D. J., BURKE, C. A., WELCH, H. G., HAILE, R. W., SANDLER, R. S., GREENBERG, E. R., AHNEN, D. J., BRESALIER, R. S., ROTHSTEIN, R. I., COLE, B., MOTT, L. A. & BARON, J. A. 2009. Using the results of a baseline and a surveillance colonoscopy to predict recurrent adenomas with high-risk characteristics. <i>Annals of Internal Medicine</i> , 151, 103-9.                                                                                                                                                                                                                                           | No relevant outcome data                                            |
| ROBERTSON, D. J., LIEBERMAN, D. A., WINAWER, S. J., AHNEN, D. J., BARON, J. A., SCHATZKIN, A., CROSS, A. J., ZAUBER, A. G., CHURCH, T. R., LANCE, P., GREENBERG, E. R. & MARTINEZ, M. E. 2014. Colorectal cancers soon after colonoscopy: a pooled multicohort analysis. <i>Gut</i> , 63, 949-56.                                                                                                                                                                                                                                                                                                                  | Pooled analysis                                                     |
| ROSA, I., FIDALGO, P., SOARES, J., VINGA, S., OLIVEIRA, C., SILVA, J. P., FERRO, S. M., CHAVES, P., OLIVEIRA, A. G. & LEITAO, C. N. 2012. Adenoma incidence decreases under the effect of polypectomy. <i>World Journal of Gastroenterology</i> , 18, 1243-8.                                                                                                                                                                                                                                                                                                                                                      | No relevant outcomes                                                |
| ROZEN, P., SHABTAI, E. I., LIPSHITZ, I. & BARCHANA, M. 2011. Risk for colorectal cancer in elderly persons and possible methodologies for their screening. <i>European Journal of Gastroenterology &amp; Hepatology</i> , 23, 431-7.                                                                                                                                                                                                                                                                                                                                                                               | Elderly – no relevant outcomes                                      |
| SAINI, S., SCHOENFELD, P. & VIJAN, S. 2010. Surveillance colonoscopy is cost-effective for patients with adenomas who are at high risk of colorectal cancer (Provisional abstract). <i>Gastroenterology</i> [Online], 138. Available: <a href="http://onlinelibrary.wiley.com/o/cochrane/cleed/articles/NHSEED-22010001139/frame.html">http://onlinelibrary.wiley.com/o/cochrane/cleed/articles/NHSEED-22010001139/frame.html</a><br><a href="https://www.sciencedirect.com/science/article/pii/S0016508510003392?via%3Dihub">https://www.sciencedirect.com/science/article/pii/S0016508510003392?via%3Dihub</a> . | Population - polyps remained                                        |
| SAINI, S. D., SCHOENFELD, P. & VIJAN, S. 2010. Surveillance colonoscopy is cost-effective for patients with adenomas who are at high risk of colorectal cancer. <i>Gastroenterology</i> , 138, 2292-9, 2299.e1.                                                                                                                                                                                                                                                                                                                                                                                                    | Duplicate                                                           |
| SAKAMOTO, T., MATSUDA, T., OTAKE, Y., NAKAJIMA, T. & SAITO, Y. 2012. Predictive factors of local recurrence after endoscopic piecemeal mucosal resection. <i>Journal of Gastroenterology</i> , 47, 635-40.                                                                                                                                                                                                                                                                                                                                                                                                         | Not relevant outcome                                                |
| SAMADDER, N. J., CURTIN, K., TUOHY, T. M., PAPPAS, L., BOUCHER, K., PROVENZALE, D., ROWE, K. G., MINEAU, G. P., SMITH, K., PIMENTEL, R., KIRCHHOFF, A. C. & BURT, R. W. 2014. Characteristics of missed or interval colorectal cancer and patient survival: a population-based study. <i>Gastroenterology</i> , 146, 950-60.                                                                                                                                                                                                                                                                                       | CRC population and adenoma at index a risk factor                   |
| SANO, Y., FUJII, T., MATSUDA, T., ODA, Y., KUDO, S., IGARASHI, M., IISHI, H., KANEKO, K., HOTTA, K., KOBAYASHI, N., YAMAGUCHI, Y., KOBAYASHI, K., ISHIKAWA, H., MURAKAMI, Y., SHIMODA, T., FUJIMORI, T., AJIOKA, Y., TANIGUCHI, H., IKEMATSU, H., KONISHI, K., SAITO, Y. & YOSHIDA, S. 2014. Study design and patient recruitment for the Japan Polyp Study. <i>Open Access Journal of Clinical Trials</i> , 6, 37-44.                                                                                                                                                                                             | Methodological study                                                |





|                                                                                                                                                                                                                                                                                                                                                                                                          |                                                 |
|----------------------------------------------------------------------------------------------------------------------------------------------------------------------------------------------------------------------------------------------------------------------------------------------------------------------------------------------------------------------------------------------------------|-------------------------------------------------|
| SCHEER, A. & AUER, R. A. 2009. Surveillance after curative resection of colorectal cancer. <i>Clinics in Colon &amp; Rectal Surgery</i> , 22, 242-50.                                                                                                                                                                                                                                                    | Cancer                                          |
| SEO, G. J., SOHN, D. K., HAN, K. S., HONG, C. W., KIM, B. C., PARK, J. W., CHOI, H. S., CHANG, H. J. & OH, J. H. 2010. Recurrence after endoscopic piecemeal mucosal resection for large sessile colorectal polyps. <i>World Journal of Gastroenterology</i> , 16, 2806-11.                                                                                                                              | No relevant outcomes recurrence                 |
| SEO, J. Y., CHUN, J., LEE, C., HONG, K. S., IM, J. P., KIM, S. G., JUNG, H. C. & KIM, J. S. 2015. Novel risk stratification for recurrence after endoscopic resection of advanced colorectal adenoma. <i>Gastrointestinal Endoscopy</i> , 81, 655-64.                                                                                                                                                    | No relevant outcomes                            |
| SEO, M., SONG, E. M., KIM, G. U., HWANG, S. W., PARK, S. H., YANG, D. H., KIM, K. J., YE, B. D., MYUNG, S. J., YANG, S. K. & BYEON, J. S. 2017. Local recurrence and subsequent endoscopic treatment after endoscopic piecemeal mucosal resection with or without precutting in the colorectum. <i>Intestinal Research</i> , 15, 502-510.                                                                | Not relevant outcome recurrence                 |
| SHIN, J. G., KIM, H. W., PARK, S. B., CHOI, C. W., KANG, D. H., KIM, S. J., NAM, H. S. & RYU, D. G. 2017. Polyp missing rate and its associated risk factors of referring hospitals for endoscopic resection of advanced colorectal neoplasia. <i>Medicine</i> , 96, e6742.                                                                                                                              | Not about surveillance rather missing rates     |
| SIDDIQUI, A., CHANG, M., MAHGOUB, A. & SAHDALA, H. N. 2011. Increase in body size is associated with an increased incidence of advanced adenomatous colon polyps in male veteran patients. <i>Digestion</i> , 83, 288-90.                                                                                                                                                                                | Analyses with statin as risk factor             |
| SIDDIQUI, A. A., NAZARIO, H., MAHGOUB, A., PANDOVE, S., CIPHER, D. & SPECHLER, S. J. 2009. The long-term use of statins is associated with a decreased incidence of adenomatous colon polyps. <i>Digestion</i> , 79, 17-22.                                                                                                                                                                              | Elderly – no relevant outcomes                  |
| SINGHAL, S., VERMA, A. & ANAND, K. 2011. Colonoscopy for colorectal cancer screening above age 75: outcomes in symptomatic african american and Hispanic adults. <i>Journal of Gastrointestinal Cancer</i> , 42, 212-6.                                                                                                                                                                                  | Elderly - no relevant outcomes                  |
| SMOOT, D. T., COLLINS, J., DUNLAP, S., ALI-IBRAHIM, A., NOURAI, M., LEE, E. L. & ASHKTORAB, H. 2009. Outcome of colonoscopy in elderly African-American patients. <i>Digestive Diseases &amp; Sciences</i> , 54, 2484-7.                                                                                                                                                                                 | Elderly - no relevant outcomes                  |
| SNEH ARBIB, O., ZEMSER, V., LEIBOVICI WEISSMAN, Y., GINGOLD-BELFER, R., VILKIN, A., EIZENSTEIN, S., COHEN, A., COMANESHTER, D., TZIPORA, S., NIV, Y., RINGEL, Y., LIEBERMAN, D. & LEVI, Z. 2017. Risk of advanced lesions at the first follow-up colonoscopy after polypectomy of diminutive versus small adenomatous polyps of low-grade dysplasia. <i>Gastrointestinal Endoscopy</i> , 86, 713-721.e2. | Neoplasia and small scale                       |
| SO, H., HAN, S., PARK, H. W., KIM, E. H., LEE, J. Y., LEE, H. S., CHANG, H. S., KIM, H. K., CHOE, J., PARK, S. H., YANG, D. H., MYUNG, S. J., YANG, S. K. & BYEON, J. S. 2016. Metabolic factors affect the occurrence of colorectal neoplasm on surveillance colonoscopies. <i>Journal of Gastroenterology &amp; Hepatology</i> , 31, 1273-9.                                                           | Population includes normal no subgroup findings |
| SOMASEKAR, A., JAMES, L., STEPHENSON, B. M., THOMPSON, I. W., VELLACOTT, K. D. & ALLISON, M. C. 2009. The value of auditing negative lower GI investigations preceding a final diagnosis of colorectal cancer. <i>Colorectal Disease</i> , 11, 740-4.                                                                                                                                                    | About delayed diagnosis not surveillance        |
| STOCK, C., HOFFMEISTER, M., BIRKNER, B. & BRENNER, H. 2013. Performance of additional colonoscopies and yield of neoplasms within 3 years after screening colonoscopy: a historical cohort study. <i>Endoscopy</i> , 45, 537-46.                                                                                                                                                                         | Not relevant population separately              |
| STOIAN, M., STATE, N., RUSU, E., STOICA, V., GAVRIL, R. S., GHERASIM, A. & RADULIAN, G. 2014. Malignancy and mortality of colorectal polyps. <i>Revista Medico-Chirurgicala a Societatii de Medici Si Naturalisti Din Iasi</i> , 118, 399-406.                                                                                                                                                           | Study design                                    |
| STROCK, P., MOSSONG, J., SCHEIDEN, R., WEBER, J., HEIECK, F. & KERSCHEN, A. 2011. Colorectal cancer incidence is low in patients following a colonoscopy. <i>Digestive &amp; Liver Disease</i> , 43, 899-904.                                                                                                                                                                                            | Population not all adenomas removed             |
| STUPART, D. A., GOLDBERG, P. A., ALGAR, U. & RAMESAR, R. 2009. Surveillance colonoscopy improves survival in a cohort of subjects with a single mismatch repair gene mutation. <i>Colorectal Disease</i> , 11, 126-30.                                                                                                                                                                                   | Population HNPCC                                |



|                                                                                                                                                                                                                                                                                                                                                                                                                                                                                       |                                                                                    |
|---------------------------------------------------------------------------------------------------------------------------------------------------------------------------------------------------------------------------------------------------------------------------------------------------------------------------------------------------------------------------------------------------------------------------------------------------------------------------------------|------------------------------------------------------------------------------------|
| SUH, K. H., KOO, J. S., HYUN, J. J., CHOI, J., HAN, J. S., KIM, S. Y., JUNG, S. W., JEEN, Y. T., LEE, S. W. & CHOI, J. H. 2014. Risk of adenomas with high-risk characteristics based on two previous colonoscopy. <i>Journal of Gastroenterology &amp; Hepatology</i> , 29, 1985-90.                                                                                                                                                                                                 | High risk findings rather than AA                                                  |
| TAE, C. H., MOON, C. M., KIM, S. E., JUNG, S. A., EUN, C. S., PARK, J. J., SEO, G. S., CHA, J. M., PARK, S. C., CHUN, J., LEE, H. J., JUNG, Y., KIM, J. O., JOO, Y. E. & PARK, D. I. 2017. Risk factors of nonadherence to colonoscopy surveillance after polypectomy and its impact on clinical outcomes: a KASID multicenter study. <i>Journal of Gastroenterology</i> , 52, 809-817.                                                                                               | No relevant outcomes - about adherence                                             |
| TANAKA, Y., ARAI, T., UEGAKI, S., SASAKI, M., KANAZAWA, N. & INAMATSU, T. 2016. Characteristics of colonoscopic findings in the very elderly. <i>Geriatrics &amp; gerontology international</i> , 16, 1319-1323.                                                                                                                                                                                                                                                                      | Not about risks of colonoscopy                                                     |
| TANIGUCHI, L., HIGURASHI, T., UCHIYAMA, T., KONDO, Y., UCHIDA, E., UCHIYAMA, S., JONO, F., HAMANAKA, J., KURIYAMA, H., HATA, Y., ENDO, H., TAKAHASHI, H., NAGASE, H., MATSUHASHI, N. & NAKAJIMA, A. 2014. Metabolic factors accelerate colorectal adenoma recurrence. <i>BMC Gastroenterology</i> , 14, 187.                                                                                                                                                                          | Outcome is advanced adenoma recurrence only 10% advanced not separated in analysis |
| TANIGUCHI, T., HIRAI, K., SUMI, R., HAYASHI, N., MAEDA, K. & ITO, T. 2014. Predictors of colonoscopy use one year after colonoscopy: prospective study of surveillance behavior for colorectal cancer. <i>Health Psychology &amp; Behavioral Medicine</i> , 2, 283-295.                                                                                                                                                                                                               | No relevant outcomes about adherence                                               |
| TANTAU, A. I., TANTAU, M. V., SERBAN, A., ZAHARIE, T., CRUCIAT, C., BADEA, R. & PASCU, O. 2008. Prevalence, histology, endoscopic treatment and long-term follow-up of large colonic polyps and laterally spreading tumors. The Romanian experience. <i>Journal of Gastrointestinal &amp; Liver Diseases</i> , 17, 419-25.                                                                                                                                                            | Cancer population                                                                  |
| TOLL, A. D., FABIUS, D., HYSLOP, T., PEQUIGNOT, E., DIMARINO, A. J., INFANTOLINO, A. & PALAZZO, J. P. 2011. Prognostic significance of high-grade dysplasia in colorectal adenomas. <i>Colorectal Disease</i> , 13, 370-3.                                                                                                                                                                                                                                                            | No relevant outcomes                                                               |
| TRAN, A. H., MAN NGOR, E. W. & WU, B. U. 2014. Surveillance colonoscopy in elderly patients: a retrospective cohort study. <i>JAMA Internal Medicine</i> , 174, 1675-82.                                                                                                                                                                                                                                                                                                              | No appropriate comparator                                                          |
| TUTTICCI, N., KLEIN, A., SONSON, R. & BOURKE, M. J. 2016. Endoscopic resection of subtotal or completely circumferential laterally spreading colonic adenomas: technique, caveats, and outcomes. <i>Endoscopy</i> , 48, 465-71.                                                                                                                                                                                                                                                       | No relevant outcomes about recurrence                                              |
| VALENTIN, F., GUARINOS, C., JUAREZ, M., RODRIGUEZ-SOLER, M., SERRADESANFERM, A., RODRIGUEZ-MORANTA, F., NICOLAS-PEREZ, D., BUJANDA, L., HERRAIZ, M., DE-CASTRO, L., FERNANDEZ-BANARES, F., HERREROS-DE-TEJADA, A., MARTINEZ, F., AGUIRRE, E., FERRANDEZ, A., DIAZ-TASENDE, J., PINOL, V., PAYA, A., EGOAVIL, C., ALENDA, C., CASTELLS, A., JOVER, R. & CUBIELLA, J. 2016. Endoscopic surveillance in patients with multiple (10-100) colorectal polyps. <i>Endoscopy</i> , 48, 56-61. | Not relevant population                                                            |
| VAN HEES, F., HABBEMA, J. D., MEESTER, R. G., LANSDORP-VOGELAAR, I., VAN BALLEGOIJEN, M. & ZAUBER, A. G. 2014. Should colorectal cancer screening be considered in elderly persons without previous screening? A cost-effectiveness analysis. <i>Annals of Internal Medicine</i> , 160, 750-9.                                                                                                                                                                                        | Elderly but only cost effectiveness                                                |
| VAN HEES, F., SAINI, S. D., LANSDORP-VOGELAAR, I., VIJAN, S., MEESTER, R. G., DE KONING, H. J., ZAUBER, A. G. & VAN BALLEGOIJEN, M. 2015. Personalizing colonoscopy screening for elderly individuals based on screening history, cancer risk, and comorbidity status could increase cost effectiveness. <i>Gastroenterology</i> , 149, 1425-37.                                                                                                                                      | Elderly but only a model                                                           |
| VIEL, J. F., STUDER, J. M., OTTIGNON, Y., HIRSCH, J. P. & FRANCHE-COMTE POLYP SURVEILLANCE STUDY, G. 2012. Predictors of colorectal polyp recurrence after the first polypectomy in private practice settings: a cohort study. <i>PLoS ONE [Electronic Resource]</i> , 7, e50990.                                                                                                                                                                                                     | No relevant outcomes                                                               |
| WOODWARD, T. A., HECKMAN, M. G., CLEVELAND, P., DE MELO, S., RAIMONDO, M. & WALLACE, M. 2012. Predictors of complete endoscopic mucosal resection of flat and                                                                                                                                                                                                                                                                                                                         | Not about surveillance                                                             |

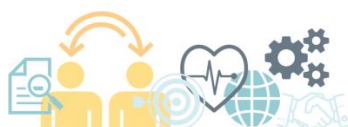

|                                                                                                                                                                                                                                                                                                                                                                                                    |                                               |
|----------------------------------------------------------------------------------------------------------------------------------------------------------------------------------------------------------------------------------------------------------------------------------------------------------------------------------------------------------------------------------------------------|-----------------------------------------------|
| depressed gastrointestinal neoplasia of the colon. <i>American Journal of Gastroenterology</i> , 107, 650-4.                                                                                                                                                                                                                                                                                       |                                               |
| XU, M., WANG, S., CAO, H., WANG, W., PIAO, M., CAO, X., YAN, F. & WANG, B. 2016. Low rate of advanced adenoma formation during a 5-year colonoscopy surveillance period after adequate polypectomy of non-advanced adenoma. <i>Colorectal Disease</i> , 18, 179-86.                                                                                                                                | Includes normal in analysis                   |
| YOSHIDA, N., NAITO, Y., SIAH, K. T., MURAKAMI, T., OGISO, K., HIROSE, R., INADA, Y., INOUE, K., KONISHI, H., KUGAI, M., MORIMOTO, Y., HASEGAWA, D., KANEMASA, K., WAKABAYASHI, N., YAGI, N., YANAGISAWA, A. & ITOH, Y. 2016. High incidence of metachronous advanced adenoma and cancer after endoscopic resection of colon polyps $\geq 20$ mm in size. <i>Digestive Endoscopy</i> , 28, 194-202. | Population includes cancer at baseline        |
| ZAUBER, A. G., WINAWER, S. J., O'BRIEN, M. J., LANSDORP-VOGELAAR, I., VAN BALLEGOIJEN, M., HANKEY, B. F., SHI, W., BOND, J. H., SCHAPIRO, M., PANISH, J. F., STEWART, E. T. & WAYE, J. D. 2012. Colonoscopic polypectomy and long-term prevention of colorectal-cancer deaths. <i>New England Journal of Medicine</i> , 366, 687-96.                                                               | Outcomes not collected at surveillance points |
| ZHANG, L. M., LIU, Y. L., ZHU, Y. M. & ZHANG, Y. Y. 2016. Analysis of colonic adenomas recurrence after adenoma removes. <i>International Journal of Clinical and Experimental Medicine</i> , 9, 21234-21242.                                                                                                                                                                                      | Recurrence only                               |
| ZHONG, Q., SHA, W., ZHANG, A. & HUANG, J. 2016. Colonoscopy surveillance of colorectal polyp recurrence in two years after the first polypectomy. <i>International Journal of Clinical and Experimental Medicine</i> , 9, 20056-20061.                                                                                                                                                             | No relevant outcomes                          |



Supplement: inline-supplementary-material-2 [file inline-supplementary-material-2.pdf]
