# Supplementary material
Source: HighWire-hosted journal article supplement (https://gut.bmj.com/content/gutjnl-2019-319858)
Supplement: inline-supplementary-material-1 [file inline-supplementary-material-1.pdf]

| <b>uniqueid</b> | <b>section</b>  |
|-----------------|-----------------|
| CQ37.1          | Other guideline |
| CQ37.2          | Other guideline |
| CQ37.3          | Other guideline |
| CQ37.4          | Other guideline |
| CQ37.5          | Other guideline |
| CQ37.6          | Other guideline |
| CQ37.7          | Other guideline |
| CQ37.8          | Other guideline |
| CQ37.9          | Other guideline |
| CQ37.10         | Other guideline |
| CQ37.11         | Other guideline |
| CQ1.1           | First           |
| CQ1.2           | First           |
| CQ1.3           | First           |
| CQ1.4           | First           |
| CQ1.5           | First           |
| CQ1.6           | First           |
| CQ1.7           | First           |
| CQ1.8           | First           |
| CQ1.9           | First           |
| CQ1.10          | First           |
| CQ1.11          | First           |
| CQ1.12          | First           |
| CQ1.13          | First           |
| CQ1.14          | First           |
| CQ1.15          | First           |
| CQ1.16          | First           |
| CQ2.1           | First           |
| CQ2.2           | First           |
| CQ2.3           | First           |
| CQ2.4           | First           |
| CQ2.5           | First           |
| CQ2.6           | First           |
| CQ2.7           | First           |
| CQ2.8           | First           |
| CQ2.9           | First           |
| CQ2.10          | First           |
| CQ2.11          | First           |
| CQ2.12          | First           |
| CQ2.13          | First           |
| CQ2.14          | First           |
| CQ2.15          | First           |
| CQ2.16          | First           |

|        |        |
|--------|--------|
| CQ3    | First  |
| CQ4.1  | Second |
| CQ4.2  | Second |
| CQ4.3  | Second |
| CQ4.4  | Second |
| CQ4.5  | Second |
| CQ4.6  | Second |
| CQ4.7  | Second |
| CQ4.8  | Second |
| CQ4.9  | Second |
| CQ4.10 | Second |
| CQ4.11 | Second |
| CQ4.12 | Second |
| CQ4.13 | Second |
| CQ4.14 | Second |
| CQ4.15 | Second |
| CQ4.16 | Second |
| CQ5.1  | Second |
| CQ5.2  | Second |
| CQ5.3  | Second |
| CQ5.4  | Second |
| CQ5.5  | Second |
| CQ5.6  | Second |
| CQ5.7  | Second |
| CQ5.8  | Second |
| CQ5.9  | Second |
| CQ5.10 | Second |
| CQ5.11 | Second |
| CQ5.12 | Second |
| CQ5.13 | Second |
| CQ5.14 | Second |
| CQ5.15 | Second |
| CQ5.16 | Second |
| CQ6.1  | Second |
| CQ6.2  | Second |
| CQ6.3  | Second |
| CQ6.4  | Second |
| CQ6.5  | Second |
| CQ6.6  | Second |
| CQ6.7  | Second |
| CQ6.8  | Second |
| CQ6.9  | Second |
| CQ6.10 | Second |
| CQ6.11 | Second |

|        |                 |
|--------|-----------------|
| CQ6.12 | Second          |
| CQ6.13 | Second          |
| CQ6.14 | Second          |
| CQ6.15 | Second          |
| CQ6.16 | Second          |
| CQ7    | Second          |
| CQ8    | Stop            |
| CQ9    | Stop            |
| CQ10   | Stop            |
| CQ11   | Stop            |
| CQ12   | Stop            |
| CQ13   | Pathology yield |
| CQ14   | Pathology yield |
| CQ15   | Pathology yield |
| CQ16   | Quality of      |
| CQ17   | Non-            |
| CQ18   | Non-            |
| CQ19   | Non-            |
| CQ20   | Non-            |
| CQ21   | Non-            |
| CQ22   | Post-CRC        |
| CQ23   | Post-CRC        |
| CQ24   | Post-CRC        |
| CQ25.1 | Serrated polyps |
| CQ25.2 | Serrated polyps |
| CQ26.1 | Serrated polyps |
| CQ26.2 | Serrated polyps |
| CQ27.1 | Serrated polyps |
| CQ27.2 | Serrated polyps |
| CQ28   | Post-EMR/ESD    |
| CQ29   | Post-EMR/ESD    |
| CQ30   | Post-EMR/ESD    |
| CQ31   | Polyposis/famil |
| CQ32   | Other guideline |
| CQ33   | Other guideline |
| CQ34   | Other guideline |
| CQ35   | Other guideline |
| CQ36   | Other guideline |
| CQ38   | Other guideline |
| CQ39   | Other guideline |
| CQ40   | Other guideline |





What is the evidence that 2nd (and subsequent) surveillance reduces future CRC risk?  
What is the evidence that 2nd (and subsequent) surveillance reduces future CRC risk?  
What is the evidence that 2nd (and subsequent) surveillance reduces future CRC risk?  
What is the evidence that 2nd (and subsequent) surveillance reduces future CRC risk?  
What is the evidence that 2nd (and subsequent) surveillance reduces future CRC risk?  
At what interval should 2nd (and subsequent) surveillance be performed?  
At what age can surveillance be stopped without increasing the risk of CRC development?  
At what estimate of life expectancy can surveillance be stopped without increasing the risk of CRC  
What is the risk of colonoscopy in adults >75 years (or other older age cohort)  
When (and in whom) can surveillance be stopped, relating to colonoscopy findings?  
What threshold (cut-off) should be used to determine whether surveillance is indicated?  
What is the risk of CRC/AA/any adenomas in the general population?  
What is the risk of CRC/AA/any adenomas in faecal occult blood test screening population at  
What is the risk of CRC/AA/any adenomas in symptomatic patients?  
Does a high quality colonoscopy have a significant impact on findings (outcomes) at surveillance  
Can FIT be used for surveillance after resection of adenomas?  
Can colon capsule be used for surveillance after resection of adenomas?  
Can CTC be used for polyp surveillance after curative resection of colorectal cancer?  
Can CTC be used for polyp surveillance after previous endoscopic polypectomy?  
What is the risk of the cumulative radiation dose incurred by CTC polyp surveillance and CTC polyp  
Does surveillance, post-CRC surgical resection, reduce metachronous CRC incidence/mortality?  
Does surveillance, post-CRC endoscopic resection, reduce metachronous CRC incidence/mortality?  
Does surveillance following surgical resection of CRC metastases reduce mortality?  
What is the risk of cancer / advanced neoplasia / neoplasia after detection of a sessile serrated  
What is the risk of cancer / advanced neoplasia / neoplasia after detection of a sessile serrated  
What is the risk of cancer / advanced neoplasia / neoplasia after detection of a sessile serrated  
What is the risk of cancer / advanced neoplasia / neoplasia after detection of a sessile serrated  
What is the risk of cancer / advanced neoplasia / neoplasia after detection of serrated polyposis  
What is the risk of cancer / advanced neoplasia / neoplasia after detection of serrated polyposis  
What is the risk of recurrence after complete (En bloc RO) versus piecemeal EMR  
What is the risk of recurrence after complete (En bloc RO) versus piecemeal ESD  
What is the risk of early recurrence after EMR  
Polyposis/family history follow-up  
Patient communication, including: Patient lifestyle modifications; What information should patient  
Optical diagnosis – virtual ADR without histology  
How should polyp size be measured? Endoscopy vs histology  
Colonoscopy risks  
Modelling of workload effect of change in surveillance guidelines  
How to implement? Validating (and whether prospective or retrospective)  
Are there any training aspects?  
What are the key unanswered questions? – priorities for research; what affects drop-out / default

| population | intervention    | comparator      | outcome       |
|------------|-----------------|-----------------|---------------|
| No PICO    | No PICO         | No PICO         | No PICO       |
| No PICO    | No PICO         | No PICO         | No PICO       |
| No PICO    | No PICO         | No PICO         | No PICO       |
| No PICO    | No PICO         | No PICO         | No PICO       |
| No PICO    | No PICO         | No PICO         | No PICO       |
| No PICO    | No PICO         | No PICO         | No PICO       |
| No PICO    | No PICO         | No PICO         | No PICO       |
| No PICO    | No PICO         | No PICO         | No PICO       |
| No PICO    | No PICO         | No PICO         | No PICO       |
| No PICO    | No PICO         | No PICO         | No PICO       |
| No PICO    | No PICO         | No PICO         | No PICO       |
| Adults (18 | Polyp: High     | Polyp: Low      | Advanced      |
| Adults (18 | Polyp: Villous  | Polyp: NO       | Advanced      |
| Adults (18 | Polyp: Size of  | Polyp: Size of  | Advanced      |
| Adults (18 | Polyp: Number   | N/a             | Advanced      |
| Adults (18 | Polyp:          | Polyp: Absence  | Advanced      |
| Adults (18 | Polyp:          | N/a             | Advanced      |
| Adults (18 | Patient: Male   | Patient: Female | Advanced      |
| Adults (18 | Patient: Family | Patient: NO     | Advanced      |
| Adults (18 | Patient:        | Patient: NOT in | Advanced      |
| Adults (18 | Patient: Older  | Patient: NOT in | Advanced      |
| Adults (18 | Patient:        | N/a             | Advanced      |
| Adults (18 | Patient: High   | Patient: NOT    | Advanced      |
| Adults (18 | Index           | Inadequate/po   | Advanced      |
| Adults (18 | Index           | incompetete     | Advanced      |
| Adults (18 | Index           | NOT high        | Advanced      |
| Adults (18 | Index           | no high-        | Advanced      |
| Adults (18 | Colonoscopic    | No surveillance | Long-term CRC |
| Adults (18 | Colonoscopic    | No surveillance | Long-term CRC |
| Adults (18 | Colonoscopic    | No surveillance | Long-term CRC |
| Adults (18 | Colonoscopic    | No surveillance | Long-term CRC |
| Adults (18 | Colonoscopic    | No surveillance | Long-term CRC |
| Adults (18 | Colonoscopic    | No surveillance | Long-term CRC |
| Adults (18 | Colonoscopic    | No surveillance | Long-term CRC |
| Adults (18 | Colonoscopic    | No surveillance | Long-term CRC |
| Adults (18 | Colonoscopic    | No surveillance | Long-term CRC |
| Adults (18 | Colonoscopic    | No surveillance | Long-term CRC |
| Adults (18 | Colonoscopic    | No surveillance | Long-term CRC |
| Adults (18 | Colonoscopic    | No surveillance | Long-term CRC |
| Adults (18 | Colonoscopic    | No surveillance | Long-term CRC |
| Adults (18 | Colonoscopic    | No surveillance | Long-term CRC |
| Adults (18 | Colonoscopic    | No surveillance | Long-term CRC |
| Adults (18 | Colonoscopic    | No surveillance | Long-term CRC |
| Adults (18 | Colonoscopic    | No surveillance | Long-term CRC |
| Adults (18 | Colonoscopic    | No surveillance | Long-term CRC |
| Adults (18 | Colonoscopic    | No surveillance | Long-term CRC |
| Adults (18 | Colonoscopic    | No surveillance | Long-term CRC |

|            |                 |              |               |
|------------|-----------------|--------------|---------------|
| Adults (18 | "Longer"        | "Shorter"    | Advanced      |
| Adults (18 | Findings at 1st | Absence of I | Advanced      |
| Adults (18 | Findings at 1st | Absence of I | Advanced      |
| Adults (18 | Findings at 1st | Absence of I | Advanced      |
| Adults (18 | Findings at 1st | Absence of I | Advanced      |
| Adults (18 | Findings at 1st | Absence of I | Advanced      |
| Adults (18 | Findings at 1st | Absence of I | Advanced      |
| Adults (18 | Findings at 1st | Absence of I | Advanced      |
| Adults (18 | Findings at 1st | Absence of I | Advanced      |
| Adults (18 | Findings at 1st | Absence of I | Advanced      |
| Adults (18 | Findings at 1st | Absence of I | Advanced      |
| Adults (18 | Findings at 1st | Absence of I | Advanced      |
| Adults (18 | Findings at 1st | Absence of I | Advanced      |
| Adults (18 | Findings at 1st | Absence of I | Advanced      |
| Adults (18 | Findings at 1st | Absence of I | Advanced      |
| Adults (18 | Findings at 1st | Absence of I | Advanced      |
| Adults (18 | Findings at 1st | Absence of I | Advanced      |
| Adults (18 | Findings at 1st | Absence of I | Advanced      |
| Adults (18 | Summative       | Absence of I | Advanced      |
| Adults (18 | Summative       | Absence of I | Advanced      |
| Adults (18 | Summative       | Absence of I | Advanced      |
| Adults (18 | Summative       | Absence of I | Advanced      |
| Adults (18 | Summative       | Absence of I | Advanced      |
| Adults (18 | Summative       | Absence of I | Advanced      |
| Adults (18 | Summative       | Absence of I | Advanced      |
| Adults (18 | Summative       | Absence of I | Advanced      |
| Adults (18 | Summative       | Absence of I | Advanced      |
| Adults (18 | Summative       | Absence of I | Advanced      |
| Adults (18 | Summative       | Absence of I | Advanced      |
| Adults (18 | Summative       | Absence of I | Advanced      |
| Adults (18 | Summative       | Absence of I | Advanced      |
| Adults (18 | Summative       | Absence of I | Advanced      |
| Adults (18 | Summative       | Absence of I | Advanced      |
| Adults (18 | Summative       | Absence of I | Advanced      |
| Adults (18 | Summative       | Absence of I | Advanced      |
| Adults (18 | Summative       | Absence of I | Advanced      |
| Adults (18 | Summative       | Absence of I | Advanced      |
| Adults (18 | Polyp: High     | No 2nd       | Long-term CRC |
| Adults (18 | Polyp: Villous  | No 2nd       | Long-term CRC |
| Adults (18 | Polyp: Size of  | No 2nd       | Long-term CRC |
| Adults (18 | Polyp: Number   | No 2nd       | Long-term CRC |
| Adults (18 | Polyp:          | No 2nd       | Long-term CRC |
| Adults (18 | Polyp:          | No 2nd       | Long-term CRC |
| Adults (18 | Patient: Male   | No 2nd       | Long-term CRC |
| Adults (18 | Patient: Family | No 2nd       | Long-term CRC |
| Adults (18 | Patient:        | No 2nd       | Long-term CRC |
| Adults (18 | Patient: Older  | No 2nd       | Long-term CRC |
| Adults (18 | Patient:        | No 2nd       | Long-term CRC |



|                |                  |                 |                 |
|----------------|------------------|-----------------|-----------------|
| Adults (18     | Patient: High    | No 2nd          | Long-term CRC   |
| Adults (18     | Index            | No 2nd          | Long-term CRC   |
| Adults (18     | Index            | No 2nd          | Long-term CRC   |
| Adults (18     | Index            | No 2nd          | Long-term CRC   |
| Adults (18     | Index            | No 2nd          | Long-term CRC   |
| Adults (18     | "Longer"         | "Shorter"       | Advanced        |
| Adults >75     | endoscopic       | No surveillance | Subsequent      |
| Adults age >65 | endoscopic       | No surveillance | Subsequent      |
| Adults >75 who | colonoscopy      | No              | Subsequent      |
| No PICO        | No PICO          | No PICO         | No PICO         |
| No PICO        | No PICO          | No PICO         | No PICO         |
| Asymptomatic   | colonoscopy      | -               | Prevalence at   |
| Adults (18+    | colonoscopy      | -               | Prevalence at   |
| Adults (18+    | colonoscopy      | -               | Prevalence at   |
| Adults         | High quality     | "Standard       | Advanced        |
| Adults (>18    | FIT surveillance | endoscopic      | Subsequent AA   |
| Adults (>18    | Capsule          | endoscopic      | Subsequent AA   |
| Adults 18+     | CT               | Conventional    | Sensitivity and |
| Adults 18+     | CT               | Conventional    | Sensitivity and |
| Adults 18+     | CT               | None            | Estimated (a)   |
| adults who     | FIT;             | absence of      | Incidence of    |
| adults who     | FIT;             | absence of      | Incidence of    |
| adults who     | FIT;             | absence of      | Incidence of    |
| Adults with a  | endoscopic       | No surveillance | Any neoplasia   |
| Adults with a  | endoscopic       | No surveillance | Any neoplasia   |
| Adults with a  | endoscopic       | No surveillance | Any neoplasia   |
| Adults with a  | endoscopic       | No surveillance | Any neoplasia   |
| Adults with a  | endoscopic       | No surveillance | Any neoplasia   |
| Adults with a  | endoscopic       | No surveillance | Any neoplasia   |
| Adults meeting | Endoscopic       | Endoscopic      | Polyp           |
| Patients       | Endoscopic       | Endoscopic      | Polyp           |
| Patients       | Endoscopic       | Endoscopic      | Polyp           |
| No PICO        | No PICO          | No PICO         | No PICO         |
| Adults (>18    | No PICO          | No PICO         | No PICO         |
| No PICO        | No PICO          | No PICO         | No PICO         |
| patients       | size of polyp    | visual          | assigning an    |
| No PICO        | No PICO          | No PICO         | No PICO         |
| No PICO        | No PICO          | No PICO         | No PICO         |
| No PICO        | No PICO          | No PICO         | No PICO         |
| No PICO        | No PICO          | No PICO         | No PICO         |
| No PICO        | No PICO          | No PICO         | No PICO         |
