# Supplementary material
Source: HighWire-hosted journal article supplement (https://gut.bmj.com/content/gutjnl-2019-319858)
Supplement: inline-supplementary-material-3 [file inline-supplementary-material-3.pdf]

## ADSUR NON-CORE LITERATURE SEARCH FOR THE GUIDELINE DEVELOPMENT GROUP DATABASES AND SEARCH STRATEGIES

Search strategies used for the adenoma surveillance guideline are outlined below and were run in accordance with the methodology in the NICE guidelines manual (2014). All searches were run up to February 2018 unless otherwise stated.

### **DATABASES**

Searches for the clinical topics/questions were run in three electronic databases between 9<sup>th</sup> and 20<sup>th</sup> February 2018:

1. Medline, Medline Epub Ahead of Print, In-Process & Other Non-Indexed Citations: Ovid, 1946 to 2018
2. Embase: Ovid, 1974 to 2018
3. Cochrane Library: Wiley
  - Cochrane Database of Systematic Reviews: Wiley, CDR 1996-2018
  - Database of Abstracts of Reviews of Effect: Wiley, DARE 1995-2015
  - Cochrane Central Register of Controlled Trials: Wiley, CENTRAL 1898-2018
  - Health Technology Assessment Database: Wiley, HTA 1995-2016
  - NHS Economic Evaluation Database: Wiley, NHS EED 1995-2015

### **Records retrieved by database**

| Database                          | Clinical topic/questions |            |               |               |               |               |             |
|-----------------------------------|--------------------------|------------|---------------|---------------|---------------|---------------|-------------|
|                                   | CQ17                     | CQ18       | CQ19-<br>CQ21 | CQ22-<br>CQ24 | CQ25-<br>CQ27 | CQ28-<br>CQ30 | CQ32        |
| Medline                           | 854                      | 360        | 1226          | 1512          | 371           | 419           | 1031        |
| Embase                            | 809                      | 359        | 1672          | 934           | 323           | 395           | 805         |
| Cochrane Library                  | 202                      | 40         | 174           | 187           | 97            | 90            | 1055        |
| Total retrieved                   | 1865                     | 759        | 3072          | 2633          | 791           | 904           | 2891        |
| <b>Unique records in database</b> | <b>964</b>               | <b>478</b> | <b>1858</b>   | <b>1774</b>   | <b>472</b>    | <b>565</b>    | <b>1727</b> |

### **CLINICAL TOPIC: CQ17 NON-COLONOSCOPIC SURVEILLANCE MODALITIES (FIT)**

#### **Clinical question:**

- Can FIT be used for surveillance after resection of adenomas?

| <b>P</b>                                                                                                                                            | <b>I/E</b>       | <b>C</b>                | <b>O</b>                                                                                                                                                                                                                                                                    |
|-----------------------------------------------------------------------------------------------------------------------------------------------------|------------------|-------------------------|-----------------------------------------------------------------------------------------------------------------------------------------------------------------------------------------------------------------------------------------------------------------------------|
| Adults (>18 years) who have been diagnosed with at least one colorectal adenoma and all detected adenomas have been resected completely at baseline | FIT surveillance | endoscopic surveillance | Subsequent AA incidence, CRC incidence, CRC mortality. Resource use (e.g. Number of procedures/attendances at follow-up/tests completed). Patient-reported outcomes (e.g. preferences, QoL, satisfaction)? Costs and/or cost-effectiveness? Conversion rate to colonoscopy. |

The electronic literature searches were run on 15<sup>th</sup> February 2018 to identify articles which report non-colonoscopy surveillance modalities FIT. Terms for 'faecal immunochemical test' or 'FOBT' (3-7,

8) were combined with 'colorectal cancer' population terms (1-2). An English language limit, exclusion publications filter (11-27) and date restriction from 2007 to 2018 was applied.

### Medline search terms

15<sup>th</sup> February 2018

| #  | Searches                                                                                                                                                          |
|----|-------------------------------------------------------------------------------------------------------------------------------------------------------------------|
| 1  | exp Colorectal Neoplasms/                                                                                                                                         |
| 2  | ((colorect* or colo rect* or colon or bowel* or intestine*) adj3 (cancer* or neoplas* or oncolog* or malignan* or tumo?r* or carcinoma* or adeno* or polyp*)).tw. |
| 3  | (fit* or fobt*).tw.                                                                                                                                               |
| 4  | ((faecal or fecal or feces or faeces) and occult blood).tw.                                                                                                       |
| 5  | exp Immunochemistry/                                                                                                                                              |
| 6  | (immunohistochem* or immunochem* or immunol*).tw.                                                                                                                 |
| 7  | (1 or 2) and (3 or 4) and (5 or 6)                                                                                                                                |
| 8  | ((faecal or fecal) adj1 immunochem* test*).tw.                                                                                                                    |
| 9  | 7 or 8                                                                                                                                                            |
| 10 | limit 9 to (english language and yr="2007 -Current")                                                                                                              |
| 11 | letter/                                                                                                                                                           |
| 12 | editorial/                                                                                                                                                        |
| 13 | news/                                                                                                                                                             |
| 14 | exp historical article/                                                                                                                                           |
| 15 | anecdotes as topic/                                                                                                                                               |
| 16 | comment/                                                                                                                                                          |
| 17 | case report/                                                                                                                                                      |
| 18 | (letter or comment*).ti.                                                                                                                                          |
| 19 | or/11-18                                                                                                                                                          |
| 20 | randomized controlled trial/ or random*.ti,ab.                                                                                                                    |
| 21 | 19 not 20                                                                                                                                                         |
| 22 | animals/ not humans/                                                                                                                                              |
| 23 | exp animals, laboratory/                                                                                                                                          |
| 24 | exp animal experimentation/                                                                                                                                       |
| 25 | exp models, animal/                                                                                                                                               |
| 26 | exp rodentia/                                                                                                                                                     |
| 27 | (rat or rats or mouse or mice).ti.                                                                                                                                |
| 28 | or/21-27                                                                                                                                                          |
| 29 | 10 not 28                                                                                                                                                         |

### Embase search terms

15<sup>th</sup> February 2018

| # | Searches                                                                                                                                                          |
|---|-------------------------------------------------------------------------------------------------------------------------------------------------------------------|
| 1 | exp colorectal tumor/                                                                                                                                             |
| 2 | ((colorect* or colo rect* or colon or bowel* or intestine*) adj3 (cancer* or neoplas* or oncolog* or malignan* or tumo?r* or carcinoma* or adeno* or polyp*)).tw. |

|    |                                                             |
|----|-------------------------------------------------------------|
| 3  | (fit* or fobt*).tw.                                         |
| 4  | ((faecal or fecal or feces or faeces) and occult blood).tw. |
| 5  | immunochemistry/                                            |
| 6  | (immunohistochem* or immunochem* or immunol*).tw.           |
| 7  | (1 or 2) and (3 or 4) and (5 or 6)                          |
| 8  | ((faecal or fecal) adj1 immunochem* test*).tw.              |
| 9  | 7 or 8                                                      |
| 10 | limit 9 to (english language and yr="2007 -Current")        |
| 11 | letter.pt. or letter/                                       |
| 12 | note.pt.                                                    |
| 13 | editorial.pt.                                               |
| 14 | case report/ or case study/                                 |
| 15 | (letter or comment*).ti.                                    |
| 16 | or/11-15                                                    |
| 17 | randomized controlled trial/ or random*.ti,ab.              |
| 18 | 16 not 17                                                   |
| 19 | animal/ not human/                                          |
| 20 | nonhuman/                                                   |
| 21 | exp animal experiment/                                      |
| 22 | exp experimental animal/                                    |
| 23 | animal model/                                               |
| 24 | exp rodent/                                                 |
| 25 | (rat or rats or mouse or mice).ti.                          |
| 26 | or/18-25                                                    |
| 27 | 10 not 26                                                   |
| 28 | limit 27 to conference abstract status                      |
| 29 | 27 not 28                                                   |

### Cochrane search terms

15<sup>th</sup> February 2018

| #   | Searches                                                                                                                                                                 |
|-----|--------------------------------------------------------------------------------------------------------------------------------------------------------------------------|
| #1  | MeSH descriptor: [Colorectal Neoplasms] explode all trees                                                                                                                |
| #2  | ((colorect* or colo rect* or colon or bowel* or intestine*) near/3 (cancer* or neoplas* or oncolog* or malignan* or tumo?r* or carcinoma* or adeno* or polyp*)):ti,ab,kw |
| #3  | #1 or #2                                                                                                                                                                 |
| #4  | (fit* or fobt*):ti,ab                                                                                                                                                    |
| #5  | ((faecal or fecal or feces or faeces) and occult blood):ti,ab                                                                                                            |
| #6  | #4 or #5                                                                                                                                                                 |
| #7  | MeSH descriptor: [Immunochemistry] explode all trees                                                                                                                     |
| #8  | (immunohistochem* or immunochem* or immunol*):ti,ab                                                                                                                      |
| #9  | #7 or #8                                                                                                                                                                 |
| #10 | #3 and #6 and #9                                                                                                                                                         |
| #11 | ((faecal or fecal) near/1 immunochem* test*):ti,ab                                                                                                                       |
| #12 | #10 or #11 Publication Year from 2007 to 2018                                                                                                                            |

**CLINICAL TOPIC CQ18 NON-COLONOSCOPIC SURVEILLANCE MODALITIES (COLON CAPSULE)****Clinical question:**

- Can colon capsule be used for surveillance after resection of adenomas?

| <b>P</b>                                                                                                                                            | <b>I/E</b>           | <b>C</b>                | <b>O</b>                                                                                                                                                                                                                                                                    |
|-----------------------------------------------------------------------------------------------------------------------------------------------------|----------------------|-------------------------|-----------------------------------------------------------------------------------------------------------------------------------------------------------------------------------------------------------------------------------------------------------------------------|
| Adults (>18 years) who have been diagnosed with at least one colorectal adenoma and all detected adenomas have been resected completely at baseline | Capsule surveillance | endoscopic surveillance | Subsequent AA incidence, CRC incidence, CRC mortality. Resource use (e.g. Number of procedures/attendances at follow-up/tests completed). Patient-reported outcomes (e.g. preferences, QoL, satisfaction)? Costs and/or cost-effectiveness? Conversion rate to colonoscopy. |

The electronic literature searches were run on 9<sup>th</sup> February 2018 to identify articles which report colon capsule. Terms for 'colon capsule' (3-5) were combined with 'colorectal cancer' population terms (1-2). An English language limit, exclusion publications filter (8-24) and date restriction from 2007 to 2018 was applied.

**Medline search terms**

9<sup>th</sup> February 2018

| <b>#</b> | <b>Searches</b>                                                                                                                                                   |
|----------|-------------------------------------------------------------------------------------------------------------------------------------------------------------------|
| 1        | exp Colorectal Neoplasms/                                                                                                                                         |
| 2        | ((colorect* or colo rect* or colon or bowel* or intestine*) adj3 (cancer* or neoplas* or oncolog* or malignan* or tumo?r* or carcinoma* or adeno* or polyp*)).tw. |
| 3        | Capsule Endoscopy/                                                                                                                                                |
| 4        | (capsule adj3 (colon or endoscop*)).tw.                                                                                                                           |
| 5        | pillcam.tw.                                                                                                                                                       |
| 6        | (1 or 2) and (3 or 4 or 5)                                                                                                                                        |
| 7        | limit 6 to (english language and yr="2007 -Current")                                                                                                              |
| 8        | letter/                                                                                                                                                           |
| 9        | editorial/                                                                                                                                                        |
| 10       | news/                                                                                                                                                             |
| 11       | exp historical article/                                                                                                                                           |
| 12       | anecdotes as topic/                                                                                                                                               |
| 13       | comment/                                                                                                                                                          |
| 14       | case report/                                                                                                                                                      |
| 15       | (letter or comment*).ti.                                                                                                                                          |
| 16       | or/8-15                                                                                                                                                           |
| 17       | randomized controlled trial/ or random*.ti,ab.                                                                                                                    |
| 18       | 16 not 17                                                                                                                                                         |
| 19       | animals/ not humans/                                                                                                                                              |
| 20       | exp animals, laboratory/                                                                                                                                          |
| 21       | exp animal experimentation/                                                                                                                                       |
| 22       | exp models, animal/                                                                                                                                               |
| 23       | exp rodentia/                                                                                                                                                     |

|    |                                    |
|----|------------------------------------|
| 24 | (rat or rats or mouse or mice).ti. |
| 25 | or/18-24                           |
| 26 | 7 not 25                           |

**Embase search terms**9<sup>th</sup> February 2018

| #  | Searches                                                                                                                                                          |
|----|-------------------------------------------------------------------------------------------------------------------------------------------------------------------|
| 1  | exp colorectal tumor/                                                                                                                                             |
| 2  | ((colorect* or colo rect* or colon or bowel* or intestine*) adj3 (cancer* or neoplas* or oncolog* or malignan* or tumo?r* or carcinoma* or adeno* or polyp*)).tw. |
| 3  | capsule endoscopy/                                                                                                                                                |
| 4  | (capsule adj3 (colon or endoscop*)).tw.                                                                                                                           |
| 5  | pillcam.tw.                                                                                                                                                       |
| 6  | (1 or 2) and (3 or 4 or 5)                                                                                                                                        |
| 7  | limit 6 to (english language and yr="2007 -Current")                                                                                                              |
| 8  | letter.pt. or letter/                                                                                                                                             |
| 9  | note.pt.                                                                                                                                                          |
| 10 | editorial.pt.                                                                                                                                                     |
| 11 | case report/ or case study/                                                                                                                                       |
| 12 | (letter or comment*).ti.                                                                                                                                          |
| 13 | or/8-12                                                                                                                                                           |
| 14 | randomized controlled trial/ or random*.ti,ab.                                                                                                                    |
| 15 | 13 not 14                                                                                                                                                         |
| 16 | animal/ not human/                                                                                                                                                |
| 17 | nonhuman/                                                                                                                                                         |
| 18 | exp animal experiment/                                                                                                                                            |
| 19 | exp experimental animal/                                                                                                                                          |
| 20 | animal model/                                                                                                                                                     |
| 21 | exp rodent/                                                                                                                                                       |
| 22 | (rat or rats or mouse or mice).ti.                                                                                                                                |
| 23 | or/15-22                                                                                                                                                          |
| 24 | 7 not 23                                                                                                                                                          |
| 25 | limit 24 to conference abstract status                                                                                                                            |
| 26 | 24 not 25                                                                                                                                                         |

**Cochrane search terms**9<sup>h</sup> February 2018

| #  | Searches                                                                                                                                                                 |
|----|--------------------------------------------------------------------------------------------------------------------------------------------------------------------------|
| #1 | MeSH descriptor: [Colorectal Neoplasms] explode all trees                                                                                                                |
| #2 | ((colorect* or colo rect* or colon or bowel* or intestine*) near/3 (cancer* or neoplas* or oncolog* or malignan* or tumo?r* or carcinoma* or adeno* or polyp*)):ti,ab,kw |
| #3 | MeSH descriptor: [Capsule Endoscopy] this term only                                                                                                                      |
| #4 | (capsule near/3 (colon or endoscop*)):ti,ab,kw                                                                                                                           |

|    |                  |
|----|------------------|
| #5 | pillcam:ti,ab,kw |
| #6 | #1 or #2         |
| #7 | #3 or #4 or #5   |
| #8 | #6 and #7        |

**CLINICAL TOPIC: CQ19-21 NON-COLONOSCOPIC SURVEILLANCE MODALITIES: COLONOGRAPHY**

**Clinical questions:**

- Can CTC be used for polyp surveillance after curative resection of colorectal cancer?
- Can CTC be used for polyp surveillance after previous endoscopic polypectomy?
- What is the risk of the cumulative radiation dose incurred by CTC polyp surveillance and CTC polyp follow-up?

| P                                                                                                   | I/E             | C                                | O                                                                                                                                                                                                                                                                                                                                                                                                                                           |
|-----------------------------------------------------------------------------------------------------|-----------------|----------------------------------|---------------------------------------------------------------------------------------------------------------------------------------------------------------------------------------------------------------------------------------------------------------------------------------------------------------------------------------------------------------------------------------------------------------------------------------------|
| Adults 18+ years with previous resection of colorectal adenocarcinoma with curative intent          | CT colonography | Conventional optical colonoscopy | Sensitivity and specificity of CTC for (a) 6mm+ polyps, (b) 6mm+ adenomas, (c) advanced neoplasia (colorectal cancer or an adenoma with any of: ≥25% villous, high-grade dysplasia, 10mm+ in maximum dimension), (d) colorectal cancer. Post-imaging colorectal cancer (PICRC) rate after CTC for colonic adenoma surveillance. Costs and cost-effectiveness of CTC surveillance vs. (a) no surveillance and (b) colonoscopic surveillance. |
| Adults 18+ years with previous endoscopic polypectomy of at least one histologically-proven adenoma | CT colonography | Conventional optical colonoscopy | Sensitivity and specificity of CTC for (a) 6mm+ polyps, (b) 6mm+ adenomas, (c) advanced neoplasia, (d) colorectal cancer. Post-imaging colorectal cancer (PICRC) rate after CTC for colonic adenoma surveillance. Costs and cost-effectiveness of CTC surveillance vs. (a) no surveillance and (b) colonoscopic surveillance.                                                                                                               |
| Adults 18+ years requiring CTC                                                                      | CT colonography | None                             | Estimated (a) effective radiation dose and (b) radiation-related cancer risk from CTC repeated at (a) 1 year, (b) 2 year, (c) 3 year, (d) 5 year intervals. Risk stratification by age and sex.                                                                                                                                                                                                                                             |

The electronic literature searches were run on 9<sup>th</sup> February 2018 to identify articles which report CT colonography. Terms for 'CT colonography' or 'virtual colonoscopy' (1-7) were used. An English language limit, exclusion publications filter (10-26) and date restriction from 2007 to 2018 was applied.

**Medline search terms**

9<sup>th</sup> February 2018

| # | Searches                                            |
|---|-----------------------------------------------------|
| 1 | Tomography, X-Ray Computed/                         |
| 2 | ((ct or cat) adj2 (imag* or scan* or diagnos*)).tw. |
| 3 | (compute* adj3 tomogra*).tw.                        |
| 4 | or/1-3                                              |
| 5 | colonograph*.tw.                                    |
| 6 | Colonography, Computed Tomographic/                 |

|    |                                                      |
|----|------------------------------------------------------|
| 7  | (virtual colonoscop* or virtual colonograph*).mp.    |
| 8  | (4 and 5) or 6 or 7                                  |
| 9  | limit 8 to (english language and yr="2007 -Current") |
| 10 | letter/                                              |
| 11 | editorial/                                           |
| 12 | news/                                                |
| 13 | exp historical article/                              |
| 14 | anecdotes as topic/                                  |
| 15 | comment/                                             |
| 16 | case report/                                         |
| 17 | (letter or comment*).ti.                             |
| 18 | or/10-17                                             |
| 19 | randomized controlled trial/ or random*.ti,ab.       |
| 20 | 18 not 19                                            |
| 21 | animals/ not humans/                                 |
| 22 | exp animals, laboratory/                             |
| 23 | exp animal experimentation/                          |
| 24 | exp models, animal/                                  |
| 25 | exp rodentia/                                        |
| 26 | (rat or rats or mouse or mice).ti.                   |
| 27 | or/20-26                                             |
| 28 | 9 not 27                                             |

**Embase search terms**9<sup>th</sup> February 2018

| #  | Searches                                             |
|----|------------------------------------------------------|
| 1  | x-ray computed tomography/                           |
| 2  | ((ct or cat) adj2 (imag* or scan* or diagnos*)).tw.  |
| 3  | (compute* adj3 tomogra*).tw.                         |
| 4  | or/1-3                                               |
| 5  | colonograph*.tw.                                     |
| 6  | computed tomographic colonography/                   |
| 7  | (virtual colonoscop* or virtual colonograph*).mp.    |
| 8  | (4 and 5) or 6 or 7                                  |
| 9  | limit 8 to (english language and yr="2007 -Current") |
| 10 | letter.pt. or letter/                                |
| 11 | note.pt.                                             |
| 12 | editorial.pt.                                        |
| 13 | case report/ or case study/                          |
| 14 | (letter or comment*).ti.                             |
| 15 | or/10-14                                             |
| 16 | randomized controlled trial/ or random*.ti,ab.       |
| 17 | 15 not 16                                            |
| 18 | animal/ not human/                                   |

|    |                                        |
|----|----------------------------------------|
| 19 | nonhuman/                              |
| 20 | exp animal experiment/                 |
| 21 | exp experimental animal/               |
| 22 | animal model/                          |
| 23 | exp rodent/                            |
| 24 | (rat or rats or mouse or mice).ti.     |
| 25 | or/17-24                               |
| 26 | 9 not 25                               |
| 27 | limit 26 to conference abstract status |
| 28 | 26 not 27                              |

### Cochrane search terms

9<sup>th</sup> February 2018

| #  | Searches                                                                |
|----|-------------------------------------------------------------------------|
| #1 | MeSH descriptor: [Tomography, X-Ray Computed] this term only            |
| #2 | ((ct or cat) near/2 (imag* or scan* or diagnos*)):ti,ab                 |
| #3 | (compute* near/3 tomogra*):ti,ab                                        |
| #4 | {or #1-#3}                                                              |
| #5 | colonograph*:ti,ab                                                      |
| #6 | MeSH descriptor: [Colonography, Computed Tomographic] explode all trees |
| #7 | (virtual colonoscop* or virtual colonograph*):ti,ab                     |
| #8 | #4 and #5                                                               |
| #9 | #6 or #7 or #8 Publication Year from 2007 to 2018                       |

### CLINICAL TOPIC: CQ22-24 POST-CRC SURGERY

#### Clinical questions:

- Does surveillance, post-CRC surgical resection, reduce metachronous CRC incidence/mortality? Surgical resection includes open, laparoscopic and robotic.
- Does surveillance, post-CRC endoscopic resection, reduce metachronous CRC incidence/mortality? Endoscopic resection includes endoscopic, transanal, TEMS and its variations
- Does surveillance following surgical resection of CRC metastases reduce mortality?

| P                                                                                                                                                                                            | I/E                                                                                                                                                         | C                         | O                                                                                                         |
|----------------------------------------------------------------------------------------------------------------------------------------------------------------------------------------------|-------------------------------------------------------------------------------------------------------------------------------------------------------------|---------------------------|-----------------------------------------------------------------------------------------------------------|
| adults who have undergone potentially curative surgical treatment for primary CRC and have had a baseline clearance colonoscopy. Exclude patients with genetic syndromes predisposing to CRC | FIT; colonoscopy; CT Colonography; Clinical examination; CEA; Imaging (U/S, CT, PET CT, chest x-ray); stratified by frequency of each surveillance modality | absence of "intervention" | Incidence of luminally recurrent or metachronous CRC; CRC mortality; all cause mortality; Quality of life |
| adults who have undergone potentially curative endoscopic treatment for primary CRC and have had a baseline clearance colonoscopy. Exclude patients with genetic syndromes                   | FIT; colonoscopy; CT Colonography; Clinical examination; CEA; Imaging (U/S, CT, PET CT, chest x-ray); stratified by frequency of each surveillance modality | absence of "intervention" | Incidence of luminally recurrent or metachronous CRC; CRC mortality; all cause mortality; Quality of life |



|                                                                             |                                                                                                                                                             |                           |                                                                                                           |
|-----------------------------------------------------------------------------|-------------------------------------------------------------------------------------------------------------------------------------------------------------|---------------------------|-----------------------------------------------------------------------------------------------------------|
| predisposing to CRC                                                         |                                                                                                                                                             |                           |                                                                                                           |
| adults who have undergone potentially curative resection for metastatic CRC | FIT; colonoscopy; CT Colonography; Clinical examination; CEA; Imaging (U/S, CT, PET CT, chest x-ray); stratified by frequency of each surveillance modality | absence of "intervention" | Incidence of luminally recurrent or metachronous CRC; CRC mortality; all cause mortality; Quality of life |

The electronic literature searches were run on 19<sup>th</sup> February 2018 to identify articles which report surveillance post-CRC surgery. The search is an update of the BSG/ACP 2010 guidelines. Terms for 'laparoscopic or endoscopic surgery' (4-7) were combined with 'colorectal cancer' population terms (1-2) and the various surveillance modalities (FIT; colonoscopy; CT Colonography; U/S; CT; PET CT; and chest x-ray (9-26)) or surveillance (27). An English language limit, exclusion publications filter (33-49) and date restriction from 2007 to 2018 was applied.

### Medline search terms

19<sup>th</sup> February 2018

| #  | Searches                                                                                                                                                         |
|----|------------------------------------------------------------------------------------------------------------------------------------------------------------------|
| 1  | exp Colorectal Neoplasms/                                                                                                                                        |
| 2  | ((colorect* or colo rect* or colon or bowel* or intestine*) adj3 (cancer* or neoplas* or oncolog* or malignan* or tumo?* or carcinoma* or adeno* or polyp*)).tw. |
| 3  | 1 or 2                                                                                                                                                           |
| 4  | exp General Surgery/                                                                                                                                             |
| 5  | exp Endoscopy/                                                                                                                                                   |
| 6  | exp Laparoscopy/                                                                                                                                                 |
| 7  | ((endoscop* or laparoscop*) and (surger* or resect*)).tw.                                                                                                        |
| 8  | (4 and (5 or 6)) or 7                                                                                                                                            |
| 9  | Colonoscopy/                                                                                                                                                     |
| 10 | (colonoscop* or postcolonoscop*).tw.                                                                                                                             |
| 11 | (fit* or fobt*).tw.                                                                                                                                              |
| 12 | ((faecal or fecal or feces or faeces) and occult blood).tw.                                                                                                      |
| 13 | exp Immunochemistry/                                                                                                                                             |
| 14 | (immunohistochem* or immunochem* or immunol*).tw.                                                                                                                |
| 15 | (11 or 12) and (13 or 14)                                                                                                                                        |
| 16 | ((faecal or fecal) adj1 immunochem* test*).tw.                                                                                                                   |
| 17 | Tomography, X-Ray Computed/                                                                                                                                      |
| 18 | ((ct or cat) adj2 (imag* or scan* or diagnos*)).tw.                                                                                                              |
| 19 | (compute* adj3 tomogra*).tw.                                                                                                                                     |
| 20 | Colonography, Computed Tomographic/                                                                                                                              |
| 21 | (virtual colonoscop* or virtual colonograph*).mp.                                                                                                                |
| 22 | Ultrasonics/                                                                                                                                                     |
| 23 | ultrasonic*.mp.                                                                                                                                                  |
| 24 | ultrasound.mp.                                                                                                                                                   |
| 25 | exp Radiography/                                                                                                                                                 |

|    |                                                       |
|----|-------------------------------------------------------|
| 26 | x ray.mp.                                             |
| 27 | or/9-10,15-26                                         |
| 28 | surveillance.tw.                                      |
| 29 | 3 and 8 and 27                                        |
| 30 | 3 and 8 and 28                                        |
| 31 | 29 or 30                                              |
| 32 | limit 31 to (english language and yr="2007 -Current") |
| 33 | letter/                                               |
| 34 | editorial/                                            |
| 35 | news/                                                 |
| 36 | exp historical article/                               |
| 37 | anecdotes as topic/                                   |
| 38 | comment/                                              |
| 39 | case report/                                          |
| 40 | (letter or comment*).ti.                              |
| 41 | or/33-40                                              |
| 42 | randomized controlled trial/ or random*.ti,ab.        |
| 43 | 41 not 42                                             |
| 44 | animals/ not humans/                                  |
| 45 | exp animals, laboratory/                              |
| 46 | exp animal experimentation/                           |
| 47 | exp models, animal/                                   |
| 48 | exp rodentia/                                         |
| 49 | (rat or rats or mouse or mice).ti.                    |
| 50 | or/43-49                                              |
| 51 | 32 not 50                                             |

**Embase search terms**19<sup>th</sup> February 2018

| #  | Searches                                                                                                                                                          |
|----|-------------------------------------------------------------------------------------------------------------------------------------------------------------------|
| 1  | exp colorectal tumor/                                                                                                                                             |
| 2  | ((colorect* or colo rect* or colon or bowel* or intestine*) adj3 (cancer* or neoplas* or oncolog* or malignan* or tumo?r* or carcinoma* or adeno* or polyp*)).tw. |
| 3  | 1 or 2                                                                                                                                                            |
| 4  | exp general surgery/                                                                                                                                              |
| 5  | exp endoscopy/                                                                                                                                                    |
| 6  | exp laparoscopy/                                                                                                                                                  |
| 7  | ((endoscop* or laparoscop*) and (surger* or resect*)).tw.                                                                                                         |
| 8  | (4 and (5 or 6)) or 7                                                                                                                                             |
| 9  | exp colonoscopy/                                                                                                                                                  |
| 10 | (colonoscop* or postcolonoscop*).tw.                                                                                                                              |
| 11 | (fit* or fobt*).tw.                                                                                                                                               |
| 12 | ((faecal or fecal or feces or faeces) and occult blood).tw.                                                                                                       |
| 13 | immunochemistry/                                                                                                                                                  |

|    |                                                       |
|----|-------------------------------------------------------|
| 14 | (immunohistochem* or immunochem* or immunol*).tw.     |
| 15 | (11 or 12) and (13 or 14)                             |
| 16 | ((faecal or fecal) adj1 immunochem* test*).tw.        |
| 17 | x-ray computed tomography/                            |
| 18 | ((ct or cat) adj2 (imag* or scan* or diagnos*)).tw.   |
| 19 | (compute* adj3 tomogra*).tw.                          |
| 20 | computed tomographic colonography/                    |
| 21 | (virtual colonoscop* or virtual colonograph*).mp.     |
| 22 | ultrasound/                                           |
| 23 | ultrasonic*.mp.                                       |
| 24 | ultrasound.mp.                                        |
| 25 | exp radiography/                                      |
| 26 | x ray.mp.                                             |
| 27 | or/9-10,15-26                                         |
| 28 | surveillance.tw.                                      |
| 29 | 3 and 8 and 27                                        |
| 30 | 3 and 8 and 28                                        |
| 31 | 29 or 30                                              |
| 32 | limit 31 to (english language and yr="2007 -Current") |
| 33 | letter.pt. or letter/                                 |
| 34 | note.pt.                                              |
| 35 | editorial.pt.                                         |
| 36 | case report/ or case study/                           |
| 37 | (letter or comment*).ti.                              |
| 38 | or/33-37                                              |
| 39 | randomized controlled trial/ or random*.ti,ab.        |
| 40 | 38 not 39                                             |
| 41 | animal/ not human/                                    |
| 42 | nonhuman/                                             |
| 43 | exp animal experiment/                                |
| 44 | exp experimental animal/                              |
| 45 | animal model/                                         |
| 46 | exp rodent/                                           |
| 47 | (rat or rats or mouse or mice).ti.                    |
| 48 | or/40-47                                              |
| 49 | 32 not 48                                             |
| 50 | limit 49 to conference abstract status                |
| 51 | 49 not 50                                             |

**Cochrane search terms**19<sup>th</sup> February 2018

| #  | Searches                                                     |
|----|--------------------------------------------------------------|
| #1 | MeSH descriptor: [Tomography, X-Ray Computed] this term only |
| #2 | ((ct or cat) near/2 (imag* or scan* or diagnos*)):ti,ab      |

|    |                                                                         |
|----|-------------------------------------------------------------------------|
| #3 | (compute* near/3 tomogra*):ti,ab                                        |
| #4 | {or #1-#3}                                                              |
| #5 | colonograph*:ti,ab                                                      |
| #6 | MeSH descriptor: [Colonography, Computed Tomographic] explode all trees |
| #7 | (virtual colonoscop* or virtual colonograph*):ti,ab                     |
| #8 | #4 and #5                                                               |
| #9 | #6 or #7 or #8 Publication Year from 2007 to 2018                       |

### **CLINICAL TOPIC: CQ25-27 SERRATED POLYPS**

#### **Clinical questions:**

- What is the risk of cancer / advanced neoplasia / neoplasia after detection of a sessile serrated lesion=>10mm / SSL with dysplasia / traditional serrated adenoma
- What is the risk of cancer / advanced neoplasia / neoplasia after detection of a sessile serrated lesion <10mm without dysplasia
- What is the risk of cancer / advanced neoplasia / neoplasia after detection of serrated polyposis syndrome (hyperplastic polyposis)

| <b>P</b>                                                                                                                | <b>I/E</b>              | <b>C</b>        | <b>O</b>                                                                                                                                                |
|-------------------------------------------------------------------------------------------------------------------------|-------------------------|-----------------|---------------------------------------------------------------------------------------------------------------------------------------------------------|
| Adults with a sessile serrated lesion=>10mm / SSL with dysplasia / traditional serrated adenoma detected at colonoscopy | endoscopic surveillance | No surveillance | Any neoplasia at next surveillance, advanced neoplasia at next surveillance, CRC at next surveillance, Long term CRC incidence, Long term CRC mortality |
| Adults with a sessile serrated lesion detected at colonoscopy                                                           | endoscopic surveillance | No surveillance | Any neoplasia at next surveillance, advanced neoplasia at next surveillance, CRC at next surveillance, Long term CRC incidence, Long term CRC mortality |
| Adults with a sessile serrated lesion detected at colonoscopy                                                           | endoscopic surveillance | No surveillance | Any neoplasia at next surveillance, advanced neoplasia at next surveillance, CRC at next surveillance, Long term CRC incidence, Long term CRC mortality |

The electronic literature searches were run on 19<sup>th</sup> February 2018 to identify articles which report serrated polyps. The search is an update of the BSG serrated position statement (Gut 2017). Terms for 'polyps or lesion' (4-7) were combined with 'colonoscopy' population terms (1-2). The BSG serrated position statement searches were run up until 2015. An English language limit, exclusion publications filter (12-28) and date restriction from 2015 to 2018 was applied.

#### **Medline search terms**

19<sup>th</sup> February 2018

|          | <b>Ovid MEDLINE(R) Epub Ahead of Print, In-Process &amp; Other Non-Indexed Citations, Ovid MEDLINE(R) Daily and Ovid MEDLINE(R) 1946 to Present</b> |
|----------|-----------------------------------------------------------------------------------------------------------------------------------------------------|
| <b>#</b> | <b>Searches</b>                                                                                                                                     |
| 1        | Colonoscopy/                                                                                                                                        |
| 2        | (colonoscop* or postcolonoscop*).tw.                                                                                                                |
| 3        | 1 or 2                                                                                                                                              |
| 4        | Adenoma/                                                                                                                                            |

|    |                                                       |
|----|-------------------------------------------------------|
| 5  | (adenoma* or neoplasia).tw.                           |
| 6  | Intestinal Polyps/                                    |
| 7  | (polyp* or lesion*).tw.                               |
| 8  | or/4-7                                                |
| 9  | (sessile or serrated or hyperplastic).tw.             |
| 10 | 3 and 8 and 9                                         |
| 11 | limit 10 to (english language and yr="2015 -Current") |
| 12 | letter/                                               |
| 13 | editorial/                                            |
| 14 | news/                                                 |
| 15 | exp historical article/                               |
| 16 | anecdotes as topic/                                   |
| 17 | comment/                                              |
| 18 | case report/                                          |
| 19 | (letter or comment*).ti.                              |
| 20 | or/12-19                                              |
| 21 | randomized controlled trial/ or random*.ti,ab.        |
| 22 | 20 not 21                                             |
| 23 | animals/ not humans/                                  |
| 24 | exp animals, laboratory/                              |
| 25 | exp animal experimentation/                           |
| 26 | exp models, animal/                                   |
| 27 | exp rodentia/                                         |
| 28 | (rat or rats or mouse or mice).ti.                    |
| 29 | or/22-28                                              |
| 30 | 11 not 29                                             |

**Embase search terms**19<sup>th</sup> February 2018

| #  | Searches                                              |
|----|-------------------------------------------------------|
| 1  | exp colonoscopy/                                      |
| 2  | (colonoscop* or postcolonoscop*).tw.                  |
| 3  | 1 or 2                                                |
| 4  | adenoma/                                              |
| 5  | (adenoma* or neoplasia).tw.                           |
| 6  | exp intestine polyp/                                  |
| 7  | (polyp* or lesion*).tw.                               |
| 8  | or/4-7                                                |
| 9  | (sessile or serrated or hyperplastic).tw.             |
| 10 | 3 and 8 and 9                                         |
| 11 | limit 10 to (english language and yr="2015 -Current") |
| 12 | letter.pt. or letter/                                 |
| 13 | note.pt.                                              |
| 14 | editorial.pt.                                         |

|    |                                                |
|----|------------------------------------------------|
| 15 | case report/ or case study/                    |
| 16 | (letter or comment*).ti.                       |
| 17 | or/12-16                                       |
| 18 | randomized controlled trial/ or random*.ti,ab. |
| 19 | 17 not 18                                      |
| 20 | animal/ not human/                             |
| 21 | nonhuman/                                      |
| 22 | exp animal experiment/                         |
| 23 | exp experimental animal/                       |
| 24 | animal model/                                  |
| 25 | exp rodent/                                    |
| 26 | (rat or rats or mouse or mice).ti.             |
| 27 | or/19-26                                       |
| 28 | 11 not 27                                      |
| 29 | limit 28 to conference abstract status         |
| 30 | 28 not 29                                      |

**Cochrane search terms**19<sup>th</sup> February 2018

| #   | Searches                                            |
|-----|-----------------------------------------------------|
| #1  | MeSH descriptor: [Colonoscopy] this term only       |
| #2  | (colonoscop* or postcolonoscop*):ti,ab              |
| #3  | #1 or #2                                            |
| #4  | MeSH descriptor: [Adenoma] this term only           |
| #5  | (adenoma* or neoplasia):ti,ab                       |
| #6  | MeSH descriptor: [Intestinal Polyps] this term only |
| #7  | (polyp* or lesion*):ti,ab                           |
| #8  | {or #4-#7}                                          |
| #9  | (sessile or serrated or hyperplastic):ti,ab         |
| #10 | #3 and #8 and #9 Publication Year from 2015 to 2018 |

**CLINICAL TOPIC: CQ28-30 POST-EMR/ESD FOLLOW-UP****Clinical questions:**

- What is the risk of recurrence after complete (En bloc R0) versus piecemeal EMR
- What is the risk of recurrence after complete (En bloc R0) versus piecemeal ESD
- What is the risk of early recurrence after EMR

| P                                                         | I/E                                                                               | C                                                                                                                        | O                                                      |
|-----------------------------------------------------------|-----------------------------------------------------------------------------------|--------------------------------------------------------------------------------------------------------------------------|--------------------------------------------------------|
| Patients undergoing endoscopic resection of polyps =>20mm | Endoscopic mucosal resection (EMR) with pathologically clear margins (En bloc R0) | Endoscopic mucosal resection (EMR) without pathologically clear margins (R1) or involved margins or piecemeal resections | Polyp recurrence at 6 months, 12-18 months and 3 years |

|                                                           |                                                                                       |                                                                                                                              |                                                        |
|-----------------------------------------------------------|---------------------------------------------------------------------------------------|------------------------------------------------------------------------------------------------------------------------------|--------------------------------------------------------|
| Patients undergoing endoscopic resection of polyps =>20mm | Endoscopic submucosal dissection (ESD) with pathologically clear margins (En bloc R0) | Endoscopic submucosal dissection (ESD) without pathologically clear margins (R1) or involved margins or piecemeal resections | Polyp recurrence at 6 months, 12-18 months and 3 years |
| Patients undergoing endoscopic resection of polyps =>20mm | Endoscopic EMR site check at 3 months                                                 | Endoscopic EMR site check at 6 months                                                                                        | Polyp recurrence at site check                         |

The electronic literature searches were run on 15<sup>th</sup> February 2018 to identify articles which report Post-EMR/ESD follow-up. The search is to integrate with BSG LNPCP guidelines. Terms for 'endoscopic mucosal resection' or 'endoscopic submucosal dissection' (2-5) provided by the GDG were combined with 'colon' terms (1). The BCG LNPCP guideline searches were run up until May 2014. An English language limit, exclusion publications filter (9-25) and date restriction from 2014 to 2018 was applied.

### Medline search terms

15<sup>th</sup> February 2018

| #  | Searches                                                       |
|----|----------------------------------------------------------------|
| 1  | (colorect* or colo rect* or colon or bowel* or intestine*).tw. |
| 2  | Endoscopic Mucosal Resection/                                  |
| 3  | (endoscop* adj5 mucosa* adj5 resect*).tw.                      |
| 4  | (endoscop* adj3 mucosectom*).tw.                               |
| 5  | (endoscop* adj5 submucos* adj5 dissect*).tw.                   |
| 6  | or/2-5                                                         |
| 7  | 1 and 6                                                        |
| 8  | limit 7 to (english language and yr="2014 -Current")           |
| 9  | letter/                                                        |
| 10 | editorial/                                                     |
| 11 | news/                                                          |
| 12 | exp historical article/                                        |
| 13 | anecdotes as topic/                                            |
| 14 | comment/                                                       |
| 15 | case report/                                                   |
| 16 | (letter or comment*).ti.                                       |
| 17 | or/9-16                                                        |
| 18 | randomized controlled trial/ or random*.ti,ab.                 |
| 19 | 17 not 18                                                      |
| 20 | animals/ not humans/                                           |
| 21 | exp animals, laboratory/                                       |
| 22 | exp animal experimentation/                                    |
| 23 | exp models, animal/                                            |
| 24 | exp rodentia/                                                  |
| 25 | (rat or rats or mouse or mice).ti.                             |
| 26 | or/19-25                                                       |
| 27 | 8 not 26                                                       |

**Embase search terms**

15h February 2018

| #  | Searches                                                       |
|----|----------------------------------------------------------------|
| 1  | (colorect* or colo rect* or colon or bowel* or intestine*).tw. |
| 2  | endoscopic mucosal resection/                                  |
| 3  | (endoscop* adj5 mucosa* adj5 resect*).tw.                      |
| 4  | (endoscop* adj3 mucosectom*).tw.                               |
| 5  | (endoscop* adj5 submucos* adj5 dissect*).tw.                   |
| 6  | or/2-5                                                         |
| 7  | 1 and 6                                                        |
| 8  | limit 7 to (english language and yr="2014 -Current")           |
| 9  | letter.pt. or letter/                                          |
| 10 | note.pt.                                                       |
| 11 | editorial.pt.                                                  |
| 12 | case report/ or case study/                                    |
| 13 | (letter or comment*).ti.                                       |
| 14 | or/9-13                                                        |
| 15 | randomized controlled trial/ or random*.ti,ab.                 |
| 16 | 14 not 15                                                      |
| 17 | animal/ not human/                                             |
| 18 | nonhuman/                                                      |
| 19 | exp animal experiment/                                         |
| 20 | exp experimental animal/                                       |
| 21 | animal model/                                                  |
| 22 | exp rodent/                                                    |
| 23 | (rat or rats or mouse or mice).ti.                             |
| 24 | or/16-23                                                       |
| 25 | 8 not 24                                                       |
| 26 | limit 25 to conference abstract status                         |
| 27 | 25 not 26                                                      |

**Cochrane search terms**15<sup>th</sup> February 2018

| #  | Searches                                                         |
|----|------------------------------------------------------------------|
| #1 | (colorect* or colo rect* or colon or bowel* or intestine*):ti,ab |
| #2 | MeSH descriptor: [Endoscopic Mucosal Resection] this term only   |
| #3 | (endoscop* near/5 mucosa* near/5 resect*):ti,ab                  |
| #4 | (endoscop* near/3 mucosectom*):ti,ab                             |
| #5 | (endoscop* near/5 submucos* near/5 dissect*):ti,ab               |
| #6 | {or #2-#5}                                                       |
| #7 | #1 and #6 Publication Year from 2014 to 2018                     |

**CLINICAL TOPIC: CQ32 PATIENT INFORMATION**



**Clinical question:**

- Patient communication, including: Patient lifestyle modifications; What information should patient be given? Include transition to new guidelines; How should shared decision-making be supported?

| P                                                                                                                                                   | I/E | C | O |
|-----------------------------------------------------------------------------------------------------------------------------------------------------|-----|---|---|
| Adults (>18 years) who have been diagnosed with at least one colorectal adenoma and all detected adenomas have been resected completely at baseline |     |   |   |

The electronic literature searches were run on 20<sup>th</sup> February 2018 to identify articles which report Patient information. Terms for 'decision making' or 'communication' (including information needs, consent) or 'patient satisfaction' (including expectations, experience, views, attitudes, preferences) (4-12) provided by the GDG were combined with 'colorectal cancer' terms (1-2). Study design filters were applied to limit the search to systematic reviews (35-44) and RCT (47-53) studies only. An English language limit, exclusion publications filter (16-32) and date restriction from 2007 to 2018 was applied.

**Medline search terms**

20<sup>th</sup> February 2018

| #  | Searches                                                                                                                                                          |
|----|-------------------------------------------------------------------------------------------------------------------------------------------------------------------|
| 1  | exp Colorectal Neoplasms/                                                                                                                                         |
| 2  | ((colorect* or colo rect* or colon or bowel* or intestine*) adj3 (cancer* or neoplas* or oncolog* or malignan* or tumo?r* or carcinoma* or adeno* or polyp*)).tw. |
| 3  | 1 or 2                                                                                                                                                            |
| 4  | *Decision Making/                                                                                                                                                 |
| 5  | shared decision making.tw.                                                                                                                                        |
| 6  | *Informed Consent/                                                                                                                                                |
| 7  | (informed adj (consent or choice* or decision*)).tw.                                                                                                              |
| 8  | *Patient Satisfaction/                                                                                                                                            |
| 9  | (patient* adj5 (satisf* or experience* or expectation* or preference* or need* or perspective* or attitude* or view* or opinion* or choice* or accept*)).tw.      |
| 10 | *Patient Education as Topic/                                                                                                                                      |
| 11 | exp *Communication/                                                                                                                                               |
| 12 | (patient* adj5 (communicat* or inform* or educat*)).tw.                                                                                                           |
| 13 | or/4-12                                                                                                                                                           |
| 14 | 3 and 13                                                                                                                                                          |
| 15 | limit 14 to (english language and yr="2007 -Current")                                                                                                             |
| 16 | letter/                                                                                                                                                           |
| 17 | editorial/                                                                                                                                                        |
| 18 | news/                                                                                                                                                             |
| 19 | exp historical article/                                                                                                                                           |
| 20 | anecdotes as topic/                                                                                                                                               |
| 21 | comment/                                                                                                                                                          |
| 22 | case report/                                                                                                                                                      |

|    |                                                                                                                                                         |
|----|---------------------------------------------------------------------------------------------------------------------------------------------------------|
| 23 | (letter or comment*).ti.                                                                                                                                |
| 24 | or/16-23                                                                                                                                                |
| 25 | randomized controlled trial/ or random*.ti,ab.                                                                                                          |
| 26 | 24 not 25                                                                                                                                               |
| 27 | animals/ not humans/                                                                                                                                    |
| 28 | exp animals, laboratory/                                                                                                                                |
| 29 | exp animal experimentation/                                                                                                                             |
| 30 | exp models, animal/                                                                                                                                     |
| 31 | exp rodentia/                                                                                                                                           |
| 32 | (rat or rats or mouse or mice).ti.                                                                                                                      |
| 33 | or/26-32                                                                                                                                                |
| 34 | 15 not 33                                                                                                                                               |
| 35 | meta-analysis/                                                                                                                                          |
| 36 | meta-analysis as topic/                                                                                                                                 |
| 37 | (meta analy* or metanaly* or metaanaly*).ti,ab.                                                                                                         |
| 38 | ((systematic* or evidence*) adj3 (review* or overview*)).ti,ab.                                                                                         |
| 39 | (reference list* or bibliograph* or hand search* or manual search* or relevant journals).ab.                                                            |
| 40 | (search strategy or search criteria or systematic search or study selection or data extraction).ab.                                                     |
| 41 | (search* adj4 literature).ab.                                                                                                                           |
| 42 | (medline or pubmed or cochrane or embase or psychlit or psyclit or psychinfo or psycinfo or cinahl or scie nce citation index or bids or cancerlit).ab. |
| 43 | cochrane.jw.                                                                                                                                            |
| 44 | ((multiple treatment* or indirect or mixed) adj2 comparison*).ti,ab.                                                                                    |
| 45 | or/35-44                                                                                                                                                |
| 46 | 34 and 45                                                                                                                                               |
| 47 | randomized controlled trial.pt.                                                                                                                         |
| 48 | controlled clinical trial.pt.                                                                                                                           |
| 49 | randomi#ed.ti,ab.                                                                                                                                       |
| 50 | placebo.ab.                                                                                                                                             |
| 51 | randomly.ti,ab.                                                                                                                                         |
| 52 | clinical trials as topic.sh.                                                                                                                            |
| 53 | trial.ti.                                                                                                                                               |
| 54 | or/47-53                                                                                                                                                |
| 55 | 34 and 54                                                                                                                                               |
| 56 | 46 or 55                                                                                                                                                |

**Embase search terms**20<sup>th</sup> February 2018

| # | Searches                                                                                                                                                          |
|---|-------------------------------------------------------------------------------------------------------------------------------------------------------------------|
| 1 | exp colorectal tumor/                                                                                                                                             |
| 2 | ((colorect* or colo rect* or colon or bowel* or intestine*) adj3 (cancer* or neoplas* or oncolog* or malignan* or tumo?r* or carcinoma* or adeno* or polyp*)).tw. |

|    |                                                                                                                                                              |
|----|--------------------------------------------------------------------------------------------------------------------------------------------------------------|
| 3  | 1 or 2                                                                                                                                                       |
| 4  | *decision making/                                                                                                                                            |
| 5  | shared decision making.tw.                                                                                                                                   |
| 6  | *informed consent/                                                                                                                                           |
| 7  | (informed adj (consent or choice* or decision*)).tw.                                                                                                         |
| 8  | *patient satisfaction/                                                                                                                                       |
| 9  | (patient* adj5 (satisf* or experience* or expectation* or preference* or need* or perspective* or attitude* or view* or opinion* or choice* or accept*)).tw. |
| 10 | *patient education/                                                                                                                                          |
| 11 | exp *interpersonal communication/                                                                                                                            |
| 12 | (patient* adj5 (communicat* or inform* or educat*)).tw.                                                                                                      |
| 13 | or/4-12                                                                                                                                                      |
| 14 | 3 and 13                                                                                                                                                     |
| 15 | limit 14 to (english language and yr="2007 -Current")                                                                                                        |
| 16 | letter.pt. or letter/                                                                                                                                        |
| 17 | note.pt.                                                                                                                                                     |
| 18 | editorial.pt.                                                                                                                                                |
| 19 | case report/ or case study/                                                                                                                                  |
| 20 | (letter or comment*).ti.                                                                                                                                     |
| 21 | or/16-20                                                                                                                                                     |
| 22 | randomized controlled trial/ or random*.ti,ab.                                                                                                               |
| 23 | 21 not 22                                                                                                                                                    |
| 24 | animal/ not human/                                                                                                                                           |
| 25 | nonhuman/                                                                                                                                                    |
| 26 | exp animal experiment/                                                                                                                                       |
| 27 | exp experimental animal/                                                                                                                                     |
| 28 | animal model/                                                                                                                                                |
| 29 | exp rodent/                                                                                                                                                  |
| 30 | (rat or rats or mouse or mice).ti.                                                                                                                           |
| 31 | or/23-30                                                                                                                                                     |
| 32 | 15 not 31                                                                                                                                                    |
| 33 | systematic review/                                                                                                                                           |
| 34 | meta-analysis/                                                                                                                                               |
| 35 | (meta analy* or metanaly* or metaanaly*).ti,ab.                                                                                                              |
| 36 | ((systematic or evidence) adj3 (review* or overview*)).ti,ab.                                                                                                |
| 37 | (reference list* or bibliograph* or hand search* or manual search* or relevant journals).ab.                                                                 |
| 38 | (search strategy or search criteria or systematic search or study selection or data extraction).ab.                                                          |
| 39 | (search* adj4 literature).ab.                                                                                                                                |
| 40 | (medline or pubmed or cochrane or embase or psychlit or psyclit or psychinfo or psycinfo or cinahl or science citation index or bids or cancerlit).ab.       |
| 41 | cochrane.jw.                                                                                                                                                 |
| 42 | ((multiple treatment* or indirect or mixed) adj2 comparison*).ti,ab.                                                                                         |
| 43 | or/33-42                                                                                                                                                     |

|    |                                                        |
|----|--------------------------------------------------------|
| 44 | 32 and 43                                              |
| 45 | random*.ti,ab.                                         |
| 46 | factorial*.ti,ab.                                      |
| 47 | (crossover* or cross over*).ti,ab.                     |
| 48 | ((doubl* or singl*) adj blind*).ti,ab.                 |
| 49 | (assign* or allocat* or volunteer* or placebo*).ti,ab. |
| 50 | crossover procedure/                                   |
| 51 | single blind procedure/                                |
| 52 | randomized controlled trial/                           |
| 53 | double blind procedure/                                |
| 54 | or/45-53                                               |
| 55 | 32 and 54                                              |
| 56 | 44 or 55                                               |
| 57 | limit 56 to conference abstract status                 |
| 58 | 56 not 57                                              |

### Cochrane search terms

20<sup>th</sup> February 2018

| #   | Searches                                                                                                                                                              |
|-----|-----------------------------------------------------------------------------------------------------------------------------------------------------------------------|
| #1  | MeSH descriptor: [Colorectal Neoplasms] explode all trees                                                                                                             |
| #2  | ((colorect* or colo rect* or colon or bowel* or intestine*) near/3 (cancer* or neoplas* or oncolog* or malignan* or tumo?r* or carcinoma* or adeno* or polyp*)):ti,ab |
| #3  | #1 or #2                                                                                                                                                              |
| #4  | MeSH descriptor: [Decision Making] this term only                                                                                                                     |
| #5  | shared decision making:ti,ab                                                                                                                                          |
| #6  | MeSH descriptor: [Informed Consent] this term only                                                                                                                    |
| #7  | (informed near (consent or choice* or decision*)):ti,ab                                                                                                               |
| #8  | MeSH descriptor: [Patient Satisfaction] this term only                                                                                                                |
| #9  | (patient* near/5 (satisf* or experience* or expectation* or preference* or need* or perspective* or attitude* or view* or opinion* or choice* or accept*)):ti,ab      |
| #10 | MeSH descriptor: [Patient Education as Topic] explode all trees                                                                                                       |
| #11 | MeSH descriptor: [Communication] explode all trees                                                                                                                    |
| #12 | (patient* near/5 (communicat* or inform* or educat*)):ti,ab                                                                                                           |
| #13 | {or #4-#12}                                                                                                                                                           |
| #14 | #3 and #13 Publication Year from 2007 to 2018                                                                                                                         |
